# Supplementary material for: A systematic review to identify and assess the effectiveness of alternatives for people over the age of 65 who are at risk of potentially avoidable hospital admission
Source: PubMed Central journal article supplement — BMJ Open. 2017 Aug 1;7(7):e016236. doi: 10.1136/bmjopen-2017-016236 (PMC5642761; doi:10.1136/bmjopen-2017-016236), 2017-08-01
Supplement: bmjopen-2017-016236.draft_revisions.pdf [file bmjopen-2017-016236.draft_revisions.pdf]

# BMJ Open

**A systematic review to identify and assess the effectiveness of alternatives for people over the age of 65 who are at risk of potentially avoidable hospital admission.**

|                                 |                                                                                                                                                                                                                                                                                                                                                                                                                                                                                                                                                                                                                                                                                                                                                       |
|---------------------------------|-------------------------------------------------------------------------------------------------------------------------------------------------------------------------------------------------------------------------------------------------------------------------------------------------------------------------------------------------------------------------------------------------------------------------------------------------------------------------------------------------------------------------------------------------------------------------------------------------------------------------------------------------------------------------------------------------------------------------------------------------------|
| Journal:                        | <i>BMJ Open</i>                                                                                                                                                                                                                                                                                                                                                                                                                                                                                                                                                                                                                                                                                                                                       |
| Manuscript ID                   | bmjopen-2017-016236                                                                                                                                                                                                                                                                                                                                                                                                                                                                                                                                                                                                                                                                                                                                   |
| Article Type:                   | Research                                                                                                                                                                                                                                                                                                                                                                                                                                                                                                                                                                                                                                                                                                                                              |
| Date Submitted by the Author:   | 02-Feb-2017                                                                                                                                                                                                                                                                                                                                                                                                                                                                                                                                                                                                                                                                                                                                           |
| Complete List of Authors:       | Huntley, Alyson; University of Bristol , School of Social & Community Medicine<br>Chalder, Melanie; University of Bristol, School of Social & Community Medicine<br>Shaw, Ali; University of Bristol, School of Social & Community Medicine<br>Hollingworth, William; University of Bristol, School of Social & Community Medicine<br>Metcalf, Chris; University of Bristol, Bristol Randomised Trials Collaboration; University of Bristol , School of Social & Community medicine<br>Benger, Jonathan; The University Hospitals NHS Foundation trust, Academic Department of Emergency care; The University of the West of England, Faculty of Health & Life Sciences<br>Purdy, Sarah; University of Bristol, School of Social & Community Medicine |
| <b>Primary Subject Heading</b>: | Emergency medicine                                                                                                                                                                                                                                                                                                                                                                                                                                                                                                                                                                                                                                                                                                                                    |
| Secondary Subject Heading:      | Geriatric medicine                                                                                                                                                                                                                                                                                                                                                                                                                                                                                                                                                                                                                                                                                                                                    |
| Keywords:                       | GERIATRIC MEDICINE, Organisation of health services < HEALTH SERVICES ADMINISTRATION & MANAGEMENT, ACCIDENT & EMERGENCY MEDICINE                                                                                                                                                                                                                                                                                                                                                                                                                                                                                                                                                                                                                      |

SCHOLARONE™  
Manuscripts

01.02.17

1  
2  
3  
4  
5  
6  
7  
8 A systematic review to identify and assess the effectiveness of alternatives for  
9  
10 people over the age of 65 who are at risk of potentially avoidable hospital admission.  
11  
12  
13

14  
15  
16 Alyson L Huntley\*  
17 Melanie Chalder<sup>1</sup>  
18 Alison Shaw<sup>1</sup>  
19 Will Hollingworth<sup>1</sup>  
20 Chris Metcalfe<sup>1,2</sup>  
21 Jonathan Bengner<sup>3,4</sup>  
22 Sarah Purdy<sup>1</sup>  
23  
24

25  
26 \*Corresponding author School of Social and Community Medicine, Centre for  
27 Academic Primary Care, University of Bristol, Canynge Hall, 39 Whatley Road Bristol  
28 BS8 2PS UK [alyson.huntley@bristol.ac.uk](mailto:alyson.huntley@bristol.ac.uk) Tel: 0117 9287257  
29

- 30  
31 1. School of Social and Community Medicine, Centre for Academic Primary  
32 Care, University of Bristol, Canynge Hall, 39 Whatley Road Bristol BS8 2PS  
33 UK  
34 2. Bristol Randomised Trials Collaboration University of Bristol, 39 Whatley  
35 Road, Bristol, BS8 2PS, UK  
36 3. Professor of Emergency Care, University of the West of England, Bristol, UK  
37 4. Consultant in Emergency Medicine, University Hospitals Bristol NHS  
38 Foundation Trust, UK  
39  
40  
41

42 **Word count 3998**  
43  
44  
45  
46

47 **Key words:** Systematic review, emergency medical services, aged,  
48 hospitalization, hospital alternative  
49  
50  
51  
52  
53  
54  
55  
56  
57  
58  
59  
60

01.02.17

## ABSTRACT

### Background / objectives

There are some older patients who are 'at the decision margin' of admission. This systematic review sought to explore this issue with the following objective: What admission alternatives are there for older patients and are they safe, effective and cost-effective? A secondary objective was to identify the characteristics of those older patients for whom the decision to admit to hospital may be unclear.

### Design

Systematic review of controlled studies (April 2005-December 2016). The protocol is registered at PROSPERO (CRD42015020371). Studies were assessed using the Cochrane risk of bias criteria, and relevant reviews were assessed with the AMSTAR tool. The results are presented narratively and discussed.

### Setting

Primary and secondary health care interface.

### Participants

People aged over 65 years at risk of an unplanned admission.

### Interventions

Any community-based intervention offered as an alternative to admission to an acute hospital

### Primary and secondary outcomes measures

01.02.17

Reduction in secondary care use, patient-related outcomes, safety and costs.

## Results

Nineteen studies and 7 systematic reviews were identified. These recruited patients with both specific conditions and mixed chronic and acute conditions. The interventions involved paramedic/emergency care practitioners (n=3), emergency department-based interventions (n=3), community hospitals (n=2), and hospital-at-home services (n=11). Data suggest that alternatives to admission appear safe with potential to reduce secondary care use and length of time receiving care. There is a lack of patient-related outcomes and cost data. The important features of older patients for whom the decision to admit is uncertain are: age over 75 years, co/multi-morbidities, dementia, home situation, social support and individual coping abilities.

## Conclusions

This systematic review describes and assesses evidence on alternatives to acute care for older patients and shows that many of the options available are safe and appear to reduce resource use. However, cost analyses and patient preference data is lacking.

01.02.17

## STRENGTHS AND LIMITATIONS OF THIS REVIEW

1. High quality systematic review of controlled studies.
2. Specific focus on admission avoidance interventions for acute care of older people.
3. Studies cover a wide range of acute conditions and acute exacerbation of chronic conditions in older people.
4. Some of the studies are pragmatic in approach and are at high risk of bias.
5. Most studies do not provide associated costs/cost analyses of interventions or patient preference data.

01.02.17

## Introduction

Reducing emergency bed days is one of the biggest challenges currently facing the National Health Service (NHS) in the United Kingdom. There is considerable pressure to reduce hospital admissions amongst older people.<sup>1</sup> It has been suggested that clinicians should: 'choose to admit only those frail older people who have evidence of underlying life-threatening illness or need for surgery'.<sup>2</sup> There has been a 65% increase in hospital admissions for those over 75 years of age in the last decade. Furthermore, people over 85 years of age now account for 11% of emergency admissions and 25% of critical care bed days.<sup>3</sup> Decisions to admit to an acute hospital are often influenced by inadequate knowledge of the patient or condition, communication difficulties between primary and secondary care, perceived benefits of in-patient care and patient preferences.<sup>4</sup> A review of urgent and emergency care by NHS England highlighted the need to identify those frail and elderly people who need care but do not have a medical need requiring hospital admission.<sup>3</sup> It is clear that there are some older patients for whom care in the community is safe, perhaps with the provision of additional services, and some for whom admission is required in order to deliver diagnostics or treatment that are only available in hospital. However, for those patients 'at the decision margin', the best path of action may be unclear.<sup>5</sup> The decision may be affected by non-clinical and clinical factors e.g. multi-morbidity, support at home or how much risk the patient or family are willing to accept.

Our specific objective was to conduct a systematic review to identify studies of community-based interventions aimed at reducing secondary care use in older patients with acute medical problems potentially requiring unscheduled hospital

01.02.17

admission. A secondary objective was to further confirm the characteristics of those older patients for whom the decision to admit to hospital may be unclear.

## Methods

### *Protocol and registration*

The protocol for the systematic review was registered at the PROSPERO register on 14/06/2015. Registration number is: CRD42015020371 (Supplementary material)

### *Eligibility criteria*

Publications of any randomised controlled trial (RCT) or controlled observational study (COS) that described people aged over 65 years, of either sex living in Organisation for Economic Co-operation and Development countries being considered for an unplanned admission were eligible for inclusion. The control was acute hospital admission. The studies had to include at least one of the following as either a primary or secondary outcome: intervention effectiveness, patient related outcomes, safety outcomes or healthcare costs, otherwise they were excluded.

### *Information sources and searches*

Medline, Medline In-Process, Embase, Cinahl and CENTRAL databases were searched from January 2005 to April 2015 inclusive using search terms based on the eligibility criteria. (Appendix 1) An update was run in December 2016 across Medline and Medline In-Process. We included any relevant systematic reviews published between 2010 and 2016. The decision to time limit the searches was based on the fact that the systematic reviews would cover any older studies and that any evidence not included in these two sources was unlikely to be relevant to the fast changing primary and secondary health care interface. The King's Fund and

01.02.17

1  
2  
3 Agency for Healthcare Research and Quality websites were also searched in April  
4  
5 2015.<sup>6,7</sup> The resulting references were managed using EndNote X6 software.  
6  
7 All references were screened by title and abstract followed by full text, both  
8  
9 independently and in duplicate (AH, BD), using predefined inclusion/exclusion  
10  
11 criteria. Any disagreements in either stage were resolved using a third reviewer  
12  
13 (SP). The reference lists of included studies were checked and forward referencing  
14  
15 was conducted using Google Scholar. Authors of included studies were contacted for  
16  
17 details of any extra studies.  
18  
19

### 20 21 22 ***Data items and collection process***

23  
24 Data from all primary studies (2005-2016) were extracted into a custom-designed  
25  
26 table. The main results and conclusions of recent high quality systematic reviews  
27  
28 (2010-2016) which included relevant primary studies were also recorded.  
29  
30

### 31 32 33 ***Assessment of risk of bias of individual studies (Appendix 2)***

34  
35 The Effective Practice and Organisation of Care Cochrane risk of bias tool was used  
36  
37 to critically appraise RCT or COS publications.<sup>8</sup>  
38  
39

### 40 41 42 ***Assessment of methodological quality of systematic reviews (AMSTAR)*** 43 44 ***(Appendix 3)***

45  
46 The AMSTAR checklist was used to assess the quality of the included systematic  
47  
48 reviews.<sup>9</sup>  
49  
50  
51  
52  
53  
54  
55  
56  
57  
58  
59  
60



01.02.17

### **Synthesis of results**

The data are presented narratively describing, if present, the most relevant systematic review and individual studies for each intervention and, where appropriate, for a specific condition.

In order to identify the characteristics of those older patients for whom the decision to admit to hospital may be unclear, the inclusion/exclusion criteria and demographics of the various studies' participants were examined and key features were tabulated alongside the number and references of relevant studies.

### **Results**

The systematic review identified four types of intervention from across 19 studies published in 24 individual papers: paramedic/emergency care practitioners (n=3), emergency department (ED) interventions (n=3), community hospitals (n=2), hospital-at-home services (n=11).<sup>10-33</sup> [Figure one](Appendix 4) Fifteen of the studies were conducted in western European countries of which four were in the UK. Two studies were conducted in Australia and two studies in the United States (US). Risk of bias, general intervention description, AMSTAR and study data are detailed in Appendices 2-5.

#### ***Paramedic practitioner/emergency care practitioner (PP/ECP) interventions***

Three studies were identified.<sup>10-12</sup> A cluster RCT (Mason 2007), compared PPs with additional training (n=1469) with standard PPs (n=1549) in assessing and treating elderly people following 999 calls with the aim of measuring subsequent emergency care.<sup>10</sup> Similarly, two more recent COS investigated the role of ECPs in avoiding ED) attendance/admissions in elderly populations.<sup>11, 12</sup> Gray 2008 was a case-series

01.02.17

1  
2  
3 study of ECP attendances for elderly patients aged over 65 years with a fall (n=233)  
4  
5 compared with historical controls (n=772), and Mason 2012 was a cluster controlled  
6  
7 study of enhanced ECP care for five care homes (n=256) compared with standard  
8  
9 care in five other care homes (n=201). Risk of bias was low for all the domains of the  
10  
11 cluster RCT and both of the COS were at high risk due to lack of randomisation.  
12

13  
14 In the cluster RCT, all primary outcomes comparing the intervention with the control  
15  
16 group were improved: relative risk of ED attendance within 28 days (RR 0.72 (0.68,  
17  
18 0.75)), relative risk of hospital admission within 28 days (RR 0.87 (0.81, 0.94)), being  
19  
20 very satisfied with care (RR 1.16 (1.09, 1.23)) and mean total episode duration in  
21  
22 hours (-42.2 (-59.5,-25.0)) with a reported  $p < 0.001$  for all.<sup>10</sup> The secondary outcome  
23  
24 of mortality was comparable between groups, but intervention patients had a greater  
25  
26 number of subsequent unplanned contacts with secondary care at 28 days (330 vs.  
27  
28 259  $p < 0.01$ ).

29  
30  
31 The two COS reported a greater reduction in admissions when comparing the  
32  
33 intervention with normal ECP practice but these results are of limited use due to the  
34  
35 high risk of bias of the studies.<sup>11, 12</sup>

36  
37  
38 None of the studies of PP/ECP interventions provided details of cost data or cost-  
39  
40 effectiveness analysis.  
41  
42  
43  
44

### 45 ***Emergency department (ED) interventions***

46  
47  
48  
49 The searches identified one RCT (Sun 2014) which was assessed to be at low risk of  
50  
51 bias, and two COS (Benaiges 2014, Salvi 2008) in which the risk of bias was high for  
52  
53 several domains including randomisation.<sup>13-15</sup>  
54  
55  
56  
57  
58  
59  
60

01.02.17

1  
2  
3 Sun and colleagues conducted a RCT in which patients attending ED with syncope  
4 were randomised to receive either a syncope protocol in an observation unit (n=62)  
5 or usual care (n=62).<sup>13</sup> where the maximum stay in the observation unit could not  
6 exceed than 24 hours.  
7  
8  
9

10  
11  
12  
13  
14 In terms of primary outcomes, patients randomised to the intervention spent less  
15 time in hospital at the index visit (29 vs. 47 hours p<0.001) and were less likely to be  
16 admitted to hospital (RR 0.16 (95% CI 0.09, 0.29) p<0.001). There were no  
17 differences in the secondary outcomes of serious events, quality of life (QoL) or  
18 satisfaction with care between groups. A reduction in costs was reported but no  
19 formal statistical comparison was performed (index visit US\$1400 vs. 2420, 30 days  
20 US\$1800 vs.2520 (2011 data)).  
21  
22  
23  
24  
25  
26  
27  
28  
29

30  
31  
32 The first of the two COS compared usual care with treatment in a 'day hospital' for  
33 hyperglycaemic crisis from which the main result was improved readmission rates  
34 and associated costs (Benaiges 2014), whilst the second COS compared a specialist  
35 geriatric ED intervention with a standard ED procedure (Salvi 2008) but without  
36 evidence of any differences in outcome and had significant differences in baseline  
37 demographic data.<sup>14,15</sup>  
38  
39  
40  
41  
42  
43  
44  
45

### 46 **Community hospital (CH) interventions**

47  
48  
49 Two RCTs were identified describing a community hospital (CH) intervention as an  
50 alternative to acute hospital (AH) care.<sup>16-19</sup> Both RCTs were at low risk of bias  
51 overall. In the RCT by Vicente, participants were randomised following triage at  
52 home to either go to a CH (n=410) or to the ED (n=396).<sup>16</sup> The data presented were  
53 limited. The authors reported that the nurse attending the patient at home sent 90  
54  
55  
56  
57  
58  
59  
60

01.02.17

1  
2  
3 intervention participants to the CH (primary outcome) although six of those  
4  
5 individuals were subsequently transferred from the CH to the ED (secondary  
6  
7 outcome). There were no formal statistical analyses nor were cost data presented.  
8  
9

10  
11 The Garåsen RCT compared CH care (n=72) to AH care (n=72) and was published  
12  
13 over three separate papers.<sup>17-19</sup> There was no distinction between primary and  
14  
15 secondary outcomes. At 26 weeks, there were fewer readmissions in the CH group  
16  
17 versus the AH group (19% vs. 36%, p=0.02) and more people receiving no care  
18  
19 (25% vs. 10%, p=0.01). At 12 months, there were fewer deaths in the CH group  
20  
21 (18% vs. 31%, p=0.03) although the observation period was considerably longer in  
22  
23 the CH group (335.7 vs. 292.8 days, p=0.01). Total cost of treatment was less in the  
24  
25 CH group compared with those receiving AH care NOK 39,650 ((95% CI kr 30 996-  
26  
27 48,304) versus NOK 73,417 (95% CI NOK 52 992-93,843)) data collected 2003-  
28  
29 2005 (p = 0.002). Average health services costs per patient/day for the entire  
30  
31 observation period was NOK 606 (95% CI £ 450- 761) in the CH group compared to  
32  
33 NOK 802 (95% CI NOK 641-962) in the AH group (p = 0.026).  
34  
35  
36  
37

### 38 ***Hospital-at-Home (HaH) interventions***

39  
40 Eight of the HaH studies were focused on specific conditions: heart failure (n=3),  
41  
42 chronic obstructive pulmonary disease (n=1), pulmonary embolism (n=1), pneumonia  
43  
44 (n=1), stroke (n=1), and uncomplicated diverticulitis (n=1).<sup>20-28</sup> The remaining three  
45  
46 HaH studies recruited older participants with a range of conditions, and two of these  
47  
48 recruited from residential homes and were not included in recent high quality  
49  
50 systematic reviews.<sup>29-33</sup> All the specific condition studies were included in recent  
51  
52 (2010-2016) systematic reviews.<sup>34-40</sup>  
53  
54  
55  
56  
57  
58  
59  
60

01.02.17

### *Heart failure (HF)*

Three RCTs were identified on HaH for HF and their results published in four separate papers.<sup>20-23</sup> These studies were included in two previous reviews of HaH one which focused on HF (Quaddoura 2015).<sup>34,35</sup> This review used the Cochrane risk of bias tool and described the overall quality of the RCTs as modest. The AMSTAR rating of the review highlighted a lack of description of excluded studies and the combination of different QoL measures in meta-analysis.

The patients were randomised to either HaH or AH within the ED and the primary outcomes of the review were hospital readmissions and mortality. HaH increased time to first readmission (mean difference (MD) 14.13 days [95% CI 10.36, 17.91]  $p=0.015$  using data from two RCTs ( $n=132$ ).<sup>22-23</sup> although there was no strong evidence of an effect on the rate of readmission (RR 0.68 [0.42, 1.09]) using data from two RCTs ( $n=172$ ).<sup>20,22</sup> This is a sizeable reduction, but consistent with chance in a data set of this size. An improvement was reported in health-related QoL at both 6 and 12 months (standardized MD (SMD) -0.31 [-0.45 to -0.18]; SMD -0.17 [-0.31 to -0.02] respectively). HaH was comparable to AH care on all-cause mortality (RR 0.94 (0.67, 1.32)) using data from all three RCTs. These studies also showed a significant reduction in costs for the index treatment period ( $p<0.001$ ). Two trials<sup>20,23</sup> reported lower costs in the HaH group at 12 months, although the difference was not statistically significant in one of the studies.<sup>20</sup> When the authors of this particular review calculated total costs for these two trials, both indicated a cost reduction for HaH compared to AH care.

### *Chronic obstructive pulmonary disease (COPD)*

An RCT by Ricauda was published in 2008 and was also included in two recent systematic reviews - one focusing on COPD and one more generally on HaH.<sup>24,35,36</sup>

01.02.17

1  
2  
3 The high quality COPD review included eight RCTs, one of which described HaH in  
4 an early discharge setting, plus the Ricauda trial and six which were published prior  
5 to our 2005 inclusion date.  
6  
7

8  
9 The Ricauda RCT compared HaH (n=52) with AH (n=52) and was conducted with  
10 low risk of bias. The primary outcomes were hospital readmission and mortality  
11 rates at 6 months. The secondary outcomes included a range of depression,  
12 functional, cognitive and nutritional measures as well as costs.  
13  
14  
15  
16  
17

18  
19 The study showed that there were fewer hospital readmissions for HaH patients  
20 compared to AH patients at 6 months (42% vs 87%, p=0.001) although HaH patients  
21 had a longer length of stay than those in the AH group (15.5 SD±9.5 vs 11.0 ±SD 7.9  
22 days, p=0.01). Whilst HaH patients experienced improvements in depression and  
23 QoL scores during the study, there was no evidence of difference between the two  
24 groups for these outcomes at 6 months. Cumulative mortality at 6 months was  
25 comparable between groups (20.2%).  
26  
27  
28  
29  
30  
31  
32  
33

34  
35 All patients discharged from HaH completed the care programme at home, whereas  
36 11.5% of AH patients continued their care in a long-term facility after hospital  
37 discharge, with an average daily cost of \$174.7 for a mean period of 25 ±8.7 days.  
38  
39

40  
41 Overall - on a cost per patient per day basis - HaH care was less expensive than that  
42 given to the AH group (\$101.4 ± 61.3 vs \$151.7 ±96.4, p=0.002). This RCT reflected  
43 the results of the previously published systematic review.<sup>36</sup>  
44  
45  
46  
47  
48  
49

### 50 *Pulmonary embolism*

51  
52 Our review identified one published COS of HaH (Rodriguez-Cerillo 2009) for  
53 patients with pulmonary embolism which was also included in a recent systematic  
54  
55  
56  
57  
58  
59  
60

01.02.17

1  
2  
3 review with seven other observational studies (Vinson 2012).<sup>25,37</sup> The high quality  
4  
5 review concluded that the overall incidence of mortality at 90 days was very low.  
6  
7

8  
9  
10 The COS compared HaH (n=30) with AH (n=31) and was at high risk of bias  
11  
12 overall.<sup>25</sup> No distinctions between primary and secondary outcomes were made.  
13  
14 Mean length of stay was not statistically different comparing HaH with the AH group  
15  
16 (8.9 days (7–14 days) vs. 10.6 days (6–20 days)). No patients treated at home  
17  
18 required unexpected return to hospital during admission. There was no major  
19  
20 bleeding, thrombosis or death in either group at 90 days in the COS.<sup>25</sup> There were  
21  
22 no cost data reported.  
23  
24

### 25 26 *Pneumonia*

27  
28  
29 Our review identified one RCT (Carratala 2005) published and included in a recent  
30  
31 systematic review (Chalmers 2011) which also described a further five studies  
32  
33 comprising a variety of designs).<sup>26,38</sup> The RCT compared HAH (n=110) with AH  
34  
35 (n=114) and was at low risk of bias. The primary outcome was the percentage of  
36  
37 patients with an 'overall successful outcome' according to seven predefined criteria<sup>26</sup>  
38  
39 whilst secondary outcomes were patients' QoL and satisfaction.  
40  
41

42  
43 An overall successful outcome was achieved in 83.6% of HaH patients and 80.7% of  
44  
45 AH patients (absolute difference 2.9% [95% CI, 7.1-12.9]). Subsequent hospital  
46  
47 admissions were comparable between groups (6.3 vs. 7.0%). More HaH patients  
48  
49 were satisfied with their overall care (91.2 vs. 79.1%; ab 12.1% [CI, 1.8 to 22.5%]).  
50  
51 Reported QoL scores were comparable between groups as was the percentage of  
52  
53 patients with adverse drug reactions (9.1 vs. 9.6%), medical complications (0.9 vs.  
54  
55 2.6%), and overall mortality (0.9 vs. 0%) for HAH and AH patient groups  
56  
57  
58  
59  
60

01.02.17

1  
2  
3 respectively. There were no cost data presented. This RCT data reflects the result of  
4  
5 the systematic review by Chalmers 2011.<sup>38</sup>  
6  
7

### 8 9 *Stroke*

10  
11 One RCT on HaH for stroke patients (Kalra 2005) was published and also included  
12  
13 in two previous systematic reviews.<sup>27,35,39</sup> This RCT was at low risk of bias. The  
14  
15 primary outcome measure was death or institutionalisation at one year. This three-  
16  
17 arm study randomised patients into care on a stroke unit (SU) (n=152), care in a  
18  
19 general ward (GW) with stroke expert advice (n=152) and HaH with stroke expert  
20  
21 advice (n=153) within 72 hours after recruitment in the ED department.  
22  
23

24  
25 Mortality and institutionalisation at one year were lower in the SU group compared  
26  
27 with either the GW (14 vs. 30%,  $p < 0.001$ ) or HaH groups (14 vs. 24%,  $p=0.03$ ).  
28

29  
30 Significantly fewer patients cared for on the SU died compared with those in the GW  
31  
32 group (9 vs. 23%,  $p = 0.001$ ). The SU group showed greater improvement on basic  
33  
34 activities of daily living compared with the other two groups (change in Barthel Index  
35  
36 10 vs. 7,  $p < 0.002$ ). QoL at three months was significantly better in SU and HaH  
37  
38 patients. There was greater dissatisfaction with care in the GW group compared with  
39  
40 SU or HaH groups. The total costs of stroke care per patient over 12 months (data  
41  
42 collected 2005-2008) were £11,450 for the SU group, £9527 for GW group and  
43  
44 £6840 for HaH group.  
45  
46

### 47 48 *Uncomplicated diverticulitis*

49  
50 Our systematic review found one COS (Rodriguez-Cerrillo 2013).<sup>28</sup> This study was  
51  
52 also included in a recent, moderate quality integrative review on admission-  
53  
54 avoidance HaH services.<sup>40</sup> This COS compared HaH (n=34) with AH (n=18) for  
55  
56 patients with uncomplicated diverticulitis and was, overall, at high risk of bias with no  
57  
58  
59  
60



01.02.17

1  
2  
3 defined primary or secondary outcomes were defined. No statistical detail was  
4  
5 provided about any of the data presented. None of the patients treated at home were  
6  
7 transferred to the acute hospital. The mean length of stay in the intervention group  
8  
9 was 9 days, compared with 10 days in AH. HaH treatment was associated with a  
10  
11 cost reduction of €1368 per patient.  
12

### 13 14 15 *Older population with acute medical problems* 16

17  
18 One COS recruited acutely ill older persons and was published across three  
19  
20 separate papers (Leff 2005, main publication).<sup>29-31</sup> This COS compared HaH (n=169)  
21  
22 with AH (n=286) with the majority of patients being identified the morning after  
23  
24 admission. The study was at high risk of bias.<sup>29</sup> There was no distinction made  
25  
26 between primary and secondary outcomes. Patients treated with HaH had a shorter  
27  
28 length of stay compared with those given AH care (3.2 vs. 4.9 days, p =0.004). The  
29  
30 mean treatment cost was lower for HaH care than for acute hospital care (\$5081 vs.  
31  
32 \$7480, p< 0.001). Eight weeks after admission, there were no differences in the use  
33  
34 of health services between HaH and AH patients in terms of ED visits, (0.23 (SD  
35  
36 0.66) 0.22 (SD 0.57)) or readmission (0.28 (SD 0.59) 0.27 (SD 0.55)).  
37  
38  
39  
40  
41

42 The COS by Crilly 2010 recruited elderly nursing home patients presenting at ED but  
43  
44 who were willing to receive care back in their nursing home (n=62) and compared  
45  
46 these with historical control care home patients who had been hospitalised (n=115).  
47  
48

49 The study was at high risk of bias<sup>32</sup> and no primary outcomes were specified.

50  
51 Intervention participants experienced a longer time in ED than those who had been  
52  
53 admitted into hospital (9.94 vs. 7.01 hours p=0.005) but required less time being  
54  
55 subsequently cared for (2.19 vs. 6.2 days p<0.001). Overall, the length of an episode  
56  
57 of care in days (9.56 (1.26) vs. 6.20 (0.59) days, p=0.14) and the number of  
58  
59  
60

01.02.17

1  
2  
3 readmissions within 28 days (11.3 vs. 11.3,  $p=0.99$ ) were not statistically different  
4  
5 between the two groups. There were no mortality or cost data presented.  
6  
7

8 The COS by Lau 2013 assessed residents of a care home presenting at ED who  
9  
10 were subsequently treated back in their care home ( $n=95$ ) and compared data with  
11  
12 historical hospital controls (not from care homes) ( $n=167$ ).<sup>33</sup> No primary outcomes  
13  
14 were specified and the study was at high risk of bias. Length of stay was significantly  
15  
16 shorter for those in the intervention group compared with the controls (2.0 vs. 11.0  
17  
18 days  $p<0.001$ ) although mortality (11 (11.6%) vs. 20 (12.0%),  $p=0.924$ ) and  
19  
20 readmission rates (39 (41.1%) vs. 68 (40.7%),  $p=0.963$ ) at 6 months were  
21  
22 comparable between groups. There were no cost data presented.  
23  
24

25  
26  
27 ***Characteristics of those older patients for whom the decision to admit to***  
28  
29 ***hospital may be unclear*** (Appendix 6)  
30

31  
32 Fifteen of the studies included in our systematic review recruited a population with a  
33  
34 mean age of more than 75 years, despite the inclusion criterion specifying those over  
35  
36 65 years. Whilst 9/19 studies specifically stated their recruited population was multi-  
37  
38 morbid, it is plausible that all the study populations were and so this is very likely to  
39  
40 be a factor which impacts on decision-making in acute medical care. Eight studies  
41  
42 specified a particular degree of severity for dementia as an inclusion criterion but, in  
43  
44 practice, this is a difficult assessment to make in the acute care context. There were  
45  
46 inclusion/exclusion criteria in nine of the studies which specified the importance  
47  
48 taking account of an individual's home situation, social support networks and coping  
49  
50 abilities as part of the decision-making process.  
51  
52  
53  
54  
55  
56  
57  
58  
59  
60

01.02.17

## Discussion

The findings of our systematic review show that alternatives to acute hospital care at the point of potential admission for people aged over 65 years can be safe, with comparable mortality and clinical outcomes across a range of acute and chronic conditions. They also have the potential to reduce healthcare spending. The key features of older patients for whom the decision to admit may be uncertain are age more than 75 years, co/multi-morbidities, dementia, home situation, social support and individual coping abilities.

Our systematic review was conducted to high methodological standards.<sup>41</sup> The majority of evidence presented is based on HaH services, although this includes treatment of a wide range of conditions. Whilst not all the included studies were randomised or considered to be at low risk of bias, these issues are clearly highlighted and the included studies cover a variety of alternative approaches to hospital admission. The majority of the included studies offer little or no cost data which makes it difficult to assess the cost-effectiveness of any these alternatives to acute hospital care.

As part of our systematic review, any relevant systematic review published in 2010-2016 was included and referred to when discussing the more recent studies. All of these reviews were on the topic of HaH interventions. In addition to being older evidence, some of the previous reviews in contrast to our own included a number of uncontrolled observational studies. Some also included studies in which HaH interventions were applied in the non-emergency or post-discharge settings. By contrast, our systematic review focuses on bringing together controlled studies on

01.02.17

1  
2  
3 alternatives to acute hospitalisation at the point of potential admission for the over  
4  
5 65s. The exception to the evidence of benefit of HaH is the treatment of stroke  
6  
7 patients, who fare much worse with HaH intervention compared to treatment in a  
8  
9 stroke unit. The authors of this study suggest that these differences are due to the  
10  
11 overall expertise available in the stroke unit as opposed to care given by generic  
12  
13 hospital or homecare staff advised by specialised stroke health professionals. It is  
14  
15 recommended therefore that in most cases, in line with current NHS practice for  
16  
17 stroke, care should to be provided in specialist units.<sup>42</sup>  
18  
19

20  
21 In terms of health professionals, making a decision to admit an older patient can be  
22  
23 difficult. Decision-making for different of patients draws upon a range of professional  
24  
25 experience and expertise and should also be influenced by broader factors such as  
26  
27 living conditions and individual/family/carer coping in addition to care preferences. If  
28  
29 alternatives to acute admission are available, health professionals have to be  
30  
31 confident about these alternative pathways for their patients.<sup>5</sup> Whilst many of the  
32  
33 interventions in this review may provide viable alternatives to acute care, they may  
34  
35 not exist in some healthcare communities or geographical regions. Furthermore,  
36  
37 commissioners of health and social care services require comprehensive evidence of  
38  
39 both effectiveness and cost effectiveness of any hospital alternatives as well as  
40  
41 adequate resources in order to commission them.  
42  
43  
44  
45

46  
47 Although our systematic review offered new evidence on several aspects of acute  
48  
49 care provision for older patients, there are still many issues to take forward into  
50  
51 future research. These include consideration of the wide range of interventions to be  
52  
53 delivered, the variety of conditions to be treated, the generation of data to allow cost-  
54  
55 comparisons with acute hospital admission, patient and family/carer acceptability,  
56  
57  
58  
59  
60

01.02.17

health professional acceptability, and the commissioning and resourcing of new services.

For peer review only

01.02.17

## Funding statement

This paper presents research funded by the National Institute for Health Research (NIHR) as part of their Programme Development Grant scheme (RP-DG-1213-10004). The views expressed are those of the authors and not necessarily those of the NHS, the NIHR or the Department of Health.

## Competing interests

None of the authors have any competing interests to declare

## Acknowledgements

Ben Davies (BD) for systematic review support

Helen England Formerly of Bris-DOC

Sue Jenkins Lay representative who co-led a PPI session with MC, to explore relevance of findings of systematic review with a group of older lay representatives.

Lay representatives: Alma Brooks, Matt Pepper, Joan Pepper, Tom Doyle, and Liz Banks- Jones

## Authors' contribution

**ALH** Lead systematic reviewer conducting all stages of the review and was responsible for the initial draft of paper.

**MC** Protocol of systematic review is based on outline from NIHR Programme Development Grant in which MC had a significant role. Specific expertise in Patient and Public Involvement. Contributing to discussion as the review progressed. Commenting and editing on the drafts of the paper.

01.02.17

1  
2  
3 **AH** Specific expertise in patient-related outcomes. Contributing to discussion as the  
4 review progressed. Commenting and editing on the drafts of the paper.  
5  
6

7  
8 **WH** Specific expertise in health economics. Contributing to discussion as the review  
9 progressed. Commenting and editing on the drafts of the paper.  
10  
11

12  
13 **CM** Specific expertise in trial design and statistical analysis. Contributing to  
14 discussion as the review progressed. Commenting and editing on the drafts of the  
15 paper.  
16  
17  
18

19  
20  
21 **JB** Professor of Emergency Care. Contributing to discussion as the review  
22 progressed. Commenting and editing on the drafts of the paper.  
23  
24

25  
26 **SP** Principal Investigator. Professor of Primary Health Care. Third reviewer of data.  
27 Commenting and editing on the drafts of the paper  
28  
29  
30  
31  
32  
33  
34  
35  
36  
37  
38  
39  
40  
41  
42  
43  
44  
45  
46  
47  
48  
49  
50  
51  
52  
53  
54  
55  
56  
57  
58  
59  
60

01.02.17

## REFERENCES

1. D'Souza S, Gupta S. Preventing admission of older people to hospital. *BMJ* 2013 May 20; 346: f3186
2. Philp I. Community services. Reasons for redesigning care for older people. *Health Serv J* 2012; 122(6331):30-2.
3. NHS England, 2013. Bed availability and occupancy accessed at: <https://www.england.nhs.uk/statistics/statistical-work-areas/bed-availability-and-occupancy/> on 20/12/16
4. Hammond CL, Pinnington LL, Phillips MF. A qualitative examination of inappropriate hospital admissions and lengths of stay. *BMC Health Serv Res* 2009; 9:44.
5. Walsh B, Lattimer V, Wintrup J *et al*. Professional perspectives on systemic barriers to admission avoidance: learning from a system dynamics study of older people's admission pathways. *Internat J Older People Nursing* 2015; 10(2):105-14.
6. The King's Fund, accessed at: <https://www.kingsfund.org.uk/> on the 18/01/2017
7. AHRQ, accessed at: <http://www.ahrq.gov/> on the 18/01/2017
8. EPOC risk of bias criteria accessed at: <http://epoc.cochrane.org/sites/epoc.cochrane.org/files/public/uploads/Suggested%20risk%20of%20bias%20criteria%20for%20EPOC%20reviews.pdf> on 18/01/17
9. Shea BJ, Grimshaw JM, Wells GA *et al*. Development of AMSTAR: a measurement tool to assess the methodological quality of systematic reviews. *BMC Med Res Methodol* 2007; 7:10.
10. Mason S, Knowles E, Colwell B *et al*. Effectiveness of paramedic practitioners in attending 999 calls from elderly people in the community a cluster randomised controlled trial. *BMJ* 2007 Nov 3; 335(7626):919.
11. Gray JT, Walker A. Avoiding admissions from the ambulance service: a review of elderly patients with falls and patients with breathing difficulties seen by emergency care practitioners in South Yorkshire. *Emerg Med J* 2008; 25(3):168-71.



01.02.17

12. Mason S, O'Keeffe C, Knowles E *et al*. A pragmatic quasi experimental multi-site community intervention trial evaluating the impact of Emergency Care Practitioners in different UK health settings on patient pathways (NEECaP Trial) . *Emerg Med J* 2012; 29(1):47-53.
13. Sun BC, McCreath H, Liang LJ *et al*. Randomized clinical trial of an emergency department observation syncope protocol versus routine inpatient admission. *Ann Emerg Med* 2014; 64(2):167-75.
14. Benaiges D, Chillarón JJ, Carrera MJ *et al*. Efficacy of treatment for hyperglycemic crisis in elderly diabetic patients in a day hospital. *Clin Interv Aging* 2014; 9:843-9.
15. Salvi F, Morichi V, Grilli A *et al*. A geriatric emergency service for acutely ill elderly patients: pattern of use and comparison with a conventional emergency department in Italy. *J Am Geriatr Soc*. 2008 56(11):2131-8.
16. Vicente V, Svensson L, Wireklint Sundström B *et al*. Randomized controlled trial of a prehospital decision system by emergency medical services to ensure optimal treatment for older adults in Sweden. *J Am Geriatr Soc* 2014; 62(7):1281-7
17. Garåsen H, Windspoll R, Johnsen R. Intermediate care at a community hospital as an alternative to prolonged general hospital care for elderly patients: a randomised controlled trial. *BMC Public Health* 2007 May 2; 7:68. **Main publication**
18. Garåsen H Magnussen J Windspoll R *et al*. Elderly patients in hospitals or nursing homes in intermediæravdeling - A cost analysis. *Tidsskr Nor Lægeforen* 2008a; 128: 283-5 (Danish)
19. Garåsen H, Windspoll R, Johnsen R. Long term patients' outcomes after intermediate care at a community hospital for elderly patients: 12-month follow-up of a randomized controlled trial. *Scand J Public Health* 2008b; 36(2):197-204.
20. Mendoza H, Martín MJ, García A *et al*. Hospital at home care model as an effective alternative in the management of decompensated chronic heart failure. *Eur J Heart Fail* 2009; 11(12):1208-13. **main publication**
21. García-Soleto A, Parraza-Diez N, Aizpuru-Barandiaran F *et al*. Comparative study of quality of life after hospital-at-home or in-patient admission for acute decompensation of chronic heart failure. *World Journal of Cardiovascular Diseases* 2013; 3; 174-181.

01.02.17

- 1  
2  
3  
4 22. Tibaldi V, Isaia G, Scarafiotti C *et al.* Hospital at home for elderly patients with  
5 acute decompensation of chronic heart failure: a prospective randomized  
6 controlled trial. *Arch Intern Med* 2009; 169(17):1569-75.  
7  
8  
9 23. Patel H, Shafazand M, Ekman I *et al.* Home care as an option in worsening  
10 chronic heart failure- a pilot study to evaluate feasibility, quality adjusted  
11 life years and cost-effectiveness. *Eur J Heart Fail* 2008; 10(7):675-81.  
12  
13 24. Ricauda Aimonino N, Tibaldi V, Leff B *et al.* Substitutive "hospital at home"  
14 versus inpatient care for elderly patients with exacerbations of chronic  
15 obstructive pulmonary disease: a prospective randomized, controlled trial. *J Am*  
16 *Geriatr Soc* 2008; 56(3):493-500.  
17  
18 25. Rodríguez-Cerrillo M, Alvarez-Arcaya A, Fernández-Díaz E *et al.* A prospective  
19 study of the management of non-massive pulmonary embolism in the home.  
20 *Eur J Intern Med* 2009; 20(6):598-600.  
21  
22 26. Carratalà J, Fernández-Sabé N, Ortega L *et al.* Outpatient care compared with  
23 hospitalization for community-acquired pneumonia: a randomized trial in low-  
24 risk patients. *Ann Intern Med* 2005; 142(3):165-72.  
25  
26 27. Kalra L, Evans A, Perez I *et al.* A randomised controlled comparison of  
27 alternative strategies in stroke care. *Health Technol Assess* 2005; 9(18): iii-iv,  
28 1-79.  
29  
30 28. Rodríguez-Cerrillo M, Poza-Montoro A, Fernandez-Diaz E *et al.* Treatment of  
31 elderly patients with uncomplicated diverticulitis, even with comorbidity,  
32 at home. *Eur J Intern Med* 2013; 24(5):430-2.  
33  
34 29. Leff B, Burton L, Mader SL *et al.* Hospital at home: feasibility and outcomes of a  
35 program to provide hospital-level care at home for acutely ill older patients. *Ann*  
36 *Intern Med* 2005; 143(11):798-808. **main publication**  
37  
38 30. Leff B, Burton L, Mader SL *et al.* Comparison of functional outcomes  
39 associated with hospital at home care and traditional acute hospital care. *J Am*  
40 *Geriatr Soc* 2009; 57(2):273 -8.  
41  
42 31. Frick KD, Burton LC, Clark R *et al.* Substitutive Hospital at Home for older  
43 persons: effects on costs. *Am J Manag Care* 2009; 15(1):49-56.  
44  
45 32. Crilly J, Chaboyer W, Wallis M *et al.* An outcomes evaluation of an Australian  
46 Hospital in the Nursing Home admission avoidance programme. *J Clin Nurs*  
47 2011; 20(7-8):1178-87.  
48  
49  
50  
51  
52  
53  
54  
55  
56  
57  
58  
59  
60

01.02.17

- 1  
2  
3  
4  
5  
6  
7  
8  
9  
10  
11  
12  
13  
14  
15  
16  
17  
18  
19  
20  
21  
22  
23  
24  
25  
26  
27  
28  
29  
30  
31  
32  
33  
34  
35  
36  
37  
38  
39  
40  
41  
42  
43  
44  
45  
46  
47  
48  
49  
50  
51  
52  
53  
54  
55  
56  
57  
58  
59  
60
33. Lau L, Chong CP, Lim WK. Hospital treatment in residential care facilities is a viable alternative to hospital admission for selected patients. *Geriatr Gerontol Int* 2013; 13(2):378-83.
  34. Qaddoura A, Yazdan-Ashoori P, Kabali C *et al*. Efficacy of Hospital at home in patients with Heart Failure: A Systematic Review and Meta-Analysis. *PLoS One* 2015; 10(6):e0129282.
  35. Shepperd S, Iliffe S, Doll HA, Clarke MJ, Kalra L, Wilson AD, Gonçalves-Bradley DC. Admission avoidance hospital at home. *Cochrane Database Syst Rev*. 2016 Sep 1; 9:CD007491.
  36. Jeppesen E, Brurberg KG, Vist GE *et al*. Hospital at home for acute exacerbations of chronic obstructive pulmonary disease. *Cochrane Database Syst Rev* 2012; 5:CD003573.
  37. Vinson DR, Zehtabchi S, Yealy DM. Can selected patients with newly diagnosed pulmonary embolism be safely treated without hospitalization? A systematic review. *Ann Emerg Med* 2012; 60(5):651-662.
  38. Chalmers JD, Akram AR, Hill AT. Increasing outpatient treatment of mild community-acquired pneumonia: systematic review and meta-analysis. *Eur Respir J* 2011; 37(4):858-64.
  39. Caplan GA. A meta-analysis of "hospital in the home". *Med J Aust* 2013; 198(4):195-6.
  40. Varney J, Weiland, TJ, Jelinek G. Efficacy of hospital in the home services providing care for patients admitted from emergency departments: an integrative review. *Internat J Evidence-Based Healthcare* 2014; 12(2): 128–141.
  41. Higgins JPT, Green S (editors). *Cochrane Handbook for Systematic Reviews of Interventions* Version 5.1.0 [updated March 2011]. The Cochrane Collaboration, 2011.
  42. NICE pathway for stroke accessed at <https://pathways.nice.org.uk/pathways/stroke> on 20/12/16

Figure 1 - PRISMA flow diagram searches

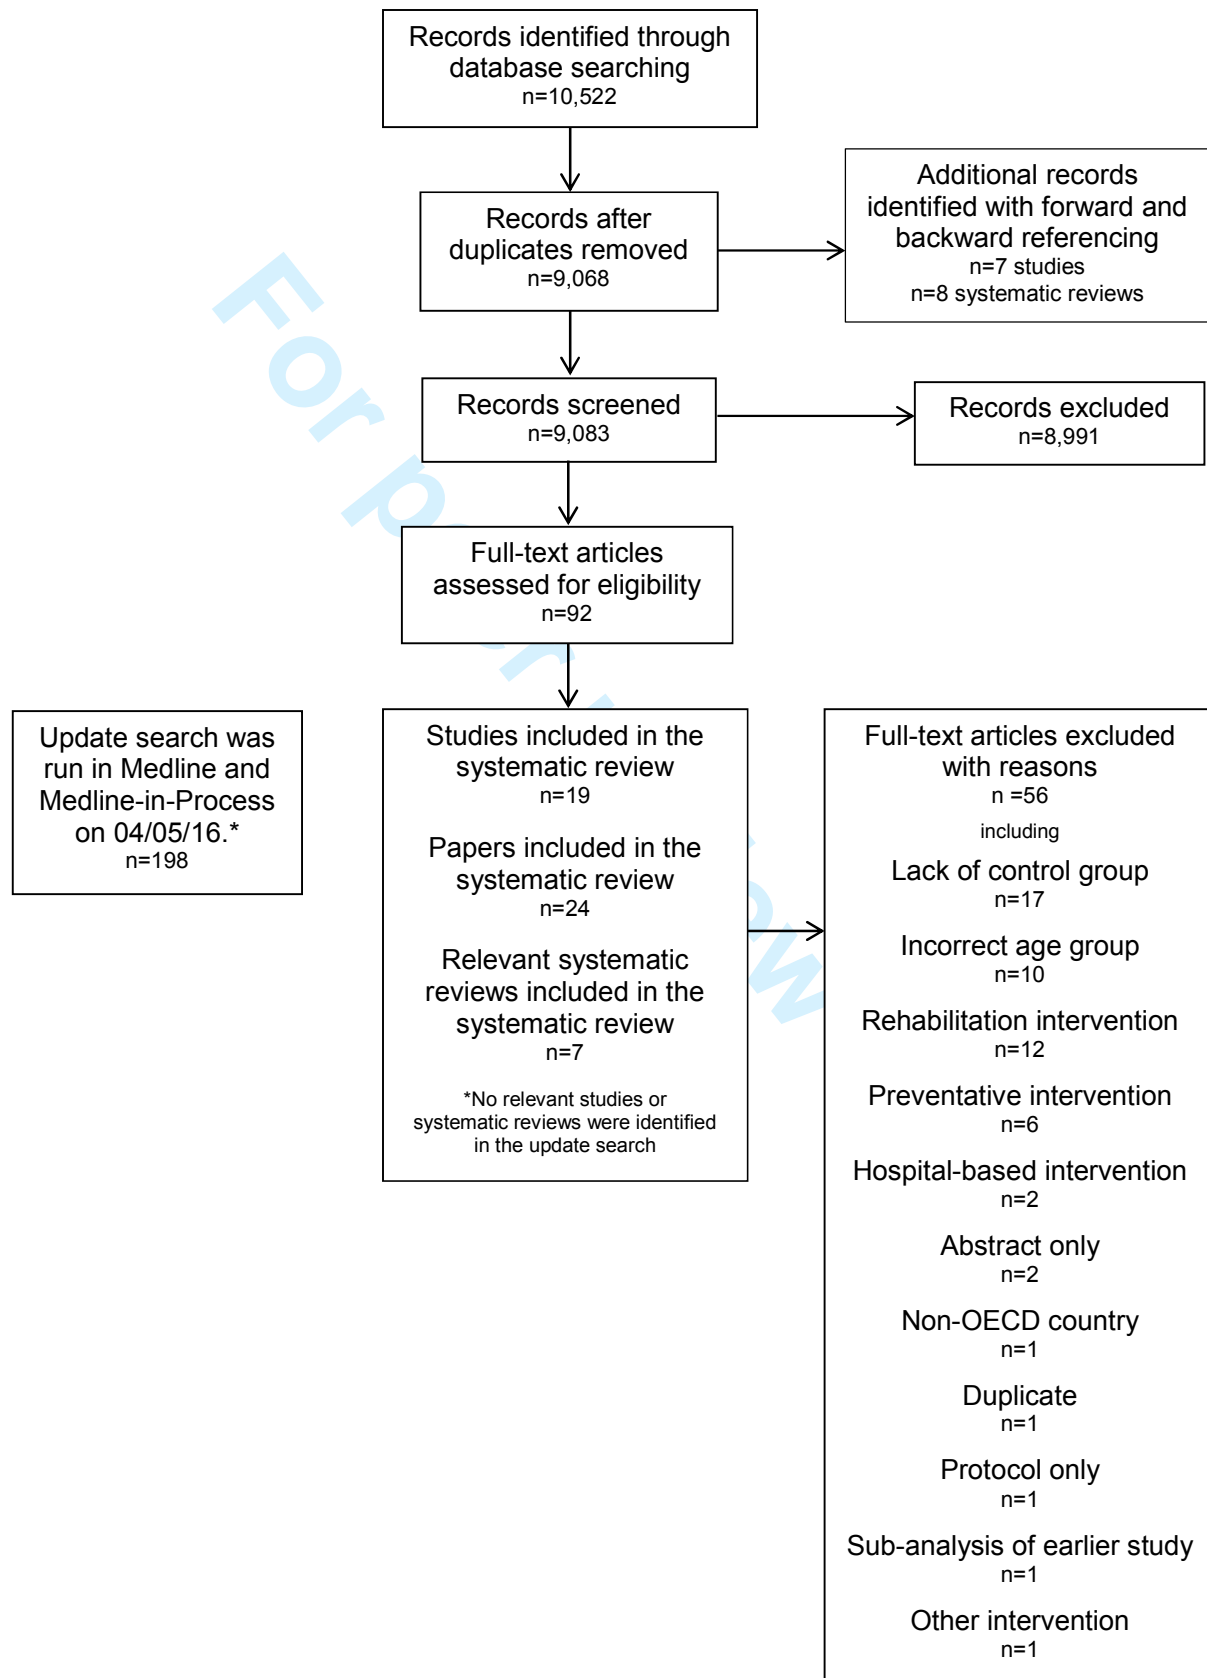

## Appendix 1: Parent search strategy run in Medline

Database: Medline In-process - current week, Medline 1950 to present

Search Strategy: Run April 24<sup>th</sup> 2015

- 1 intervention?.ti. or (intervention? adj6 (clinician? or collaborat\$ or community or complex or DESIGN\$ or doctor? or educational or family doctor? or family physician? or family practitioner? or financial or GP or general practice? or hospital? or impact? or improv\$ or individuali?e? or individuali?ing or interdisciplin\$ or multicomponent or multi-component or multidisciplin\$ or multidisciplin\$ or multifacet\$ or multi-facet\$ or multimodal\$ or multi-modal\$ or personali?e? or personali?ing or pharmacies or pharmacist? or pharmacy or physician? or practitioner? or prescrib\$ or prescription? or primary care or professional\$ or provider? or regulatory or regulatory or tailor\$ or target\$ or team\$ or usual care)).ab. (178760)
- 2 (pre-intervention? or preintervention? or "pre intervention?" or post-intervention? or postintervention? or "post intervention?").ti,ab. (11719)
- 3 (hospital\$ or patient?).hw. and (study or studies or care or health\$ or practitioner? or provider? or physician? or nurse? or nursing or doctor?).ti,hw. (747131)
- 4 demonstration project?.ti,ab. (2027)
- 5 (pre-post or "pre test\$" or pretest\$ or posttest\$ or "post test\$" or (pre adj5 post)).ti,ab. (72037)
- 6 (pre-workshop or post-workshop or (before adj3 workshop) or (after adj3 workshop)).ti,ab. (653)
- 7 trial.ti. or ((study adj3 aim?) or "our study").ab. (697929)
- 8 (before adj10 (after or during)).ti,ab. (375455)
- 9 ("quasi-experiment\$" or quasiexperiment\$ or "quasi random\$" or quasirandom\$ or "quasi control\$" or quasicontrol\$ or ((quasi\$ or experimental) adj3 (method\$ or study or trial or design\$))).ti,ab,hw. (107858)
- 10 ("time series" adj2 interrupt\$).ti,ab,hw. (1212)
- 11 (time points adj3 (over or multiple or three or four or five or six or seven or eight or nine or ten or eleven or twelve or month\$ or hour? or day? or "more than")).ab. (10245)
- 12 pilot.ti. (43282)
- 13 Pilot projects/ (86631)
- 14 (clinical trial or controlled clinical trial or multicenter study).pt. (644558)
- 15 (multicentre or multicenter or multi-centre or multi-center).ti. (31588)

- 1  
2  
3 16 random\$.ti,ab. or controlled.ti. (809402)  
4 17 (control adj3 (area or cohort? or compare? or condition or design or group? or  
5 intervention? or participant? or study)).ab. not (controlled clinical trial or  
6 randomized controlled trial).pt. (440969)  
7  
8  
9 18 Aged/ (2394306)  
10 19 "Aged, 80 and over"/ (647729)  
11  
12 20 older adults.mp. (38411)  
13 21 elderly adults.mp. (2417)  
14 22 over 65 years.mp. (3421)  
15 23 virtual ward.mp. (12)  
16 24 intermediate care.mp. (1478)  
17 25 Crisis response.mp. (103)  
18 26 Crisis resolution.mp. (99)  
19 27 reablement.mp. (12)  
20 28 re-ablement.mp. (11)  
21 29 hospital care at home.mp. (14)  
22 30 hospital-at-home.mp. (289)  
23 31 home hospital.mp. (150)  
24 32 medical day hospital care.mp. (2)  
25 33 day hospital.mp. (2435)  
26 34 out-patient facility.mp. (13)  
27 35 Domiciliary care.mp. (247)  
28 36 intermediate services.mp. (7)  
29 37 Intermediate Care Facilities/ (639)  
30 38 Home Care Services, Hospital-Based/ (1662)  
31 39 Home Health Nursing/ (58)  
32 40 Home Nursing/ (8049)  
33 41 admission avoidance.mp. (56)  
34 42 outreach program.mp. (677)  
35 43 hospital outreach.mp. (27)  
36 44 nursing-led units.mp. (3)  
37 45 hospital in home.mp. (8)  
38 46 hospital in the home.mp. (123)  
39 47 medical home care.mp. (39)  
40  
41  
42  
43  
44  
45  
46  
47  
48  
49  
50  
51  
52  
53  
54  
55  
56  
57  
58  
59  
60

- 1  
2  
3 48 Crisis intervention service.mp. (31)  
4 49 Geriatric emergency management practice model.mp. (1)  
5 50 day unit.mp. (169)  
6 51 Day Care/ (4670)  
7 52 day centre.mp. (170)  
8 53 comprehensive elderly care.mp. (2)  
9 54 Substitutive care.mp. (1)  
10 55 shared care.mp. (916)  
11 56 guided care.mp. (69)  
12 57 home-based versus hospital-based.mp. (11)  
13 58 home hospitalisation.mp. (28)  
14 59 rapid response team.mp. (515)  
15 60 rapid response nurse.mp. (2)  
16 61 Hospitals, Community/ (10479)  
17 62 \*Ambulatory Care/ (15963)  
18 63 \*Health Services for the Aged/ (12112)  
19 64 or/1-17 (3278427)  
20 65 or/23-63 (57831)  
21 66 or/18-22 (2428347)  
22 67 64 and 65 and 66 (11288)  
23 68 67 not (child/ or infant/ or adolescent/ or maternal health services/) (9807)  
24 69 68 not (case report/ or case study/ or letter/ or editorial/ or expert opinion.mp.)  
25 [mp=title, abstract, original title, name of substance word, subject heading  
26 word, keyword heading word, protocol supplementary concept word, rare  
27 disease supplementary concept word, unique identifier] (9192)  
28 70 69 not (Algeria\$ or Egypt\$ or Liby\$ or Morocc\$ or Tunisia\$ or Western  
29 Sahara\$ or Angola\$ or Benin or Botswana\$ or Burkina Faso or Burundi or  
30 Cameroon or Cape Verde or Central African Republic or Chad or Comoros or  
31 Congo or Djibouti or Eritrea or Ethiopia\$ or Gabon or Gambia\$ or Ghana or  
32 Guinea or Keny\$ or Lesotho or Liberia or Madagasca\$ or Malawi or Mali or  
33 Mauritania or Mauritius or Mayotte or Mozambiq\$ or Namibia\$ or Niger or  
34 Nigeria\$ or Reunion or Rwand\$ or Saint Helena or Senegal or Seychelles or  
35 Sierra Leone or Somalia or South Africa\$ or Sudan or Swaziland or Tanzania  
36 or Togo or Ugand\$ or Zambia\$ or Zimbabw\$ or China or Chinese or Hong  
37 Kong or Macao or Mongolia\$ or Taiwan\$ or Belarus or Moldov\$ or Russia\$ or  
38 Ukraine or Afghanistan or Armenia\$ or Azerbaijan or Bahrain or Cyprus or  
39 Cypriot or Georgia\$ or Iran\$ or Iraq\$ or Israel\$ or Jordan\$ or Kazakhstan or  
40 Kuwait or Kyrgyzstan or Leban\$ or Oman or Pakistan\$ or Palestin\$ or Qatar or  
41 Saudi Arabia or Syria\$ or Tajikistan or Turkmenistan or United Arab Emirates  
42  
43  
44  
45  
46  
47  
48  
49  
50  
51  
52  
53  
54  
55  
56  
57  
58  
59  
60



1  
2  
3 or Uzbekistan or Yemen or Bangladesh\$ or Bhutan or British Indian Ocean  
4 Territory or Brunei Darussalam or Cambodia\$ or India\$ or Indonesia\$ or Lao or  
5 People's Democratic Republic or Malaysia\$ or Maldives or Myanmar or Nepal  
6 or Philippin\$ or Singapore or Sri Lanka or Thai\$ or Timor Leste or Vietnam or  
7 Albania\$ or Andorra or Bosnia\$ or Herzegovina\$ or Bulgaria\$ or Croatia\$ or  
8 Estonia or Faroe Islands or Greenland or Liechtenstein or Lithuanian\$ or  
9 Macedonia or Malta or Maltese or Romania or Serbia\$ or Montenegro or  
10 Slovenia or Svalbard or Argentina\$ or Belize or Bolivia\$ or Brazil\$ or Chile or  
11 Chilean or Colombia\$ or Costa Rica\$ or Cuba or Ecuador or El Salvador or  
12 French Guiana or Guatemala\$ or Guyana or Haiti or Honduras or Jamaica\$ or  
13 Nicaragua\$ or Panama or Paraguay or Peru or Puerto Rico or Suriname or  
14 Uruguay or Venezuela or developing countries\$ or South America\$).ti,sh. (8719)  
15  
16

- 17 71 admission\*.ab. (140603)  
18 72 hospital\*.ab. (747796)  
19 73 71 or 72 (804011)  
20 74 70 and 73 (3851)  
21 75 limit 74 to yr="2005 -Current" (1880)  
22 76 remove duplicates from 75 (1829)  
23  
24  
25  
26  
27  
28  
29  
30  
31  
32  
33  
34  
35  
36  
37  
38  
39  
40  
41  
42  
43  
44  
45  
46  
47  
48  
49  
50  
51  
52  
53  
54  
55  
56  
57  
58  
59  
60



## Appendix 2: EPOC Risk of bias

### Paramedic (PP) / emergency care practitioner (ECP) interventions

#### Study: Mason 2007 RCT - older population with mixed conditions

| Bias                                                                        | Authors' judgement | Support for judgement                                                                                                                                                                                                                                                                                                                                                                                                                                                                                                                  |
|-----------------------------------------------------------------------------|--------------------|----------------------------------------------------------------------------------------------------------------------------------------------------------------------------------------------------------------------------------------------------------------------------------------------------------------------------------------------------------------------------------------------------------------------------------------------------------------------------------------------------------------------------------------|
| Was allocation sequence adequately generated?                               | Low risk           | 'We used cluster randomisation to reduce the risk of contamination (practice in the control group being influenced by the presence of the paramedic practitioner in the community) and to allow service level, rather than individual patient level, evaluation of the intervention. Weeks were randomised before the start of the study (to allow for rostering of the paramedic practitioners) to the paramedic practitioner service being active (intervention) or inactive (control), when the standard 999 service was available' |
| Was allocation adequately concealed?                                        | Low risk           | 'Episode of care with some form of centralised randomisation scheme'                                                                                                                                                                                                                                                                                                                                                                                                                                                                   |
| Were baseline outcome measurements similar?                                 | Unclear risk       | No baseline measure of outcomes since they were related to receiving intervention e.g. ED attendance                                                                                                                                                                                                                                                                                                                                                                                                                                   |
| Were baseline characteristics similar?                                      | Low risk           | Baseline characteristics of intervention and control groups were reported and similar                                                                                                                                                                                                                                                                                                                                                                                                                                                  |
| Were incomplete outcome data adequately addressed?                          | Low risk           | Flow of patients through trial was presented and intention-to-treat analysis used                                                                                                                                                                                                                                                                                                                                                                                                                                                      |
| Was knowledge of allocated interventions adequately prevented during study? | Low risk           | Majority of outcomes were objective but there was one about satisfaction with service i.e. subjective                                                                                                                                                                                                                                                                                                                                                                                                                                  |
| Was study adequately protected against contamination?                       | Low risk           | 'We used cluster randomisation to reduce the risk of contamination (practice in the control group being influenced by the presence of the paramedic practitioner in the community) and to allow service level, rather than individual patient level, evaluation of the intervention.'                                                                                                                                                                                                                                                  |
| Was study free from selective outcome reporting?                            | Low risk           | All outcome measures described in methods section were reported in results section                                                                                                                                                                                                                                                                                                                                                                                                                                                     |
| Was study free from other risks of bias?                                    | Low risk           | Nothing obvious                                                                                                                                                                                                                                                                                                                                                                                                                                                                                                                        |

#### Study: Gray 2008 historical controls - older people with falls

| Bias                                                                        | Authors' judgement | Support for judgement                                                                                                                                                                                                                                                                                                                                                                                             |
|-----------------------------------------------------------------------------|--------------------|-------------------------------------------------------------------------------------------------------------------------------------------------------------------------------------------------------------------------------------------------------------------------------------------------------------------------------------------------------------------------------------------------------------------|
| Was allocation sequence adequately generated?                               | High risk          | 'From January to April 2006 inclusive, all the patients seen by the ECP service who had rung 999 with a diagnosis of either breathing difficulties or an elderly patient (.65 years of age) with a fall were reviewed.' 'Comparison data were taken from January to April 2005 inclusive for attendances to the same ED for patients with the same criteria as above seen by non-ECP ambulance service personnel' |
| Was allocation adequately concealed?                                        | High risk          | As above                                                                                                                                                                                                                                                                                                                                                                                                          |
| Were baseline outcome measurements similar?                                 | Unclear risk       | No baseline measure of outcomes since they were related to receiving intervention e.g. ED attendance                                                                                                                                                                                                                                                                                                              |
| Were baseline characteristics similar?                                      | Unclear risk       | No details given other than 'elderly patients >65yrs with a fall'                                                                                                                                                                                                                                                                                                                                                 |
| Were incomplete outcome data adequately addressed?                          | Unclear risk       | No reference to missing data or how it might be handled                                                                                                                                                                                                                                                                                                                                                           |
| Was knowledge of allocated interventions adequately prevented during study? | Low risk           | Outcome measures were all objective                                                                                                                                                                                                                                                                                                                                                                               |
| Was study adequately protected against contamination?                       | Low risk           | Different data collection time-periods were reported for each group                                                                                                                                                                                                                                                                                                                                               |
| Was study free from selective outcome reporting?                            | Low risk           | All outcome measures described in methods section were reported in results section                                                                                                                                                                                                                                                                                                                                |
| Was study free from other risks of bias?                                    | Low risk           | Only used half of the study population                                                                                                                                                                                                                                                                                                                                                                            |

#### Study: Mason 2012 'quasi experimental' - older population with mixed conditions

| Bias                                                                        | Authors' judgement | Support for judgement                                                                                                                                                                                                                                                                                                                                                  |
|-----------------------------------------------------------------------------|--------------------|------------------------------------------------------------------------------------------------------------------------------------------------------------------------------------------------------------------------------------------------------------------------------------------------------------------------------------------------------------------------|
| Was allocation sequence adequately generated?                               | High risk          | 'Potential 'intervention' trust sites were selected on the basis of their heterogeneity of service delivery of ECP care. 'Control' trust sites that did not employ ECPs, but were in close geographical proximity (i.e. within the same or in a neighbouring county) and which offered the same service configurations as the intervention trusts, were then selected' |
| Was allocation adequately concealed?                                        | High risk          | As above                                                                                                                                                                                                                                                                                                                                                               |
| Were baseline outcome measurements similar?                                 | Unclear risk       | No baseline measure of outcomes since they were related to receiving intervention e.g. ED attendance                                                                                                                                                                                                                                                                   |
| Were baseline characteristics similar?                                      | High risk          | For the care home subgroup, figures were given on selected baseline characteristics but no formal comparison appeared to be made. On face value, clinical characteristics were not balanced e.g. adult medical 30 vs.41%, adult trauma 46 vs.13%                                                                                                                       |
| Were incomplete outcome data adequately addressed?                          | Unclear risk       | No reference to missing data or how it might be handled                                                                                                                                                                                                                                                                                                                |
| Was knowledge of allocated interventions adequately prevented during study? | Low risk           | Outcome measures were all objective                                                                                                                                                                                                                                                                                                                                    |
| Was study adequately protected against contamination?                       | Low risk           | Intervention and control were delivered in different locations                                                                                                                                                                                                                                                                                                         |
| Was study free from selective outcome reporting?                            | Low risk           | All outcome measures described in methods section were reported in results section                                                                                                                                                                                                                                                                                     |
| Was study free from other risks of bias?                                    | Low risk           | Nothing obvious                                                                                                                                                                                                                                                                                                                                                        |

**Emergency Department (ED) interventions****Study: Sun 2014 RCT - syncope**

| Bias                                                                        | Authors' judgement | Support for judgement                                                                                                                                                                                                                         |
|-----------------------------------------------------------------------------|--------------------|-----------------------------------------------------------------------------------------------------------------------------------------------------------------------------------------------------------------------------------------------|
| Was allocation sequence adequately generated?                               | Low risk           | 'Patients were block randomized (n=4) by site in a 1:1 ratio to either the observation protocol or routine inpatient admission'                                                                                                               |
| Was allocation adequately concealed?                                        | Low risk           | 'A computer generated the study arm assignment at randomization, and no research personnel had advance knowledge of study arm assignment. We could not blind this health service intervention to patients, providers, or research personnel.' |
| Were baseline outcome measurements similar?                                 | Unclear risk       | No baseline measure of outcomes since they were related to receiving intervention e.g. inpatient admission rates                                                                                                                              |
| Were baseline characteristics similar?                                      | Low risk           | Baseline characteristics of intervention and control groups were reported and similar                                                                                                                                                         |
| Were incomplete outcome data adequately addressed?                          | Low risk           | Flow chart of participants provided and intention-to-treat analysis performed                                                                                                                                                                 |
| Was knowledge of allocated interventions adequately prevented during study? | Low risk           | Outcome measures were objective but one secondary outcome - participant satisfaction - was subjective                                                                                                                                         |
| Was study adequately protected against contamination?                       | Unclear risk       | Treatment and control were allocated and delivered in same location so possible for participants to swap allocation                                                                                                                           |
| Was study free from selective outcome reporting?                            | Low risk           | All outcome measures described in methods section were reported in results section                                                                                                                                                            |
| Was study free from other risks of bias?                                    | Low risk           | Nothing obvious                                                                                                                                                                                                                               |

**Study: Salvi 2008 CT - older population with mixed conditions**

| Bias                                                                        | Authors' judgement | Support for judgement                                                                                                                                                                                            |
|-----------------------------------------------------------------------------|--------------------|------------------------------------------------------------------------------------------------------------------------------------------------------------------------------------------------------------------|
| Was allocation sequence adequately generated?                               | High risk          | 'Trained research assistant (VM) screened patients presenting to the ED for Monday to Friday from 9:00 a.m to 6:00 p.m using a standard information sheet explaining the study protocol to patients and proxies' |
| Was allocation adequately concealed?                                        | High risk          | As above                                                                                                                                                                                                         |
| Were baseline outcome measurements similar?                                 | Unclear risk       | No baseline measure of outcomes since they were related to receiving intervention e.g. number of initial admissions                                                                                              |
| Were baseline characteristics similar?                                      | High risk          | Intervention and control groups were unbalanced - age, 78.1(7) vs.82.5(7.2) p<0.001, female 47 vs. 68% p=0.004, married 70 vs. 40% p<0.001, SPMSQ 2.5(3.3) vs. 5.2(4.2) p<0.001, ADL4.3(2) vs. 3.2(2.5) p=0.001  |
| Were incomplete outcome data adequately addressed?                          | Unclear risk       | No reference to missing data or how it might be handled                                                                                                                                                          |
| Was knowledge of allocated interventions adequately prevented during study? | Low risk           | All outcome measures were objective                                                                                                                                                                              |
| Was study adequately protected against contamination?                       | Unclear risk       | Treatment and control were delivered in different locations                                                                                                                                                      |
| Was study free from selective outcome reporting?                            | Low risk           | All outcome measures described in methods section were reported in results section                                                                                                                               |
| Was study free from other risks of bias?                                    | Low risk           | Nothing obvious                                                                                                                                                                                                  |

**Study: Benaiges 2014 CT - hyperglycaemia**

| Bias                                                                        | Authors' judgement | Support for judgement                                                                                                                                                                                                          |
|-----------------------------------------------------------------------------|--------------------|--------------------------------------------------------------------------------------------------------------------------------------------------------------------------------------------------------------------------------|
| Was allocation sequence adequately generated?                               | High risk          | 'Patients were assigned to the DH group if they were admitted to hospital within DH opening hours (weekdays from 8:00 a.m to 4:00 p.m); otherwise they were treated in the emergency department and subsequently hospitalized' |
| Was allocation adequately concealed?                                        | High risk          | As above                                                                                                                                                                                                                       |
| Were baseline outcome measurements similar?                                 | Unclear risk       | No baseline measure of outcomes since they were related to receiving intervention e.g. number of ER visits                                                                                                                     |
| Were baseline characteristics similar?                                      | Low risk           | Baseline characteristics of treatment and control groups were reported and similar                                                                                                                                             |
| Were incomplete outcome data adequately addressed?                          | Unclear risk       | No reference to missing data or how it might be handled                                                                                                                                                                        |
| Was knowledge of allocated interventions adequately prevented during study? | Low risk           | All outcome measures were objective                                                                                                                                                                                            |
| Was study adequately protected against contamination?                       | Low risk           | 'Patients were treated with same protocol for both DH and CH' so contamination was possible                                                                                                                                    |
| Was study free from selective outcome reporting?                            | Low risk           | All outcome measures described in methods section were reported in results section                                                                                                                                             |
| Was study free from other risks of bias?                                    | Low risk           | Nothing obvious                                                                                                                                                                                                                |

## Community hospital interventions

### Study: Vicente 2014 RCT

| Bias                                                                        | Authors' judgement | Support for judgement                                                                                                                                                                                                                                                                                                                                                               |
|-----------------------------------------------------------------------------|--------------------|-------------------------------------------------------------------------------------------------------------------------------------------------------------------------------------------------------------------------------------------------------------------------------------------------------------------------------------------------------------------------------------|
| Was allocation sequence adequately generated?                               | Low risk           | 'The dispatchers at the EMCC randomized older adults into the study. A sealed envelope randomization procedure was initiated when the dispatcher received the incoming call and identified the participant as an individual aged 65 who resided in the specified geographical area and was assigned a priority level 2 or 3, and the call occurred between 8:00 a.m. and 10:00 p.m' |
| Was allocation adequately concealed?                                        | Low risk           | 'The envelope contained the name of the EMS Company 1 or the name of the EMS Company 2. There was an equal chance (1:1) of being assigned to either of the ambulance companies'                                                                                                                                                                                                     |
| Were baseline outcome measurements similar?                                 | Unclear risk       | No baseline measure of outcomes since they were related to receiving intervention e.g. number of individuals sent direct to community hospital                                                                                                                                                                                                                                      |
| Were baseline characteristics similar?                                      | High risk          | There was a difference in the priority level when ambulance sent out (% individuals) – Level 1) 1.6 vs. 0%, Level 2) 59 vs. 47%, Level 3) 39 vs. 53%, p=0.001                                                                                                                                                                                                                       |
| Were incomplete outcome data adequately addressed?                          | Unclear risk       | No reference to missing data or how it might be handled                                                                                                                                                                                                                                                                                                                             |
| Was knowledge of allocated interventions adequately prevented during study? | Low risk           | All outcome measures were objective                                                                                                                                                                                                                                                                                                                                                 |
| Was study adequately protected against contamination?                       | Low risk           | Separate sealed envelope opened for each individual case                                                                                                                                                                                                                                                                                                                            |
| Was study free from selective outcome reporting?                            | Low risk           | All outcome measures described in methods section were reported in results section                                                                                                                                                                                                                                                                                                  |
| Was study free from other risks of bias?                                    | Low risk           | Nothing obvious                                                                                                                                                                                                                                                                                                                                                                     |

### Study: Garasen 2007/8 ab RCT - older population with mixed conditions

| Bias                                                                        | Authors' judgement | Support for judgement                                                                                                                                                                                          |
|-----------------------------------------------------------------------------|--------------------|----------------------------------------------------------------------------------------------------------------------------------------------------------------------------------------------------------------|
| Was allocation sequence adequately generated?                               | Low risk           | 'When an eligible patient was identified and accepted for inclusion, a blinded randomisation was performed by the Clinical Research Department using random number tables in blocks to ensure balanced groups' |
| Was allocation adequately concealed?                                        | Low risk           | As above                                                                                                                                                                                                       |
| Were baseline outcome measurements similar?                                 | Unclear risk       | No baseline measure of outcomes since they were related to receiving intervention e.g. number of readmissions for index disease                                                                                |
| Were baseline characteristics similar?                                      | Unclear risk       | Baseline characteristics of intervention and control groups were described but no formal comparison reported                                                                                                   |
| Were incomplete outcome data adequately addressed?                          | Unclear            | No reference to missing data or how it might be handled                                                                                                                                                        |
| Was knowledge of allocated interventions adequately prevented during study? | Low risk           | All outcome measures were objective                                                                                                                                                                            |
| Was study adequately protected against contamination?                       | Low risk           | Participants were allocated using a clear process but 8 individuals originally assigned to CH were later assigned to GH                                                                                        |
| Was study free from selective outcome reporting?                            | Low risk           | All outcomes described in methods section were reported in results section plus 12-month data was used in Garasen 2008                                                                                         |
| Was study free from other risks of bias?                                    | Low risk           | Nothing obvious                                                                                                                                                                                                |

## Hospital-at-Home (HAH) interventions: heart failure

### Study: Patel 2008 pilot RCT - heart failure

| Bias                                                                        | Authors' judgement | Support for judgement                                                                                                                                       |
|-----------------------------------------------------------------------------|--------------------|-------------------------------------------------------------------------------------------------------------------------------------------------------------|
| Was allocation sequence adequately generated?                               | Low risk           | Open pilot RCT                                                                                                                                              |
| Was allocation adequately concealed?                                        | Unclear risk       | Used 'random number generator under direction of specialist nurse or hospital admission staff' but no further detail provided                               |
| Were baseline outcome measurements similar?                                 | Low risk           | Mostly not relevant since majority of outcomes were related to process                                                                                      |
| Were baseline characteristics similar?                                      | Low risk           | Baseline characteristics of intervention and control groups were reported and small differences seen in gender, education and two particular co-morbidities |
| Were incomplete outcome data adequately addressed?                          | High risk          | Flow of patients was described although description of analysis was lacking                                                                                 |
| Was knowledge of allocated interventions adequately prevented during study? | Unclear risk       | No detail provided                                                                                                                                          |
| Was study adequately protected against contamination?                       | Low risk           | Treatment and control were delivered in different locations                                                                                                 |
| Was study free from selective outcome reporting?                            | Unclear risk       | Difficult to understand the description of outcomes in methods section but all were reported in results section                                             |
| Was study free from other risks of bias?                                    | Unclear risk       | Description of analysis and results was possibly too assertive for a feasibility study                                                                      |

**Study: Mendoza 2009/Garcia-Soletto 2013 RCT - heart failure**

| Bias                                                                        | Authors' judgement | Support for judgement                                                                                                                                                                              |
|-----------------------------------------------------------------------------|--------------------|----------------------------------------------------------------------------------------------------------------------------------------------------------------------------------------------------|
| Was allocation sequence adequately generated?                               | Low risk           | 'Randomly assigned (1:1) to one of the intervention groups according to an externally generated sequence, which was hidden from the clinicians until the patient had given consent to participate' |
| Was allocation adequately concealed?                                        | Low risk           | As above                                                                                                                                                                                           |
| Were baseline outcome measurements similar?                                 | Low risk           | Mostly not relevant since outcomes were related to process but functional status and health-related QoL were similar                                                                               |
| Were baseline characteristics similar?                                      | Low risk           | Baseline characteristics of intervention and control groups were reported and similar                                                                                                              |
| Were incomplete outcome data adequately addressed?                          | Low risk           | Patient flow through trial was described and 'per protocol' analysis performed                                                                                                                     |
| Was knowledge of allocated interventions adequately prevented during study? | Unclear risk       | No detail provided                                                                                                                                                                                 |
| Was study adequately protected against contamination?                       | Low risk           | Treatment and control were delivered in different locations                                                                                                                                        |
| Was study free from selective outcome reporting?                            | Low risk           | All outcome measures described in methods section were reported in results section                                                                                                                 |
| Was study free from other risks of bias?                                    | Low risk           | Nothing obvious                                                                                                                                                                                    |

**Study: Tibaldi 2009 RCT - heart failure**

| Bias                                                                        | Authors' judgement | Support for judgement                                                                                                                                                                                                                                                                                                   |
|-----------------------------------------------------------------------------|--------------------|-------------------------------------------------------------------------------------------------------------------------------------------------------------------------------------------------------------------------------------------------------------------------------------------------------------------------|
| Was allocation sequence adequately generated?                               | Low risk           | 'By the use of a set of computer-generated random numbers in a 1:1 ratio. The allocation sequence was unknown to any of the investigators and was contained in a set of sealed envelopes, each bearing on the outside only the name of the hospital and a number, which was opened after the acceptance of the patient' |
| Was allocation adequately concealed?                                        | Low risk           | Participants were enrolled within 12-24 hours of ED admission by research assistants, masked to both allocation and hypotheses being tested                                                                                                                                                                             |
| Were baseline outcome measurements similar?                                 | Low risk           | Mostly not relevant since outcomes were related to process but depression, function and nutrition measures were similar                                                                                                                                                                                                 |
| Were baseline characteristics similar?                                      | Unclear risk       | Baseline characteristics of intervention and control groups were reported and heart rate was significantly different p=0.006                                                                                                                                                                                            |
| Were incomplete outcome data adequately addressed?                          | Low risk           | Patient flow through trial described and intention-to-treat analysis performed                                                                                                                                                                                                                                          |
| Was knowledge of allocated interventions adequately prevented during study? | Unclear risk       | No detail available                                                                                                                                                                                                                                                                                                     |
| Was study adequately protected against contamination?                       | Low risk           | Treatment and control were delivered in different locations                                                                                                                                                                                                                                                             |
| Was study free from selective outcome reporting?                            | Low risk           | All outcome measures described in methods section were reported in results section                                                                                                                                                                                                                                      |
| Was study free from other risks of bias?                                    | Low risk           | Nothing obvious                                                                                                                                                                                                                                                                                                         |

**Hospital-at-Home (HAH): COPD****Study: Ricauda 2008 RCT - COPD**

| Bias                                                                        | Authors' judgement | Support for judgement                                                                                                                                                                                                                                                                                             |
|-----------------------------------------------------------------------------|--------------------|-------------------------------------------------------------------------------------------------------------------------------------------------------------------------------------------------------------------------------------------------------------------------------------------------------------------|
| Was allocation sequence adequately generated?                               | Low risk           | Patients were randomised using a set of computer-generated random numbers in a 1:1 ratio.                                                                                                                                                                                                                         |
| Was allocation adequately concealed?                                        | Low risk           | Allocation sequence was unknown to any of the investigators and kept in a set of sealed envelopes, each bearing on the outside only the name of the hospital and a number. After acceptance of a patient, the ED nurse coordinator, who was not involved in the study, opened the appropriately numbered envelope |
| Were baseline outcome measurements similar?                                 | Low risk           | Mostly not relevant since outcomes were related to process but clinical outcomes e.g. depression were similar                                                                                                                                                                                                     |
| Were baseline characteristics similar?                                      | Low risk           | Recorded in DE table                                                                                                                                                                                                                                                                                              |
| Were incomplete outcome data adequately addressed?                          | Low risk           | Drop outs/loss-to-follow-up were recorded and intention-to-treat analysis performed                                                                                                                                                                                                                               |
| Was knowledge of allocated interventions adequately prevented during study? | Unclear risk       | Single-blind study since patients were aware of the treatment assignment although physicians and nurses evaluating patients were blinded to the patient's allocation                                                                                                                                              |
| Was study adequately protected against contamination?                       | Low risk           | Treatment and control were delivered in different locations                                                                                                                                                                                                                                                       |
| Was study free from selective outcome reporting?                            | Low risk           | All outcome measures described in methods section were reported in results section                                                                                                                                                                                                                                |
| Was study free from other risks of bias?                                    | Low risk           | Nothing obvious                                                                                                                                                                                                                                                                                                   |

## Hospital-at-Home (HAH): Pulmonary embolism

### Study: Rodriguez-Cerillo 2009 nRCT - non-massive pulmonary embolism

| Bias                                                                        | Authors' judgement | Support for judgement                                                                                                                                                         |
|-----------------------------------------------------------------------------|--------------------|-------------------------------------------------------------------------------------------------------------------------------------------------------------------------------|
| Was allocation sequence adequately generated?                               | High risk          | nRCT                                                                                                                                                                          |
| Was allocation adequately concealed?                                        | High risk          | nRCT                                                                                                                                                                          |
| Were baseline outcome measurements similar?                                 | Low risk           | Mostly not relevant since outcomes were related to process                                                                                                                    |
| Were baseline characteristics similar?                                      | Low risk           | Baseline characteristics of treatment and control groups were reported and only difference was prior thromboembolic disease, with these cases all being allocated to hospital |
| Were incomplete outcome data adequately addressed?                          | High risk          | No patient flow or analysis was described                                                                                                                                     |
| Was knowledge of allocated interventions adequately prevented during study? | High risk          | nRCT                                                                                                                                                                          |
| Was study adequately protected against contamination?                       | Low risk           | Clinical decision-making at study entry and any subsequent changes were recorded – although none made in practice                                                             |
| Was study free from selective outcome reporting?                            | Low risk           | All outcome measures described in methods section were reported in results section                                                                                            |
| Was study free from other risks of bias?                                    | High risk          | Reported some 'external' decision-making                                                                                                                                      |

## Hospital-at-Home (HAH): Pneumonia

### Study: Carratala 2005 open RCT - pneumonia

| Bias                                                                        | Authors' judgement | Support for judgement                                                                                                                                                                                                                                                                                                                                                                                       |
|-----------------------------------------------------------------------------|--------------------|-------------------------------------------------------------------------------------------------------------------------------------------------------------------------------------------------------------------------------------------------------------------------------------------------------------------------------------------------------------------------------------------------------------|
| Was allocation sequence adequately generated?                               | Low risk           | Randomisation was performed by using a computer-generated random code with a block size of 10                                                                                                                                                                                                                                                                                                               |
| Was allocation adequately concealed?                                        | Low risk           | Randomisation was stratified by hospital site, and the random code was held centrally, in a sealed envelope, by the clinical epidemiologist. In the emergency department, the infectious disease consultant (in most cases not a study investigator) opened sealed, sequentially numbered opaque envelopes to randomly assign patients who had provided written informed consent and met the study criteria |
| Were baseline outcome measurements similar?                                 | Low risk           | Mostly not relevant since outcomes were related to process                                                                                                                                                                                                                                                                                                                                                  |
| Were baseline characteristics similar?                                      | Low risk           | Detailed in DE table                                                                                                                                                                                                                                                                                                                                                                                        |
| Were incomplete outcome data adequately addressed?                          | Low risk           | Patient flow through trial was reported and intention-to-treat analysis performed                                                                                                                                                                                                                                                                                                                           |
| Was knowledge of allocated interventions adequately prevented during study? | Unclear risk       | Trial was described as 'unblinded'                                                                                                                                                                                                                                                                                                                                                                          |
| Was study adequately protected against contamination?                       | Low risk           | Treatment and control were delivered in different locations                                                                                                                                                                                                                                                                                                                                                 |
| Was study free from selective outcome reporting?                            | Low risk           | All outcome measures described in methods section were reported in results section                                                                                                                                                                                                                                                                                                                          |
| Was study free from other risks of bias?                                    | Unclear risk       | Lack of blinding in terms of assessment could be problematic                                                                                                                                                                                                                                                                                                                                                |

## Hospital-at-Home (HAH): Stroke

### Study: Kalra 2005 RCT - stroke

| Bias                                                                        | Authors' judgement | Support for judgement                                                                                                                                                                                                                       |
|-----------------------------------------------------------------------------|--------------------|---------------------------------------------------------------------------------------------------------------------------------------------------------------------------------------------------------------------------------------------|
| Was allocation sequence adequately generated?                               | Low risk           | Randomisation was not stratified and was undertaken using the block randomisation technique. This ensured that the number of patients allocated to the stroke unit or to domiciliary services at any one time did not exceed their capacity |
| Was allocation adequately concealed?                                        | Unclear risk       | Randomisation was conducted in blocks of 30 in an office remote from patient treatment areas, so that it would not be possible for those enrolling patients to guess allocation for the vast majority of subjects                           |
| Were baseline outcome measurements similar?                                 | Low risk           | Mostly not relevant since outcomes were related to process                                                                                                                                                                                  |
| Were baseline characteristics similar?                                      | Low risk           | Baseline characteristics with regard to stroke type, severity, level of impairment and initial disability were well-matched across the three groups                                                                                         |
| Were incomplete outcome data adequately addressed?                          | Low risk           | Patient flow through trial was reported and intention-to-treat analysis performed                                                                                                                                                           |
| Was knowledge of allocated interventions adequately prevented during study? | Unclear risk       | No detail provided                                                                                                                                                                                                                          |
| Was study adequately protected against contamination?                       | Unclear risk       | Patients were brought to hospital from domiciliary care if that was considered to be clinically appropriate                                                                                                                                 |
| Was study free from selective outcome reporting?                            | Low risk           | All outcome measures described in methods section were reported in results section                                                                                                                                                          |
| Was study free from other risks of bias?                                    | High risk          | In order to ensure that participants were treated in the most appropriate setting, swapping of groups was possible                                                                                                                          |

## Hospital-at-Home (HAH): Uncomplicated diverticulitis

### Study: Rodriguez-Cerrillo 2013 nRCT - uncomplicated diverticulitis

| Bias                                                                        | Authors' judgement | Support for judgement                                                              |
|-----------------------------------------------------------------------------|--------------------|------------------------------------------------------------------------------------|
| Was allocation sequence adequately generated?                               | High risk          | nRCT                                                                               |
| Was allocation adequately concealed?                                        | High risk          | As above                                                                           |
| Were baseline outcome measurements similar?                                 | Low risk           | Mostly not relevant since outcomes were related to process                         |
| Were baseline characteristics similar?                                      | Low risk           | Very limited details provided about age, gender and presenting complaint           |
| Were incomplete outcome data adequately addressed?                          | High risk          | No flow of patients was given and only basic analysis reported                     |
| Was knowledge of allocated interventions adequately prevented during study? | High risk          | No detail provided                                                                 |
| Was study adequately protected against contamination?                       | Low risk           | Treatment and control were delivered in different locations                        |
| Was study free from selective outcome reporting?                            | Low risk           | All outcome measures described in methods section were reported in results section |
| Was study free from other risks of bias?                                    | Unclear risk       | Both analysis and reporting of results were limited                                |

## Hospital-at-Home (HAH): Mixed population

### Study: Leff 2005/2009 'quasi experimental' - older population with mixed conditions

| Bias                                                                        | Authors' judgement | Support for judgement                                                                                                                                                                                                                                                                                                                                                                                                   |
|-----------------------------------------------------------------------------|--------------------|-------------------------------------------------------------------------------------------------------------------------------------------------------------------------------------------------------------------------------------------------------------------------------------------------------------------------------------------------------------------------------------------------------------------------|
| Was allocation sequence adequately generated?                               | High risk          | 'During the acute care hospital observation phase (1 November 1990 to 30 September 2001), eligible patients were identified and followed through usual hospital care.' During the intervention phase (1 November 2001 to 30 September 2002), eligible patients were identified at the time of admission and were offered the option of receiving their care in hospital-at-home rather than in the acute care hospital' |
| Was allocation adequately concealed?                                        | High risk          | As above                                                                                                                                                                                                                                                                                                                                                                                                                |
| Were baseline outcome measurements similar?                                 | Unclear risk       | No baseline measure of outcomes since they were related to receiving intervention e.g. time before evaluation                                                                                                                                                                                                                                                                                                           |
| Were baseline characteristics similar?                                      | High risk          | Populations differed in measures of poverty, living alone and medication. This was acknowledged but not adjusted for.                                                                                                                                                                                                                                                                                                   |
| Were incomplete outcome data adequately addressed?                          | Low risk           | Intention-to-treat analysis was conducted although there were substantial missing data e.g. in relation to functional status                                                                                                                                                                                                                                                                                            |
| Was knowledge of allocated interventions adequately prevented during study? | Low risk           | All outcomes were objective in Leff 2005 (main publication) but Leff 2009 used self-reported i.e. subjective daily activity of living as an outcome                                                                                                                                                                                                                                                                     |
| Was study adequately protected against contamination?                       | Low risk           | Unlikely that control group received intervention and vice versa. Rather, patients were allocated HaH or admitted and, if HaH was unacceptable they were admitted                                                                                                                                                                                                                                                       |
| Was study free from selective outcome reporting?                            | Low risk           | All outcomes described in methods section were reported in results section. Whilst there is no mention of activities of daily living in Leff 2005, this outcome was reported in Leff 2009                                                                                                                                                                                                                               |
| Was study free from other risks of bias?                                    | Unclear risk       | Possible selection bias related to differences in baseline characteristics e.g. functional status                                                                                                                                                                                                                                                                                                                       |

### Study: Lau 2003 historical controls

| Bias                                                                        | Authors' judgement | Support for judgement                                                                                                                                                                                                                                                                                                                                                  |
|-----------------------------------------------------------------------------|--------------------|------------------------------------------------------------------------------------------------------------------------------------------------------------------------------------------------------------------------------------------------------------------------------------------------------------------------------------------------------------------------|
| Was allocation sequence adequately generated?                               | High risk          | Control trial with historical control group                                                                                                                                                                                                                                                                                                                            |
| Was allocation adequately concealed?                                        | High risk          | As above                                                                                                                                                                                                                                                                                                                                                               |
| Were baseline outcome measurements similar?                                 | Unclear risk       | No baseline measure of outcomes since they were related to receiving intervention e.g. palliative care received                                                                                                                                                                                                                                                        |
| Were baseline characteristics similar?                                      | High risk?         | There was an imbalance in patient characteristics which may have been due to recruitment bias since the provider was responsible for recruiting patients into the trial. There were more dementia patients treated outside of hospital – although presumably their symptoms were 'fairly mild' since more pronounced behavioural problems were excluded from HaH group |
| Were incomplete outcome data adequately addressed?                          | Unclear risk       | No reference to missing data or how it might be handled                                                                                                                                                                                                                                                                                                                |
| Was knowledge of allocated interventions adequately prevented during study? | Low risk           | All outcomes were objective                                                                                                                                                                                                                                                                                                                                            |
| Was study adequately protected against contamination?                       | Low risk           | Unlikely that control group received intervention and vice versa. Rather, patients were allocated HaH or admitted and, if HaH was unacceptable they were admitted                                                                                                                                                                                                      |
| Was study free from selective outcome reporting?                            | Low risk           | All outcome measures described in methods section were reported in results section                                                                                                                                                                                                                                                                                     |
| Was study free from other risks of bias?                                    | Low risk           | Nothing obvious                                                                                                                                                                                                                                                                                                                                                        |

**Study name: Crilly 2010 'quasi experimental' - older population with mixed conditions**

| Bias                                                                        | Authors' judgement | Support for judgement                                                                                                                                                                                                                                                                                                                |
|-----------------------------------------------------------------------------|--------------------|--------------------------------------------------------------------------------------------------------------------------------------------------------------------------------------------------------------------------------------------------------------------------------------------------------------------------------------|
| Was allocation sequence adequately generated?                               | High risk          | Intervention group included 62 Aged Care Facility (ACF) residents who were enrolled in the Hospital in Nursing home programme during the first 12 months that the programme was operational, from 1 July 2003–30 June 2004. All sample members were ACF residents who presented to the ED and were subsequently admitted to hospital |
| Was allocation adequately concealed?                                        | High risk          | As above                                                                                                                                                                                                                                                                                                                             |
| Were baseline outcome measurements similar?                                 | Unclear risk       | No baseline measure of outcomes since they were related to receiving intervention e.g. palliative care received                                                                                                                                                                                                                      |
| Were baseline characteristics similar?                                      | Low risk           | Baseline characteristics of the study and control are reported and similar                                                                                                                                                                                                                                                           |
| Were incomplete outcome data adequately addressed?                          | Unclear            | No reference to missing data or how it might be handled                                                                                                                                                                                                                                                                              |
| Was knowledge of allocated interventions adequately prevented during study? | Low risk           | All outcomes were objective                                                                                                                                                                                                                                                                                                          |
| Was study adequately protected against contamination?                       | Low risk           | Unlikely that control group received intervention and vice versa. Rather, patients were allocated HaH or admitted and, if HaH was unacceptable they were admitted                                                                                                                                                                    |
| Was study free from selective outcome reporting?                            | Low risk           | All outcome measures described in methods section were reported in results section                                                                                                                                                                                                                                                   |
| Was study free from other risks of bias?                                    | Low risk           | Nothing obvious                                                                                                                                                                                                                                                                                                                      |



## Appendix 3: AMSTAR ratings of systematic reviews

| Study                     | Was an 'a priori' design provided? | Was there duplicate study selection and data extraction? | Was a comprehensive literature search performed? | Was the status of publication (i.e. grey literature) used as an inclusion criterion? | Was a list of studies (included and excluded) provided? | Were the characteristics of the included studies provided?                      | Was the scientific quality of the included studies assessed and documented? | Was the scientific quality of the included studies used appropriately in formulating conclusions? | Were the methods used to combine the findings of studies appropriate?                                       | Was the likelihood of publication bias assessed? | Was the conflict of interest included? |
|---------------------------|------------------------------------|----------------------------------------------------------|--------------------------------------------------|--------------------------------------------------------------------------------------|---------------------------------------------------------|---------------------------------------------------------------------------------|-----------------------------------------------------------------------------|---------------------------------------------------------------------------------------------------|-------------------------------------------------------------------------------------------------------------|--------------------------------------------------|----------------------------------------|
| Caplan 2012               | YES                                | YES                                                      | YES                                              | YES                                                                                  | NO<br>excluded studies not listed                       | NO<br>studies were grouped by medical, surgical, rehabilitation and psychiatric | YES                                                                         | YES                                                                                               | YES                                                                                                         | YES                                              | YES                                    |
| Chalmers 2011             | YES                                | YES                                                      | YES                                              | NO                                                                                   | NO<br>excluded studies not listed                       | YES<br>but no ages and no direct reporting of participants in either group      | YES<br>but not detailed and whilst Cochrane was cited only one RCT involved | YES                                                                                               | UNCLEAR<br>difficult to judge whether combination of study types is commonly accepted                       | No                                               | YES                                    |
| Jeppensen 2012 (Cochrane) | YES                                | YES                                                      | YES                                              | YES                                                                                  | YES                                                     | YES                                                                             | YES                                                                         | YES                                                                                               | YES                                                                                                         | YES                                              | YES                                    |
| Qaddoura 2015             | YES                                | YES                                                      | YES                                              | YES                                                                                  | NO<br>excluded studies not listed                       | YES                                                                             | YES                                                                         | NO<br>relatively high risk of bias but all available data used                                    | NO<br>meta-analysis of two RCTs plus combination of different QoL measures from same study in meta-analysis | NO                                               | YES                                    |
| Shepperd 2016 (Cochrane)  | YES                                | YES                                                      | YES                                              | YES                                                                                  | YES                                                     | YES                                                                             | YES                                                                         | YES                                                                                               | YES                                                                                                         | YES                                              | YES                                    |
| Varney 2014               | YES                                | NO<br>used single reviewer                               | YES                                              | YES                                                                                  | NO                                                      | YES                                                                             | YES                                                                         | NO                                                                                                | N/A<br>no data were combined                                                                                | NO                                               | YES                                    |
| Vinson 2012               | YES                                | YES                                                      | YES                                              | YES                                                                                  | YES                                                     | YES                                                                             | YES                                                                         | YES                                                                                               | YES                                                                                                         | NO                                               | NO                                     |



#### Appendix 4: description of interventions included in systematic review

| Intervention                                                                  | Description                                                                                                                                                                                                                                                                                                                                                                                                                                                                                                                                     |
|-------------------------------------------------------------------------------|-------------------------------------------------------------------------------------------------------------------------------------------------------------------------------------------------------------------------------------------------------------------------------------------------------------------------------------------------------------------------------------------------------------------------------------------------------------------------------------------------------------------------------------------------|
| Paramedic practitioner (PP) / emergency care practitioner (ECP) interventions | PPs/ECPs can be trained to 'assess and treat' or to refer patients with a range of conditions, as part of pre-hospital care. These roles were created in order to provide a more appropriate response to patients needs in emergency and urgent care settings. Their main purpose is to improve the pathway of care and patient experience, particularly by discharging patients at the scene or by referring on to the most appropriate care practitioner, reducing unnecessary emergency department (ED) attendance and avoidable admissions. |
| Community hospital (CH) interventions                                         | The role of CHs varies between country and health systems but, essentially, their main role is to provide non-urgent i.e. routine or rehabilitative care. However, their role can be extended to provide an alternative to acute hospital (AH) admission for appropriate cases.                                                                                                                                                                                                                                                                 |
| Emergency department (ED) interventions                                       | These involve initial assessment in the ED, followed by an extended stay for tests and observation. This extended stay is in a bed closely associated with the ED, if not part of it.                                                                                                                                                                                                                                                                                                                                                           |
| Hospital-at-home (HaH) interventions                                          | HaH services provide acute or sub-acute treatment in a patient's residence for a condition that would normally require admission to hospital. It is also known as 'hospital in the home' and 'home hospitalisation'.                                                                                                                                                                                                                                                                                                                            |
| Hospital in nursing/care home (HNCH) interventions                            | HNCH is as a model of admission avoidance to treat patients living in nursing and residential care homes, working on the same principles as HaH for community-dwelling residents.                                                                                                                                                                                                                                                                                                                                                               |

**Appendix 6: Characteristics of those older patients for whom the decision to admit to hospital may be unclear**

| <b>Patient characteristics</b>                                                                                                         | <b>Studies which include such populations</b>                                                                                                                                                                              |
|----------------------------------------------------------------------------------------------------------------------------------------|----------------------------------------------------------------------------------------------------------------------------------------------------------------------------------------------------------------------------|
| <b>Age ≥75 years</b><br>for included patients                                                                                          | 15/19 studies<br><br>Mason 2007 & 2012; Benaiges 2014; Salvi 2008; Garasen 2007; Vincente 2014; Patel 2008; Mendoza 2009; Tibaldi 2009; Ricauda 2008; Kalra 2005; Rodriguez-Cerillo 2013; Leff 2005; Crilly 2010; Lau 2013 |
| <b>Co/multi-morbidities</b><br>in included patients stated either by number of conditions or multi-morbidity score e.g. Charlson Score | 9/19 studies<br><br>Benaiges 2014; Salvi 2008; Patel 2008; Mendoza 2009; Tibaldi 2009; Ricauda 2008; Carratala 2005; Leff 2005; Lau 2013                                                                                   |
| <b>Dementia</b><br>either stated in a) patient demographics or b) used as an exclusion criterion based on severity                     | a) 2/19 studies<br><br>Rodriguez-Cerillo 2009; Lau 2013<br><br>b) 8/19 studies<br><br>Mason 2007; Sun 2014; Salvi 2008; Garasen 2007; Mendoza 2009; Tibaldi 2009; Ricauda 2008; Lau 2013                                   |
| <b>Social care support</b><br>stated in inclusion/exclusion criteria                                                                   | 3/19 studies<br><br>Tibaldi 2009; Ricauda 2008; Kalra 2005;                                                                                                                                                                |
| <b>Home situation</b><br>stated in inclusion/exclusion criteria                                                                        | 7/19 studies<br><br>Benaiges 2014; Garasen 2007; Mendoza 2009; Ricauda 2008; Rodriguez-Cerillo 2009, 2013; Lau 2013                                                                                                        |
| <b>Individual coping abilities</b><br>stated in inclusion/exclusion criteria                                                           | 2/19 studies<br><br>Patel 2008; Rodriguez-Cerillo 2013                                                                                                                                                                     |

## PROSPERO International prospective register of systematic reviews

### A systematic review to identify and assess the effectiveness of hospital alternatives for people over the age of 65 who are at risk of potentially avoidable hospital admission

Alyson Huntley, Melanie Chalder, Will Hollingworth, Chris Metcalfe, Ben Davies, Sarah Purdy

#### Citation

Alyson Huntley, Melanie Chalder, Will Hollingworth, Chris Metcalfe, Ben Davies, Sarah Purdy. A systematic review to identify and assess the effectiveness of hospital alternatives for people over the age of 65 who are at risk of potentially avoidable hospital admission. PROSPERO 2015:CRD42015020371 Available from [http://www.crd.york.ac.uk/PROSPERO\\_REBRANDING/display\\_record.asp?ID=CRD42015020371](http://www.crd.york.ac.uk/PROSPERO_REBRANDING/display_record.asp?ID=CRD42015020371)

#### Review question(s)

- 1) What admission alternatives are there for older patients and do they improve patient outcomes e.g. mortality, quality of life?
- 2) What are the defining characteristics of those older patients for whom the decision to admit to hospital may be unclear?

#### Searches

MEDLINE, MEDLINE in process, EMBASE, CINAHL and the Cochrane Central Register of Controlled Trials (CENTRAL) from 2005 to April 24th 2015. The Kings Fund and AHRQ websites were also searched

#### Types of study to be included

Any type of controlled study

#### Condition or domain being studied

Any condition that may result in an avoidable hospital admission in patients over the age of 65.

#### Participants/ population

People over 65 years of age of either sex living in OECD countries who are at risk of an unplanned admission (probably for an ambulatory sensitive condition) - they will therefore not be admitted to hospital at time of recruitment but could be in community or emergency department (being assessed).

#### Intervention(s), exposure(s)

The intervention of interest is admission to hospital, using definitions developed for previous studies (Huntley et al, Family Practice Fam Pract. 2013 Jun;30(3):266-75.). However it is important to point out that admission is likely to be the control group in many relevant studies.

#### Comparator(s)/ control

Alternatives to admission (likely to be described as the intervention) including but not limited to: hospital at home, virtual ward, rapid response nursing, care at home, admission to a care home, usual care.

#### Context

Reducing emergency bed days is one of the biggest challenges currently facing the National Health Service (NHS). There is considerable pressure to reduce hospital admissions amongst older people (D'Souza, BMJ 2013). There has been a 65% increase in hospital admissions for those over 75 years of age in the last decade, and the oldest old, those over 85 years, now account for 11% of emergency admissions and 25% of bed days (NHS England 2013). There are some older people for whom care in the community is safe, perhaps with the provision of additional services and some for whom admission is required in order to deliver diagnostic or treatment techniques that are only available as an in patient. This review seeks to identify interventions for those patients that do not fall neatly into one of these categories and in doing so will assess the efficacy of the interventions and provide more detail on this patient

1  
2  
3  
4 population.

5  
6 **Outcome(s)**

7 **Primary outcomes**

8 1) Patient outcomes (including mortality, quality of life, length of stay, readmission, adverse effects of intervention)  
9 plus costs if available.

10  
11 2) Patient characteristics for whom their pathway (admission or not) is unclear including risk factors e.g. co-  
12 morbidities (mental & physical), age, gender, social circumstances, disease severity, recent admission/discharge  
13 availability of other services

14  
15 **Secondary outcomes**

16 None

17  
18 **Data extraction, (selection and coding)**

19 Standardised data extraction forms will be developed using existing guidelines (Higgins 2008 Cochrane handbook  
20 chapter 7 section 7.5). Data will be abstracted by one reviewer. A second reviewer will check data abstraction against  
21 the original paper. Data items: details on participants, Interventions, comparisons, outcome measures

22  
23 **Risk of bias (quality) assessment**

24 Cochrane risk of bias tool will be used for randomised controlled trials. CASP criteria will be used for controlled  
25 trials

26  
27 **Strategy for data synthesis**

28 Meta-analysis of data will be performed using Review Manager Version 5.1 if there are at least three trials with  
29 combinable data with a fixed or random effects model depending on the level of between trial heterogeneity estimated  
30 using the I-squared statistic. Sensitivity analysis will be performed as the data dictates.

31  
32 **Analysis of subgroups or subsets**

33 Dependent on data found

34  
35 **Dissemination plans**

36 This review is part of programme development grant.

37  
38 **Contact details for further information**

39 Dr Huntley

40 Centre of Academic Primary Care,

41 School of Social & Community Medicine

42 University of Bristol

43 Canynge Hall

44 BS8 2PS

45 alyson.huntley@bristol.ac.uk

46  
47 **Organisational affiliation of the review**

48 University of Bristol

49 www.bristol.ac.uk/primaryhealthcare/

50  
51 **Review team**

52 Dr Alyson Huntley, University of Bristol

Dr Melanie Chalder, University of Bristol  
Professor Will Hollingworth, University of Bristol  
Dr Chris Metcalfe, University of Bristol  
Dr Ben Davies, University of Bristol  
Professor Sarah Purdy, University of Bristol

### Collaborators

Dr Ali Heawood, University of Bristol  
Mrs Helen England, BrisDoc  
Professor Jonathan Benger, University of the West of England

### Details of any existing review of the same topic by the same authors

None

### Anticipated or actual start date

02 February 2015

### Anticipated completion date

29 January 2016

### Funding sources/sponsors

NIHR Programme Development Grant RP-DG-1213-10004

### Conflicts of interest

None known

### Language

English

### Country

England

### Subject index terms status

Subject indexing assigned by CRD

### Subject index terms

Hospitalization; Hospitals; Humans

### Stage of review

Ongoing

### Date of registration in PROSPERO

14 May 2015

### Date of publication of this revision

14 May 2015

### DOI

10.15124/CRD42015020371

### Stage of review at time of this submission

Preliminary searches  
Piloting of the study selection process  
Formal screening of search results against eligibility criteria

### Started

No  
No  
Yes

### Completed

Yes  
Yes  
No

|                                   |    |    |
|-----------------------------------|----|----|
| Data extraction                   | No | No |
| Risk of bias (quality) assessment | No | No |
| Data analysis                     | No | No |

**PROSPERO**

**International prospective register of systematic reviews**

The information in this record has been provided by the named contact for this review. CRD has accepted this information in good faith and registered the review in PROSPERO. CRD bears no responsibility or liability for the content of this registration record, any associated files or external websites.

For peer review only

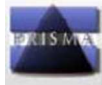

# PRISMA 2009 Checklist

1  
2  
3  
4  
5  
6  
7  
8  
9  
10  
11  
12  
13  
14  
15  
16  
17  
18  
19  
20  
21  
22  
23  
24  
25  
26  
27  
28  
29  
30  
31  
32  
33  
34  
35  
36  
37  
38  
39  
40  
41  
42  
43  
44  
45  
46  
47  
48  
49

| Section/topic                      | #  | Checklist item                                                                                                                                                                                                                                                                                              | Reported on page # |
|------------------------------------|----|-------------------------------------------------------------------------------------------------------------------------------------------------------------------------------------------------------------------------------------------------------------------------------------------------------------|--------------------|
| <b>TITLE</b>                       |    |                                                                                                                                                                                                                                                                                                             |                    |
| Title                              | 1  | Identify the report as a systematic review, meta-analysis, or both.                                                                                                                                                                                                                                         | Page 1             |
| <b>ABSTRACT</b>                    |    |                                                                                                                                                                                                                                                                                                             |                    |
| Structured summary                 | 2  | Provide a structured summary including, as applicable: background; objectives; data sources; study eligibility criteria, participants, and interventions; study appraisal and synthesis methods; results; limitations; conclusions and implications of key findings; systematic review registration number. | Pages 2-3          |
| <b>INTRODUCTION</b>                |    |                                                                                                                                                                                                                                                                                                             |                    |
| Rationale                          | 3  | Describe the rationale for the review in the context of what is already known.                                                                                                                                                                                                                              | Page 5             |
| Objectives                         | 4  | Provide an explicit statement of questions being addressed with reference to participants, interventions, comparisons, outcomes, and study design (PICOS).                                                                                                                                                  | Pages 5-6          |
| <b>METHODS</b>                     |    |                                                                                                                                                                                                                                                                                                             |                    |
| Protocol and registration          | 5  | Indicate if a review protocol exists, if and where it can be accessed (e.g., Web address), and, if available, provide registration information including registration number.                                                                                                                               | Page 6             |
| Eligibility criteria               | 6  | Specify study characteristics (e.g., PICOS, length of follow-up) and report characteristics (e.g., years considered, language, publication status) used as criteria for eligibility, giving rationale.                                                                                                      | Page 6             |
| Information sources                | 7  | Describe all information sources (e.g., databases with dates of coverage, contact with study authors to identify additional studies) in the search and date last searched.                                                                                                                                  | Page 6             |
| Search                             | 8  | Present full electronic search strategy for at least one database, including any limits used, such that it could be repeated.                                                                                                                                                                               | Appendix 1         |
| Study selection                    | 9  | State the process for selecting studies (i.e., screening, eligibility, included in systematic review, and, if applicable, included in the meta-analysis).                                                                                                                                                   | Pages 6-7          |
| Data collection process            | 10 | Describe method of data extraction from reports (e.g., piloted forms, independently, in duplicate) and any processes for obtaining and confirming data from investigators.                                                                                                                                  | Page 7             |
| Data items                         | 11 | List and define all variables for which data were sought (e.g., PICOS, funding sources) and any assumptions and simplifications made.                                                                                                                                                                       | Page 7             |
| Risk of bias in individual studies | 12 | Describe methods used for assessing risk of bias of individual studies (including specification of whether this was done at the study or outcome level), and how this information is to be used in any data synthesis.                                                                                      | Page 7             |
| Summary measures                   | 13 | State the principal summary measures (e.g., risk ratio, difference in means).                                                                                                                                                                                                                               | N/A                |
| Synthesis of results               | 14 | Describe the methods of handling data and combining results of studies, if done, including measures of consistency (e.g., $I^2$ ) for each meta-analysis.                                                                                                                                                   | Page 8             |



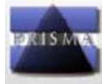

# PRISMA 2009 Checklist

| Section/topic                 | #  | Checklist item                                                                                                                                                                                           | Reported on page #                     |
|-------------------------------|----|----------------------------------------------------------------------------------------------------------------------------------------------------------------------------------------------------------|----------------------------------------|
| Risk of bias across studies   | 15 | Specify any assessment of risk of bias that may affect the cumulative evidence (e.g., publication bias, selective reporting within studies).                                                             | Page 7                                 |
| Additional analyses           | 16 | Describe methods of additional analyses (e.g., sensitivity or subgroup analyses, meta-regression), if done, indicating which were pre-specified.                                                         | n/a                                    |
| <b>RESULTS</b>                |    |                                                                                                                                                                                                          |                                        |
| Study selection               | 17 | Give numbers of studies screened, assessed for eligibility, and included in the review, with reasons for exclusions at each stage, ideally with a flow diagram.                                          | Page 8 and Figure 1                    |
| Study characteristics         | 18 | For each study, present characteristics for which data were extracted (e.g., study size, PICOS, follow-up period) and provide the citations.                                                             | Pages 8-17                             |
| Risk of bias within studies   | 19 | Present data on risk of bias of each study and, if available, any outcome level assessment (see item 12).                                                                                                | Pages 8-17 and Appendices 2 & 3        |
| Results of individual studies | 20 | For all outcomes considered (benefits or harms), present, for each study: (a) simple summary data for each intervention group (b) effect estimates and confidence intervals, ideally with a forest plot. | Pages 8-17 and Appendix 5              |
| Synthesis of results          | 21 | Present results of each meta-analysis done, including confidence intervals and measures of consistency.                                                                                                  | Pages 8-17 plus narrative presentation |
| Risk of bias across studies   | 22 | Present results of any assessment of risk of bias across studies (see Item 15).                                                                                                                          | Pages 8-17                             |
| Additional analysis           | 23 | Give results of additional analyses, if done (e.g., sensitivity or subgroup analyses, meta-regression [see Item 16]).                                                                                    | n/a                                    |
| <b>DISCUSSION</b>             |    |                                                                                                                                                                                                          |                                        |
| Summary of evidence           | 24 | Summarize the main findings including the strength of evidence for each main outcome; consider their relevance to key groups (e.g., healthcare providers, users, and policy makers).                     | Page 18                                |
| Limitations                   | 25 | Discuss limitations at study and outcome level (e.g., risk of bias), and at review-level (e.g., incomplete retrieval of identified research, reporting bias).                                            | Pages 18-19                            |
| Conclusions                   | 26 | Provide a general interpretation of the results in the context of other evidence, and implications for future research.                                                                                  | Page 19                                |
| <b>FUNDING</b>                |    |                                                                                                                                                                                                          |                                        |
| Funding                       | 27 | Describe sources of funding for the systematic review and other support (e.g., supply of data); role of funders for the systematic review.                                                               | Page 21                                |

From: Moher D, Liberati A, Tetzlaff J, Altman DG, The PRISMA Group (2009). Preferred Reporting Items for Systematic Reviews and Meta-Analyses: The PRISMA Statement. PLoS Med 6(7): e1000097. doi:10.1371/journal.pmed1000097

For peer review only: <https://bmjopen.bmj.com/site/about/guidelines.xhtml>



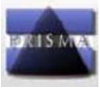

# PRISMA 2009 Checklist

Page 2 of 2

For peer review only

1  
2  
3  
4  
5  
6  
7  
8  
9  
10  
11  
12  
13  
14  
15  
16  
17  
18  
19  
20  
21  
22  
23  
24  
25  
26  
27  
28  
29  
30  
31  
32  
33  
34  
35  
36  
37  
38  
39  
40  
41  
42  
43  
44  
45  
46  
47  
48  
49

## Appendix 5 : Detail of included studies

## Paramedic/ECP interventions (n=3)

| Author<br>Year<br>Country | Study                                                                                                                                                                                 | Participants                                                                                                                                                                                                                                                                                                                                                                                                                                                                                                                                                                                                                                                                                                                                                                                                                                                 | Intervention                                                                                                                                                                                                                                                                                                                                                                                                                                                                                                                                                                                                                                                                                                                                                                                                                                                                                                                                                                                                                                                                                                                                                                                                                                                             | Control                                                                                                                                                                                                           | Outcomes assessed                                                                                                                                                                                                                                                                                                                                                                     | Results                                                                                                                                                                                                                                                                                                                                                                                                                                                                                                                                                                                                                                                          |
|---------------------------|---------------------------------------------------------------------------------------------------------------------------------------------------------------------------------------|--------------------------------------------------------------------------------------------------------------------------------------------------------------------------------------------------------------------------------------------------------------------------------------------------------------------------------------------------------------------------------------------------------------------------------------------------------------------------------------------------------------------------------------------------------------------------------------------------------------------------------------------------------------------------------------------------------------------------------------------------------------------------------------------------------------------------------------------------------------|--------------------------------------------------------------------------------------------------------------------------------------------------------------------------------------------------------------------------------------------------------------------------------------------------------------------------------------------------------------------------------------------------------------------------------------------------------------------------------------------------------------------------------------------------------------------------------------------------------------------------------------------------------------------------------------------------------------------------------------------------------------------------------------------------------------------------------------------------------------------------------------------------------------------------------------------------------------------------------------------------------------------------------------------------------------------------------------------------------------------------------------------------------------------------------------------------------------------------------------------------------------------------|-------------------------------------------------------------------------------------------------------------------------------------------------------------------------------------------------------------------|---------------------------------------------------------------------------------------------------------------------------------------------------------------------------------------------------------------------------------------------------------------------------------------------------------------------------------------------------------------------------------------|------------------------------------------------------------------------------------------------------------------------------------------------------------------------------------------------------------------------------------------------------------------------------------------------------------------------------------------------------------------------------------------------------------------------------------------------------------------------------------------------------------------------------------------------------------------------------------------------------------------------------------------------------------------|
| Mason<br>2007<br>UK       | Cluster RCT by service<br><br>56 clusters<br><br>Intervention:<br>paramedic practitioner<br>service<br>n=1469<br><br>Control:<br>Inactive paramedic<br>practitioner service<br>n=1549 | <b>Inclusion criteria:</b><br>Patients aged ≥60yrs recruited from 1 Sep 2003- 26 Sep 2004. Call originated from a Sheffield postcode between 8am-8pm, with a presenting complaint that fell within the scope of practice of the paramedic practitioners.<br><br><b>Exclusion criteria:</b><br><b>None given</b><br><br>‘If patients were unable to complete questionnaires e.g. because of cognitive impairment or who were unable to read English—we obtained consent for follow-up by review of clinical records only.<br><br><b>Baseline characteristics of participants</b><br>Intervention vs. control<br><b>Mean age (SD)</b><br>82.6(8.3) vs. 82.5(8.3) yrs<br><b>Women %</b><br>72 vs.73%<br><b>Living in on own home %</b><br>78vs.78 %<br><b>Presenting complaint %</b><br>Fall 88 vs.89%<br>Haemorrhage 6 vs.5%<br>Acute medical condition 6vs.5% | A paramedic practitioner based in the ambulance control room identified eligible calls by the presenting complaint and notified a paramedic practitioner. All identified patients were approached face to face either in the community or in ED for written consent to follow-up. Patients who had more than one eligible episode were recruited only once. The research team independently checked the ambulance service call database at the end of each month for any additional eligible calls not identified. These were checked for selection bias but not followed up. Scope of practice of paramedic practitioners: Falls, Lacerations, Epistaxis, Minor burns, Foreign body in ear, nose, or throat, Local anaesthetic techniques, Wound care and suturing techniques, Principles of dressings and splintage, Joint examination, Examination of neurological, cardiovascular, and respiratory system, Examination of ear, nose, and throat, Protocol led dispensing: simple analgesia, antibiotics, tetanus toxoid, Assessment of mobility and social needs, Additional options for referral and requesting investigations, Requests for radiography, Referral processes: emergency department, general practitioner, district nurse, community social services | A paramedic practitioner based in the ambulance control room identified eligible calls by the presenting complaint and notified a paramedic practitioner in the ED<br><br>Procedure continued as for intervention | <b>Relevant measures &amp; outcomes</b><br><br>Primary outcomes<br><br><b>ED attendance</b><br><b>Hospital admissions within 28 days</b><br><b>Time of call to time of discharge</b><br><b>Patient satisfaction survey including the EQ-5D</b><br><br>Secondary outcomes<br><br><b>Subsequent unplanned contact with secondary care at 28 days</b><br><br><b>Mortality at 28 days</b> | Intervention vs. control<br><br>Primary outcomes<br><b>ED attendance (28 days)</b><br>970 (62.6%) vs. 1286 (87.5%)<br>p<0.001<br><br><b>Hospital admissions (28 days)</b><br>626 (40.4%) vs. 683 (46.5%)<br>p<0.001<br><br><b>Mean Time of call (SD) to time of discharge in mins</b><br>235.1(183.3) vs. 277.8(182.6)<br>p<0.001<br><br><b>Patient satisfaction survey including the EQ-5D</b><br>Very satisfied with care 656 (85.5%)vs.528 (73.8%)<br>p<0.001<br><br>Secondary outcomes<br><br><b>Subsequent unplanned contact with secondary care</b><br>330(21.3%) vs. 259 (17.6%)<br>p<0.01<br><br><b>Mortality at 28days</b><br>68(4.4%) vs.74(5%) p=0.41 |

| Author<br>Year<br>Country | Study                                                                                                                                                                                          | Participants                                                                                                                                                                                                                                                                                                                                              | Intervention                                                                                                                                                                                                                                                                                                                                      | Control                                                                                                                                                                                                                                                                                                                                                                                                                                                                                                  | Outcomes assessed                                                                                                                                                                                                                                                        | Results                                                                                                                                                                                                                                                                                                                                                                                                                                                                   |
|---------------------------|------------------------------------------------------------------------------------------------------------------------------------------------------------------------------------------------|-----------------------------------------------------------------------------------------------------------------------------------------------------------------------------------------------------------------------------------------------------------------------------------------------------------------------------------------------------------|---------------------------------------------------------------------------------------------------------------------------------------------------------------------------------------------------------------------------------------------------------------------------------------------------------------------------------------------------|----------------------------------------------------------------------------------------------------------------------------------------------------------------------------------------------------------------------------------------------------------------------------------------------------------------------------------------------------------------------------------------------------------------------------------------------------------------------------------------------------------|--------------------------------------------------------------------------------------------------------------------------------------------------------------------------------------------------------------------------------------------------------------------------|---------------------------------------------------------------------------------------------------------------------------------------------------------------------------------------------------------------------------------------------------------------------------------------------------------------------------------------------------------------------------------------------------------------------------------------------------------------------------|
| Gray<br>2008<br>UK        | <b>COS with historical controls</b><br><br><b>Intervention:</b><br>Emergency care practitioner (ECP) intervention<br>n=233<br><br><b>Control:</b><br>Historical control group from ED<br>n=772 | The study included two groups of patients a) those with breathing difficulties & b) elderly patients >65yrs with a fall. The latter only is reported here.<br><br><b>Inclusion criteria:</b><br>Elderly patients >65yrs with a fall.<br><b>Exclusion criteria:</b><br>None given<br><br><b>Baseline characteristics of participants</b><br><br>None given | <b>Outline of intervention</b><br><br>Jan-April 2006 inclusive, all the patients seen by the ECP service who had rung 999 and were an elderly patient (>65yrs) with a fall were reviewed. Each patient seen by an ECP was searched for in the hospital records for ED attendance or admissions in 72 h and 28 days following attendance by an ECP | <b>Outline of control</b><br>Comparison data taken Jan- April 2005 inclusive for attendances to same ED for patients with the same criteria as above & seen by non-ECP ambulance service personnel. These dates were chosen because, during this time, the ECP service was not tasked to patients with breathing difficulties and Yorkshire Ambulance Service had only 12 operational ECPs during this comparison period compared with 24 whole-time equivalent operational ECPs during the study period | <b>Relevant measures &amp; outcomes</b><br><br>Outcome on initial contact:<br><br><b>Treated at and stayed home</b><br><br><b>ED and or admitted</b><br><br>At 72hrs & 28 days<br><b>At home</b><br><b>ED attendance</b><br><b>Admission</b><br><br><b>Costs</b><br>None | <b>ECP vs. ED</b><br><br>Outcome on initial contact:<br><b>Stayed at home (PC referral)/went home</b><br>171 vs. 369<br>(73% vs. 48% avoidable admission rate)<br><br><b>At 72hr:</b><br>21/171 (intervention grp) attended ED and or were admitted<br><br><b>At 28 days:</b><br>A further 19 (intervention grp) attended ED and or were admitted<br><br>Avoidable admission rate (intervention grp) at 28 days was 56% ( 17% better) compared to control group<br>p<0.05 |

1  
2  
3  
4  
5  
6  
7  
8  
9  
10  
11  
12  
13  
14  
15  
16  
17  
18  
19  
20  
21  
22  
23  
24  
25  
26  
27  
28  
29  
30  
31  
32  
33  
34  
35  
36  
37  
38  
39  
40  
41  
42  
43  
44  
45  
46  
47  
48  
49

| Author<br>Year<br>Country   | Study                                                                                                                                                                                             | Participants                                                                                                                                                                                                                                                                                                                                                                                                                                                                                                                                                                                                                                                                                                                                                | Intervention | Control   | Outcomes assessed                                                                                                                                                                                                                                                                                                                                                                                                                                                                                                                                                                                     | Results                                                                                                                                                                                                                                                                                                                                                                                                                                                                                              |
|-----------------------------|---------------------------------------------------------------------------------------------------------------------------------------------------------------------------------------------------|-------------------------------------------------------------------------------------------------------------------------------------------------------------------------------------------------------------------------------------------------------------------------------------------------------------------------------------------------------------------------------------------------------------------------------------------------------------------------------------------------------------------------------------------------------------------------------------------------------------------------------------------------------------------------------------------------------------------------------------------------------------|--------------|-----------|-------------------------------------------------------------------------------------------------------------------------------------------------------------------------------------------------------------------------------------------------------------------------------------------------------------------------------------------------------------------------------------------------------------------------------------------------------------------------------------------------------------------------------------------------------------------------------------------------------|------------------------------------------------------------------------------------------------------------------------------------------------------------------------------------------------------------------------------------------------------------------------------------------------------------------------------------------------------------------------------------------------------------------------------------------------------------------------------------------------------|
| Mason<br><br>2012<br><br>UK | <b>COS</b><br><br><b>Intervention:</b><br>Five teams of Emergency Care Practitioners (ECP) n= 256 for care home cohort<br><b>Control:</b><br>Five usual care providers n=201 for care home cohort | <b>Inclusion criteria:</b><br>Informed consent was obtained from all study participants prior to recruitment. Within each pair of services all patients presenting with emergency or urgent complaints that were eligible to be seen by ECPs and presented to either the intervention or the control services between May 2006 and August 2007 were included in the trial.<br><b>Exclusion criteria:</b><br>No detail<br><br><b>Baseline characteristics of participants</b><br>(no stats given)<br>Care home cohort<br>Intervention vs. control<br><b>Mean age</b><br>83.5(10.40 vs. 84.5(8.5) yrs<br><br><b>% Female</b><br>68 vs.66%<br><br><b>Clinical complaint %</b><br>Adult medical 30 vs.41 %<br>Adult trauma 46 vs.13 %<br>Elderly falls 23vs.46% | No detail    | No detail | <b>Relevant measures &amp; outcomes</b><br><br>Using paired services<br><br>Primary outcomes<br><br><b>% of patients Discharged following consultation with no further follow up by any health professional</b><br><br><b>Urgently referred to hospital (both ED or direct admission)</b><br><br><b>Urgently referred to hospital (both ED or direct admission)</b><br><br><b>Non-urgently referred to GP or community care</b><br><br><b>Non-urgently referred to GP or community care</b><br><br>Secondary outcomes (relevant ones only)<br><br><b>Episode time from first contact to discharge</b> | <b>Discharged with no further follow up by any health professional</b><br>49.2 vs.12.4%<br>MD 36.8% (95% CI 26.7,46.8)<br><br><b>Urgently referred to hospital (both ED or direct admission)</b><br>22.7 vs. 87.6%<br>MD -64.9% (95% CI -71.8 , -58.0)<br><br><b>Non-urgently referred to GP or community care</b><br>28.1vs. 0%<br>28.1% (22.6,33.7)<br><br><b>Episode time from first contact to discharge median in mins (IQR)</b><br>60 (40,80) vs. 39 (29,58)<br>Time ratio<br>1.36 (1.24,1.49) |

ED Interventions (n=3)

| Author<br>Year<br>Country | Study                                                                                                                                           | Participants                                                                                                                                                                                                                                                                                                                                                                                                                                                                                                                                                                                                                                                                                                                                                                                                                                                                                                                                                                                                                                                                                                                                                                                                                                    | Intervention                                                                                                                                                                                                                                                                                                                                                                                                                                                                                                                                                                                                                                                                                                                                                                                                                                                                                                                                                                                                                                                                                                                                                                                                                                                                                                        | Control                                                                                                                                                                                                                                       | Outcomes assessed                                                                                                                                                                                                                                                                                                                   | Results                                                                                                                                                                                                                                                                                                                                                                                                                                                                                                                                                                                                                                                                                                                                                                                                                                                                               |
|---------------------------|-------------------------------------------------------------------------------------------------------------------------------------------------|-------------------------------------------------------------------------------------------------------------------------------------------------------------------------------------------------------------------------------------------------------------------------------------------------------------------------------------------------------------------------------------------------------------------------------------------------------------------------------------------------------------------------------------------------------------------------------------------------------------------------------------------------------------------------------------------------------------------------------------------------------------------------------------------------------------------------------------------------------------------------------------------------------------------------------------------------------------------------------------------------------------------------------------------------------------------------------------------------------------------------------------------------------------------------------------------------------------------------------------------------|---------------------------------------------------------------------------------------------------------------------------------------------------------------------------------------------------------------------------------------------------------------------------------------------------------------------------------------------------------------------------------------------------------------------------------------------------------------------------------------------------------------------------------------------------------------------------------------------------------------------------------------------------------------------------------------------------------------------------------------------------------------------------------------------------------------------------------------------------------------------------------------------------------------------------------------------------------------------------------------------------------------------------------------------------------------------------------------------------------------------------------------------------------------------------------------------------------------------------------------------------------------------------------------------------------------------|-----------------------------------------------------------------------------------------------------------------------------------------------------------------------------------------------------------------------------------------------|-------------------------------------------------------------------------------------------------------------------------------------------------------------------------------------------------------------------------------------------------------------------------------------------------------------------------------------|---------------------------------------------------------------------------------------------------------------------------------------------------------------------------------------------------------------------------------------------------------------------------------------------------------------------------------------------------------------------------------------------------------------------------------------------------------------------------------------------------------------------------------------------------------------------------------------------------------------------------------------------------------------------------------------------------------------------------------------------------------------------------------------------------------------------------------------------------------------------------------------|
| Sun<br>2014<br>USA        | <b>RCT</b><br><br><b>Intervention:</b><br>ED observation syncope protocol<br>n=62<br><br><b>Control:</b><br>Normal In-patient admission<br>n=62 | <b>Inclusion criteria:</b><br>Patients aged ≥ 50 years or older diagnosed with intermediate syncope.<br><br><b>Exclusion criteria</b><br>Patients with a serious condition: symptomatic arrhythmias, myocardial infarction, pulmonary embolism, acute pulmonary edema, stroke, severe anaemia or blood loss requiring blood transfusion, sepsis, and major traumatic injury.<br>Also: seizure, head trauma, or intoxication as reason for loss of consciousness; new/ baseline cognitive impairment; do-not-resuscitate or do-not-intubate status; active chemotherapy and inability to speak either English/Spanish. Met high risk criteria.<br><b>Baseline characteristics of participants</b><br>Observation vs. control<br>Mean(SD) or%<br><b>Mean age</b><br>65 (11) vs. 64(11)<br><b>% Female</b><br>53 vs. 48<br><b>Syncope index complaint (vs near syncope)</b><br>74vs. 61%<br><b>Congestive heart failure</b><br>2vs. 3%<br><b>Coronary artery disease</b><br>13vs.8%<br><b>Arrhythmia</b> 8vs.6%<br><b>Syncope in previous yr</b><br>16vs.21%<br><b>Quality of well-being scale</b><br>0.55(0.15) vs. 0.55(0.14)<br><b>Syncope functional status</b><br>29(25) vs.25(26)<br><b>Syncope risk score</b><br>0.76 (0.840 vs.0.76 (0.67) | <b>Outline of intervention</b><br>Patients received continuous cardiac monitoring ≥ 12hrs. ≤2 serial cardiac troponin tests approx. 6 hours apart to exclude acute MI. Rest echocardiogram for patients with cardiac murmur, if not performed in previous 6mths. Additional testing as required. Maximum stay in observation unit could not be more than 24hrs. Observation protocol patients who received a diagnosis detailed in exclusion list or had pending tests at 24hrs were admitted<br><b>High Risk Criteria</b><br>Serious condition identified in the ED, History of ventricular arrhythmia, Cardiac device with dysfunction, Exertional syncope, Presentation concerning for acute coronary syndrome, Severe cardiac valve disease (e.g., aortic stenosis <1 cm2), Known cardiac ejection fraction <40%<br>Electrocardiogram findings of QTc>500 mS,pre-excitation, non-sustained ventricular tachycardia, Emergency physician judgment<br><b>Intermediate Risk Criteria</b> No high risk features <b>AND</b> No low risk features <b>AND</b> Clinical judgment by emergency physician that patient requires further diagnostic evaluation<br><b>Low Risk</b> Symptoms consistent with orthostatic or vasovagal syncope, Emergency physician judgment that no further diagnostic evaluation is needed. | <b>Outline of control</b><br>The syncope protocol was not used. Contamination between groups was minimized by being managed in distinct physical spaces by different clinical services.<br><br><b>Intervention delivered by:</b><br>No detail | <b>Relevant measures &amp; outcomes</b><br><br>Primary outcomes<br><b>Inpatient admission rates</b><br><b>Hospital LOS at indexed visit</b><br><br>Secondary outcomes<br><b>30 day and 6mth serious events</b><br><br><b>Index and 30 day hospital costs</b><br><b>30 days changes in QoL</b><br><b>30 day patient satisfaction</b> | <b>Observation vs. s care</b><br><b>Inpatient admission rates</b><br>9 (15%) vs. 57 (92%)<br><b>Relative rate 0.16 (95%CI 0.09,0.29, p&lt;0.001)</b><br><b>Hospital LOS at indexed visit mean SD (hrs) 29 (15) vs. 47hrs (34) (p&lt;0.001)</b><br><b>Serious events</b><br><b>During hospital visit</b><br>Death 0 vs. 0<br>Arrhythmia 2 vs. 2<br>Pacemaker insertion 1vs.1<br>Syncope with bone fracture 2 vs.1<br>30 days recurrent syncope 1 vs 1<br>30 day serious outcomes after discharge 2 vs. 0<br>6mth serious outcomes after hospital discharge 4 vs.5<br><b>Costs \$ (SD)</b><br>At index visit 1,400(1,220) vs.2,420(3,930)<br>Within 30 days 1,800(2,150) vs.2,520(3,980)<br><b>Change in quality of life</b> mean SD 0 (0.2) vs. 0.03 (0.18)<br><b>Change in syncope functional status</b> -7.6(20.1) vs.-2.4(26.3)<br><b>Patient satisfaction</b> 8.9(1.40 vs.9.3(0.9) |

| Author<br>Year<br>Country | Study                                                                                                                                        | Participants                                                                                                                                                                                                                                                                                                                                                                                                                                                                                                                                                                                                                                                                                                                                                                                                                                                                                                                                                                                                                                                                     | Intervention                                                                                                                                                                                                                                                                                                                                                                                                                                                                                                                                                                                                                                                                                                                                                                                                                                                                                                                                                                                                                                                                                                                                                                                                                                                                                                                 | Control                                                                                                                                                                                                                             | Outcomes assessed                                                                                                                                                                                                                                                                                                                                                                                                                                                                                                                                                                                                                | Results                                                                                                                                                                                                                                                                                                                                                                                                                                                                                                                                                                                                                                                                                                                                                                                                                                   |
|---------------------------|----------------------------------------------------------------------------------------------------------------------------------------------|----------------------------------------------------------------------------------------------------------------------------------------------------------------------------------------------------------------------------------------------------------------------------------------------------------------------------------------------------------------------------------------------------------------------------------------------------------------------------------------------------------------------------------------------------------------------------------------------------------------------------------------------------------------------------------------------------------------------------------------------------------------------------------------------------------------------------------------------------------------------------------------------------------------------------------------------------------------------------------------------------------------------------------------------------------------------------------|------------------------------------------------------------------------------------------------------------------------------------------------------------------------------------------------------------------------------------------------------------------------------------------------------------------------------------------------------------------------------------------------------------------------------------------------------------------------------------------------------------------------------------------------------------------------------------------------------------------------------------------------------------------------------------------------------------------------------------------------------------------------------------------------------------------------------------------------------------------------------------------------------------------------------------------------------------------------------------------------------------------------------------------------------------------------------------------------------------------------------------------------------------------------------------------------------------------------------------------------------------------------------------------------------------------------------|-------------------------------------------------------------------------------------------------------------------------------------------------------------------------------------------------------------------------------------|----------------------------------------------------------------------------------------------------------------------------------------------------------------------------------------------------------------------------------------------------------------------------------------------------------------------------------------------------------------------------------------------------------------------------------------------------------------------------------------------------------------------------------------------------------------------------------------------------------------------------------|-------------------------------------------------------------------------------------------------------------------------------------------------------------------------------------------------------------------------------------------------------------------------------------------------------------------------------------------------------------------------------------------------------------------------------------------------------------------------------------------------------------------------------------------------------------------------------------------------------------------------------------------------------------------------------------------------------------------------------------------------------------------------------------------------------------------------------------------|
| Benaiges<br>2014<br>Spain | <b>COS</b><br><br><b>Intervention:</b><br>'Day hospital' (DH)<br>n=64<br><br><b>Control:</b><br>Conventional<br>hospitalisation (CH)<br>n=36 | <b>Inclusion criteria:</b><br><br>Patients with sustained<br>hyperglycemia (>300 mg/dL) for at<br>least 3 days with or without<br>ketosis<br><br><b>Exclusion criteria</b><br>Ketoacidosis (venous pH <7.31<br>and/or HCO <sub>3</sub> <22 mEq),<br>hyperosmolar crisis (glycemia >600<br>mg/dL and effective plasma<br>osmolarity >320 mOsm/L),<br>unstable hemodynamic status or<br>need for ventilatory support,<br>severe precipitating factors such as<br>acute myocardial infarction,<br>stroke, sepsis, social deprivation,<br>and dependence for four or more<br>activities of daily living (Katz index<br>>D).<br><br><b>Baseline characteristics of<br/>participants<br/>(Stats shown if signif)</b><br>DH vs.CH<br><b>Age</b><br>80.3(4.8)vs. 80.6(4.6)yrs<br><b>Female</b><br>67 vs. 56%<br><b>BMI</b><br>26.1(4.9)vs.25.5(5.1)<br><b>Katz A&amp;B</b><br>72.2vs.72.2%<br><b>Charlson Index</b><br>3.2(2.0)vs. 3.3(1.7)<br><b>Family support</b><br>88.1 vs.97.1%<br><b>Diabetes duration</b><br>14.4 (8.0) vs. 97.1 yrs<br>Plus other specific diabetes<br>measures | <b>Outline of intervention</b><br>Patients assigned to DH if<br>admitted to hospital<br>within DH opening hours<br>(week days 8 am -4 pm);<br>otherwise they were<br>treated in ED and<br>subsequently<br>hospitalized.<br>After initial treatment of<br>hyperglycemic crisis DH<br>patients were scheduled<br>for follow-up visits at 24,<br>72 hours, and 7 days to<br>adjust treatment and to<br>complete their diabetes<br>education<br><br>Patients were treated<br>with same protocol for<br>both DH and CH: this<br>included initial evaluation<br>with a blood test,<br>urinalysis, chest<br>radiograph to rule out<br>underlying infectious<br>disease, and hourly<br>measurement of glycemia<br>and ketonemia.<br>Treatment included<br>hydration as required, an<br>insulin regimen with<br>insulin, and oral<br>carbohydrate intake if<br>glucose levels were less<br>than 250 mg/dL with<br>persistent ketosis. If<br>infection was diagnosed,<br>treatment was initiated.<br>Diabetes education was<br>delivered by specialist<br>diabetes nurse with<br>specific attention paid to<br>dietary advice, physical<br>activity, and recognition<br>of hypoglycemia.<br>Measurement of glycated<br>hemoglobin (HbA1c) and<br>clinical evaluation was<br>scheduled for 3 & 6 mths<br>for patients in both<br>groups | <b>Outline of control</b><br>At hospital discharge, CH<br>patients were scheduled<br>for a one-week follow-up<br>visit in outpatient clinic.<br><br><b>Intervention delivered<br/>by:</b><br>Unclear but normal<br>outpatient staff | <b>Relevant measures &amp;<br/>outcomes</b><br>(no distinguishing between<br>primary and secondary<br>outcomes )<br><br>At 3 mth follow up<br><br><b>[No. of mild or severe<br/>hypoglycemic episodes ]</b><br><br><b>Readmissions for diabetes<br/>or unrelated cause</b><br><br><b>[Nosocomial complications<br/>]</b><br><br><b>No. of outpatient visits</b><br><br><b>No. of ER visits</b><br><br>[outcomes] not detailed as<br>not relevant to our question<br><br><b>Costs</b><br><br><b>Initial care<br/>Complementary<br/>examinations<br/>Pharmacy<br/>Outpatient visits<br/>Readmissions<br/>Total</b><br><br>In euros | Mean (SD)<br>DH vs.CH<br><b>Readmissions for diabetes (%)</b><br><b>1(1.6)vs. 5 (13.9)</b><br><b>P=0.04</b><br>Readmission for any cause (%)<br>4(6.3)vs.7(19.4) p=0.085<br><b>No. of outpatient visits (SE?)</b><br><b>5.0(2.2)vs. 2.5(2.0)</b><br><b>p=0.012</b><br>No. of ER visits (SE?)<br>0.2(0.6)vs.0.2(0.4)<br>P=0.59<br><b>Costs</b><br><b>Initial care</b><br><b>580.2(489.1) vs.</b><br><b>2,013.6(790.4) p&lt;0.001</b><br><b>Complementary examinations</b><br><b>123.7(276.3) vs. 281.3(188.1)</b><br><b>p=0.007</b><br>Pharmacy<br>12.8(95.6)vs. 20.3(24.8)<br>P=0.676<br>Outpatient visits<br><b>116.7(75.3) vs. 56.9(105.7)</b><br><b>p=0.003</b><br><b>Readmissions (total)</b><br><b>340.8(1190)vs.288.3(916.8)p=</b><br><b>0.835</b><br><b>Total</b><br><b>1,345.1(793.6) vs.</b><br><b>2,212.4(982.5) p&lt;0.001</b> |

| Author<br>Year<br>Country                                                                                                                             | Study                  | Participants                                                                                                                                                                  | Intervention                                                                                                                                                                                                                                                                                                                                                                                                                                                                                                                                                                                                                                                                                                                                                                                                                                                                                                                                                             | Control                                                                                                                            | Outcomes assessed                                                                                                                                                                                                                                                                                                                                                                            | Results                                                                                                                                                                                                                                                                                                                                                                                                                                                                                                                                |                                                                                                                                                                                                                                                                                                                                                                                                                                                                                                                                                                                                                                                                                                                                                                      |
|-------------------------------------------------------------------------------------------------------------------------------------------------------|------------------------|-------------------------------------------------------------------------------------------------------------------------------------------------------------------------------|--------------------------------------------------------------------------------------------------------------------------------------------------------------------------------------------------------------------------------------------------------------------------------------------------------------------------------------------------------------------------------------------------------------------------------------------------------------------------------------------------------------------------------------------------------------------------------------------------------------------------------------------------------------------------------------------------------------------------------------------------------------------------------------------------------------------------------------------------------------------------------------------------------------------------------------------------------------------------|------------------------------------------------------------------------------------------------------------------------------------|----------------------------------------------------------------------------------------------------------------------------------------------------------------------------------------------------------------------------------------------------------------------------------------------------------------------------------------------------------------------------------------------|----------------------------------------------------------------------------------------------------------------------------------------------------------------------------------------------------------------------------------------------------------------------------------------------------------------------------------------------------------------------------------------------------------------------------------------------------------------------------------------------------------------------------------------|----------------------------------------------------------------------------------------------------------------------------------------------------------------------------------------------------------------------------------------------------------------------------------------------------------------------------------------------------------------------------------------------------------------------------------------------------------------------------------------------------------------------------------------------------------------------------------------------------------------------------------------------------------------------------------------------------------------------------------------------------------------------|
| 1<br>2<br>3<br>4<br>5<br>6<br>7<br>8<br>9<br>10<br>11<br>12<br>13<br>14<br>15<br>16<br>17<br>18<br>19<br>20<br>21<br>22<br>23<br>24<br>25<br>26<br>27 | Salvi<br>2008<br>Italy | <b>Study</b><br><b>COS</b><br><b>(secondary analysis)</b><br><br><b>Intervention:</b><br>Geriatric ED (GED)<br>n=100<br><br><b>Control:</b><br>Conventional ED (CED)<br>n=100 | <b>Participants</b><br><b>Inclusion criteria:</b><br>Patients aged ≥ 65yrs were enrolled in June 2006 from the GED and July 2006 from the CED taking care that none presenting to the ED in the course of the study period was recruited again.<br><br><b>Exclusion criteria</b><br>Cognitive impairment (a score of ≥5 on the Short Portable Mental Status Questionnaire SPMSQ) and no proxy, Those too ill to respond, Trauma patients<br><br><b>Baseline characteristics of participants</b><br>CED vs GED<br>Mean(SD)<br><b>Age 78.1(7) vs.82.5(7.20 p&lt;0.001</b><br><b>Female 47 vs. 68% p&lt;0.001</b><br><b>Married 70 vs. 40% p&lt;0.001</b><br>Living alone 12 vs 14<br><b>Triage code</b><br>Urgent/semi-urgent (2/3)<br>97 vs.90 %<br>Charlson Index 3.3(2.3) vs. 3.4(1.7)<br><b>SPMSQ</b><br><b>2.5(3.3) vs. 5.2(4.2) p&lt;0.001</b><br><b>ADL4.3(2) vs. 3.2(2.5)</b><br><b>P=0.001</b><br><br>No differences in profile of diagnosis in ED between groups | <b>Intervention</b><br>No details beyond ED plus observation unit of 6 beds<br><br><b>Intervention delivered by:</b><br>No details | <b>Control</b><br>Patients presenting to ED were screened Mon-Fri 9am- 6pm using standard information sheet. Interviews conducted with patients or family member/other for patients with cognitive impairment. Written consent & access to medical records was obtained. patients a underwent a brief geriatric assessment using the Charlson Index, SPMSQ, and ADL before the current event | <b>Outcomes assessed</b><br><b>Relevant measures &amp; outcomes</b><br><br><b>Mean duration (SD)</b><br><br><b>No. of initial admissions</b><br><br><b>LOS in hospital days</b><br><br><b>Both of above presented as baseline data</b><br><br><b>No. ED visits at 30 days and 6 mths</b><br><br><b>Frequent ED return (≥3 visits over 6 mths)</b><br><br><b>No. hospital admissions at 6mths</b><br><br><b>ADL at 6mths (defined as functional decline</b><br><br><b>Mortality at 30 days &amp; 6 mths</b><br><br><b>Costs</b><br>None | <b>Results</b><br>CED vs. GED<br><b>Mean duration (SD)</b><br><b>6.2(4.5) hrs vs. 12.8 (8.5) hrs</b><br><b>P&lt;0.001</b><br><b>No. of initial admissions</b><br>53 vs.63 p=0.2<br><b>LOS in days</b><br>10(6.65) vs. 10.5(7.2) p=0.74<br><b>No. ED visits</b><br>30 days<br>25 vs. 23 visits p=0.88<br>6months<br>51 vs. 42 p=0.25<br><b>Frequent ED return (≥3 visits over 6 mths)</b><br>11 vs.13 visits p=0.84<br><b>No. hospital admissions at 6mths</b><br>36 vs.29 p=0.2<br><b>ADL 20 vs. 20 p=0.34</b><br><b>Mortality</b><br><b>30 days 8 vs. 5 deaths</b><br><b>6months 20 vs. 19</b><br>Statistically significant at 6mths after adjustment for age, sex, living status, admission at time of recruitment Charlson index, SPMSQ and ADL<br><b>p=0.047</b> |

## Community hospital (n=2)

| Author<br>Year<br>Country     | Study                                                                                                                                                                         | Participants                                                                                                                                                                                                                                                                                                                                                                                                                                                                                                                                                                                                                                                                                                                                                                                                                                                                                                                                                                                                                                                                   | Intervention                                                                                                                                                                                                                                                                                                                                                                                                                                                                                                                                                                                                                                                                                                                                                                                                                                                                                                                                                                                                                                                                                          | Control                                                                                                                                                                                           | Outcomes assessed                                                                                                                                                                                                                                                                                                                                                                                                                                                                                                                                                 | Results                                                                                                                                                                                                                                                                                                                                                                                                                                                                                                                                                                                                                                                                                                                                                                                                         |
|-------------------------------|-------------------------------------------------------------------------------------------------------------------------------------------------------------------------------|--------------------------------------------------------------------------------------------------------------------------------------------------------------------------------------------------------------------------------------------------------------------------------------------------------------------------------------------------------------------------------------------------------------------------------------------------------------------------------------------------------------------------------------------------------------------------------------------------------------------------------------------------------------------------------------------------------------------------------------------------------------------------------------------------------------------------------------------------------------------------------------------------------------------------------------------------------------------------------------------------------------------------------------------------------------------------------|-------------------------------------------------------------------------------------------------------------------------------------------------------------------------------------------------------------------------------------------------------------------------------------------------------------------------------------------------------------------------------------------------------------------------------------------------------------------------------------------------------------------------------------------------------------------------------------------------------------------------------------------------------------------------------------------------------------------------------------------------------------------------------------------------------------------------------------------------------------------------------------------------------------------------------------------------------------------------------------------------------------------------------------------------------------------------------------------------------|---------------------------------------------------------------------------------------------------------------------------------------------------------------------------------------------------|-------------------------------------------------------------------------------------------------------------------------------------------------------------------------------------------------------------------------------------------------------------------------------------------------------------------------------------------------------------------------------------------------------------------------------------------------------------------------------------------------------------------------------------------------------------------|-----------------------------------------------------------------------------------------------------------------------------------------------------------------------------------------------------------------------------------------------------------------------------------------------------------------------------------------------------------------------------------------------------------------------------------------------------------------------------------------------------------------------------------------------------------------------------------------------------------------------------------------------------------------------------------------------------------------------------------------------------------------------------------------------------------------|
| Garåsen<br>2007/8ab<br>Norway | <b>RCT</b><br><br><b>Intervention:</b><br>Community hospital (CH)<br>n=72 assigned but 8 went<br>on to GH<br><br><b>Control:</b><br>General hospital<br>(GH)admission<br>n=70 | <b>Inclusion criteria:</b><br>Patients aged ≥60 years admitted<br>to general hospital due to acute<br>illness or acute exacerbation of<br>known chronic disease<br><br>Probably in need of in ward care<br>for ≥ 3-4 days<br><br>Admitted from own homes and<br>expected to return home when<br>care finished.<br><br><b>Exclusion criteria</b><br>Severe dementia or a psychiatric<br>disorders needing specialised care<br>24 hours a day.<br><br><b>Baseline characteristics of<br/>participants<br/>(No stats given)</b><br>[including data from<br>n=8 who were assigned CH then<br>went to GH]<br><br>CH vs.GH<br><b>Age</b><br>80.6 (0.8)vs. 81.3(0.8)yrs<br><b>Female</b><br>72 vs.61%<br><b>Living with spouse</b><br>16 vs. 15<br><b>ADL (SD)</b><br>2.24(0.9) vs. 2.05 (0.7)<br><b>Primary diagnosis</b><br><b>Cardio dis</b> 31 vs.29%<br><b>Infect</b> 18vs. 23%<br><b>Fractures/contusions</b><br>19vs. 17%<br><b>Pulmonary disease</b><br>7vs.9%<br><b>Neurological</b> 7 vs.6%<br><b>Cancer</b> 3 vs 6%<br><b>Psychiatric</b> 1vs.0%<br><b>Other</b> 14 vs 11% | <b>Outline of intervention</b><br>On admission to CH the<br>physicians<br>performed a medical<br>examination of the patients<br>and a<br>careful evaluation of<br>available earlier health<br>records from<br>the <b>admitting general<br/>practitioner, the general<br/>hospital physicians and the<br/>community home care<br/>services.</b> The<br>communication with each<br>patient and his family<br>focusing on physical and<br>mental challenges was also<br>essential to understand the<br>needs and level of care.<br><br>Assume from the inclusion<br>criteria that all patients<br>came to the general hospital<br>initially then<br><br>‘ When an eligible patient<br>was identified and accepted<br>for inclusion, a blinded<br>randomisation was<br>performed by the<br>Clinical Research<br>Department at the Faculty<br>of Medicine.’<br><br>All patients randomised for<br>care at the community<br>hospital were transferred<br>from the general<br>hospital within 24 hours<br>after the time of inclusion to<br>the study and immediately<br>after the time of<br>randomisation. | <b>Outline of control</b><br>The care at different<br>departments at GH and<br>communication with<br>primary health care<br>followed the standard<br>routines through the<br>formal organisation. | <b>Relevant measures &amp;<br/>outcomes</b><br><br>Follow up at 26 weeks & 12<br>months<br><br><b>No. of readmission for<br/>index disease</b><br><br><b>Need for community home<br/>care</b><br><br><b>Need for long term nursing<br/>home</b><br><br><b>No. of days in institutions<br/>after randomisation<br/>[intervention +rehab<br/>+readmissions] data is<br/>available for separate<br/>services</b><br><br><b>No. of deaths</b><br><br><b>No. of days before death</b><br><br><b>No care</b><br><br>12 month data in [0273]<br><br><b>Costs</b><br>None | CH vs. GH No. (%)<br>At 26 weeks<br><b>No. of readmission for index<br/>disease</b><br><b>14(19%) vs. 25 (36%) p=0.02</b><br><b>Need for community home<br/>care</b><br>38(53%) vs. 44(63%) p=0.37<br><b>Need for long term nursing<br/>home</b><br>7(10%) vs. 5(7%)<br>p= 0.76<br><b>No. days in institutions</b><br>31(95% CI 26.1,34.7) vs.29.8<br>(95% CI 23.2,36.4) p=0.80<br><b>No. of deaths</b><br>9(12.5%) vs14(20%) p=0.15<br><b>No. days before death</b><br>165 (95% CI 154-176) vs. 156<br>(95% CI 144,165)<br><b>No care</b><br><b>18(25%) vs. 7(10%) p=0.01</b><br>12 month data<br><b>No. of deaths</b><br><b>13(18.1%) vs. 22 (31.4%)</b><br><b>p=0.03</b><br><b>Total observation period</b><br><b>335.7(95% CI 312.0,359.4) vs.</b><br><b>292.8(95%CI 264.1,321.5)</b><br><b>days p=0.01</b> |



| Author<br>Year<br>Country | Study                                                                                                                         | Participants                                                                                                                                                                                                                                                                                                                                                                                                                                                                                                                                                                                                                                                                  | Intervention                                                                                                                                                                                                                                                                                                                                                                                                                                                                                                                                                                                                                                                                                                                                                                                                                                                                                                                                               | Control                                                                                                                                                                               | Outcomes assessed                                                                                                                                                                                                                                                                                                                                   | Results                                                                                                                                                                                                                                                                                   |
|---------------------------|-------------------------------------------------------------------------------------------------------------------------------|-------------------------------------------------------------------------------------------------------------------------------------------------------------------------------------------------------------------------------------------------------------------------------------------------------------------------------------------------------------------------------------------------------------------------------------------------------------------------------------------------------------------------------------------------------------------------------------------------------------------------------------------------------------------------------|------------------------------------------------------------------------------------------------------------------------------------------------------------------------------------------------------------------------------------------------------------------------------------------------------------------------------------------------------------------------------------------------------------------------------------------------------------------------------------------------------------------------------------------------------------------------------------------------------------------------------------------------------------------------------------------------------------------------------------------------------------------------------------------------------------------------------------------------------------------------------------------------------------------------------------------------------------|---------------------------------------------------------------------------------------------------------------------------------------------------------------------------------------|-----------------------------------------------------------------------------------------------------------------------------------------------------------------------------------------------------------------------------------------------------------------------------------------------------------------------------------------------------|-------------------------------------------------------------------------------------------------------------------------------------------------------------------------------------------------------------------------------------------------------------------------------------------|
| Vicente<br>2014<br>Sweden | <b>RCT</b><br><b>Intervention:</b><br>Going to a community-based hospital<br>n=410<br><b>Control:</b><br>Going to ED<br>n=396 | <b>Inclusion criteria:</b><br>No specific information<br><b>Exclusion criteria:</b><br>No specific information<br><br>older adults were randomized when they called the emergency number<br><br><b>Baseline characteristics of participants</b><br>Intervention vs. control<br><br><b>Mean age (SD)</b><br>81 (8) vs. 81(8) yrs<br><b>% Female</b><br>56 vs. 59%<br><b>Priority level when ambulance sent out (% individuals)</b><br><b>1. 1.6 vs. 0%</b><br><b>2. 59 vs. 47 %</b><br><b>3. 39 vs.53%</b><br><b>P=0.001</b><br><b>Priority level when ambulance arrives at hospital (% individuals)</b><br><b>1. 7.2 vs.3.6%</b><br><b>2. 39 vs.35%</b><br><b>3.54 vs.61%</b> | <b>Outline of intervention</b><br>The study was conducted over 14 months from Oct 2008 to Dec 2009. Two EMS companies were included in the study. Ambulance personnel at Company 1 had training in and access to the system and tool and could triage eligible individuals to a GW or, a CECC at a CH. By following system and tool & after assessment of the individual's medical situation and care needs, the ambulance nurse was able to decide whether the individual required full ED services or would benefit more from being transported to an assessment at the CH instead.<br><b>Delivered by:</b><br>The ambulance nurse education are required to have a course of 60 credits includes ≥ 30 credits in Caring Science. The criterion for entering this program is a BSc Caring Science and Nursing. Since 2007, a 1-year Master's Degree & postgraduate Diploma in Specialist Nursing, Prehospital Emergency Care Program has been available. | <b>Outline of control</b><br><br>Ambulance personnel at Company 2 had no training in the system and tool, and transported all individuals to a full-service ED at a tertiary hospital | <b>Relevant measures &amp; outcomes</b><br><br>Primary outcome:<br><b>No. of individuals sent direct to CH for either to GW or CECC</b><br><br><b>Secondary outcome:</b><br><b>No. of subsequent transfers from CH to ED within 24 hrs</b><br><br>Calculated as Intention to treat (ITT) and per protocol (pp) analysis<br><br><b>Costs</b><br>None | Intervention vs. control<br><b>No. of individuals sent direct to CH for either to GW or CECC</b><br>ITT<br>90/449 20% (16.6,24)<br>PP<br>56/273 20.5% (16.1,25.7)<br><b>No. of subsequent transfers from CH to ED within 24 hrs</b><br>ITT 6/90 6.7% (3.1,13.8)<br>PP 4/56 7.1 (2.8,17.0) |

## Hospital at home for community dwelling older people (n=9)

| Author<br>Year<br>Country                        | Study                                                                                                                                                                                                    | Participants                                                                                                                                                                                                                                                                                                                                                                                                                                                                                                                                                                                                                                                                                                                                                                                                                                                                                                                                                                                                                                                                                                                                                                                                                                                                                                                                                                                                                                                                                                                                                                                                                                                                                                                                                                                                                                                                                                                                                                                                                                                                                                          | Intervention                                                                                                                                                                                                                                                                                                                                                                                                                                                                                                                                                                                                                                                                                                                                                                                                                                                                            | Control                                                                                       | Outcomes assessed                                                                                                                                                                                                                                                                                                                                                                                                                                                                                     | Results                                                                                                                                                                                                                                                                                                                                                                                                                                                                                     |
|--------------------------------------------------|----------------------------------------------------------------------------------------------------------------------------------------------------------------------------------------------------------|-----------------------------------------------------------------------------------------------------------------------------------------------------------------------------------------------------------------------------------------------------------------------------------------------------------------------------------------------------------------------------------------------------------------------------------------------------------------------------------------------------------------------------------------------------------------------------------------------------------------------------------------------------------------------------------------------------------------------------------------------------------------------------------------------------------------------------------------------------------------------------------------------------------------------------------------------------------------------------------------------------------------------------------------------------------------------------------------------------------------------------------------------------------------------------------------------------------------------------------------------------------------------------------------------------------------------------------------------------------------------------------------------------------------------------------------------------------------------------------------------------------------------------------------------------------------------------------------------------------------------------------------------------------------------------------------------------------------------------------------------------------------------------------------------------------------------------------------------------------------------------------------------------------------------------------------------------------------------------------------------------------------------------------------------------------------------------------------------------------------------|-----------------------------------------------------------------------------------------------------------------------------------------------------------------------------------------------------------------------------------------------------------------------------------------------------------------------------------------------------------------------------------------------------------------------------------------------------------------------------------------------------------------------------------------------------------------------------------------------------------------------------------------------------------------------------------------------------------------------------------------------------------------------------------------------------------------------------------------------------------------------------------------|-----------------------------------------------------------------------------------------------|-------------------------------------------------------------------------------------------------------------------------------------------------------------------------------------------------------------------------------------------------------------------------------------------------------------------------------------------------------------------------------------------------------------------------------------------------------------------------------------------------------|---------------------------------------------------------------------------------------------------------------------------------------------------------------------------------------------------------------------------------------------------------------------------------------------------------------------------------------------------------------------------------------------------------------------------------------------------------------------------------------------|
| Patel<br>2008<br><br>Sweden<br><br>Heart Failure | <p>trial RCT</p> <p><b>Intervention:</b> HC<br/>Treated at home after &gt;48hrs treatment in ED (n=13)</p> <p><b>Control:</b> CC<br/>Treated in hospital as per hospital treatment guidelines (n=18)</p> | <p><b>Inclusion criteria:</b><br/><i>Into study</i><br/>Earlier diagnosed with CHF with diastolic or systolic LVD<br/>Deterioration of HF ≥3 days with symptoms of increasing dyspnoea, orthopnoea, weight gain ≥2 kg, debuting peripheral oedema or abdominal swelling<br/>Clinical signs, e.g., extended jugular vein, leg oedema, tachypnoea, pulmonary rales, ascites and third heart sound. At least one symptom and one sign should be present<br/>New York Heart Association class II–IV<br/><i>for home treatment</i><br/>It was considered medically safe to treat patients at home if they had a S-Potassium level 3.4–5.5 mmol/L, systolic blood pressure &gt;95 mm Hg, S-Creatinine &lt;250 μmol/L &amp; &lt;50% increase from the baseline value during drug adjustment.</p> <p><b>Exclusion criteria</b><br/>Unwillingness to participate<br/>Worsening of CHF &lt;3 days<br/>Newly onset HF, Pulmonary or pre-pulmonary oedema, Need for monitoring of arrhythmia<br/>Other morbidities indicating need for hospitalisation. Living at an institution.<br/>Inability to follow instructions-<br/>Haemoglobin &lt;100 g/L or a decrease of S-Haemoglobin &gt;20 g/L<br/>S-Creatinine &gt;250 μmol/L<br/>S-Potassium &gt;5.5 mmol/L or b3.4 mmol/L<br/>S-Troponin T &gt;0.05 μg/L<br/>Creatine kinase-MB &gt;5 μg/L<br/>ASAT and ALAT &gt;three times above the normal value. Systolic blood pressure &gt;95 mm Hg Heart rate &lt;45 or &gt;110 beats/min</p> <p><b>Baseline characteristics of participants</b><br/>Male n (%) 6 (46)/7 (54) 15 (83)/3 (17)<br/>0.03 Age (years) mean (SD) 77 (10) 78 (8)<br/>ns Marital status n (%) Divorced 2 (15) 3 (17) ns Single 1 (8) 2 (11) ns Widowed 7 (54) 5 (28) ns Education n (%) ≥9 years 1 (8) 8 (44) 0.02 ns Weight kg mean (SD) 71 (13) 79 (15) ns NT-proBNP pg/ml (median and interquartile range) 4420 (1690–14350) 9335 (3375–13350) ns LVEF % mean (SD) 36 (13) 33 (12)<br/>Preserved ejection fraction CHF n (%) 3 (23) 2 (11) Systolic CHF n (%) 10 (77) 16 (89) NYHA class n (%) III 1 (5.5) III 13 (100) 16 (89) IV 1 (5.5)<br/>truncated</p> | <p><b>Outline of intervention</b><br/>Initially treated in the ED for ≥48 h &amp; then sent home. The specialist HF nurses followed a written physician directed care plan including adjusting medications. A cardiologist could be consulted. All patients followed-up one day after returning home by nurse. The patients were visited daily or every other day for 5–7 days as appropriate. The home visits stopped when: (1) was symptomatically stable or improving, (2) had stable or falling weight, (3) had no signs of pulmonary rales and (4) had no oedema above the ankle. Patients could contact nurse by phone in office hours. Nurses at intensive cardiac care unit could be reached by telephone after office hours. A cardiologist was always available for phone consultation ≤1 month after the last home visit, the nurse was available for phone counselling.</p> | <p><b>Outline of control</b><br/>Treated in hospital as per hospital treatment guidelines</p> | <p><b>Relevant measures &amp; outcomes</b><br/><br/>No distinction between primary and secondary outcomes<br/><br/><b>Clinical status</b> was documented at 1,4,8&amp; 12 mths<br/><br/><b>Direct costs</b> for control group based on compensation paid to hospital and for home care group based on time &amp; activities of nurses &amp; physicians plus lab tests and i.v diuretic episodes<br/><br/><b>Readmissions</b> from hospital data (presumably up to 12mths – not listed in methods)</p> | <p>There was no significant difference in clinical events including readmissions adverse events or in HRQL (measured at baseline too).</p> <p>The total cost related to CHF was lower in the HC group after 12 months (p=0.05)<br/>detail of costs<br/>Euros HC vs. CC<br/>Nurse cost 386 (244-1107) vs. N/A<br/>Physician 35(19-74) vs. N/A<br/>Transport 96953-127) vs. N/A<br/>Total cost for care 586 (334-1125) vs. 3277 (2125-5750)</p> <p>Readmissions 0.5(0.8) vs. 0.6 (0.8) ns</p> |

| Author<br>Year<br>Country                                                       | Study                                                                                                                                                                 | Participants                                                                                                                                                                                                                                                                                                                                                                                                                                                                                                                                                                                                                                                                                                                                                                                                                                                                                                                                                                                                                                                                                                                                                                                                                                                                                                                                                                                                                                                                                                                                                                                                                                                | Intervention                                                                                                                                                                                                                                                                                                                                                                                                                                                                                                                                                                                                                                                                                                                                                                                                                                                                                                                                                                                                                                                                                                                          | Control                                                                                                                                                                                                          | Outcomes assessed                                                                                                                                                                                                                                                                                                                                                                                                                                                                                                                                                                                                                                                                                                                                                                                                                                                                                                                                                                                                                 | Results                                                                                                                                                                                                                                                                                                                                                                                                                                                                                                                                                                                                                           |
|---------------------------------------------------------------------------------|-----------------------------------------------------------------------------------------------------------------------------------------------------------------------|-------------------------------------------------------------------------------------------------------------------------------------------------------------------------------------------------------------------------------------------------------------------------------------------------------------------------------------------------------------------------------------------------------------------------------------------------------------------------------------------------------------------------------------------------------------------------------------------------------------------------------------------------------------------------------------------------------------------------------------------------------------------------------------------------------------------------------------------------------------------------------------------------------------------------------------------------------------------------------------------------------------------------------------------------------------------------------------------------------------------------------------------------------------------------------------------------------------------------------------------------------------------------------------------------------------------------------------------------------------------------------------------------------------------------------------------------------------------------------------------------------------------------------------------------------------------------------------------------------------------------------------------------------------|---------------------------------------------------------------------------------------------------------------------------------------------------------------------------------------------------------------------------------------------------------------------------------------------------------------------------------------------------------------------------------------------------------------------------------------------------------------------------------------------------------------------------------------------------------------------------------------------------------------------------------------------------------------------------------------------------------------------------------------------------------------------------------------------------------------------------------------------------------------------------------------------------------------------------------------------------------------------------------------------------------------------------------------------------------------------------------------------------------------------------------------|------------------------------------------------------------------------------------------------------------------------------------------------------------------------------------------------------------------|-----------------------------------------------------------------------------------------------------------------------------------------------------------------------------------------------------------------------------------------------------------------------------------------------------------------------------------------------------------------------------------------------------------------------------------------------------------------------------------------------------------------------------------------------------------------------------------------------------------------------------------------------------------------------------------------------------------------------------------------------------------------------------------------------------------------------------------------------------------------------------------------------------------------------------------------------------------------------------------------------------------------------------------|-----------------------------------------------------------------------------------------------------------------------------------------------------------------------------------------------------------------------------------------------------------------------------------------------------------------------------------------------------------------------------------------------------------------------------------------------------------------------------------------------------------------------------------------------------------------------------------------------------------------------------------|
| Mendoza<br>2009<br>Garcia-<br>Soletto<br>2013<br><br>Spain<br><br>Heart Failure | <b>RCT</b><br><br><b>Intervention:</b><br>Hospital at home (HAH)<br>care (n=37)<br><b>Control:</b><br>Inpatient hospital care<br>(IHC) in a cardiology unit<br>(n=34) | <b>Inclusion criteria:</b><br>Patient of 65 years and over<br>With diagnosis and prognosis<br>evaluation of HF since at least 12<br>months prior to the study<br>NYHA functional class II or III<br>before coming to ED due to<br>exacerbation<br><b>Exclusion criteria</b><br>Admitted in the preceding 2<br>months for deterioration of HF or<br>acute coronary syndrome<br>Presence of severe symptoms such<br>as sudden worsening of HF<br>Poor prognosis factors<br>(haemodynamic instability, severe<br>arrhythmia, baseline creatinine<br>above 2.5 mg/dL)<br>No response to treatment in the<br>ED<br>Active cancer, severe dementia, or<br>any other disease at an advanced<br>stage indicating life expectancy of<br>less than 6 months<br>Acute psychiatric diseases, active<br>alcoholism<br>Active pulmonary tuberculosis<br>Those living in a psycho-geriatric<br>institution<br>No guarantee of all-day<br>supervision<br>Absence of a telephone at home or<br>living more than 10 km from the<br>hospital<br><b>Baseline characteristics of<br/>participants IHC vs. HaH</b><br>Women, n (%) 10 (29.4) 19 (51.4)<br>0.06 Age, mean +SD 79.9+6.3<br>78.1+6.2 0.20 Admissions for HF in<br>previous year 0.41+0.86 0.65+0.86<br>0.13 O2 saturation in ED 91.4+5.2<br>93.2+4.6 0.12 Functional Class<br>NYHA II, n (%) 23 (67.6) 19 (51.4)<br>Functional Class NYHA<br>III, n (%) 11 (32.4) 18 (48.6) 0.16<br>Atrial fibrillation, n (%) 16 (47) 21<br>(56.8) 0.49 LVEF ≥45%, n (%) 24<br>(70) 23 (62.1) LVEF, <45%, n (%)<br>10 (29.4) 14 (37.8) 0.13 NT-proBNP<br>(pg/mL) 4056+5352 3864+3720<br>0.86 Charlson index 2.1+1.3<br>2.5+1.5 0.35 | <b>Outline of intervention</b><br><br>Characteristics of the HaH<br>unit explained whilst still in<br>ED. Given information sheet<br>with contact phone<br>numbers. Within 12–24 h of<br>the ED visit, patients<br>received scheduled & if<br>necessary, urgent visits to<br>their homes from an<br>internal medicine specialist<br>& a nurse, (staff of the HaH<br>unit). If deterioration<br>occurred outside the<br>working hours (8am-9 pm<br>every day of yr), patients &<br>family were instructed to<br>call 112 to explain they<br>were HaH patients.<br>Samples were taken for lab<br>tests and ECGs were<br>performed in patient's<br>home<br><br>X-ray & echocardiography at<br>hospital was as<br>accessible for HaH patients<br>as for in-patients. Generally<br>all patients were visited<br>daily by a specialist nurse.<br>Patients were visited by a<br>physician daily or every<br>other day depending on<br>condition. Treatment in HaH<br>finished with referral to<br>primary care after<br>recovery or, in case of<br>deterioration or no<br>response to treatment, with<br>transfer to the cardiology<br>ward. | <b>Outline of control</b><br><br>Patients were admitted to<br>hospital, cardiology<br>ward & were managed<br>by the usual staff of<br>cardiology specialists<br>and nurses, in<br>accordance with<br>guidelines. | <b>Relevant measures &amp;<br/>outcomes</b><br><br>No distinction between<br>primary and secondary<br>outcomes<br><br><b>Effectiveness</b><br>Necessity to transfer the<br>patient from HaH to IHC<br>during the first admission<br>Mortality due to any cause,<br>re-admission due to HF, or<br>another cardiovascular<br>event (stroke, acute<br>coronary syndrome, and<br>coronary revascularization)<br>during 1 year of follow-up.<br>Functional status -Barthel<br>index<br>Health-related quality of life<br>-SF-36 since first admission<br>up to 12 months later<br><br><b>Costs</b><br>Cost of the stay<br>Medication, diagnostic tests<br>(electrocardiography,<br>echocardiography,<br>laboratory tests, and chest<br>X-ray), consumables, and<br>transport.<br>visits to HF clinic, primary<br>care physician or ED, as well<br>as re-admissions.<br>For re-hospitalizations, the<br>cost of the admission was<br>estimated as the average<br>cost per day incurred during<br>the first admission for each<br>group. | Clinical outcomes were similar<br>after initial admission and also<br>after the 12 months of follow-<br>up.<br><br>Death or re-admission due to<br>HF or a cardiovascular event<br>occurred in 19 patients in IHC<br>and 20 in HaH (P=0.88).<br><br>Changes in functional status<br>and health-related quality of<br>life over the follow-up period<br>were not significantly<br>different.<br><br>Average cost<br>of initial admission<br>4502±2153E in IHC and<br>2541±1334E in HaH (P< 0.001).<br><br>During 12 months of<br>follow-up, the average<br>expenditure was 4619+7679E<br>and 3425+4948E (P= 0.83)<br>respectively. |

| Author<br>Year<br>Country                     | Study                                                                                                                                                                                                                 | Participants                                                                                                                                                                                                                                                                                                                                                                                                                                                                                                                                                                                                                                                                                                                                                                                                                                                                                                                                                                                                                                                                                                                                                                                                                                                                                                                                                                                                                        | Intervention                                                                                                                                                                                                                                                                                                                                                                                                                                                                                                                                                                                                                                                                                                                                                                                                                                                                                                                                                                                                                                                                                                                                                                                                                              | Control                                                                                                                                                                                                                             | Outcomes assessed                                                                                                                                                                                                                                                                                                          | Results                                                                                                                                                                                                                                                                                                                                                                                                                                                                                                                                                                                                                                                                                                    |
|-----------------------------------------------|-----------------------------------------------------------------------------------------------------------------------------------------------------------------------------------------------------------------------|-------------------------------------------------------------------------------------------------------------------------------------------------------------------------------------------------------------------------------------------------------------------------------------------------------------------------------------------------------------------------------------------------------------------------------------------------------------------------------------------------------------------------------------------------------------------------------------------------------------------------------------------------------------------------------------------------------------------------------------------------------------------------------------------------------------------------------------------------------------------------------------------------------------------------------------------------------------------------------------------------------------------------------------------------------------------------------------------------------------------------------------------------------------------------------------------------------------------------------------------------------------------------------------------------------------------------------------------------------------------------------------------------------------------------------------|-------------------------------------------------------------------------------------------------------------------------------------------------------------------------------------------------------------------------------------------------------------------------------------------------------------------------------------------------------------------------------------------------------------------------------------------------------------------------------------------------------------------------------------------------------------------------------------------------------------------------------------------------------------------------------------------------------------------------------------------------------------------------------------------------------------------------------------------------------------------------------------------------------------------------------------------------------------------------------------------------------------------------------------------------------------------------------------------------------------------------------------------------------------------------------------------------------------------------------------------|-------------------------------------------------------------------------------------------------------------------------------------------------------------------------------------------------------------------------------------|----------------------------------------------------------------------------------------------------------------------------------------------------------------------------------------------------------------------------------------------------------------------------------------------------------------------------|------------------------------------------------------------------------------------------------------------------------------------------------------------------------------------------------------------------------------------------------------------------------------------------------------------------------------------------------------------------------------------------------------------------------------------------------------------------------------------------------------------------------------------------------------------------------------------------------------------------------------------------------------------------------------------------------------------|
| Tibaldi<br>2009<br>Italy<br><br>Heart Failure | single blind RCT<br><br><b>Intervention:</b><br>Physician led - Geriatric Home Hospitalization Service (GHHS; n=48)<br><br><b>Control:</b><br>Patients were randomly assigned to the general medical ward (GMW; n=53) | <b>Inclusion criteria:</b><br>≥75 years with a pre-existing diagnosis of CHF (stage C AHA) & persistent functional impairment indicative of NYHA class III or IV status presenting at hospital ED for acute decompensation (defined )& in need of hospital care. Additional inclusion criteria were appropriate care supervision at home, telephone connection, living in the hospital at-home catchment area, informed consent, at least 1 previous admission for acute CHF, and need for intravenous drug infusion.<br><b>Exclusion criteria</b><br>New-onset heart failure; absence of family and social support; need for mechanical ventilation, hemodialysis, or intensive monitoring; severe dementia ; terminal malignant neoplasm; severe renal impairment; hepatic failure; serum hemoglobin level less than 9 g/dL; and planned cardiac surgery(eg, valve replacement).<br><b>Baseline characteristics of participants</b><br>Long list of demographic & clinical baseline – truncated<br>GHHS vs. GMW<br>Mean age 82.2 (5.2) vs. 80.1(4.9) p=0.04<br>Male (%) 22(46) vs. 30 (57)<br>Married (%) 22 (46) vs. 24 (45)<br>Family support at home (%) 48(100) vs. 53(100)<br>Length of disease (yr) 5.4 (4.7) vs. 5.2 (4.7) plus clinical symptoms both cardiovascular & general including functional status (Barthel index) depression (GDS) MMSE, MNA, comorbidity measured by CIRS 3.6 (1) vs. 3.4 (2) All ns except age | <b>Outline of intervention</b><br>The team has 7 cars, is multidisciplinary and consists: 4 geriatricians, 13 nurses, 3 physio-therapists, 1 social worker &1 counselor working together as a team, with daily meetings<br>7 days a week. In ED all necessary diagnostic tests are provided and then the patient moves home by ambulance, usually within a few hours. Medical consultation with other hospital specialists is possible in the hospital or at the home of the patient. Treatments included physician and nurse visits, standard blood tests, pulse oximetry, spirometry, electrocardiography, echocardiography etc (as per hospital) Patients treated at home and family members obtained adequate Education e.g. early recognition of symptoms. Protocols for prevention of nosocomial infections, bed sores, and immobilization are routinely adopted for frail elderly inpatients. In the first days after admission to GHHS patient was visited at home on a daily basis by physicians and nurses. In the following days this care is tapered off as appropriate Consultation with cardiologists or other hospital specialists was possible. Physicians and nurses were available at all times for urgent home visits. | <b>Outline of control</b><br>The inpatient control group (GMW) received routine hospital care. Protocols for prevention of nosocomial infections, bed sores, and immobilization are routinely adopted for frail elderly inpatients. | <b>Relevant measures &amp; outcomes</b><br><br><b>Primary outcome</b><br>Mortality at 6 months.<br><b>Secondary outcomes</b><br>morbidity (infections, delirium, bed sores, deep vein thrombosis, and falls) during hospitalization, admissions to a nursing home, and subsequent hospital admissions related to any cause | <b>Primary outcomes</b><br>Patient mortality at 6 months was 15% in the total sample, without significant differences between the 2 settings of care. ( 7 vs. 8 deaths )<br><b>Secondary outcomes</b><br>The number of subsequent hospital admissions was not statistically different in the 2 groups<br>8 (17%) vs. 18 (34%)<br><br>mean (SD) time to first additional admission was longer for the GHHS patients (84.3 [22.2] days vs 69.8[36.2] days, P= .02).<br><br>Only the GHHS patients experienced improvements in Depression (GDS) +1.48 (1.860 vs. +0.12 (3.36) p=0.02) nutritional status (MNA) - 0.86(1.12) vs. -0.27 (1.78) p=0.05 Quality-of-life(NHP) +1.09 (2.57 vs. +0.18 (1.94) p=0.046 |

| Author<br>Year<br>Country        | Study                                                                                                                                                          | Participants                                                                                                                                                                                                                                                                                                                                                                                                                                                                                                                                                                                                                                                                                                                                                                                                                                                                                                                                                                                                                                                                                                                                                                                                                                                                                                                                                                                                                                                                                                                                                                                                                                                                                                       | Intervention                                                                                                                                                                                                                                                                                                                                                                                                                                                                                                                                                                                                                                                                                                                                                                                                                                                                                                                                                                                                                                                                                                                              | Control                                                                                                                      | Outcomes assessed                                                                                                                                                                                                                                                                                                                                                                                                                                                                                                                                                                                                                           | Results                                                                                                                                                                                                                                                                                                                                                                                                                                                                                                                                                                                                                                                                       |
|----------------------------------|----------------------------------------------------------------------------------------------------------------------------------------------------------------|--------------------------------------------------------------------------------------------------------------------------------------------------------------------------------------------------------------------------------------------------------------------------------------------------------------------------------------------------------------------------------------------------------------------------------------------------------------------------------------------------------------------------------------------------------------------------------------------------------------------------------------------------------------------------------------------------------------------------------------------------------------------------------------------------------------------------------------------------------------------------------------------------------------------------------------------------------------------------------------------------------------------------------------------------------------------------------------------------------------------------------------------------------------------------------------------------------------------------------------------------------------------------------------------------------------------------------------------------------------------------------------------------------------------------------------------------------------------------------------------------------------------------------------------------------------------------------------------------------------------------------------------------------------------------------------------------------------------|-------------------------------------------------------------------------------------------------------------------------------------------------------------------------------------------------------------------------------------------------------------------------------------------------------------------------------------------------------------------------------------------------------------------------------------------------------------------------------------------------------------------------------------------------------------------------------------------------------------------------------------------------------------------------------------------------------------------------------------------------------------------------------------------------------------------------------------------------------------------------------------------------------------------------------------------------------------------------------------------------------------------------------------------------------------------------------------------------------------------------------------------|------------------------------------------------------------------------------------------------------------------------------|---------------------------------------------------------------------------------------------------------------------------------------------------------------------------------------------------------------------------------------------------------------------------------------------------------------------------------------------------------------------------------------------------------------------------------------------------------------------------------------------------------------------------------------------------------------------------------------------------------------------------------------------|-------------------------------------------------------------------------------------------------------------------------------------------------------------------------------------------------------------------------------------------------------------------------------------------------------------------------------------------------------------------------------------------------------------------------------------------------------------------------------------------------------------------------------------------------------------------------------------------------------------------------------------------------------------------------------|
| Ricauda<br>2008<br>Italy<br>COPD | Single blind RCT<br><br><b>Intervention:</b><br>Geriatric home hospitalization service (GHHS, n=52)<br><br><b>Control:</b><br>General medical ward (GMW, n=52) | <b>Inclusion criteria:</b><br>Patients ≥75 yrs with a diagnosis of acute exacerbation of COPD, defined on Anthonisen criteria as an increase in breathlessness, sputum volume, or purulence for at least 24 hours, admitted to the ED & requiring hospitalization. Additional inclusion criteria were appropriate care supervision in the home, telephone connection, living in the HaH & informed consent.<br><b>Exclusion criteria</b><br>Absence of family and social support; severe hypoxemia (partial pressure of oxygen <50 mmHg); severe acidosis or alkalosis (pH <7.35 or >7.55); suspected pulmonary embolism; suspected myocardial infarction; severe comorbid illness as defined by presence of need for hemodialysis, severe renal impairment (glomerular filtration rate <20 mL/min), cancer (except skin cancer), hepatic failure, or severe dementia (Mini-Mental State Examination score <14).<br><b>Baseline characteristics of participants</b><br>Intervention vs. control<br>Age, mean ±SD 80.1 ±3.2 79.2 ± 3.1 p=0.20 Male, n (%) 29 (56) 39 (75) p=0.06 Married, n (%) 27 (52) 29 (56) .84 Family support n (%) 52 (100) 52 (100) p=0.89 Current smoker, n (%) 7(13) 6(11) p=0.97 Ex-smoker, n (%) 34 (65) 35 (67) p=0.95 FEV1, mean ±SD 0.92 ±0.4 1.04 ± 0.5 p=0.18 % of predicted FEV1 38, 47 Home oxygen use, n(%) 18 (35) 12 (23) p=0.45 Arterial blood gas, mean ±SD pH 7.40 ± 0.04 7.41 ± 0.03 .19 PP of O <sub>2</sub> 69 ± 19 65 ±14 .p= 0.23 PP of CO <sub>2</sub> 44 ± 12 46 ± 12 .47 ADL score, mean ± SD± 2.3 ± 2.2 1.9 ± 2.2 p=0.36 IADL score, mean ± SD 7.1 ± 4.9 8.1 ± 4.2 .27 GDS score, mean ± SD 16.1 ± 6.1 17.2 ± 6.8 .45 Comorbidity index 2.6 ± 1.5 3.0 ± 1.8 p=0.24 | <b>Outline of intervention</b><br><b>Intervention delivered by:</b><br>“a physician-led substitutive hospital-at-home model of care”<br><br>Patients assigned to HaH were immediately transferred home by ambulance. At home, a multi-dimensional geriatric assessment was conducted & patients received hospital-level treatment & services, as their condition dictated. (Physician and nursing visits, standard blood tests, pulse oximetry, electrocardiogram, spirometry, echocardiogram, echographs and Doppler ultrasonographs, oral & intravenous medication administration, including antimicrobials & cytotoxic drugs, oxygen therapy, blood products transfusion, central venous access, surgical treatment of pressure sores, physical therapy & occupational therapy<br>The HaH program emphasized patient & caregiver education about the knowledge of the disease, giving advice about smoking cessation, nutrition, management of activities of daily living & energy conservation, understanding & use of drugs, health maintenance, & early recognition of triggers of exacerbation that required medical intervention. | <b>Outline of control</b><br><b>Intervention delivered by:</b><br>The inpatient control group received routine hospital care | <b>Relevant measures &amp; outcomes</b><br><br><b>Primary outcomes</b><br>Hospital readmission & mortality rates at 6 months.<br><br><b>Secondary outcomes</b><br>Depression status -Geriatric Depression Scale, functional status- Katz activities of daily living & Lawton instrumental activities of daily living<br>Cognitive status -Mini-Mental State Examination, Quality of life -the Nottingham Health Profile<br>Nutritional status -Mini Nutritional Assessment, Caregiver characteristics - Relatives' Stress Scale, & satisfaction using ad hoc questionnaire for Scale.<br>Costs of care were compared for the acute episode. | <b>Primary outcomes</b><br>GHHS vs. GMW<br>Hospital readmissions at 6mths 42% vs 87%, P= 0.001<br>Cumulative mortality at 6 mths was 20.2% in the total sample, No significant differences between grps.<br><br><b>Secondary outcomes</b><br>Mean length of stay 15.5 ±9.5 vs 11.0 ± 7.9 days, P= 0.010<br>Only GHHS patients experienced improvements in depression and QoL scores but ns between grps<br>There were no differences in functional, cognitive, nutritional, or caregiver burden outcomes.<br>Satisfaction at discharge was very good or excellent for 94% vs. 88% (P=0.83) (On a cost per patient per day basis, (\$101.4 ± 61.3 vs \$151.7 ± 96.4, P=0.002). |

| Author<br>Year<br>Country                                                  | Study                                                                                                                                                  | Participants                                                                                                                                                                                                                                                                                                                                                                                                                                                                                                                                                                                                                                                                                                                                                                                                                                                                                                                                                                                                                                                                                                                                                                                                                                                                                                                                                                           | Intervention                                           | Control                                           | Outcomes assessed                                                                                                                                                                                                                                                     | Results                                                                                                                                                                                                                                                                                                                                                                                                                                                                                                                                                                                                                                                                                                                                                                                                                                                         |
|----------------------------------------------------------------------------|--------------------------------------------------------------------------------------------------------------------------------------------------------|----------------------------------------------------------------------------------------------------------------------------------------------------------------------------------------------------------------------------------------------------------------------------------------------------------------------------------------------------------------------------------------------------------------------------------------------------------------------------------------------------------------------------------------------------------------------------------------------------------------------------------------------------------------------------------------------------------------------------------------------------------------------------------------------------------------------------------------------------------------------------------------------------------------------------------------------------------------------------------------------------------------------------------------------------------------------------------------------------------------------------------------------------------------------------------------------------------------------------------------------------------------------------------------------------------------------------------------------------------------------------------------|--------------------------------------------------------|---------------------------------------------------|-----------------------------------------------------------------------------------------------------------------------------------------------------------------------------------------------------------------------------------------------------------------------|-----------------------------------------------------------------------------------------------------------------------------------------------------------------------------------------------------------------------------------------------------------------------------------------------------------------------------------------------------------------------------------------------------------------------------------------------------------------------------------------------------------------------------------------------------------------------------------------------------------------------------------------------------------------------------------------------------------------------------------------------------------------------------------------------------------------------------------------------------------------|
| Rodriguez-Cerillo<br>2009<br>Spain<br>non-massive<br>Pulmonary<br>embolism | <b>COS</b><br><br><b>Intervention:</b><br>Home hospitalization (HH)<br>(n=30)<br><br><b>Control:</b><br>Conventional<br>Hospitalization (CH)<br>(n=31) | <b>Inclusion criteria:</b><br><i>For trial</i><br>Non-massive pulmonary embolism <ul style="list-style-type: none"> <li>No contraindications for treatment with low MW heparin</li> <li>Absence of moderate to severe renal failure</li> <li>Haemodynamic stability</li> <li>O2 saturation higher than 92% breathing room air</li> <li>No signs of heart failure</li> <li>No arrhythmia</li> <li>No haemoptysis</li> </ul> <i>For HH</i> <ul style="list-style-type: none"> <li>Agreement to admission to our HH unit</li> <li>A valid caregiver at home</li> <li>Residence in our health area</li> <li>A condition amenable to home management</li> </ul> <b>Exclusion criteria</b><br>massive PE, haemodynamic instability, oxygen saturation lower than 92% on room air, heart failure, haemoptysis, arrhythmia & contraindication for treatment with low MW heparin<br><b>Baseline characteristics of participants</b><br>Age 66.8 (27–91) 66.7 (31–90) n.s<br>Sex (males) 30% 54.8% n.s<br>Diagnosed neoplasm 13.3% 9.7% n.s<br>Associated DVT 40% 29% n.s<br>Prior TED 0% 19.3% 0.05<br>Dementia 23.3% 6.4% n.s.<br>Hypertension 30% 45.1% n.s.<br>Ischaemic heart disease 6.6% 9.6% n.s.<br>Thrombophilia 3.3% 0% n.s<br>Recent surgery 3.3% 6.4% n.s<br>Unilateral involvement 70% 61.3% n.s<br>Bilateral involvement 30% 38.7% n.s<br>Diagnosed by helical CT 26.6% 38.7% n.s | <b>Outline of intervention</b><br><br><b>No detail</b> | <b>Outline of control</b><br><br><b>No detail</b> | <b>Relevant measures &amp; outcomes</b><br><br>No distinction between Primary and secondary outcomes<br><br>Major and minor bleeding<br>Re-thrombosis, Clinical course<br>Unexpected returns to hospital<br>Need for hospital re-admission in the following 3 months. | All comparisons ns<br><br>Mean stay length HH vs. CH 8.9 days (7–14 days), vs. 10.6 days (6–20 days).<br><br>All patients in study had a favourable clinical course.<br><br>No major bleeding, re-thrombosis, or death occurred.<br><br>One patient on HH experienced an abdominal wall haematoma in the area of administration of the low MW heparin.<br><br>One patient admitted to hospital experienced a haematoma in the right arm related to blood sampling for laboratory tests.<br><br>No patient with HH had infectious complications.<br>Three patients admitted to hospital were diagnosed of urinary tract infection.<br><br>No HH patients required unexpected return to hospital during admission.<br><br>During follow-up, two patients required hospital admission, one in each group. The cause was not related to the thromboembolic disease. |

| Author<br>Year<br>Country               | Study                                                                                                                                                                                                                                 | Participants                                                                                                                                                                                                                                                                                                                                                                                                                                                                                                                                                                                                                                                                                                                                                                                                                                                                                                                                                                                                                                                                                                                                                                                                                                                                                                                                                                                                                                                                      | Intervention                                                                                                                                                                                                                                                                                                                                                                                                                                                                                                                                                                                                                                                                                                                                                                                                   | Control                                                                                                                                                                                                                                                                                                                                                                                                                                                                                                                                                                                                                                                                                                                                                                                                                                                                                                                                                                    | Outcomes assessed                                                                                                                                                                                                                                                                                                                                                                                                                                                                                                                                                                                                                               | Results                                                                                                                                                                                                                                                                                                                                                                                                                                                                                                                                                                 |
|-----------------------------------------|---------------------------------------------------------------------------------------------------------------------------------------------------------------------------------------------------------------------------------------|-----------------------------------------------------------------------------------------------------------------------------------------------------------------------------------------------------------------------------------------------------------------------------------------------------------------------------------------------------------------------------------------------------------------------------------------------------------------------------------------------------------------------------------------------------------------------------------------------------------------------------------------------------------------------------------------------------------------------------------------------------------------------------------------------------------------------------------------------------------------------------------------------------------------------------------------------------------------------------------------------------------------------------------------------------------------------------------------------------------------------------------------------------------------------------------------------------------------------------------------------------------------------------------------------------------------------------------------------------------------------------------------------------------------------------------------------------------------------------------|----------------------------------------------------------------------------------------------------------------------------------------------------------------------------------------------------------------------------------------------------------------------------------------------------------------------------------------------------------------------------------------------------------------------------------------------------------------------------------------------------------------------------------------------------------------------------------------------------------------------------------------------------------------------------------------------------------------------------------------------------------------------------------------------------------------|----------------------------------------------------------------------------------------------------------------------------------------------------------------------------------------------------------------------------------------------------------------------------------------------------------------------------------------------------------------------------------------------------------------------------------------------------------------------------------------------------------------------------------------------------------------------------------------------------------------------------------------------------------------------------------------------------------------------------------------------------------------------------------------------------------------------------------------------------------------------------------------------------------------------------------------------------------------------------|-------------------------------------------------------------------------------------------------------------------------------------------------------------------------------------------------------------------------------------------------------------------------------------------------------------------------------------------------------------------------------------------------------------------------------------------------------------------------------------------------------------------------------------------------------------------------------------------------------------------------------------------------|-------------------------------------------------------------------------------------------------------------------------------------------------------------------------------------------------------------------------------------------------------------------------------------------------------------------------------------------------------------------------------------------------------------------------------------------------------------------------------------------------------------------------------------------------------------------------|
| Carratala<br>2005<br>Spain<br>Pneumonia | <b>Open RCT</b><br><br><b>Intervention:</b><br>Outpatient care with oral levofloxacin therapy or hospitalization with sequential intravenous and oral levofloxacin therapy. (n=110)<br><br><b>Control:</b><br>Hospitalisation (n=114) | <b>Inclusion criteria:</b><br>All immunocompetent patients who were at least 18 years of age and had received a diagnosis of community acquired pneumonia in the emergency department (24 hrs per day, 7 days per week)<br><br>Community acquired pneumonia was defined as the presence of a new infiltrate on chest radiography plus at least 1 of the following: fever (temperature $\geq 38.0$ °C) or hypothermia (temperature $< 35.0$ °C), new cough with or without sputum production, pleuritic chest pain, dyspnea, or altered breath sounds on auscultation.<br><b>Exclusion criteria</b><br><br>Neutropenia, HIV infection, transplantation, or splenectomy or who were taking immunosuppressive drugs<br><br><b>Baseline characteristics of participants</b><br>Male 69 (62.7) 66 (57.9)<br>Female 41 (37.3) 48 (42.1)<br>Mean age $\pm$ SD, y 67.5 $\pm$ 11.8 64.9 $\pm$ 13.4<br>Alcohol consumption $\pm 80$ g/d, n (%) 13 (12.4) 7 (6.4)<br>Current tobacco smoking, n (%) $\ddagger$ 21 (19.8) 24 (21.8)<br>Influenza vaccine in current season, n (%) $\S$ 44 (42.7) 49 (46.2)<br>Pneumococcal vaccine in the previous 5 yrs, n (%) $\pm$ 15 (15.6) 13 (13.1)<br>Comorbid conditions, n (%) 71 (64.5) 78 (68.4)<br>Mean oxygen saturation $\pm$ SD, % 94.5 $\pm$ 2.0 94.5 $\pm$ 1.8<br>Multilobar pneumonia, n (%) 8 (7.3) 9 (7.9)<br>Risk class, n (%) II 55 (50.0) 63 (55.3) III 55 (50.0) 51 (44.7)<br>Mean PSI score $\pm$ SD 70.0 $\pm$ 11.6 66.9 $\pm$ 12.5 | <b>Outline of intervention</b><br>Outpatients were given oral levofloxacin (500 mg/d), and received detailed written information about their pneumonia diagnosis and their treatment plan, as well as emergency contact telephone numbers for a nurse or investigator physician. Patients were visited at home by a nurse 48 hours after emergency department discharge. The visit included assessment of vital signs and measurement of oxygen saturation by pulse oximetry. If the nurse thought that a patient's condition was not improving (worsening of baseline vital signs, oxygen saturation, or both), one of the investigators made an additional visit. The nurse was involved only in outcome assessment. Patients were seen at the outpatient clinic at days 7 and 30 after pneumonia diagnosis. | <b>Outline of control</b><br>Hospitalized patients received sequential intravenous and oral levofloxacin (500 m and received detailed written information about their pneumonia diagnosis and their treatment plan, as well as emergency contact telephone numbers for a nurse or investigator physician g/d) Patients assigned to hospitalization were seen daily during their hospital stay by attending physicians and by at least 1 of the investigators. Criteria for early switching from intravenous to oral levofloxacin were a respiratory rate of 24 breaths/min or less, a pulse rate of 100 beats/min or less, a temp of 37.8 °C or lower on 2 occasions at least 8 hours apart, and maintenance of adequate oral intake. Physicians were advised to discharge patients after their clinical condition stabilized, in accordance with previously recommended criteria. Patients were seen at the outpatient clinic at days 7 and 30 after pneumonia diagnosis. | <b>Relevant measures &amp; outcomes</b><br><br><b>Primary outcomes</b><br>% of patients with an overall successful outcome at the end of treatment, according to 7 predefined criteria: cure of pneumonia (as defined later), absence of adverse drug reactions, absence of medical complications during treatment, no need for additional visits, no changes in initial treatment with levofloxacin, <b>absence of subsequent hospital admission in the 30 days after randomization</b> , and absence of death from any cause in the 30 days after randomization.<br><br><b>Secondary outcomes</b><br>Patients' quality of life & satisfaction | Intervention vs. control<br><br><b>Primary outcome</b><br>Successful outcome was achieved in 83.6 vs. 80.7% (absolute difference, 2.9 % points [95% CI, $\pm 7.1$ to 12.9 % points]).<br>% patients with adverse drug reactions (9.1% vs. 9.6%),<br>Subsequent hospital admissions (6.3% vs. 7.0%),<br>Overall mortality (0.9% vs. 0%)<br>Medical complications (0.9% vs. 2.6%),<br><br><b>Secondary outcomes</b><br>All ns<br>Quality of life (9.1% vs. 9.6%)<br>Satisfied with overall care (91.2% vs. 79.1%; absolute difference, 12.1% [CI, 1.8 to 22.5 % points]). |



| Author<br>Year<br>Country     | Study                                                                                                                                                                                                                                                                                                                                                                                                                                                                                                                                                                                                                                                                                                                                                                                                                                              | Participants                                                                                                                                                                                                                                                                                                                                                                                                                                                                                                                                                                                                                                                                                                                                                                                                                                                                                                                                                                                                                                                                         | Intervention                                                                                                                                                                                                                                                                                                                                                                                                                                                                                                                                                                                                                                                                                                                                                                                                                                                                                                                                                                                                                                                                                                                                                                                                                                                                                                                                                                                                                                                                                                                                                                       | Control                                                                                                                                                                                                                                                                                                                                                                                                                                                                                                                                                                                                                                                                                                                                          | Outcomes assessed                                                                                                                                                                                                                                                                                                                                      | Results                                                                                                                                                                                                                                                                                                                                                                                                                                                                                                                                                                                                                                                                                                                                                                                                                                                                                                                                                                                                                                                                                                                                                          |
|-------------------------------|----------------------------------------------------------------------------------------------------------------------------------------------------------------------------------------------------------------------------------------------------------------------------------------------------------------------------------------------------------------------------------------------------------------------------------------------------------------------------------------------------------------------------------------------------------------------------------------------------------------------------------------------------------------------------------------------------------------------------------------------------------------------------------------------------------------------------------------------------|--------------------------------------------------------------------------------------------------------------------------------------------------------------------------------------------------------------------------------------------------------------------------------------------------------------------------------------------------------------------------------------------------------------------------------------------------------------------------------------------------------------------------------------------------------------------------------------------------------------------------------------------------------------------------------------------------------------------------------------------------------------------------------------------------------------------------------------------------------------------------------------------------------------------------------------------------------------------------------------------------------------------------------------------------------------------------------------|------------------------------------------------------------------------------------------------------------------------------------------------------------------------------------------------------------------------------------------------------------------------------------------------------------------------------------------------------------------------------------------------------------------------------------------------------------------------------------------------------------------------------------------------------------------------------------------------------------------------------------------------------------------------------------------------------------------------------------------------------------------------------------------------------------------------------------------------------------------------------------------------------------------------------------------------------------------------------------------------------------------------------------------------------------------------------------------------------------------------------------------------------------------------------------------------------------------------------------------------------------------------------------------------------------------------------------------------------------------------------------------------------------------------------------------------------------------------------------------------------------------------------------------------------------------------------------|--------------------------------------------------------------------------------------------------------------------------------------------------------------------------------------------------------------------------------------------------------------------------------------------------------------------------------------------------------------------------------------------------------------------------------------------------------------------------------------------------------------------------------------------------------------------------------------------------------------------------------------------------------------------------------------------------------------------------------------------------|--------------------------------------------------------------------------------------------------------------------------------------------------------------------------------------------------------------------------------------------------------------------------------------------------------------------------------------------------------|------------------------------------------------------------------------------------------------------------------------------------------------------------------------------------------------------------------------------------------------------------------------------------------------------------------------------------------------------------------------------------------------------------------------------------------------------------------------------------------------------------------------------------------------------------------------------------------------------------------------------------------------------------------------------------------------------------------------------------------------------------------------------------------------------------------------------------------------------------------------------------------------------------------------------------------------------------------------------------------------------------------------------------------------------------------------------------------------------------------------------------------------------------------|
| Kalra<br>2005<br>UK<br>Stroke | <p><b>RCT</b></p> <p><b>Intervention:</b><br/><b>1)ST (n=152)</b><br/>The stroke team involved management on general wards with specialist team support. The team undertook stroke assessments and advised ward-based nursing and therapy staff on acute care, secondary prevention and rehabilitation aspects.</p> <p><b>2) DC (n=153)</b><br/><b>Domiciliary care provided management at home under the supervision of a GP and stroke specialist with support from specialist team and community services.</b><br/><b>Support was provided for a maximum of 3 months.</b></p> <p><b>Control:</b><br/>Usual care <b>SU (n=152)</b><br/>The stroke unit provided 24-hour care provided by a specialist multidisciplinary team based on clear guidelines for acute care, prevention of complications, rehabilitation and secondary prevention.</p> | <p>Patients were included within 72 hours of stroke onset. The research team was notified by telephone or fax by GPs for patients at home, and by accident and emergency (A&amp;E) services for suspected stroke patients presenting to the casualty department.</p> <p><b>Inclusion criteria:</b><br/>Patients with disabling stroke who could be supported at home with nursing, therapy and social services input on initial assessment were included in the study.</p> <p><b>Exclusion criteria</b><br/>Patients with mild stroke, severe strokes, already admitted to hospitals, and those with unusual or atypical neurological features who required specialised assessments or investigation to establish a diagnosis of stroke. Patients who were institutionalised or had severe disability (Rankin 4 or 5) before stroke</p> <p><b>Baseline characteristics of participants SU vs. ST vs.HC</b><br/>Median age (years) (IQR) 75 (72–84) 77.3 (71–83) 77.7 (67–83)<br/>No. of females (%) 69 (46.6) 76 (50.6) 68 (45.6) Living alone (%) 50 (33.7) 55 (36.6) 50 (33.5)</p> | <p><b>Outline of intervention</b><br/><b>ST</b> Patients were managed on general wards &amp; under care of admitting physicians. All patients were seen by specialist team: doctor (specialist registrar grade), a nurse (grade G), a physiotherapist (senior I) and an occupational therapist (senior I) with expertise in stroke management. Patients were assessed by the specialist team, which undertook a diagnostic evaluation and assessment for needs. Ward provided the day-to-day treatment, the team advised on specialist aspects of stroke care. It reviewed progress and treatment of individual patients with ward team &amp; helped in discharge planning and setting up of post discharge services. The team provided counselling, education and support to the family, identified expectations and advised about realistic outcomes in the context of previous morbidity and present deficits.</p> <p><b>DC</b> Patients were managed in own home by a specialist team consisting of a doctor (specialist registrar), a nurse (G grade) &amp; therapists (senior I grades), with support from district nursing and social services for nursing and personal care needs. Patients were under the joint care of the stroke physician and GP. Investigations, including CT scanning, were performed in outpatient s. Therapy was provided by members of the specialist stroke team. Each patient had an individualised integrated care pathway outlining activities and the objectives of treatment, which was reviewed at weekly multi-disciplinary meetings.</p> | <p><b>Outline of control</b><br/><b>SU</b><br/>Care was provided by a stroke physician supported by a multidisciplinary team with specialist experience in stroke management. There were clear guidelines for acute care, prevention of complications, rehabilitation and secondary prevention, and a culture of joint assessments, goal setting, coordinated treatment and discharge planning.</p> <p>A coordinated multidisciplinary approach was adopted towards rehabilitation, with emphasis on early mobilisation. All patients had an individualised rehabilitation plan with clearly defined goals based on joint assessments. Patient participation was encouraged, with focus on motivation and providing an enriched environment.</p> | <p><b>Relevant measures &amp; outcomes</b></p> <p><b>Primary outcomes</b><br/>Death or institutionalisation at 1 year.</p> <p>Dependence - modified Rankin Scale (mRS),</p> <p><b>Secondary outcomes included</b><br/>Orgogozo scale, BI and FAI for disability, the mRS for handicap</p> <p>EuroQoL-quality of life of patients and their carers.</p> | <p>Mortality and institutionalisation at 1yr were lower on SU vs.ST or DC</p> <p>Significantly fewer patients on SU died compared with ST</p> <p>The proportion of patients alive without severe disability at 1 year was also significantly higher on SU vs. ST or DC.</p> <p>These differences were present at 3 &amp; 6 mths after stroke.</p> <p>Stroke survivors on SU showed greater improvement on basic activities of daily living compared the other two grps. Achievement of higher levels of function was not influenced by strategy of care.</p> <p>QoL at 3mths was significantly better in SU &amp; DC patients.</p> <p>There was greater dissatisfaction with care with ST vs. SU or DC.</p> <p>Poor outcomewith DC and ST was associated with Barthel Index &lt;5, incontinence and with ST, age &gt;75 years.</p> <p>The total costs of stroke per patient over 12mths were £11,450 for SU, £9527 for ST &amp; £6840 for DC<br/>The mean costs per day alive for the SU were significantly less than those for the ST , but no different from DC patients.<br/>Costs for DC were significantly less than for those managed by the SU or ST.</p> |



| Author<br>Year<br>Country                                              | Study                                                                                                                                                                                                                               | Participants                                                                                                                                                                                                                                                                                                                                                                                                                                                                                                                                                                                                                                                                                                                                                                                                                                                                                                                                                                                                                                                                  | Intervention                                                                                                                                                                                                                                                                                                                                                                                                                                                                                                                                                                                                            | Control                                                                                                                                                       | Outcomes assessed                                                                             | Results                                                                                                                                                                                                                                                                                                                                                                                                                                                                                    |
|------------------------------------------------------------------------|-------------------------------------------------------------------------------------------------------------------------------------------------------------------------------------------------------------------------------------|-------------------------------------------------------------------------------------------------------------------------------------------------------------------------------------------------------------------------------------------------------------------------------------------------------------------------------------------------------------------------------------------------------------------------------------------------------------------------------------------------------------------------------------------------------------------------------------------------------------------------------------------------------------------------------------------------------------------------------------------------------------------------------------------------------------------------------------------------------------------------------------------------------------------------------------------------------------------------------------------------------------------------------------------------------------------------------|-------------------------------------------------------------------------------------------------------------------------------------------------------------------------------------------------------------------------------------------------------------------------------------------------------------------------------------------------------------------------------------------------------------------------------------------------------------------------------------------------------------------------------------------------------------------------------------------------------------------------|---------------------------------------------------------------------------------------------------------------------------------------------------------------|-----------------------------------------------------------------------------------------------|--------------------------------------------------------------------------------------------------------------------------------------------------------------------------------------------------------------------------------------------------------------------------------------------------------------------------------------------------------------------------------------------------------------------------------------------------------------------------------------------|
| Rodriguez-Cerrillo<br>2013<br>Spain<br>uncomplicated<br>diverticulitis | <b>Prospective controlled study</b><br><br><b>Intervention:</b><br>Patients stayed 24 h in the Observation Ward within ED prior to discharge and treatment at home. (n=34)<br><b>Control:</b><br>Traditional hospitalization (n=18) | <b>Inclusion criteria:</b><br>≥70 years diagnosed with uncomplicated diverticulitis (The existence of abscess, fistula, bowel obstruction and peritonitis)<br>Patients who were willing to be treated at home and had a caregiver 24 h a day were transferred to HaH. The rest of the patients were admitted to conventional hospitalization.<br><br><b>Exclusion criteria</b><br>Patients with complicated diverticulitis, β-lactam allergy or who required admission to hospital for other pathology<br><br><b>Baseline characteristics of participants</b><br>intervention vs. control<br><br>Age 77 (71–90) 79 (71–98)<br>Sex (female) 28 (82.4%) 16 (84.2%)<br>Cardiopathy 9 (26.5%) 6 (31.6%)<br>Diabetes mellitus 4 (11.7%) 2 (10.5%)<br>Chronic renal failure 4 (11.7%) 1 (5.2%)<br>Neoplasm 1 (2.9%) 1 (5.2%)<br>COPD 1 (2.9%) 1 (5.2%)<br>Corticosteroids 4 (11.7%) 2 (10.5%)<br>Previous diverticulitis 7 (20.5%) 3 (15.8%)<br>Abdominal pain 34 (100%) 19 (100%)<br>Fever 9 (26.5%) 6 (31.6%)<br>Diarrhea 6 (17.6%) 3 (15.8%)<br>Leucocytosis 7 (20.5%) 3 (15.8%) | <b>Outline of intervention</b><br><br><b>Intervention delivered by:</b><br>All patients were given Ertapenem after diagnosis. Patients in HaH grp stayed 24 h in the observation ward within ED prior to discharge.<br>At home, nurses administrated Ertapenem every day. The physician conducted 2–3 home visits per week, depending on the patient's clinical course. On admission patients were provided with a phone number to contact the unit if any problem arose. Intravenous antibiotic was changed to oral therapy (amoxicillin–clavulanate) after 4–6 days of treatment until complete 10 days of treatment. | <b>Outline of control</b><br><b>Intervention delivered by:</b><br>All patients were given ertapenem after diagnosis & experienced traditional hospitalisation | <b>Relevant measures &amp; outcomes</b><br><br>No primary nor secondary outcomes were defined | A small amount of free fluid was present in 38% of patients treated with HaH and 42% of patients in hospital. All patients had a good clinical evolution. None of the patients treated with HaH needed be transferred to hospital. Mean stay was 9 days in HaH vs. 10 days in Hospital. The cost of each patient with diverticulitis treated at home was 1368 euros cheaper than the cost of a patient treated in the hospital (fewer staff and important reduction of maintenance costs). |

1  
2  
3  
4  
5  
6  
7  
8  
9  
10  
11  
12  
13  
14  
15  
16  
17  
18  
19  
20  
21  
22  
23  
24  
25  
26  
27  
28  
29  
30  
31  
32  
33  
34  
35  
36  
37  
38  
39  
40  
41  
42  
43  
44  
45  
46  
47  
48  
49

| Author<br>Year<br>Country                                                                        | Study                                                                                                                                                                                                                                                                                                                                                                                                                                                                                                                                                                                                                                                                                                                                                                                                                                                                                                                | Participants                                                                                                                                                                                                                                                                                                                                                                                                                                                                                                                                                                                                                                                                                                                                                                                                                                                                                                                                                                                                                                                                                                                                                                                                                                                                                                          | Intervention                                                                                                                                                                                                                                                                                                                                                                                                                                                                                                                                                                                                                                                                                                                                                                                                                                                                                                                                                                                                                                                                                                                                                                                                                                                                                             | Control                                                                                                                                                                                                                                                                                                                                                                                                                                                                                                                                                                                                                                                                                                                                                                                                                                                                                             | Outcomes assessed                                                                                                         | Results                                                                                                                                                                                                                                                                                                                                                                                                                                                                                                                                                                                                                                                                                                                                                                                                                                                                                                                                                                                                                                                                                                                                                                                              |                                                                                                                                                                                                                                                                                                                                                                                                                                                                                                                                                                                                                                                                                                                                                                                                                                                                                                                |
|--------------------------------------------------------------------------------------------------|----------------------------------------------------------------------------------------------------------------------------------------------------------------------------------------------------------------------------------------------------------------------------------------------------------------------------------------------------------------------------------------------------------------------------------------------------------------------------------------------------------------------------------------------------------------------------------------------------------------------------------------------------------------------------------------------------------------------------------------------------------------------------------------------------------------------------------------------------------------------------------------------------------------------|-----------------------------------------------------------------------------------------------------------------------------------------------------------------------------------------------------------------------------------------------------------------------------------------------------------------------------------------------------------------------------------------------------------------------------------------------------------------------------------------------------------------------------------------------------------------------------------------------------------------------------------------------------------------------------------------------------------------------------------------------------------------------------------------------------------------------------------------------------------------------------------------------------------------------------------------------------------------------------------------------------------------------------------------------------------------------------------------------------------------------------------------------------------------------------------------------------------------------------------------------------------------------------------------------------------------------|----------------------------------------------------------------------------------------------------------------------------------------------------------------------------------------------------------------------------------------------------------------------------------------------------------------------------------------------------------------------------------------------------------------------------------------------------------------------------------------------------------------------------------------------------------------------------------------------------------------------------------------------------------------------------------------------------------------------------------------------------------------------------------------------------------------------------------------------------------------------------------------------------------------------------------------------------------------------------------------------------------------------------------------------------------------------------------------------------------------------------------------------------------------------------------------------------------------------------------------------------------------------------------------------------------|-----------------------------------------------------------------------------------------------------------------------------------------------------------------------------------------------------------------------------------------------------------------------------------------------------------------------------------------------------------------------------------------------------------------------------------------------------------------------------------------------------------------------------------------------------------------------------------------------------------------------------------------------------------------------------------------------------------------------------------------------------------------------------------------------------------------------------------------------------------------------------------------------------|---------------------------------------------------------------------------------------------------------------------------|------------------------------------------------------------------------------------------------------------------------------------------------------------------------------------------------------------------------------------------------------------------------------------------------------------------------------------------------------------------------------------------------------------------------------------------------------------------------------------------------------------------------------------------------------------------------------------------------------------------------------------------------------------------------------------------------------------------------------------------------------------------------------------------------------------------------------------------------------------------------------------------------------------------------------------------------------------------------------------------------------------------------------------------------------------------------------------------------------------------------------------------------------------------------------------------------------|----------------------------------------------------------------------------------------------------------------------------------------------------------------------------------------------------------------------------------------------------------------------------------------------------------------------------------------------------------------------------------------------------------------------------------------------------------------------------------------------------------------------------------------------------------------------------------------------------------------------------------------------------------------------------------------------------------------------------------------------------------------------------------------------------------------------------------------------------------------------------------------------------------------|
| Leff<br>[3066]<br><br>2005<br><br>USA<br><br>Plus<br>Leff 2009<br>[2545]<br>Frick 2009<br>[0158] | <b>Prospective quasi experimental</b><br><br>2 consecutive 11 month phases<br><br><b>Intervention:</b><br>Treatment in a hospital-at-home model of care that substitutes for treatment in an acute care hospital. Offered in the 2 <sup>nd</sup> phase of study<br>n=169<br><br><b>Control:</b><br>Described as 'observation group' in the first phase of study. Eligible patients were identified and followed through usual hospital care.<br>n=286<br><br><b>Aim:</b><br>'to evaluate the safety, efficacy, clinical and functional outcomes, patient and caregiver satisfaction, and costs of providing acute hospital level care in a hospital at home that substituted entirely for admission to an acute care hospital for older persons.'<br><br><b>Setting:</b><br><b>Intervention</b> (if received):<br>At home<br><b>Control</b><br><b>Secondary hospital care</b><br><br><b>Power calculation:</b><br>No | <b>Inclusion criteria:</b><br>Community-dwelling persons ≥65 yrs old, Lived in catchment area<br>In the opinion of a physician not involved in study, required admission to an acute care hospital for these illnesses: community-acquired pneumonia, exacerbation of chronic heart failure or chronic obstructive pulmonary disease, or cellulitis.<br>Required to meet validated criteria of medical eligibility for hospital-at-home care.<br><b>Exclusion criteria</b><br>Most common reasons for medical ineligibility were uncorrectable hypoxemia, suspected myocardial ischemia, and presence of an acute illness, other than the target illness, for which the patient was required to be hospitalized.<br><b>Baseline characteristics of participants at all sites (Stats shown if signif)</b><br>Observation vs. intervention Age (SD) 77.3 (6.6) vs.77.2(7.0)<br>% female 34 vs. 42%<br>% white 90 vs.86%<br><b>% in poverty 11 vs.19%</b><br><b>p=0.027</b><br><b>% live alone 43 vs.33%</b><br><b>p=0.022</b><br>Mean mini mental state (SD)25.5 (4.2) vs. 25.2(4.4)<br>Mean Charlson score (SD) 3.1 (2.0) vs.3.0 (1.8)<br><b>Mean medications (SD) 6.8 (3.9) vs. 8.1(4.5) p=0.002</b><br>%Primary admission diagnosis<br>Pneumonia 31vs. 32%<br>COPD 32 vs.28%<br>Cellulitis 12 vs 18%<br>CHF 25vs.22% | The study was conducted in 3 Medicare managed care (Medicare +Choice) plans at 2 sites and at a Veterans Administration medical centre. Univera Health and Independent Health, in Buffalo, New York, are Medicare + Choice plans These 2 plans collaborated to provide hospital- at-home care and made up 1 study site (site 1).<br><br>The Fallon Health Care System (site 2), in Worcester, Massachusetts, operates a not-for-profit Medicare +Choice plan, and the Fallon Clinic, a for-profit multispecialty physician group, provides care on a capitated basis to Medicare + Choice beneficiaries.<br><br>The Portland, Oregon, Veterans Administration Medical Center (site 3) is a quaternary care and teaching facility.<br><br>A patient requiring admission to the acute care hospital for a target illness was identified in an ED or ambulatory site and his or her eligibility status was determined. Non-study medical personnel, usually ED physicians, made the decision to hospitalize the patient. All patients who were offered but who declined hospital-at-home care were admitted to the acute care hospital.<br>Study coordinators verified the patient's eligibility for HaH using a standard protocol at enrolment. Most patients were identified the morning after admission. | <b>Outline of intervention &amp;who delivered</b> 1 Nov 2001-30 Sep 2002<br>Patients evaluated by HaH physician either in ED or after ambulance transfer to home. HaH nurse met ambulance at patient's home and provided direct one-on-one nursing for an initial period of ≤ 8hrs at site 3 and ≤24 hrs at sites 1 & 2. followed by intermittent nursing visits and HaH physician at least daily. HaH physician was available 24 hours a day for visits. Nursing and other care components, e.g. durable medical equipment, oxygen therapy were provided and some services e.g. home radiology, support provided by independent contractors. Lifeline devices were provided for patients living alone. Diagnostic tests , IV fluids, IV antimicrobial agents, etc. and oxygen/respiratory therapies were provided at home. Patient was followed by same physician until discharged to primary care | <b>Outline of control</b><br>1 Nov 1990-30 Sep 2001) Eligible patients identified & followed through usual hospital care. | <b>Relevant measures &amp; outcomes</b><br><br><b>No distinction between primary and secondary outcomes</b><br>Intervention group comprised all patients eligible for hospital-at-home care, irrespective of where they were treated. [thus some outcomes are NOT useful to us but some measures are HaH specific]<br><br><b>Mean LoS (SD) days [Leff 2005]</b><br><br><b>Mean time in ED (SD) in hrs</b><br>.....<br><br>Sub-analysis of HaH vs. Non-HaH (i.e. different to main report [Leff 2009])<br><b>Changes in ADL and IADL from 1mth before admission -2 weeks after intervention</b><br><br><b>Costs</b><br><b>Within each health system and per condition</b> [Frick 2009]<br><br><b>Overall summary</b><br>'The HaH care model is feasible, safe, and efficacious for certain older patients with selected acute medical illnesses who require acute hospital-level care.' Leff 2005<br>HaH care is associated with modestly better improvements in IADL status and trends toward more improvement in ADL status than traditional acute hospital care. Leff 2009<br>Total costs seem to be lower when substitutive HaH care is available for patients with CHF or COPD disease.Frick2009 | Intervention vs. control<br><br><b>Mean LoS (SD) days</b><br><b>4.9 (9.9) 3.2 (2.5) p =0.004</b><br><br><b>Mean time in ED (SD) in hrs</b><br><b>6.4(1.8,11.6)SD 1.9 vs. 5.5(1.0,21.3) SD3.2</b><br><b>p=0.001</b><br>[Leff 2005]<br>-----<br><b>Changes in ADL and IADL from 1mth before admission -2 weeks after intervention</b><br>ADL 0.39(3.13) vs. -0.6(3.09)<br>p=0.1<br><b>IADL 0.74(2.86) vs. -0.70(2.68)</b><br><b>p=0.007</b><br>[Leff 2009]<br>-----<br><b>Costs</b><br><b>Within each health system and per condition</b> Mean (SD)<br>Overall<br><b>\$5081(4427)vs.\$7480(8113)</b><br><b>p&lt;0.001</b><br>Pneumonia<br>\$5272(6036) vs. \$6761(6451)<br>NS<br>Congestive heart failure<br><b>\$3310(2118) vs. \$6399(6643)</b><br><b>p&lt;0.001</b><br>COPD<br><b>\$4293(3806) vs. \$6500(7305)</b><br><b>p&lt;0.05</b><br>Cellulitis<br>\$4262(2309) vs. \$7287(11471)<br>NS<br>[Frick 2009] |

## Hospital in Nursing/Care Home (HNCH) (n=2)

| Author<br>Year<br>Country   | Study                                                                                                                                                                                | Participants                                                                                                                                                                                                                                                                                                                                                                                                                                                                                                                                                                                                                                                                                                                                                                                                                                                                                                                                                                                                       | Intervention                                                                                                                                                                                                                                                                                                                                                                                                                                                                                                                                                                                                                                                                                                                                                                                                                                                                                                                                                                                                                                                                  | Control                                                                                                                                                                                                                                                                                                                                                                                                                                                                                                                                                                | Outcomes assessed                                                                                                                                                                                                                                                                                                                                                                         | Results                                                                                                                                                                                                                                                                                                                                                                                                                                                                                                                                           |
|-----------------------------|--------------------------------------------------------------------------------------------------------------------------------------------------------------------------------------|--------------------------------------------------------------------------------------------------------------------------------------------------------------------------------------------------------------------------------------------------------------------------------------------------------------------------------------------------------------------------------------------------------------------------------------------------------------------------------------------------------------------------------------------------------------------------------------------------------------------------------------------------------------------------------------------------------------------------------------------------------------------------------------------------------------------------------------------------------------------------------------------------------------------------------------------------------------------------------------------------------------------|-------------------------------------------------------------------------------------------------------------------------------------------------------------------------------------------------------------------------------------------------------------------------------------------------------------------------------------------------------------------------------------------------------------------------------------------------------------------------------------------------------------------------------------------------------------------------------------------------------------------------------------------------------------------------------------------------------------------------------------------------------------------------------------------------------------------------------------------------------------------------------------------------------------------------------------------------------------------------------------------------------------------------------------------------------------------------------|------------------------------------------------------------------------------------------------------------------------------------------------------------------------------------------------------------------------------------------------------------------------------------------------------------------------------------------------------------------------------------------------------------------------------------------------------------------------------------------------------------------------------------------------------------------------|-------------------------------------------------------------------------------------------------------------------------------------------------------------------------------------------------------------------------------------------------------------------------------------------------------------------------------------------------------------------------------------------|---------------------------------------------------------------------------------------------------------------------------------------------------------------------------------------------------------------------------------------------------------------------------------------------------------------------------------------------------------------------------------------------------------------------------------------------------------------------------------------------------------------------------------------------------|
| Crilly<br>2010<br>Australia | 'quasi experimental'<br><br>[Controlled (his) study ]<br><br><b>Intervention:</b><br>Hospital in the nursing home (HINH) n=62<br><br><b>Control:</b><br>Usual in-hospital care n=115 | <b>Inclusion criteria:</b><br>Reside in an ACF.<br>Have a signed GP request for HINH review from the ACF.<br>Be of any age (usually ≥ 65 yrs).<br>Present with an illness that required hospital services but not necessarily admission e.g. UTI & could have treatment e.g. antibiotics continued by ACF staff.<br>Prior to start of HINH, patients who would have fit inclusion criteria for hospital admission<br><b>Exclusion criteria:</b><br>ACF residents who required extensive treatment that could not be managed in ACF or who required specific services that could only be received in hospital e.g. surgery<br><br><b>Baseline characteristics of participants</b><br><b>HINH vs. Control</b><br>Age (SD) 85(7.1) vs.84.6(6.6)years<br>Triage category 3.2 (0.7) vs.3.2(0.7)<br>Female 76vs. 75%<br>Diagnostic category: Respiratory 24 vs.26%<br>Cellulitis 18 vs.17%<br>Kidney/urinary tract 18vs.16%<br>Cardiac 10 vs. 10 %<br>Abdominal/GI 8vs.8%<br>Viral/sepsis 7 vs.6%<br>All other 16 vs.17% | In the ED. Enrolments were made by HINH programme manager (registered nurse) with programme director ( ED director), GPs and ACF nursing staff, as appropriate. After hours and on weekends, if patient was suitable for HINH , they stayed in ED short stay unit and were reviewed by HINH nurse on next weekday.<br><br><b>Outline of intervention</b><br>The HINH nurse checks with the ACF registered nurse and patient on the patients' progress initially on a daily basis and then every couple of days. Discharge occurs when required treatment has ceased. This completes the patients' hospital-affiliated episode.<br><br><b>Intervention delivered by:</b><br>HINH programme delivers acute care nursing support services, medication and equipment to the ACF registered nurse and/or enrolled nurse. These services may include initial training and education regarding antibiotic or IV fluid administration; specific wound treatment and dressing procedure (with dressing materials); suprapubic catheter care, behaviour management and palliative care. | <b>Outline of control</b><br>The comparison group was selected from patients who presented to ED and were subsequently admitted during the same time period. To be included in this group, the patients had to reside in an ACF and be aged ≥65yrs. ACF residents who presented to the ED were in some cases not enrolled in HINH because they had a medical problem that was judged as possibly requiring in-hospital admission services beyond those offered by the HINH.<br><br><b>Intervention delivered by:</b><br>No details but presumably usual hospital staff | <b>Relevant measures &amp; outcomes</b><br><br><b>Hospital LOS (days)</b><br><br><b>ED LOS (hours)</b><br><br><b>Episode of care (total time) LOS (days)</b><br><br><b>Long (≥6days) vs. short hospital LOS</b><br><br><b>Long (≥8 days) ED LOS vs. short</b><br><br><b>Long episode of care (≥6 days)</b><br><br><b>Hospital readmissions within 28 days</b><br><br><b>Costs</b><br>None | HINH vs. Control<br><br>Mean (SD)<br><b>Hospital LOS</b><br><b>2.19 (0.82) vs.6.2(0.59) days</b><br><b>p&lt;0.001</b><br><br><b>ED LOS</b><br><b>9.94(0.66) vs. 7.01(0.47) hrs</b><br><b>p=0.005</b><br><br><b>Episode of Care LOS</b><br>9.56(1.26)vs. 6.20(0.59) days<br><b>p=0.14</b><br><br>Percentages<br><b>Hospital LOS 6+days</b><br><b>9.6 vs. 40 p&lt;0.001</b><br>Episode of care 6+days<br>46.8 vs.40.0 p=0.35<br><b>LOS in ED 8+ hours</b><br><b>50.0vs.33.9 p=0.05</b><br><br><b>Readmission in 28 days</b><br>11.3 vs. 11.3 p=0.99 |

| Author<br>Year<br>Country | Study                                                                                                                                                                                  | Participants                                                                                                                                                                                                                                                                                                                                                                                                                                                                                                                                                                                                                                                                                                                                                                                                                                                                                                                                                      | Intervention                                                                                                                                                                                                                                                                                                                                                                                                                                                                                                                                                                                                                                                                                                                                                                                                                                                                                                                                                                                                                                                                                                                                                                                                                                                                                                                                                                                                                                                                                                                                                                          | Control                                                                                                                                                                                                                                                                                                                                                                                  | Outcomes assessed                                                                                                                                                                                                                                                                                                                                        | Results                                                                                                                                                                                                                                                                                                                                                                                                                                                                                                          |
|---------------------------|----------------------------------------------------------------------------------------------------------------------------------------------------------------------------------------|-------------------------------------------------------------------------------------------------------------------------------------------------------------------------------------------------------------------------------------------------------------------------------------------------------------------------------------------------------------------------------------------------------------------------------------------------------------------------------------------------------------------------------------------------------------------------------------------------------------------------------------------------------------------------------------------------------------------------------------------------------------------------------------------------------------------------------------------------------------------------------------------------------------------------------------------------------------------|---------------------------------------------------------------------------------------------------------------------------------------------------------------------------------------------------------------------------------------------------------------------------------------------------------------------------------------------------------------------------------------------------------------------------------------------------------------------------------------------------------------------------------------------------------------------------------------------------------------------------------------------------------------------------------------------------------------------------------------------------------------------------------------------------------------------------------------------------------------------------------------------------------------------------------------------------------------------------------------------------------------------------------------------------------------------------------------------------------------------------------------------------------------------------------------------------------------------------------------------------------------------------------------------------------------------------------------------------------------------------------------------------------------------------------------------------------------------------------------------------------------------------------------------------------------------------------------|------------------------------------------------------------------------------------------------------------------------------------------------------------------------------------------------------------------------------------------------------------------------------------------------------------------------------------------------------------------------------------------|----------------------------------------------------------------------------------------------------------------------------------------------------------------------------------------------------------------------------------------------------------------------------------------------------------------------------------------------------------|------------------------------------------------------------------------------------------------------------------------------------------------------------------------------------------------------------------------------------------------------------------------------------------------------------------------------------------------------------------------------------------------------------------------------------------------------------------------------------------------------------------|
| Lau<br>2013<br>Australia  | <b>Controlled (his) Case series</b><br><br><b>Intervention</b> Treatment in residential care facilities (TRC) grp n=95<br><br><b>Control</b> Hospital-based aged care unit (ACU) n=167 | <b>Inclusion criteria:</b><br>Patient and/or family consent<br>Capacity within HITH to accept the patient<br>Facility able to manage the care needs of the patient in the residential aged care facility (RACF)<br><br><b>Exclusion criteria:</b><br>Lack of consent from patient and/or family.<br>Behavioural disturbances, which may prevent the delivery of care e.g. aggressive behaviour and frequent removal of IV, access device.<br>History of recent falls, which may impact on the delivery of care in the RACF.<br>If there was conflict regarding management, further input and discussion were carried out in ACU.<br><br><b>Baseline characteristics of participants</b><br><br>TRC vs. ACU<br><b>Age</b> 83.5 vs. 82.8yrs<br><b>Female</b> 53 vs. 59%<br><b>Non-English speaking</b> 42 vs. 48%<br><b>High level of nursing home care</b> 72 vs. 76%<br><b>Dementia</b> 77.9 vs. 45.5% p<0.001<br><b>Charlson score</b> 7.1 SD 1.9 vs. 7.2 SD 2.3 | <p>In the ED the acuity of presenting complaint was triaged to maximize service capacity. Overnight referrals were assessed next morning, (those who presented after hours were put in Short Stay Unit adjacent to ED for assessment. TRC generally provided once daily visits for patient.</p> <p>The geriatrician &amp; team members would use clinical judgement to determine if a patient was suitable for TRC</p> <p><b>Outline of intervention</b><br/>Treatment in Residential Care facilities (TRC) delivered by the Residential Care Intervention Program into the Elderly (RECIPE) service between July-Oct 2008.</p> <p><b>Appropriate Clinical Diagnosis</b><br/>Dehydration, Pneumonia, Urinary Tract Infection, Gastroenteritis, Deep Venous Thrombosis, Terminal care support.</p> <p><b>Treatment can therefore include any of the following:</b><br/>IV antibiotics &amp; IV fluids<br/>Anticoagulation<br/>Oxygen therapy (low flow)<br/>Appropriate Allied Health intervention<br/>Palliative support*<br/>Referral to other appropriate support programs</p> <p>* [TRC also offered palliative care as appropriate. If patient's condition changed and management could not be continued, transfer into acute hospital was organized. If patients had uncertain prognosis, treatment was given, followed by palliative care if no response despite optimal treatment.]</p> <p><b>Intervention delivered by:</b><br/>Geriatrician, registrar and nursing staff with access to allied health staff such as physiotherapy, OT, speech pathology and social work.</p> | <b>Outline of control</b><br>Aged care unit (ACU)<br><br>Inpatients treated in ACU in preceding year July-October 2007, before existence of TRC.<br>ACU is a service for inpatients who have been admitted from residential care facilities for the management of general medical conditions.<br><br><b>Intervention delivered by:</b><br>No details but presumably usual hospital staff | <b>Relevant measures &amp; outcomes</b><br><br><b>Palliative care</b><br><br><b>Mortality on discharge</b><br><br><b>6-month mortality</b><br><br><b>Rehospitalisation within 1-month</b><br><br><b>Total hospitalisation at 6 months</b><br><br><b>Length of hospital care/stay</b><br><br>All measured as 'present or not'<br><br><b>Costs</b><br>None | TRC vs. ACU<br><b>Palliative care</b><br><b>34 (35.8%) 13 (7.8%) &lt;0.001</b><br><b>Mortality on discharge</b><br>11 (11.6%) 20 (12.0%)<br>p=0.924<br><b>6-month mortality</b><br>29 (30.5%) 51 (30.5%)<br>p=0.184<br><b>Re-hospitalization within 1 month</b><br>20 (21.1%) 35 (21.0%) p=0.986<br><b>Total re-hospitalization at 6 months</b><br>39 (41.1%) 68 (40.7%) p=0.963<br><b>Length of stay</b><br><b>Mean ( no SD given ) 2vs.11 days</b><br><b>P&lt;0.001</b><br>Equivalent of 270 vs. 1840 bed days |

# BMJ Open

**A systematic review to identify and assess the effectiveness of alternatives for people over the age of 65 who are at risk of potentially avoidable hospital admission.**

|                                 |                                                                                                                                                                                                                                                                                                                                                                                                                                                                                                                                                                                                                                                                                                                                                       |
|---------------------------------|-------------------------------------------------------------------------------------------------------------------------------------------------------------------------------------------------------------------------------------------------------------------------------------------------------------------------------------------------------------------------------------------------------------------------------------------------------------------------------------------------------------------------------------------------------------------------------------------------------------------------------------------------------------------------------------------------------------------------------------------------------|
| Journal:                        | <i>BMJ Open</i>                                                                                                                                                                                                                                                                                                                                                                                                                                                                                                                                                                                                                                                                                                                                       |
| Manuscript ID                   | bmjopen-2017-016236.R1                                                                                                                                                                                                                                                                                                                                                                                                                                                                                                                                                                                                                                                                                                                                |
| Article Type:                   | Research                                                                                                                                                                                                                                                                                                                                                                                                                                                                                                                                                                                                                                                                                                                                              |
| Date Submitted by the Author:   | 03-May-2017                                                                                                                                                                                                                                                                                                                                                                                                                                                                                                                                                                                                                                                                                                                                           |
| Complete List of Authors:       | Huntley, Alyson; University of Bristol , School of Social & Community Medicine<br>Chalder, Melanie; University of Bristol, School of Social & Community Medicine<br>Shaw, Ali; University of Bristol, School of Social & Community Medicine<br>Hollingworth, William; University of Bristol, School of Social & Community Medicine<br>Metcalf, Chris; University of Bristol, Bristol Randomised Trials Collaboration; University of Bristol , School of Social & Community medicine<br>Benger, Jonathan; The University Hospitals NHS Foundation trust, Academic Department of Emergency care; The University of the West of England, Faculty of Health & Life Sciences<br>Purdy, Sarah; University of Bristol, School of Social & Community Medicine |
| <b>Primary Subject Heading</b>: | Emergency medicine                                                                                                                                                                                                                                                                                                                                                                                                                                                                                                                                                                                                                                                                                                                                    |
| Secondary Subject Heading:      | Geriatric medicine                                                                                                                                                                                                                                                                                                                                                                                                                                                                                                                                                                                                                                                                                                                                    |
| Keywords:                       | GERIATRIC MEDICINE, Organisation of health services < HEALTH SERVICES ADMINISTRATION & MANAGEMENT, ACCIDENT & EMERGENCY MEDICINE                                                                                                                                                                                                                                                                                                                                                                                                                                                                                                                                                                                                                      |

SCHOLARONE™  
Manuscripts

03.05.17

A systematic review to identify and assess the effectiveness of alternatives for people over the age of 65 who are at risk of potentially avoidable hospital admission.

Alyson L Huntley\*  
Melanie Chalder<sup>1,2</sup>  
Alison Shaw<sup>1</sup>  
Will Hollingworth<sup>3</sup>  
Chris Metcalfe<sup>1,4</sup>  
Jonathan Benger<sup>5,6</sup>  
Sarah Purdy<sup>1</sup>

\*Corresponding author: Centre for Academic Primary Care, School of Social and Community Medicine, University of Bristol, Canynge Hall, 39 Whatley Road, Bristol BS8 2PS, UK [alyson.huntley@bristol.ac.uk](mailto:alyson.huntley@bristol.ac.uk) Tel: 0117 9287257

1. Centre for Academic Primary Care, School of Social and Community Medicine, University of Bristol, Canynge Hall, 39 Whatley Road, Bristol, BS8 2PS, UK
2. Brunelcare, Saffron Gardens, Prospect Place, Bristol, BS5 9FF, UK
3. Health Economics at Bristol, School of Social and Community Medicine University of Bristol, Canynge Hall, 39 Whatley Road, Bristol, BS8 2PS United Kingdom
4. Bristol Randomised Trials Collaboration, University of Bristol, 39 Whatley Road, Bristol, BS8 2PS, UK
5. Professor of Emergency Care, Faculty of Health and Applied Sciences, University of the West of England, Blackberry Hill, Bristol, BS16 1DD, Bristol, UK
6. Consultant in Emergency Medicine, University Hospitals Bristol NHS Foundation Trust, Marlborough Street, Bristol, BS1 3NU, UK

**Word count 4335**

**Key words:** Systematic review, emergency medical services, aged, hospitalization, hospital alternative

03.05.17

## ABSTRACT

### Background / objectives

There are some older patients who are 'at the decision margin' of admission. This systematic review sought to explore this issue with the following objective: What admission alternatives are there for older patients and are they safe, effective and cost-effective? A secondary objective was to identify the characteristics of those older patients for whom the decision to admit to hospital may be unclear.

### Design

Systematic review of controlled studies (April 2005-December 2016). The protocol is registered at PROSPERO (CRD42015020371). Studies were assessed using the Cochrane risk of bias criteria, and relevant reviews were assessed with the AMSTAR tool. The results are presented narratively and discussed.

### Setting

Primary and secondary health care interface.

### Participants

People aged over 65 years at risk of an unplanned admission.

### Interventions

Any community-based intervention offered as an alternative to admission to an acute hospital

### Primary and secondary outcomes measures

Reduction in secondary care use, patient-related outcomes, safety and costs.

### Results

Nineteen studies and 7 systematic reviews were identified. These recruited patients with both specific conditions and mixed chronic and acute conditions. The interventions involved paramedic/emergency care practitioners (n=3), emergency

03.05.17

1  
2  
3 department-based interventions (n=3), community hospitals (n=2), and hospital-at-  
4  
5 home services (n=11). Data suggest that alternatives to admission appear safe with  
6  
7 potential to reduce secondary care use and length of time receiving care. There is a  
8  
9 lack of patient-related outcomes and cost data. The important features of older  
10  
11 patients for whom the decision to admit is uncertain are: age over 75 years, co/multi-  
12  
13 morbidities, dementia, home situation, social support and individual coping abilities.  
14  
15

### 16 **Conclusions**

17  
18 This systematic review describes and assesses evidence on alternatives to acute  
19  
20 care for older patients and shows that many of the options available are safe and  
21  
22 appear to reduce resource use. However, cost analyses and patient preference data  
23  
24 are lacking.  
25  
26  
27  
28  
29  
30  
31  
32  
33  
34  
35  
36  
37  
38  
39  
40  
41  
42  
43  
44  
45  
46  
47  
48  
49  
50  
51  
52  
53  
54  
55  
56  
57  
58  
59  
60



03.05.17

## STRENGTHS AND LIMITATIONS OF THIS REVIEW

1. High quality systematic review of controlled studies.
2. Specific focus on admission avoidance interventions for acute care of older people.
3. Studies cover a wide range of acute conditions and acute exacerbation of chronic conditions in older people.
4. Some of the studies are pragmatic in approach and are at high risk of bias.
5. Most studies do not provide associated costs/cost analyses of interventions or patient preference data.

03.05.17

## Introduction

Reducing emergency bed days is one of the biggest challenges currently facing the National Health Service (NHS) in the United Kingdom (UK) and there is considerable pressure to reduce hospital admissions amongst older people throughout the developed world.<sup>1</sup> It has been suggested that clinicians should: 'choose to admit only those frail older people who have evidence of underlying life-threatening illness or need for surgery'.<sup>2</sup> In the UK there has been a 65% increase in hospital admissions for those over 75 years of age in the last decade. Furthermore, people over 85 years of age now account for 11% of emergency admissions and 25% of critical care bed days.<sup>3</sup> The international literature indicates that decisions to admit to an acute hospital are often influenced by inadequate knowledge of the patient or condition, communication difficulties between primary and secondary care, presence of co-morbidities, availability of test results, perceived benefits of in-patient care and patient preferences.<sup>4</sup> A review by NHS England highlighted the need to identify those frail and elderly people who need care but do not have a medical need requiring hospital admission.<sup>3</sup> It is clear that there are some older patients for whom care in the community is safe, perhaps with provision of additional services, and some for whom admission is required to deliver diagnostics or treatment that are only available in hospital. However, for those patients 'at the decision margin', the best path of action may be unclear.<sup>5</sup> The decision may be affected by non-clinical and clinical factors e.g. multi-morbidity, how much risk the patient or family are willing to accept.

Our specific objective was to conduct a systematic review to identify studies of community-based interventions aimed at reducing secondary care use in older patients with acute medical problems potentially requiring unscheduled hospital

03.05.17

admission. A secondary objective was to further confirm the characteristics of those older patients for whom the decision to admit to hospital may be unclear.

## Methods

### *Protocol and registration*

The protocol for the systematic review was registered at the PROSPERO register on 14/06/2015. Registration number is: CRD42015020371 (Supplementary material)

### *Eligibility criteria*

Publications of any randomised or non-randomised controlled trial (RCT or nRCT) which fitted our PICO criteria: a **P**opulation aged over 65 years, of either sex living in Organisation for Economic Co-operation and Development countries being considered for an unplanned admission, receiving either an **I**ntervention considered to be an alternative to acute hospital admission or acute hospital admission (**C**ontrol). The studies needed to record at least one of the following as either a primary or secondary **O**utcome: intervention effectiveness in terms of patient's subsequent ED attendance or readmission, patient-related outcomes, safety or healthcare costs.

### *Information sources and searches*

Medline, Medline In-Process, Embase, Cinahl and CENTRAL databases were searched from January 2005-April 2015 inclusive using search terms based on the eligibility criteria. (Appendix 1) An update was run in December 2016 across Medline and Medline In-Process. We included any relevant systematic reviews published 2010- 2016. The decision to time limit the searches was based on the fact that the systematic reviews would cover any older studies and that any evidence not included in these two sources was unlikely to be relevant to the fast changing

03.05.17

1  
2  
3 primary and secondary health care interface. The King's Fund and Agency for  
4  
5 Healthcare Research and Quality websites were also searched in April 2015.<sup>6,7</sup>  
6  
7 References were managed using EndNote X6 software and were screened by title  
8  
9 and abstract followed by full text, both independently and in duplicate (AH, BD),  
10  
11 using predefined inclusion/exclusion criteria. Any disagreements in either stage  
12  
13 were resolved using a third reviewer (SP). The reference lists of included studies  
14  
15 were checked and forward referencing was conducted using Google Scholar.  
16  
17 Authors of included studies were contacted for details of any extra studies.  
18  
19

### 20 21 22 ***Data items and collection process***

23  
24 Data from all primary studies (2005-2016) were extracted into a custom-designed  
25  
26 table. The main results and conclusions of recent high quality systematic reviews  
27  
28 (2010-2016) which included relevant primary studies were also recorded.  
29  
30

### 31 32 33 ***Assessment of risk of bias of individual studies (Appendix 2)***

34  
35 The Effective Practice and Organisation of Care Cochrane risk of bias tool was used  
36  
37 to critically appraise RCTs and nRCTs.<sup>8</sup>  
38  
39

### 40 41 42 ***Assessment of methodological quality of systematic reviews (AMSTAR)*** 43 44 ***(Appendix 3)***

45  
46 The AMSTAR checklist was used to assess the quality of the included systematic  
47  
48 reviews.<sup>9</sup>  
49  
50

03.05.17

### ***Synthesis of results***

The data are presented narratively describing, if present, the most relevant systematic review and/or individual studies for each intervention and, where appropriate, for a specific condition.

In order to identify the characteristics of those older patients for whom the decision to admit to hospital may be unclear, the inclusion/exclusion criteria and demographics of the participants were examined and key features were tabulated alongside the number and references of relevant studies.

03.05.17

Summary Table: RCT/nRCT and systematic evidence for alternative to admissions for the older population

| Intervention/<br>setting                                                                                                                 | Paramedic/<br>emergency care<br>practitioner                                                                                                                                                                                                                                                                                      | Emergency department                                                                                                                                                                                                                                                                                   | Community hospital                                                                                                                                                                                                                                                               | Hospital at home<br>Heart Failure                                                                                                                                                                                                   | Hospital at home<br>COPD                                                                                                                                                                                                                      | Hospital at home<br>Pulmonary embolism                                                                                                                                                         | Hospital at home<br>Pneumonia                                                                                                                                                                                                                                                 | Hospital at home<br>Stroke                                                                                                                                                                               | Hospital at home<br>Uncomplicated<br>diverticulitis                                                                     | Hospital at home<br>Older population with acute<br>medical problems                                                                                                                                                                                                                                                                                                                                                        |
|------------------------------------------------------------------------------------------------------------------------------------------|-----------------------------------------------------------------------------------------------------------------------------------------------------------------------------------------------------------------------------------------------------------------------------------------------------------------------------------|--------------------------------------------------------------------------------------------------------------------------------------------------------------------------------------------------------------------------------------------------------------------------------------------------------|----------------------------------------------------------------------------------------------------------------------------------------------------------------------------------------------------------------------------------------------------------------------------------|-------------------------------------------------------------------------------------------------------------------------------------------------------------------------------------------------------------------------------------|-----------------------------------------------------------------------------------------------------------------------------------------------------------------------------------------------------------------------------------------------|------------------------------------------------------------------------------------------------------------------------------------------------------------------------------------------------|-------------------------------------------------------------------------------------------------------------------------------------------------------------------------------------------------------------------------------------------------------------------------------|----------------------------------------------------------------------------------------------------------------------------------------------------------------------------------------------------------|-------------------------------------------------------------------------------------------------------------------------|----------------------------------------------------------------------------------------------------------------------------------------------------------------------------------------------------------------------------------------------------------------------------------------------------------------------------------------------------------------------------------------------------------------------------|
| <b>Primary studies identified</b><br><br>19 studies over 24 papers<br>n=10 RCT, n=9 nRCT                                                 | n=3<br>(RCT & 2 nRCT)<br>Mason 2007<br>Gray 2008<br>Mason 2012                                                                                                                                                                                                                                                                    | n=3<br>(RCT & 2 nRCT)<br>Sun 2014<br>Benaiges 2014<br>Salvi 2008                                                                                                                                                                                                                                       | n=2 RCT<br>Vicente 2014<br>Garåsen 2007,<br>2008ab                                                                                                                                                                                                                               | n=3 RCT<br>Mendoza<br>2009/García-<br>Soletto 2013<br>Tibaldi 2009<br>Patel 2008                                                                                                                                                    | n=1 RCT<br>Ricauda 2008                                                                                                                                                                                                                       | n=1 nRCT<br>Rodriguez-Cerillo<br>2009                                                                                                                                                          | n=1 RCT<br>Carratala 2005                                                                                                                                                                                                                                                     | n=1 RCT<br>(3 arm)<br>Kalra 2005                                                                                                                                                                         | n=1 nRCT<br>Rodriguez-Cerrillo 2013                                                                                     | n=3 nRCT<br>Leff 2005/2009/Frick 2009<br>Crilly 2011<br>Lau 2013                                                                                                                                                                                                                                                                                                                                                           |
| <b>Main conclusions of primary studies</b><br><br>Statistically significant differences between alternative care and acute hospital care | Mason RCT<br><b>Reduction:</b><br>Risk of ED attendance,<br>Risk of hospital readmission.<br><b>Increase:</b> Satisfaction with care<br>Mean duration of care<br>Subsequent unplanned contacts with secondary care<br><b>Comparable:</b><br>Mortality<br><br>Two nRCTs report greater reduction in admissions<br><br>No cost data | Sun RCT<br><b>Reduction:</b><br>Time of episode of care<br>Less likely to be admitted into hospital<br>Costs<br><b>Comparable:</b><br>Serious events<br>QoL<br>Satisfaction with care<br>*****<br>Benaiges nRCT<br><b>Reduction:</b><br>Readmissions<br>Costs<br>*****<br>Salvi nRCT<br>no differences | Vicente<br>Data limited. Neither formal analyses nor cost data presented.<br>*****<br>Garåsen<br><b>Reduction:</b><br>Hospital readmissions<br>Receiving any care at 26 wks<br>Deaths<br>Total costs & mean costs per patient<br><b>Increase:</b><br>Observation period<br>***** | Meta-analysis in systematic review                                                                                                                                                                                                  | <b>Reduction:</b><br>Readmissions<br>Mean cost per patient<br><b>Increase:</b><br>Length of stay.<br><b>Comparable:</b><br>Depression<br>QoL<br>Mortality                                                                                     | <b>Comparable:</b><br>Mean length of stay<br>No major bleeding, thrombosis or death in either group<br>No cost data                                                                            | <b>Increase:</b><br>Patients were satisfied with care<br><b>Comparable:</b><br>An overall 'successful outcome'<br>Readmissions<br>QoL<br>Adverse drug reactions<br>Medical complications<br>Mortality<br><br>No cost data                                                     | <b>Increase:</b><br>Mortality & institutionalisation<br><br><b>Reduction:</b> QoL scores basic activities of daily living<br><br>Costs were lower for HaH group but eclipsed by poorer patient outcomes. | Limited data.<br><b>Reduction:</b><br>Cost reduction of €1368 per patient.<br><b>Comparable:</b><br>Mean length of stay | Leff<br><b>Reduction:</b><br>Length of stay<br>Mean treatment cost<br><b>Comparable:</b><br>Use of health services<br>ED visits or readmission<br>*****<br>Crilly<br><b>Increase:</b><br>Longer time in ED<br><b>Comparable:</b><br>Length of episode of total care<br>No mortality or cost data<br>*****<br>Lau<br><b>Reduction:</b><br>Length of stay<br><b>Comparable:</b><br>Mortality<br>Readmissions<br>No cost data |
| <b>Systematic review identified</b>                                                                                                      | NO                                                                                                                                                                                                                                                                                                                                | NO                                                                                                                                                                                                                                                                                                     | NO                                                                                                                                                                                                                                                                               | Quaddoura 2015                                                                                                                                                                                                                      | Jeppesen 2012                                                                                                                                                                                                                                 | Vinson 2012                                                                                                                                                                                    | Chalmers 2011                                                                                                                                                                                                                                                                 | Shepperd 2016<br>Chalmers 2011                                                                                                                                                                           | Varney 2014                                                                                                             | NO                                                                                                                                                                                                                                                                                                                                                                                                                         |
| <b>Description of, and main conclusions of systematic review</b>                                                                         |                                                                                                                                                                                                                                                                                                                                   |                                                                                                                                                                                                                                                                                                        |                                                                                                                                                                                                                                                                                  | 3 RCTs as above used in meta-analysis<br><b>Increase:</b><br>Time to first readmission<br>HQoL at 6 & 12 mths<br><b>Reduction:</b><br>Costs for index treatment<br><b>Comparable:</b><br>Rate of readmission<br>All-cause mortality | 8 RCTs 7 did not fit inclusion criteria plus RCT detailed above.<br><b>Review summary:</b><br>Selected COPD patients can be safely & successfully treated at home.<br>Favourable readmission rates.<br>A trend towards reduced mortality rate | 7 observation studies plus one nRCT detailed above.<br><b>Review summary:</b><br>Data are limited, but evidence supports the feasibility & safety of for carefully selected low risk patients. | 5 studies comprising variety of designs plus one RCT detailed above.<br><b>Review summary:</b><br>Interventions appear safe.<br>Comparable for mortality, hospital readmissions patient satisfaction.<br>Insufficient data for quality of life or return to usual activities. | Two previous systematic reviews on a mixture of conditions including one RCT described above                                                                                                             | Integrative review on admission-avoidance HaH services and included one nRCT described above                            |                                                                                                                                                                                                                                                                                                                                                                                                                            |

03.05.17

## Results

The systematic review identified four types of intervention from across 19 studies published in 24 papers: paramedic/emergency care practitioners (n=3), emergency department (ED) interventions (n=3), community hospitals (n=2), hospital-at-home services (n=11).<sup>10-33</sup> (PRISMA diagram) (Appendix 4) Ten of the included studies were RCTs and nine were nRCTs. (Summary table) Fifteen studies were conducted in western European countries of which four were in the UK. Two studies were conducted in Australia and two studies in the United States (US). Risk of bias, general intervention description, AMSTAR and study data are detailed in the appendices. (Appendix 1) (Appendix 2)(Appendix 3) (Appendix 4)(Appendix 5)

There was an obvious divide between risk of bias of RCTs and nRCTs with the RCTs generally at low risk for most domains although for some domains there was insufficient information to be make a judgement (Appendix 2). The nRCTs were at high risk from not being randomised and in some studies there was a suggestion of health professional choice in allocation and as, with the RCTs, information was sometimes lacking. Risk of bias of individual studies is detailed below in the relevant section.

The AMSTAR ratings of the systematic reviews was generally good although some reviews did not list details of excluded studies, included studies of high risk of bias and did not perform publication bias analysis. (Appendix 3)

### ***Paramedic practitioner/emergency care practitioner (PP/ECP) interventions (Appendix 4)***

Three studies were identified<sup>10-12</sup> and no relevant recent systematic reviews.

03.05.17

1  
2  
3 A cluster RCT (Mason 2007), compared PPs with additional training (n=1469) with  
4 standard PPs (n=1549) in assessing and treating elderly people following 999 calls  
5 with the aim of measuring subsequent emergency care.<sup>10</sup> Similarly, two more recent  
6  
7  
8  
9  
10 nRCT investigated the role of ECPs in avoiding ED) attendance/admissions in  
11 elderly populations.<sup>11, 12</sup> Gray 2008 was a case-series study of ECP attendances for  
12 elderly patients aged over 65 years with a fall (n=233) compared with historical  
13 controls (n=772), and Mason 2012 was a cluster controlled study of enhanced ECP  
14 care for five care homes (n=256) compared with standard care in five other care  
15 homes (n=201). Risk of bias was low for all the domains of the cluster RCT and both  
16  
17  
18  
19  
20  
21  
22  
23 of the nRCT were at high risk due to lack of randomisation.

24  
25 In the cluster RCT, all primary outcomes comparing the intervention with the control  
26 group were improved: relative risk of ED attendance within 28 days (RR 0.72 (0.68,  
27 0.75)), relative risk of hospital admission within 28 days (RR 0.87 (0.81, 0.94)), being  
28  
29  
30  
31 very satisfied with care (RR 1.16 (1.09, 1.23)) and mean total episode duration in  
32 hours (-42.2 (-59.5,-25.0)) with a reported p<0.001 for all.<sup>10</sup> The secondary outcome  
33  
34  
35  
36 of mortality was comparable between groups, but intervention patients had a greater  
37  
38  
39  
40  
41  
42 number of subsequent unplanned contacts with secondary care at 28 days (330 vs.  
43  
44  
45  
46  
47  
48 259 p<0.01).

49  
50 The two nRCTs reported a greater reduction in admissions when comparing the  
51  
52  
53  
54  
55  
56  
57  
58  
59  
60  
61  
62  
63  
64  
65  
66  
67  
68  
69  
70  
71  
72  
73  
74  
75  
76  
77  
78  
79  
80  
81  
82  
83  
84  
85  
86  
87  
88  
89  
90  
91  
92  
93  
94  
95  
96  
97  
98  
99  
100  
101  
102  
103  
104  
105  
106  
107  
108  
109  
110  
111  
112  
113  
114  
115  
116  
117  
118  
119  
120  
121  
122  
123  
124  
125  
126  
127  
128  
129  
130  
131  
132  
133  
134  
135  
136  
137  
138  
139  
140  
141  
142  
143  
144  
145  
146  
147  
148  
149  
150  
151  
152  
153  
154  
155  
156  
157  
158  
159  
160  
161  
162  
163  
164  
165  
166  
167  
168  
169  
170  
171  
172  
173  
174  
175  
176  
177  
178  
179  
180  
181  
182  
183  
184  
185  
186  
187  
188  
189  
190  
191  
192  
193  
194  
195  
196  
197  
198  
199  
200  
201  
202  
203  
204  
205  
206  
207  
208  
209  
210  
211  
212  
213  
214  
215  
216  
217  
218  
219  
220  
221  
222  
223  
224  
225  
226  
227  
228  
229  
230  
231  
232  
233  
234  
235  
236  
237  
238  
239  
240  
241  
242  
243  
244  
245  
246  
247  
248  
249  
250  
251  
252  
253  
254  
255  
256  
257  
258  
259  
260  
261  
262  
263  
264  
265  
266  
267  
268  
269  
270  
271  
272  
273  
274  
275  
276  
277  
278  
279  
280  
281  
282  
283  
284  
285  
286  
287  
288  
289  
290  
291  
292  
293  
294  
295  
296  
297  
298  
299  
300  
301  
302  
303  
304  
305  
306  
307  
308  
309  
310  
311  
312  
313  
314  
315  
316  
317  
318  
319  
320  
321  
322  
323  
324  
325  
326  
327  
328  
329  
330  
331  
332  
333  
334  
335  
336  
337  
338  
339  
340  
341  
342  
343  
344  
345  
346  
347  
348  
349  
350  
351  
352  
353  
354  
355  
356  
357  
358  
359  
360  
361  
362  
363  
364  
365  
366  
367  
368  
369  
370  
371  
372  
373  
374  
375  
376  
377  
378  
379  
380  
381  
382  
383  
384  
385  
386  
387  
388  
389  
390  
391  
392  
393  
394  
395  
396  
397  
398  
399  
400  
401  
402  
403  
404  
405  
406  
407  
408  
409  
410  
411  
412  
413  
414  
415  
416  
417  
418  
419  
420  
421  
422  
423  
424  
425  
426  
427  
428  
429  
430  
431  
432  
433  
434  
435  
436  
437  
438  
439  
440  
441  
442  
443  
444  
445  
446  
447  
448  
449  
450  
451  
452  
453  
454  
455  
456  
457  
458  
459  
460  
461  
462  
463  
464  
465  
466  
467  
468  
469  
470  
471  
472  
473  
474  
475  
476  
477  
478  
479  
480  
481  
482  
483  
484  
485  
486  
487  
488  
489  
490  
491  
492  
493  
494  
495  
496  
497  
498  
499  
500  
501  
502  
503  
504  
505  
506  
507  
508  
509  
510  
511  
512  
513  
514  
515  
516  
517  
518  
519  
520  
521  
522  
523  
524  
525  
526  
527  
528  
529  
530  
531  
532  
533  
534  
535  
536  
537  
538  
539  
540  
541  
542  
543  
544  
545  
546  
547  
548  
549  
550  
551  
552  
553  
554  
555  
556  
557  
558  
559  
560  
561  
562  
563  
564  
565  
566  
567  
568  
569  
570  
571  
572  
573  
574  
575  
576  
577  
578  
579  
580  
581  
582  
583  
584  
585  
586  
587  
588  
589  
590  
591  
592  
593  
594  
595  
596  
597  
598  
599  
600  
601  
602  
603  
604  
605  
606  
607  
608  
609  
610  
611  
612  
613  
614  
615  
616  
617  
618  
619  
620  
621  
622  
623  
624  
625  
626  
627  
628  
629  
630  
631  
632  
633  
634  
635  
636  
637  
638  
639  
640  
641  
642  
643  
644  
645  
646  
647  
648  
649  
650  
651  
652  
653  
654  
655  
656  
657  
658  
659  
660  
661  
662  
663  
664  
665  
666  
667  
668  
669  
670  
671  
672  
673  
674  
675  
676  
677  
678  
679  
680  
681  
682  
683  
684  
685  
686  
687  
688  
689  
690  
691  
692  
693  
694  
695  
696  
697  
698  
699  
700  
701  
702  
703  
704  
705  
706  
707  
708  
709  
710  
711  
712  
713  
714  
715  
716  
717  
718  
719  
720  
721  
722  
723  
724  
725  
726  
727  
728  
729  
730  
731  
732  
733  
734  
735  
736  
737  
738  
739  
740  
741  
742  
743  
744  
745  
746  
747  
748  
749  
750  
751  
752  
753  
754  
755  
756  
757  
758  
759  
760  
761  
762  
763  
764  
765  
766  
767  
768  
769  
770  
771  
772  
773  
774  
775  
776  
777  
778  
779  
780  
781  
782  
783  
784  
785  
786  
787  
788  
789  
790  
791  
792  
793  
794  
795  
796  
797  
798  
799  
800  
801  
802  
803  
804  
805  
806  
807  
808  
809  
810  
811  
812  
813  
814  
815  
816  
817  
818  
819  
820  
821  
822  
823  
824  
825  
826  
827  
828  
829  
830  
831  
832  
833  
834  
835  
836  
837  
838  
839  
840  
841  
842  
843  
844  
845  
846  
847  
848  
849  
850  
851  
852  
853  
854  
855  
856  
857  
858  
859  
860  
861  
862  
863  
864  
865  
866  
867  
868  
869  
870  
871  
872  
873  
874  
875  
876  
877  
878  
879  
880  
881  
882  
883  
884  
885  
886  
887  
888  
889  
890  
891  
892  
893  
894  
895  
896  
897  
898  
899  
900  
901  
902  
903  
904  
905  
906  
907  
908  
909  
910  
911  
912  
913  
914  
915  
916  
917  
918  
919  
920  
921  
922  
923  
924  
925  
926  
927  
928  
929  
930  
931  
932  
933  
934  
935  
936  
937  
938  
939  
940  
941  
942  
943  
944  
945  
946  
947  
948  
949  
950  
951  
952  
953  
954  
955  
956  
957  
958  
959  
960  
961  
962  
963  
964  
965  
966  
967  
968  
969  
970  
971  
972  
973  
974  
975  
976  
977  
978  
979  
980  
981  
982  
983  
984  
985  
986  
987  
988  
989  
990  
991  
992  
993  
994  
995  
996  
997  
998  
999  
1000

None of the studies of PP/ECP interventions provided details of cost data or cost-effectiveness analysis.



03.05.17

**Emergency department (ED) interventions (Appendix 4)**

The searches identified one RCT (Sun 2014) which was assessed to be at low risk of bias, and two nRCT (Benaiges 2014, Salvi 2008) in which the risk of bias was high for several domains including randomisation.<sup>13-15</sup> No relevant, recent systematic reviews were identified.

Sun and colleagues conducted a RCT in which patients attending ED with syncope were randomised to receive either a syncope protocol in an observation unit (n=62) or usual care (n=62).<sup>13</sup> where the maximum stay in the observation unit could not exceed than 24 hours.

In terms of primary outcomes, patients randomised to the intervention spent less time in hospital at the index visit (29 vs. 47 hours p<0.001) and were less likely to be admitted to hospital (RR 0.16 (95% CI 0.09, 0.29) p<0.001). There were no differences in the secondary outcomes of serious events, quality of life (QoL) or satisfaction with care between groups. A reduction in costs was reported but no formal statistical comparison was performed (index visit US\$1400 vs. 2420, 30 days US\$1800 vs.2520 (2011 data)).

The first of the two nRCT compared usual care with treatment in a 'day hospital' for hyperglycaemic crisis from which the main result was improved readmission rates and associated costs (Benaiges 2014), whilst the second nRCT compared a specialist geriatric ED intervention with a standard ED procedure (Salvi 2008) but without evidence of any differences in outcome and had significant differences in baseline demographic data.<sup>14,15</sup>

03.05.17

**Community hospital (CH) interventions** (Appendix 4)

Two RCTs were identified describing a community hospital (CH) intervention as an alternative to acute hospital (AH) care<sup>16-19</sup> and no relevant, recent systematic reviews.

Both RCTs were at low risk of bias overall. In the RCT by Vicente, participants were randomised following triage at home to either go to a CH (n=410) or to the ED (n=396).<sup>16</sup> The data presented were limited. The authors reported that the nurse attending the patient at home sent 90 intervention participants to the CH (primary outcome) although six of those individuals were subsequently transferred from the CH to the ED (secondary outcome). There were no formal statistical analyses nor were cost data presented.

The Garåsen RCT compared CH care (n=72) to AH care (n=72) and was published over three separate papers.<sup>17-19</sup> There was no distinction between primary and secondary outcomes. At 26 weeks, there were fewer readmissions in the CH group versus the AH group (19% vs. 36%, p=0.02) and more people receiving no care (25% vs. 10%, p=0.01). At 12 months, there were fewer deaths in the CH group (18% vs. 31%, p=0.03) although the observation period was considerably longer in the CH group (335.7 vs. 292.8 days, p=0.01). Total cost of treatment was less in the CH group compared with those receiving AH care NOK 39,650 ((95% CI kr 30 996-48,304) versus NOK 73,417 (95% CI NOK 52 992-93,843)) data collected 2003-2005 (p = 0.002). Average health services costs per patient/day for the entire observation period was NOK 606 (95% CI £ 450- 761) in the CH group compared to NOK 802 (95% CI NOK 641-962) in the AH group (p = 0.026).

03.05.17

#### ***Hospital-at-Home (HaH) interventions (Appendix 4)***

Eight of the HaH studies were focused on specific conditions: heart failure (n=3), chronic obstructive pulmonary disease (n=1), pulmonary embolism (n=1), pneumonia (n=1), stroke (n=1), and uncomplicated diverticulitis (n=1).<sup>20-28</sup> The remaining three HaH studies recruited older participants with a range of conditions, and two of these recruited from residential homes.<sup>29-33</sup> All the specific condition studies were included in recent (2010-2016) systematic reviews<sup>34-40</sup> but no relevant reviews for the older participants with a range of conditions were identified.

#### ***Heart failure (HF)***

Three RCTs were identified on HaH for HF and their results published in four separate papers.<sup>20-23</sup> These studies were included in two previous reviews of HaH one which focused on HF (Quaddoura 2015).<sup>34,35</sup> This review used the Cochrane risk of bias tool and described the overall quality of the RCTs as modest. The AMSTAR rating of the review highlighted a lack of description of excluded studies and the combination of different QoL measures in meta-analysis.

In the Quaddoura systematic review the patients were randomised to either HaH or AH within the ED and the primary outcomes of the review were hospital readmissions and mortality. HaH increased time to first readmission (mean difference (MD) 14.13 days [95% CI 10.36, 17.91] p=0.015 using data from two RCTs (n=132).<sup>22-23</sup> although there was no strong evidence of an effect on the rate of readmission (RR 0.68 [0.42, 1.09]) using data from two RCTs (n=172).<sup>20,22</sup> This is a sizeable reduction, but consistent with chance in a data set of this size. An improvement was reported in health-related QoL at both 6 and 12 months

03.05.17

1  
2  
3 (standardized MD (SMD) -0.31 [-0.45 to -0.18]; SMD -0.17 [-0.31 to -0.02]  
4  
5 respectively). HaH was comparable to AH care on all-cause mortality (RR 0.94 (0.67,  
6  
7 1.32)) using data from all three RCTs. These studies also showed a significant  
8  
9 reduction in costs for the index treatment period ( $p < 0.001$ ). Two trials<sup>20,23</sup> reported  
10  
11 lower costs in the HaH group at 12 months, although the difference was not  
12  
13 statistically significant in one of the studies.<sup>20</sup> When the authors of this particular  
14  
15 review calculated total costs for these two trials, both indicated a cost reduction for  
16  
17 HaH compared to AH care.  
18  
19

### 20 21 22 *Chronic obstructive pulmonary disease (COPD)*

23  
24 An RCT by Ricauda was published in 2008 and was also included in two recent  
25  
26 systematic reviews - one focusing on COPD and one more generally on HaH.<sup>24,35,36</sup>  
27  
28 The high quality COPD review included eight RCTs, one of which described HaH in  
29  
30 an early discharge setting, plus the Ricauda trial and six which were published prior  
31  
32 to our 2005 inclusion date.  
33

34  
35 The Ricauda RCT compared HaH (n=52) with AH (n=52) and was conducted with  
36  
37 low risk of bias. The primary outcomes were hospital readmission and mortality  
38  
39 rates at 6 months. The secondary outcomes included a range of depression,  
40  
41 functional, cognitive and nutritional measures as well as costs.  
42  
43

44  
45 The study showed that there were fewer hospital readmissions for HaH patients  
46  
47 compared to AH patients at 6 months (42% vs 87%,  $p = 0.001$ ) although HaH patients  
48  
49 had a longer length of stay than those in the AH group (15.5 SD $\pm$ 9.5 vs 11.0  $\pm$ SD 7.9  
50  
51 days,  $p = 0.01$ ). Whilst HaH patients experienced improvements in depression and  
52  
53 QoL scores during the study, there was no evidence of difference between the two  
54  
55  
56  
57  
58  
59  
60

03.05.17

1  
2  
3 groups for these outcomes at 6 months. Cumulative mortality at 6 months was  
4  
5 comparable between groups (20.2%).  
6  
7

8 All patients discharged from HaH completed the care programme at home, whereas  
9  
10 11.5% of AH patients continued their care in a long-term facility after hospital  
11  
12 discharge, with an average daily cost of \$174.7 for a mean period of 25 ±8.7 days.  
13  
14 Overall - on a cost per patient per day basis - HaH care was less expensive than that  
15  
16 given to the AH group (\$101.4 ± 61.3 vs \$151.7 ±96.4, p=0.002). This RCT reflected  
17  
18 the results of the published systematic review.<sup>36</sup>  
19  
20  
21  
22  
23

### 24 *Pulmonary embolism*

25  
26 Our review identified one published nRCT of HaH (Rodriguez-Cerillo 2009) for  
27  
28 patients with pulmonary embolism which was also included in a recent systematic  
29  
30 review with seven other observational studies (Vinson 2012).<sup>25,37</sup> The high quality  
31  
32 review concluded that the overall incidence of mortality at 90 days was very low.  
33  
34  
35  
36

37 The nRCT compared HaH (n=30) with AH (n=31) and was at high risk of bias  
38  
39 overall.<sup>25</sup> No distinctions between primary and secondary outcomes were made.  
40  
41 Mean length of stay was not statistically different comparing HaH with the AH group  
42  
43 (8.9 days (7–14 days) vs. 10.6 days (6–20 days)). No patients treated at home  
44  
45 required unexpected return to hospital during admission. There was no major  
46  
47 bleeding, thrombosis or death in either group at 90 days in the nRCT.<sup>25</sup> There were  
48  
49 no cost data reported.  
50  
51  
52  
53  
54  
55  
56  
57  
58  
59  
60

03.05.17

### *Pneumonia*

Our review identified one RCT (Carratala 2005) published and included in a recent systematic review (Chalmers 2011) which also described a further five studies comprising a variety of designs).<sup>26,38</sup> The RCT compared HAH (n=110) with AH (n=114) and was at low risk of bias. The primary outcome was the percentage of patients with an 'overall successful outcome' according to seven predefined criteria<sup>26</sup> whilst secondary outcomes were patients' QoL and satisfaction.

An overall successful outcome was achieved in 83.6% of HaH patients and 80.7% of AH patients (absolute difference 2.9% [95% CI, 7.1-12.9]). Subsequent hospital admissions were comparable between groups (6.3 vs. 7.0%). More HaH patients were satisfied with their overall care (91.2 vs. 79.1%; ab 12.1% [CI, 1.8 to 22.5%]). Reported QoL scores were comparable between groups as was the percentage of patients with adverse drug reactions (9.1 vs. 9.6%), medical complications (0.9 vs. 2.6%), and overall mortality (0.9 vs. 0%) for HAH and AH patient groups respectively. There were no cost data presented. This RCT data reflects the result of the systematic review by Chalmers 2011.<sup>38</sup>

### *Stroke*

One RCT on HaH for stroke patients (Kalra 2005) was published and also included in two previous systematic reviews.<sup>27,35,39</sup> This RCT was at low risk of bias. The primary outcome measure was death or institutionalisation at one year. This three-arm study randomised patients into care on a stroke unit (SU) (n=152), care in a general ward (GW) with stroke expert advice (n=152) and HaH with stroke expert advice (n=153) within 72 hours after recruitment in the ED department.

03.05.17

1  
2  
3 Mortality and institutionalisation at one year were lower in the SU group compared  
4 with either the GW (14 vs. 30%,  $p < 0.001$ ) or HaH groups (14 vs. 24%,  $p=0.03$ ).  
5  
6 Significantly fewer patients cared for on the SU died compared with those in the GW  
7 group (9 vs. 23%,  $p = 0.001$ ). The SU group showed greater improvement on basic  
8 activities of daily living compared with the other two groups (change in Barthel Index  
9 10 vs. 7,  $p < 0.002$ ). QoL at three months was significantly better in SU and HaH  
10 patients. There was greater dissatisfaction with care in the GW group compared with  
11 SU or HaH groups. The total costs of stroke care per patient over 12 months (data  
12 collected 2005-2008) were £11,450 for the SU group, £9527 for GW group and  
13 £6840 for HaH group.  
14  
15  
16  
17  
18  
19  
20  
21  
22  
23  
24

#### 25 26 *Uncomplicated diverticulitis*

27  
28 Our systematic review found one nRCT (Rodriguez-Cerrillo 2013).<sup>28</sup> This study was  
29 also included in a recent, moderate quality integrative review on admission-  
30 avoidance HaH services.<sup>40</sup> This nRCT compared HaH (n=34) with AH (n=18) for  
31 patients with uncomplicated diverticulitis and was, overall, at high risk of bias with no  
32 defined primary or secondary outcomes were defined. No statistical detail was  
33 provided about any of the data presented. None of the patients treated at home were  
34 transferred to the acute hospital. The mean length of stay in the intervention group  
35 was 9 days, compared with 10 days in AH. HaH treatment was associated with a  
36 cost reduction of €1368 per patient.  
37  
38  
39  
40  
41  
42  
43  
44  
45  
46  
47  
48

#### 49 50 *Older population with acute medical problems*

51  
52 There were three studies identified published over five papers<sup>29-33</sup> and no relevant  
53 recent systematic reviews. One nRCT recruited acutely ill older persons and was  
54 published across three separate papers (Leff 2005, main publication).<sup>29-31</sup> This nRCT  
55  
56  
57  
58  
59  
60

03.05.17

1  
2  
3 compared HaH (n=169) with AH (n=286) with the majority of patients being identified  
4  
5 the morning after admission. The study was at high risk of bias.<sup>29</sup> There was no  
6  
7 distinction made between primary and secondary outcomes. Patients treated with  
8  
9 HaH had a shorter length of stay compared with those given AH care (3.2 vs. 4.9  
10  
11 days, p =0.004). The mean treatment cost was lower for HaH care than for acute  
12  
13 hospital care (\$5081 vs. \$7480, p< 0.001). Eight weeks after admission, there were  
14  
15 no differences in the use of health services between HaH and AH patients in terms  
16  
17 of ED visits, (0.23 (SD 0.66) 0.22 (SD 0.57)) or readmission (0.28 (SD 0.59) 0.27  
18  
19 (SD 0.55)).  
20  
21  
22  
23  
24

25 The nRCT by Crilly 2010 recruited elderly nursing home patients presenting at ED  
26  
27 but who were willing to receive care back in their nursing home (n=62) and  
28  
29 compared these with historical control care home patients who had been  
30  
31 hospitalised (n=115). The study was at high risk of bias<sup>32</sup> and no primary outcomes  
32  
33 were specified. Intervention participants experienced a longer time in ED than those  
34  
35 who had been admitted into hospital (9.94 vs. 7.01 hours p=0.005) but required less  
36  
37 time being subsequently cared for (2.19 vs. 6.2 days p<0.001). Overall, the length of  
38  
39 an episode of care in days (9.56 (1.26) vs. 6.20 (0.59) days, p=0.14) and the number  
40  
41 of readmissions within 28 days (11.3 vs. 11.3, p=0.99) were not statistically different  
42  
43 between the two groups. There were no mortality or cost data presented.  
44  
45  
46  
47

48 The nRCT by Lau 2013 assessed residents of a care home presenting at ED who  
49  
50 were subsequently treated back in their care home (n=95) and compared data with  
51  
52 historical hospital controls i.e. not from care homes (n=167).<sup>33</sup> No primary outcomes  
53  
54 were specified and the study was at high risk of bias. Length of stay was significantly  
55  
56 shorter for those in the intervention group compared with the controls (2.0 vs. 11.0  
57  
58  
59  
60



03.05.17

1  
2  
3 days  $p < 0.001$ ) although mortality (11 (11.6%) vs. 20 (12.0%),  $p = 0.924$ ) and  
4  
5 readmission rates (39 (41.1%) vs. 68 (40.7%),  $p = 0.963$ ) at 6 months were  
6  
7 comparable between groups. There were no cost data presented.  
8  
9

10  
11 ***Characteristics of those older patients for whom the decision to admit to***  
12  
13 ***hospital may be unclear (Appendix 6)***  
14

15  
16 Fifteen of the studies included in our systematic review recruited a population with a  
17  
18 mean age of more than 75 years, despite the inclusion criterion specifying those over  
19  
20 65 years. Whilst 9/19 studies specifically stated their recruited population was multi-  
21  
22 morbid, it is plausible that all the study populations were and so this is very likely to  
23  
24 be a factor which impacts on decision-making in acute medical care. Eight studies  
25  
26 specified a particular degree of severity for dementia as an inclusion criterion but, in  
27  
28 practice, this is a difficult assessment to make in the acute care context. There were  
29  
30 inclusion/exclusion criteria in nine of the studies which specified the importance  
31  
32 taking account of an individual's home situation, social support networks and coping  
33  
34 abilities as part of the decision-making process.  
35  
36  
37  
38  
39  
40  
41  
42  
43  
44  
45  
46  
47  
48  
49  
50  
51  
52  
53  
54  
55  
56  
57  
58  
59  
60

03.05.17

## Discussion

### *Summary of principal findings*

The findings of our systematic review show that alternatives to acute hospital care at the point of potential admission for people aged over 65 years can be safe, with comparable mortality and clinical outcomes across a range of acute and chronic conditions. They also have the potential to reduce healthcare spending. The exception to the evidence of benefit of HaH is the treatment of stroke patients, who fare much worse with HaH intervention compared to treatment in a stroke unit. The authors of this study suggest that these differences are due to the overall expertise available in the stroke unit as opposed to care given by generic hospital or homecare staff advised by specialised stroke health professionals. It is recommended therefore that in most cases, in line with current NHS practice for stroke, care should to be provided in specialist units.<sup>41</sup> The key features of older patients for whom the decision to admit may be uncertain are age more than 75 years, co/multi-morbidities, dementia, home situation, social support and individual coping abilities.

### *Comparison with previous literature*

As part of our systematic review, any relevant systematic review published in 2010-2016 was included and referred to when discussing the more recent studies. All of these reviews were on the topic of HaH interventions. In addition to being older evidence, some of the previous reviews in contrast to our own included a number of uncontrolled observational studies. Some also included studies in which HaH interventions were applied in the non-emergency or post-discharge settings. By contrast, our systematic review focuses on bringing together controlled studies on

03.05.17

1  
2  
3 alternatives to acute hospitalisation at the point of potential admission for the over  
4  
5 65s.

### 6 7 *Clinical and research implications*

8  
9 For health professionals, making a decision to admit an older patient can prove very  
10  
11 difficult. Decision-making for each individual patient draws upon a range of  
12  
13 professional experience and expertise, and should also be influenced by broader  
14  
15 factors such as living conditions and individual/family/carer coping, in addition to care  
16  
17 preferences. If alternatives to acute admission are available, health professionals  
18  
19 must be confident about using these alternative pathways for their patients<sup>5</sup> and  
20  
21 whilst many of the interventions in this review may provide viable alternatives to  
22  
23 acute care, they may not exist in some healthcare communities or geographical  
24  
25 regions. Nevertheless, our review suggests that where established alternatives to  
26  
27 admission exist, clinicians should offer these with a degree of confidence and not  
28  
29 assume that hospital admission is always the best or safest option for their patient.  
30  
31

32  
33 Future research should aim to provide more comprehensive evidence of both the  
34  
35 clinical and cost effectiveness of a wider range of hospital alternatives for a greater  
36  
37 range of health issues, as well as exploring in more detail the determinants and  
38  
39 outcomes of decision-making under conditions of uncertainty. Many of the studies  
40  
41 included in this review recruited highly defined populations and it would be helpful to  
42  
43 understand whether the findings can be replicated in more general patient groups.  
44  
45 There is also much to be done to improve the collection of data on patient-related  
46  
47 outcomes, carer and health professional acceptability, and costs.  
48  
49

### 50 51 *Strengths and limitations of review*

52  
53 Our systematic review was conducted to high methodological standards.<sup>42</sup> The  
54  
55 majority of evidence presented is based on HaH services, although this includes  
56  
57  
58  
59  
60

03.05.17

1  
2  
3 treatment of a wide range of conditions. Whilst not all the included studies were  
4  
5 randomised or considered to be at low risk of bias, these issues are clearly  
6  
7 highlighted and the included studies cover a variety of alternative approaches to  
8  
9 hospital admission. The majority of the included studies offer little or no cost data  
10  
11 which makes it difficult to assess the cost-effectiveness of any these alternatives to  
12  
13 acute hospital care. Whilst writing our protocol we planned to carry out a meta-  
14  
15 analysis on suitable data. However, the data we identified were insufficient, in terms  
16  
17 of quantity (i.e. often drawn from a single study), quality (i.e. from nRCT) or  
18  
19 homogeneity. Where sufficient data were identified - on HaH for heart failure – an  
20  
21 analysis had already been conducted within a previous review.<sup>34</sup>  
22  
23  
24  
25

26 In conclusion, this systematic review describes and assesses evidence on  
27  
28 alternatives to acute care for older patients and shows that many of the options  
29  
30 available are safe and appear to reduce resource use.  
31  
32  
33  
34  
35  
36  
37  
38  
39  
40  
41  
42  
43  
44  
45  
46  
47  
48  
49  
50  
51  
52  
53  
54  
55  
56  
57  
58  
59  
60

03.05.17

### **Funding statement**

This paper presents research funded by the National Institute for Health Research (NIHR) as part of their Programme Development Grant scheme (RP-DG-1213-10004). The views expressed are those of the authors and not necessarily those of the NHS, the NIHR or the Department of Health.

### **Competing interests**

None of the authors have any competing interests to declare

### **Acknowledgements**

Ben Davies (BD) of the Centre for Academic Primary Care, School of Social and Community Medicine at the University of Bristol for providing systematic review support to AH.

Helen England, formerly of Bris-DOC, for providing advice to SP and the wider study team.

Sue Jenkins, lay representative, who co-led a PPI session with MC exploring the relevance of the study findings with a group of older lay representatives including Alma Brooks, Matt Pepper, Joan Pepper, Tom Doyle, and Liz Banks-Jones.

03.05.17

### Authors' contribution

**ALH** Research Fellow and lead systematic reviewer conducting all stages of the review and responsible for the initial draft of paper.

**MC** Research Fellow with specific expertise in Patient and Public Involvement (PPI) as well as older age community care. Contributing to discussion as the review progressed. Commenting and editing on the drafts of the paper.

**AH** Senior Research Fellow with specific expertise in patient-related outcomes. Contributing to discussion as the review progressed. Commenting and editing on the drafts of the paper.

**WH** Professor with specific expertise in health economics. Contributing to discussion as the review progressed. Commenting and editing on the drafts of the paper.

**CM** Reader with specific expertise in trial design and statistical analysis. Contributing to discussion as the review progressed. Commenting and editing on the drafts of the paper.

**JB** Professor with specific expertise in emergency care. Contributing to discussion as the review progressed. Commenting and editing on the drafts of the paper.

**SP** Principal Investigator and Professor with specific expertise in primary health care. Third reviewer of data. Commenting and editing on the drafts of the paper.

### Data sharing statement

This is a systematic review and all the data we have collected is either in the main text and summary table or in the on-line appendices.

03.05.17

**References**

1. D'Souza S, Guptha S. Preventing admission of older people to hospital. *BMJ* 2013 May 20; 346: f3186
2. Philp I. Community services. Reasons for redesigning care for older people. *Health Serv J* 2012; 122(6331):30-2.
3. NHS England, 2013. Bed availability and occupancy accessed at: <https://www.england.nhs.uk/statistics/statistical-work-areas/bed-availability-and-occupancy/> on 20/12/16
4. Hammond CL, Pinnington LL, Phillips MF. A qualitative examination of inappropriate hospital admissions and lengths of stay. *BMC Health Serv Res* 2009; 9:44.
5. Walsh B, Lattimer V, Wintrup J *et al*. Professional perspectives on systemic barriers to admission avoidance: learning from a system dynamics study of older people's admission pathways. *Internat J Older People Nursing* 2015; 10(2):105-14.
6. The King's Fund, accessed at: <https://www.kingsfund.org.uk/> on the 18/01/2017
7. AHRQ, accessed at: <http://www.ahrq.gov/> on the 18/01/2017
8. EPOC risk of bias criteria accessed at: <http://epoc.cochrane.org/sites/epoc.cochrane.org/files/public/uploads/Suggested%20risk%20of%20bias%20criteria%20for%20EPOC%20reviews.pdf> on 18/01/17
9. Shea BJ, Grimshaw JM, Wells GA *et al*. Development of AMSTAR: a measurement tool to assess the methodological quality of systematic reviews. *BMC Med Res Methodol* 2007; 7:10.
10. Mason S, Knowles E, Colwell B *et al*. Effectiveness of paramedic practitioners in attending 999 calls from elderly people in the community a cluster randomised controlled trial. *BMJ* 2007 Nov 3; 335(7626):919.
11. Gray JT, Walker A. Avoiding admissions from the ambulance service: a review of elderly patients with falls and patients with breathing difficulties seen by Emergency Care Practitioners in South Yorkshire. *Emerg Med J* 2008; 25(3):168-71.

03.05.17

12. Mason S, O'Keeffe C, Knowles E *et al.* A pragmatic quasi experimental multi-site community intervention trial evaluating the impact of Emergency Care Practitioners in different UK health settings on patient pathways (NEECaP Trial. *Emerg Med J* 2012; 29(1):47-53.
13. Sun BC, McCreath H, Liang LJ *et al.* Randomized clinical trial of an emergency department observation syncope protocol versus routine inpatient admission. *Ann Emerg Med* 2014; 64(2):167-75.
14. Benaiges D, Chillarón JJ, Carrera MJ *et al.* Efficacy of treatment for hyperglycemic crisis in elderly diabetic patients in a day hospital. *Clin Interv Aging* 2014; 9:843-9.
15. Salvi F, Morichi V, Grilli A *et al.* A geriatric emergency service for acutely ill elderly patients: pattern of use and comparison with a conventional Emergency Department in Italy. *J Am Geriatr Soc.* 2008 56(11):2131-8.
16. Vicente V, Svensson L, Wireklint Sundström B *et al.* Randomized controlled trial of a prehospital decision system by emergency medical services to ensure optimal treatment for older adults in Sweden. *J Am Geriatr Soc* 2014; 62(7):1281-7
17. Garåsen H, Windspoll R, Johnsen R. Intermediate care at a community hospital as an alternative to prolonged general hospital care for elderly patients: a randomised controlled trial. *BMC Public Health* 2007 May 2; 7:68. **Main publication**
18. Garåsen H Magnussen J Windspoll R *et al.* Elderly patients in hospitals or nursing homes in intermediæravdeling - A cost analysis. *Tidsskr Nor Lægeforen* 2008a; 128: 283-5 (Danish)
19. Garåsen H, Windspoll R, Johnsen R. Long term patients' outcomes after intermediate care at a community hospital for elderly patients: 12-month follow-up of a randomized controlled trial. *Scand J Public Health* 2008b; 36(2):197-204.
20. Mendoza H, Martín MJ, García A *et al.* Hospital at home care model as an effective alternative in the management of decompensated chronic heart failure. *Eur J Heart Fail* 2009; 11(12):1208-13. **main publication**
21. García-Soletto A, Parraza-Diez N, Aizpuru-Barandiaran F *et al.* Comparative study of quality of life after hospital-at-home or in-patient admission for acute decompensation of chronic heart failure. *World Journal of Cardiovascular Diseases* 2013; 3; 174-181.



03.05.17

- 1
  - 2
  - 3
  - 4
  - 5
  - 6
  - 7
  - 8
  - 9
  - 10
  - 11
  - 12
  - 13
  - 14
  - 15
  - 16
  - 17
  - 18
  - 19
  - 20
  - 21
  - 22
  - 23
  - 24
  - 25
  - 26
  - 27
  - 28
  - 29
  - 30
  - 31
  - 32
  - 33
  - 34
  - 35
  - 36
  - 37
  - 38
  - 39
  - 40
  - 41
  - 42
  - 43
  - 44
  - 45
  - 46
  - 47
  - 48
  - 49
  - 50
  - 51
  - 52
  - 53
  - 54
  - 55
  - 56
  - 57
  - 58
  - 59
  - 60
22. Tibaldi V, Isaia G, Scarafiotti C *et al.* Hospital at home for elderly patients with acute decompensation of chronic heart failure: a prospective randomized controlled trial. *Arch Intern Med* 2009; 169(17):1569-75.
23. Patel H, Shafazand M, Ekman I *et al.* Home care as an option in worsening chronic heart failure- a pilot study to evaluate feasibility, quality adjusted life years and cost-effectiveness. *Eur J Heart Fail* 2008; 10(7):675-81.
24. Ricauda Aimonino N, Tibaldi V, Leff B *et al.* Substitutive "hospital at home" versus inpatient care for elderly patients with exacerbations of chronic obstructive pulmonary disease: a prospective randomized, controlled trial. *J Am Geriatr Soc* 2008; 56(3):493-500.
25. Rodríguez-Cerrillo M, Alvarez-Arcaya A, Fernández-Díaz E *et al.* A prospective study of the management of non-massive pulmonary embolism in the home. *Eur J Intern Med* 2009; 20(6):598-600.
26. Carratalà J, Fernández-Sabé N, Ortega L *et al.* Outpatient care compared with hospitalization for community-acquired pneumonia: a randomized trial in low-risk patients. *Ann Intern Med* 2005; 142(3):165-72.
27. Kalra L, Evans A, Perez I *et al.* A randomised controlled comparison of alternative strategies in stroke care. *Health Technol Assess* 2005; 9(18): iii-iv, 1-79.
28. Rodríguez-Cerrillo M, Poza-Montoro A, Fernandez-Diaz E *et al.* Treatment of elderly patients with uncomplicated diverticulitis, even with comorbidity, at home. *Eur J Intern Med* 2013; 24(5):430-2.
29. Leff B, Burton L, Mader SL *et al.* Hospital at home: feasibility and outcomes of a program to provide hospital-level care at home for acutely ill older patients. *Ann Intern Med* 2005; 143(11):798-808. **main publication**
30. Leff B, Burton L, Mader SL *et al.* Comparison of functional outcomes associated with hospital at home care and traditional acute hospital care. *J Am Geriatr Soc* 2009; 57(2):273 -8.
31. Frick KD, Burton LC, Clark R *et al.* Substitutive Hospital at Home for older persons: effects on costs. *Am J Manag Care* 2009; 15(1):49-56.
32. Crilly J, Chaboyer W, Wallis M *et al.* An outcomes evaluation of an Australian Hospital in the Nursing Home admission avoidance programme. *J Clin Nurs* 2011; 20(7-8):1178-87.

03.05.17

- 1
- 2
- 3 33. Lau L, Chong CP, Lim WK. Hospital treatment in residential care facilities is a
- 4 viable alternative to hospital admission for selected patients. *Geriatr Gerontol*
- 5 *Int* 2013; 13(2):378-83.
- 6
- 7
- 8 34. Qaddoura A, Yazdan-Ashoori P, Kabali C *et al*. Efficacy of Hospital at home
- 9 in patients with Heart Failure: A Systematic Review and Meta-Analysis. *PLoS*
- 10 *One* 2015; 10(6):e0129282.
- 11
- 12
- 13 35. Shepperd S, Iliffe S, Doll HA, Clarke MJ, Kalra L, Wilson AD, Gonçalves-
- 14 Bradley DC. Admission avoidance hospital at home. *Cochrane Database Syst*
- 15 *Rev*. 2016 Sep 1; 9:CD007491.
- 16
- 17
- 18 36. Jeppesen E, Brurberg KG, Vist GE *et al*. Hospital at home for acute
- 19 exacerbations of chronic obstructive pulmonary disease. *Cochrane Database*
- 20 *Syst Rev* 2012; 5:CD003573.
- 21
- 22
- 23 37. Vinson DR, Zehtabchi S, Yealy DM. Can selected patients with newly
- 24 diagnosed pulmonary embolism be safely treated without hospitalization? A
- 25 systematic review. *Ann Emerg Med* 2012; 60(5):651-662.
- 26
- 27
- 28 38. Chalmers JD, Akram AR, Hill AT. Increasing outpatient treatment
- 29 of mild community-acquired pneumonia: systematic review and meta-analysis.
- 30 *Eur Respir J* 2011; 37(4):858-64.
- 31
- 32
- 33 39. Caplan GA. A meta-analysis of "hospital in the home". *Med J Aust* 2013;
- 34 198(4):195-6.
- 35
- 36
- 37 40. Varney J, Weiland, TJ, Jelinek G. Efficacy of hospital in the home services
- 38 providing care for patients admitted from emergency departments: an
- 39 integrative review. *Internat J Evidence-Based Healthcare* 2014; 12(2): 128–
- 40 141.
- 41
- 42
- 43 41. NICE pathway for stroke accessed at
- 44 <https://pathways.nice.org.uk/pathways/stroke> on 20/12/16
- 45
- 46
- 47 42. Higgins JPT, Green S (editors). *Cochrane Handbook for Systematic Reviews of*
- 48 *Interventions* Version 5.1.0 [updated March 2011]. The Cochrane Collaboration,
- 49 2011.
- 50
- 51
- 52
- 53
- 54
- 55
- 56
- 57
- 58
- 59
- 60

PRISMA flow diagram

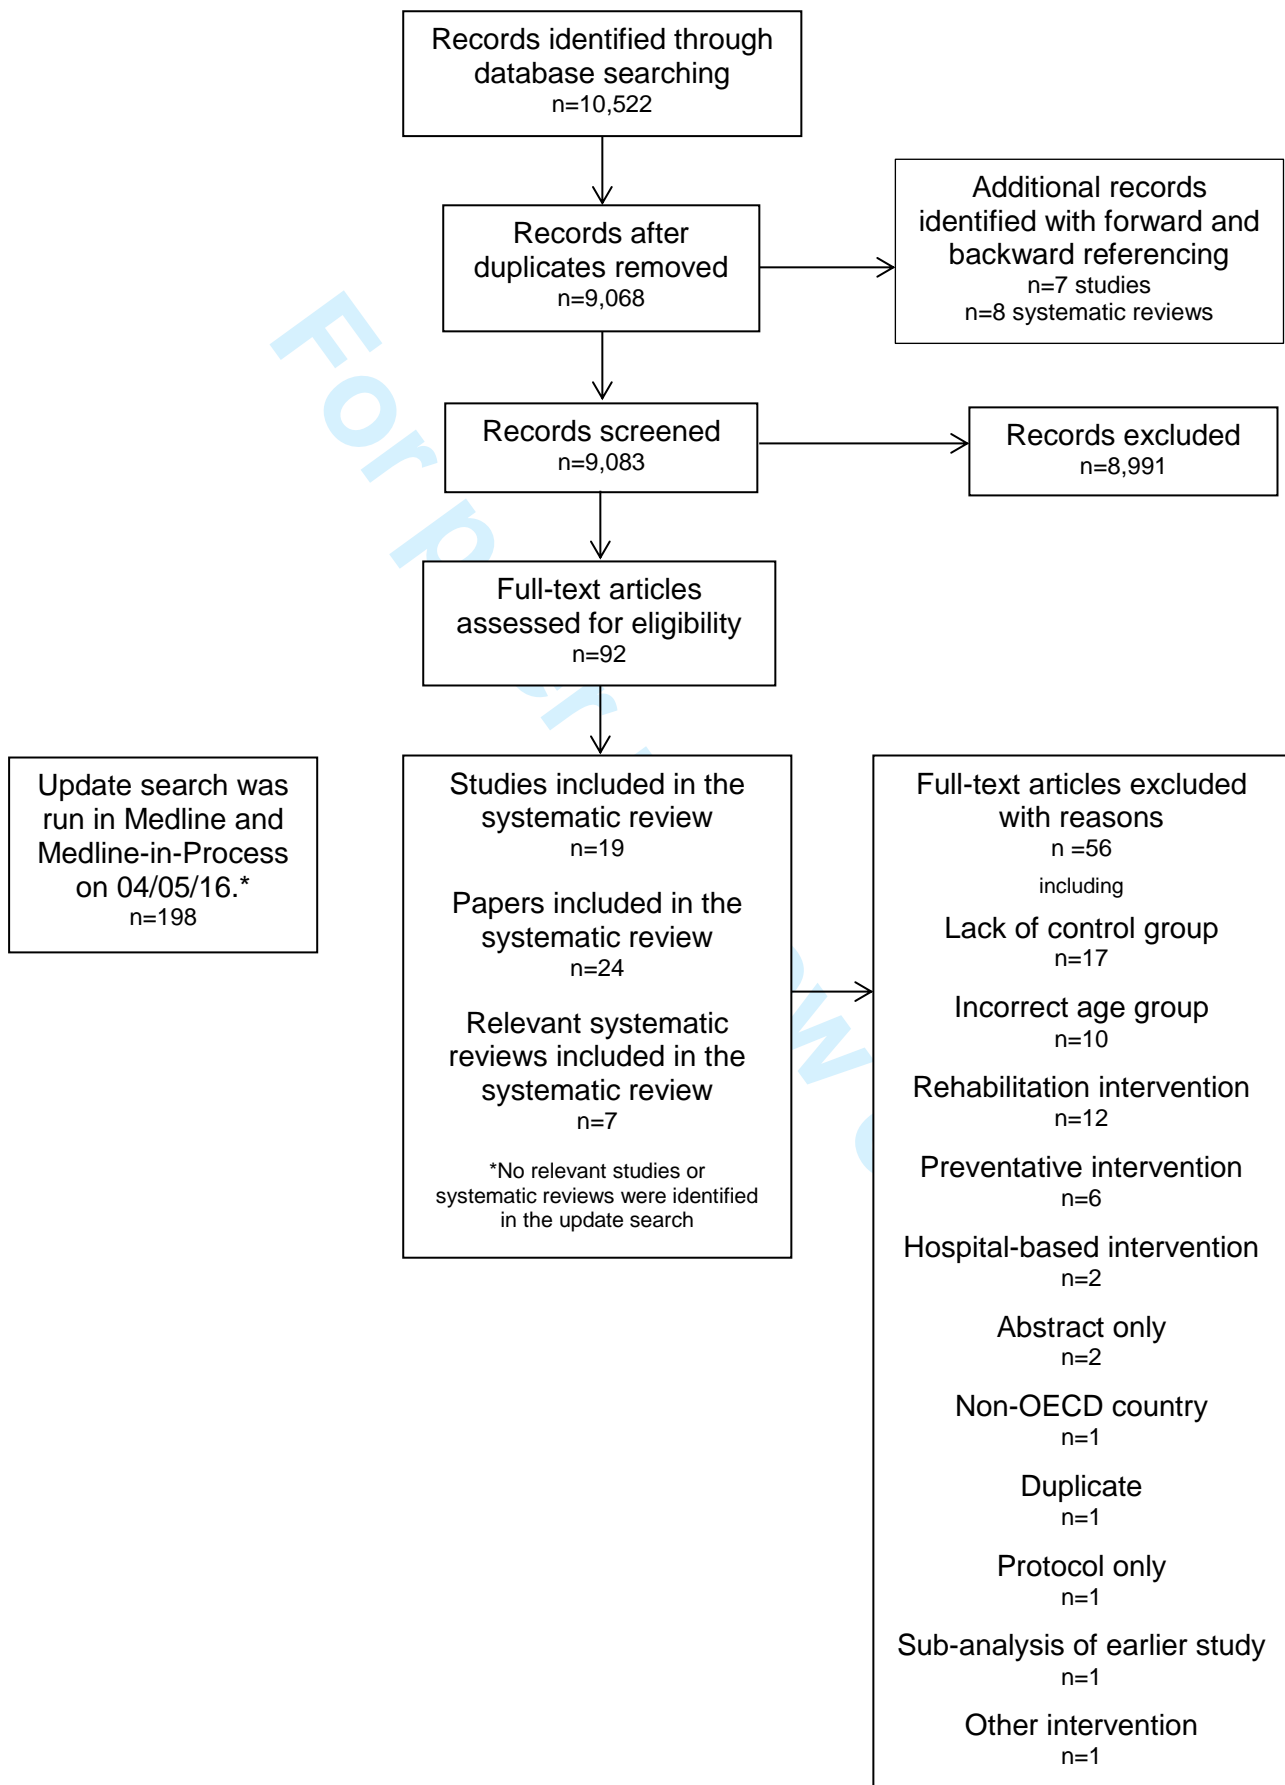

## Appendix 1: Parent search strategy run in Medline

Database: Medline In-process - current week, Medline 1950 to present

Search Strategy: Run April 24<sup>th</sup> 2015

- 1 intervention?.ti. or (intervention? adj6 (clinician? or collaborat\$ or community or complex or DESIGN\$ or doctor? or educational or family doctor? or family physician? or family practitioner? or financial or GP or general practice? or hospital? or impact? or improv\$ or individuali?e? or individuali?ing or interdisciplin\$ or multicomponent or multi-component or multidisciplin\$ or multidisciplin\$ or multifacet\$ or multi-facet\$ or multimodal\$ or multi-modal\$ or personali?e? or personali?ing or pharmacies or pharmacist? or pharmacy or physician? or practitioner? or prescrib\$ or prescription? or primary care or professional\$ or provider? or regulatory or regulatory or tailor\$ or target\$ or team\$ or usual care)).ab. (178760)
- 2 (pre-intervention? or preintervention? or "pre intervention?" or post-intervention? or postintervention? or "post intervention?").ti,ab. (11719)
- 3 (hospital\$ or patient?).hw. and (study or studies or care or health\$ or practitioner? or provider? or physician? or nurse? or nursing or doctor?).ti,hw. (747131)
- 4 demonstration project?.ti,ab. (2027)
- 5 (pre-post or "pre test\$" or pretest\$ or posttest\$ or "post test\$" or (pre adj5 post)).ti,ab. (72037)
- 6 (pre-workshop or post-workshop or (before adj3 workshop) or (after adj3 workshop)).ti,ab. (653)
- 7 trial.ti. or ((study adj3 aim?) or "our study").ab. (697929)
- 8 (before adj10 (after or during)).ti,ab. (375455)
- 9 ("quasi-experiment\$" or quasiexperiment\$ or "quasi random\$" or quasirandom\$ or "quasi control\$" or quasicontrol\$ or ((quasi\$ or experimental) adj3 (method\$ or study or trial or design\$))).ti,ab,hw. (107858)
- 10 ("time series" adj2 interrupt\$).ti,ab,hw. (1212)
- 11 (time points adj3 (over or multiple or three or four or five or six or seven or eight or nine or ten or eleven or twelve or month\$ or hour? or day? or "more than")).ab. (10245)
- 12 pilot.ti. (43282)
- 13 Pilot projects/ (86631)
- 14 (clinical trial or controlled clinical trial or multicenter study).pt. (644558)
- 15 (multicentre or multicenter or multi-centre or multi-center).ti. (31588)

- 1  
2  
3  
4 16 random\$.ti,ab. or controlled.ti. (809402)  
5 17 (control adj3 (area or cohort? or compare? or condition or design or group? or  
6 intervention? or participant? or study)).ab. not (controlled clinical trial or  
7 randomized controlled trial).pt. (440969)  
8  
9 18 Aged/ (2394306)  
10 19 "Aged, 80 and over"/ (647729)  
11 20 older adults.mp. (38411)  
12 21 elderly adults.mp. (2417)  
13 22 over 65 years.mp. (3421)  
14 23 virtual ward.mp. (12)  
15 24 intermediate care.mp. (1478)  
16 25 Crisis response.mp. (103)  
17 26 Crisis resolution.mp. (99)  
18 27 reablement.mp. (12)  
19 28 re-ablement.mp. (11)  
20 29 hospital care at home.mp. (14)  
21 30 hospital-at-home.mp. (289)  
22 31 home hospital.mp. (150)  
23 32 medical day hospital care.mp. (2)  
24 33 day hospital.mp. (2435)  
25 34 out-patient facility.mp. (13)  
26 35 Domiciliary care.mp. (247)  
27 36 intermediate services.mp. (7)  
28 37 Intermediate Care Facilities/ (639)  
29 38 Home Care Services, Hospital-Based/ (1662)  
30 39 Home Health Nursing/ (58)  
31 40 Home Nursing/ (8049)  
32 41 admission avoidance.mp. (56)  
33 42 outreach program.mp. (677)  
34 43 hospital outreach.mp. (27)  
35 44 nursing-led units.mp. (3)  
36 45 hospital in home.mp. (8)  
37 46 hospital in the home.mp. (123)  
38 47 medical home care.mp. (39)  
39  
40  
41  
42  
43  
44  
45  
46  
47

- 1  
2  
3 48 Crisis intervention service.mp. (31)  
4  
5 49 Geriatric emergency management practice model.mp. (1)  
6  
7 50 day unit.mp. (169)  
8  
9 51 Day Care/ (4670)  
10  
11 52 day centre.mp. (170)  
12  
13 53 comprehensive elderly care.mp. (2)  
14  
15 54 Substitutive care.mp. (1)  
16  
17 55 shared care.mp. (916)  
18  
19 56 guided care.mp. (69)  
20  
21 57 home-based versus hospital-based.mp. (11)  
22  
23 58 home hospitalisation.mp. (28)  
24  
25 59 rapid response team.mp. (515)  
26  
27 60 rapid response nurse.mp. (2)  
28  
29 61 Hospitals, Community/ (10479)  
30  
31 62 \*Ambulatory Care/ (15963)  
32  
33 63 \*Health Services for the Aged/ (12112)  
34  
35 64 or/1-17 (3278427)  
36  
37 65 or/23-63 (57831)  
38  
39 66 or/18-22 (2428347)  
40  
41 67 64 and 65 and 66 (11288)  
42  
43 68 67 not (child/ or infant/ or adolescent/ or maternal health services/) (9807)  
44  
45 69 68 not (case report/ or case study/ or letter/ or editorial/ or expert opinion.mp.)  
46 [mp=title, abstract, original title, name of substance word, subject heading  
47 word, keyword heading word, protocol supplementary concept word, rare  
48 disease supplementary concept word, unique identifier] (9192)  
49  
50 70 69 not (Algeria\$ or Egypt\$ or Liby\$ or Morocc\$ or Tunisia\$ or Western  
51 Sahara\$ or Angola\$ or Benin or Botswana\$ or Burkina Faso or Burundi or  
52 Cameroon or Cape Verde or Central African Republic or Chad or Comoros or  
53 Congo or Djibouti or Eritrea or Ethiopia\$ or Gabon or Gambia\$ or Ghana or  
54 Guinea or Keny\$ or Lesotho or Liberia or Madagasca\$ or Malawi or Mali or  
55 Mauritania or Mauritius or Mayotte or Mozambiq\$ or Namibia\$ or Niger or  
56 Nigeria\$ or Reunion or Rwand\$ or Saint Helena or Senegal or Seychelles or  
57 Sierra Leone or Somalia or South Africa\$ or Sudan or Swaziland or Tanzania  
58 or Togo or Ugand\$ or Zambia\$ or Zimbabw\$ or China or Chinese or Hong  
59 Kong or Macao or Mongolia\$ or Taiwan\$ or Belarus or Moldov\$ or Russia\$ or  
60 Ukraine or Afghanistan or Armenia\$ or Azerbaijan or Bahrain or Cyprus or  
Cypriot or Georgia\$ or Iran\$ or Iraq\$ or Israel\$ or Jordan\$ or Kazakhstan or  
Kuwait or Kyrgyzstan or Leban\$ or Oman or Pakistan\$ or Palestin\$ or Qatar or  
Saudi Arabia or Syria\$ or Tajikistan or Turkmenistan or United Arab Emirates

1  
2  
3  
4 or Uzbekistan or Yemen or Bangladesh\$ or Bhutan or British Indian Ocean  
5 Territory or Brunei Darussalam or Cambodia\$ or India\$ or Indonesia\$ or Lao or  
6 People's Democratic Republic or Malaysia\$ or Maldives or Myanmar or Nepal  
7 or Philippin\$ or Singapore or Sri Lanka or Thai\$ or Timor Leste or Vietnam or  
8 Albania\$ or Andorra or Bosnia\$ or Herzegovina\$ or Bulgaria\$ or Croatia\$ or  
9 Estonia or Faroe Islands or Greenland or Liechtenstein or Lithuanian\$ or  
10 Macedonia or Malta or maltese or Romania or Serbia\$ or Montenegro or  
11 Slovenia or Svalbard or Argentina\$ or Belize or Bolivia\$ or Brazil\$ or Chile or  
12 Chilean or Colombia\$ or Costa Rica\$ or Cuba or Ecuador or El Salvador or  
13 French Guiana or Guatemala\$ or Guyana or Haiti or Honduras or Jamaica\$ or  
14 Nicaragua\$ or Panama or Paraguay or Peru or Puerto Rico or Suriname or  
15 Uruguay or Venezuela or developing countr\$ or south America\$).ti,sh. (8719)  
16  
17

- 18 71 admission\*.ab. (140603)  
19  
20 72 hospital\*.ab. (747796)  
21  
22 73 71 or 72 (804011)  
23  
24 74 70 and 73 (3851)  
25  
26 75 limit 74 to yr="2005 -Current" (1880)  
27  
28 76 remove duplicates from 75 (1829)  
29  
30  
31  
32  
33  
34  
35  
36  
37  
38  
39  
40  
41  
42  
43  
44  
45  
46  
47  
48  
49  
50  
51  
52  
53  
54  
55  
56  
57  
58  
59  
60



## Appendix 2: EPOC Risk of bias

### *Paramedic (PP) / emergency care practitioner (ECP) interventions*

#### Study: Mason 2007 RCT - older population with mixed conditions

| Bias                                                                        | Authors' judgement | Support for judgement                                                                                                                                                                                                                                                                                                                                                                                                                                                                                                                  |
|-----------------------------------------------------------------------------|--------------------|----------------------------------------------------------------------------------------------------------------------------------------------------------------------------------------------------------------------------------------------------------------------------------------------------------------------------------------------------------------------------------------------------------------------------------------------------------------------------------------------------------------------------------------|
| Was allocation sequence adequately generated?                               | Low risk           | 'We used cluster randomisation to reduce the risk of contamination (practice in the control group being influenced by the presence of the paramedic practitioner in the community) and to allow service level, rather than individual patient level, evaluation of the intervention. Weeks were randomised before the start of the study (to allow for rostering of the paramedic practitioners) to the paramedic practitioner service being active (intervention) or inactive (control), when the standard 999 service was available' |
| Was allocation adequately concealed?                                        | Low risk           | 'Episode of care with some form of centralised randomisation scheme'                                                                                                                                                                                                                                                                                                                                                                                                                                                                   |
| Were baseline outcome measurements similar?                                 | Unclear risk       | No baseline measure of outcomes since they were related to receiving intervention e.g. ED attendance                                                                                                                                                                                                                                                                                                                                                                                                                                   |
| Were baseline characteristics similar?                                      | Low risk           | Baseline characteristics of intervention and control groups were reported and similar                                                                                                                                                                                                                                                                                                                                                                                                                                                  |
| Were incomplete outcome data adequately addressed?                          | Low risk           | Flow of patients through trial was presented and intention-to-treat analysis used                                                                                                                                                                                                                                                                                                                                                                                                                                                      |
| Was knowledge of allocated interventions adequately prevented during study? | Low risk           | Majority of outcomes were objective but there was one about satisfaction with service i.e. subjective                                                                                                                                                                                                                                                                                                                                                                                                                                  |
| Was study adequately protected against contamination?                       | Low risk           | 'We used cluster randomisation to reduce the risk of contamination (practice in the control group being influenced by the presence of the paramedic practitioner in the community) and to allow service level, rather than individual patient level, evaluation of the intervention'.                                                                                                                                                                                                                                                  |
| Was study free from selective outcome reporting?                            | Low risk           | All outcome measures described in methods section were reported in results section                                                                                                                                                                                                                                                                                                                                                                                                                                                     |
| Was study free from other risks of bias?                                    | Low risk           | Nothing obvious                                                                                                                                                                                                                                                                                                                                                                                                                                                                                                                        |

#### Study: Gray 2008 historical controls - older people with falls

| Bias                                                                        | Authors' judgement | Support for judgement                                                                                                                                                                                                                                                                                                                                                                                             |
|-----------------------------------------------------------------------------|--------------------|-------------------------------------------------------------------------------------------------------------------------------------------------------------------------------------------------------------------------------------------------------------------------------------------------------------------------------------------------------------------------------------------------------------------|
| Was allocation sequence adequately generated?                               | High risk          | 'From January to April 2006 inclusive, all the patients seen by the ECP service who had rung 999 with a diagnosis of either breathing difficulties or an elderly patient (.65 years of age) with a fall were reviewed.' 'Comparison data were taken from January to April 2005 inclusive for attendances to the same ED for patients with the same criteria as above seen by non-ECP ambulance service personnel' |
| Was allocation adequately concealed?                                        | High risk          | As above                                                                                                                                                                                                                                                                                                                                                                                                          |
| Were baseline outcome measurements similar?                                 | Unclear risk       | No baseline measure of outcomes since they were related to receiving intervention e.g. ED attendance                                                                                                                                                                                                                                                                                                              |
| Were baseline characteristics similar?                                      | Unclear risk       | No details given other than 'elderly patients >65yrs with a fall'                                                                                                                                                                                                                                                                                                                                                 |
| Were incomplete outcome data adequately addressed?                          | Unclear risk       | No reference to missing data or how it might be handled                                                                                                                                                                                                                                                                                                                                                           |
| Was knowledge of allocated interventions adequately prevented during study? | Low risk           | Outcome measures were all objective                                                                                                                                                                                                                                                                                                                                                                               |
| Was study adequately protected against contamination?                       | Low risk           | Different data collection time-periods were reported for each group                                                                                                                                                                                                                                                                                                                                               |
| Was study free from selective outcome reporting?                            | Low risk           | All outcome measures described in methods section were reported in results section                                                                                                                                                                                                                                                                                                                                |
| Was study free from other risks of bias?                                    | Low risk           | Only used half of the study population                                                                                                                                                                                                                                                                                                                                                                            |

#### Study: Mason 2012 'quasi experimental' - older population with mixed conditions

| Bias                                                                        | Authors' judgement | Support for judgement                                                                                                                                                                                                                                                                                                                                                  |
|-----------------------------------------------------------------------------|--------------------|------------------------------------------------------------------------------------------------------------------------------------------------------------------------------------------------------------------------------------------------------------------------------------------------------------------------------------------------------------------------|
| Was allocation sequence adequately generated?                               | High risk          | 'Potential 'intervention' trust sites were selected on the basis of their heterogeneity of service delivery of ECP care. 'Control' trust sites that did not employ ECPs, but were in close geographical proximity (i.e. within the same or in a neighbouring county) and which offered the same service configurations as the intervention trusts, were then selected' |
| Was allocation adequately concealed?                                        | High risk          | As above                                                                                                                                                                                                                                                                                                                                                               |
| Were baseline outcome measurements similar?                                 | Unclear risk       | No baseline measure of outcomes since they were related to receiving intervention e.g. ED attendance                                                                                                                                                                                                                                                                   |
| Were baseline characteristics similar?                                      | High risk          | For the care home subgroup, figures were given on selected baseline characteristics but no formal comparison appeared to be made. On face value, clinical characteristics were not balanced e.g. adult medical 30 vs.41%, adult trauma 46 vs.13%                                                                                                                       |
| Were incomplete outcome data adequately addressed?                          | Unclear risk       | No reference to missing data or how it might be handled                                                                                                                                                                                                                                                                                                                |
| Was knowledge of allocated interventions adequately prevented during study? | Low risk           | Outcome measures were all objective                                                                                                                                                                                                                                                                                                                                    |
| Was study adequately protected against contamination?                       | Low risk           | Intervention and control were delivered in different locations                                                                                                                                                                                                                                                                                                         |
| Was study free from selective outcome reporting?                            | Low risk           | All outcome measures described in methods section were reported in results section                                                                                                                                                                                                                                                                                     |
| Was study free from other risks of bias?                                    | Low risk           | Nothing obvious                                                                                                                                                                                                                                                                                                                                                        |



## Emergency Department (ED) interventions

### Study: Sun 2014 RCT - syncope

| Bias                                                                        | Authors' judgement | Support for judgement                                                                                                                                                                                                                         |
|-----------------------------------------------------------------------------|--------------------|-----------------------------------------------------------------------------------------------------------------------------------------------------------------------------------------------------------------------------------------------|
| Was allocation sequence adequately generated?                               | Low risk           | 'Patients were block randomized (n=4) by site in a 1:1 ratio to either the observation protocol or routine inpatient admission'                                                                                                               |
| Was allocation adequately concealed?                                        | Low risk           | 'A computer generated the study arm assignment at randomization, and no research personnel had advance knowledge of study arm assignment. We could not blind this health service intervention to patients, providers, or research personnel.' |
| Were baseline outcome measurements similar?                                 | Unclear risk       | No baseline measure of outcomes since they were related to receiving intervention e.g. inpatient admission rates                                                                                                                              |
| Were baseline characteristics similar?                                      | Low risk           | Baseline characteristics of intervention and control groups were reported and similar                                                                                                                                                         |
| Were incomplete outcome data adequately addressed?                          | Low risk           | Flow chart of participants provided and intention-to-treat analysis performed                                                                                                                                                                 |
| Was knowledge of allocated interventions adequately prevented during study? | Low risk           | Outcome measures were objective but one secondary outcome - participant satisfaction - was subjective                                                                                                                                         |
| Was study adequately protected against contamination?                       | Unclear risk       | Treatment and control were allocated and delivered in same location so possible for participants to swap allocation                                                                                                                           |
| Was study free from selective outcome reporting?                            | Low risk           | All outcome measures described in methods section were reported in results section                                                                                                                                                            |
| Was study free from other risks of bias?                                    | Low risk           | Nothing obvious                                                                                                                                                                                                                               |

### Study: Salvi 2008 CT - older population with mixed conditions

| Bias                                                                        | Authors' judgement | Support for judgement                                                                                                                                                                                            |
|-----------------------------------------------------------------------------|--------------------|------------------------------------------------------------------------------------------------------------------------------------------------------------------------------------------------------------------|
| Was allocation sequence adequately generated?                               | High risk          | 'Trained research assistant (VM) screened patients presenting to the ED for Monday to Friday from 9:00 a.m to 6:00 p.m using a standard information sheet explaining the study protocol to patients and proxies' |
| Was allocation adequately concealed?                                        | High risk          | As above                                                                                                                                                                                                         |
| Were baseline outcome measurements similar?                                 | Unclear risk       | No baseline measure of outcomes since they were related to receiving intervention e.g. number of initial admissions                                                                                              |
| Were baseline characteristics similar?                                      | High risk          | Intervention and control groups were unbalanced - age, 78.1(7) vs.82.5(7.2) p<0.001, female 47 vs. 68% p=0.004, married 70 vs. 40% p<0.001, SPMSQ 2.5(3.3) vs. 5.2(4.2) p<0.001, ADL4.3(2) vs. 3.2(2.5) p=0.001  |
| Were incomplete outcome data adequately addressed?                          | Unclear risk       | No reference to missing data or how it might be handled                                                                                                                                                          |
| Was knowledge of allocated interventions adequately prevented during study? | Low risk           | All outcome measures were objective                                                                                                                                                                              |
| Was study adequately protected against contamination?                       | Unclear risk       | Treatment and control were delivered in different locations                                                                                                                                                      |
| Was study free from selective outcome reporting?                            | Low risk           | All outcome measures described in methods section were reported in results section                                                                                                                               |
| Was study free from other risks of bias?                                    | Low risk           | Nothing obvious                                                                                                                                                                                                  |

### Study: Benaiges 2014 CT - hyperglycaemia

| Bias                                                                        | Authors' judgement | Support for judgement                                                                                                                                                                                                          |
|-----------------------------------------------------------------------------|--------------------|--------------------------------------------------------------------------------------------------------------------------------------------------------------------------------------------------------------------------------|
| Was allocation sequence adequately generated?                               | High risk          | 'Patients were assigned to the DH group if they were admitted to hospital within DH opening hours (weekdays from 8:00 a.m to 4:00 p.m); otherwise they were treated in the emergency department and subsequently hospitalized' |
| Was allocation adequately concealed?                                        | High risk          | As above                                                                                                                                                                                                                       |
| Were baseline outcome measurements similar?                                 | Unclear risk       | No baseline measure of outcomes since they were related to receiving intervention e.g. number of ER visits                                                                                                                     |
| Were baseline characteristics similar?                                      | Low risk           | Baseline characteristics of treatment and control groups were reported and similar                                                                                                                                             |
| Were incomplete outcome data adequately addressed?                          | Unclear risk       | No reference to missing data or how it might be handled                                                                                                                                                                        |
| Was knowledge of allocated interventions adequately prevented during study? | Low risk           | All outcome measures were objective                                                                                                                                                                                            |
| Was study adequately protected against contamination?                       | Low risk           | 'Patients were treated with same protocol for both DH and CH' so contamination was possible                                                                                                                                    |
| Was study free from selective outcome reporting?                            | Low risk           | All outcome measures described in methods section were reported in results section                                                                                                                                             |
| Was study free from other risks of bias?                                    | Low risk           | Nothing obvious                                                                                                                                                                                                                |

## Community hospital interventions

### Study: Vicente 2014 RCT

| Bias                                                                        | Authors' judgement | Support for judgement                                                                                                                                                                                                                                                                                                                                                                |
|-----------------------------------------------------------------------------|--------------------|--------------------------------------------------------------------------------------------------------------------------------------------------------------------------------------------------------------------------------------------------------------------------------------------------------------------------------------------------------------------------------------|
| Was allocation sequence adequately generated?                               | Low risk           | 'The dispatchers at the EMCC randomized older adults into the study. A sealed envelope randomization procedure was initiated when the dispatcher received the incoming call and identified the participant as an individual aged 65 who resided in the specified geographical area and was assigned a priority level 2 or 3, and the call occurred between 8:00 a.m. and 10:00 p.m.' |
| Was allocation adequately concealed?                                        | Low risk           | 'The envelope contained the name of the EMS Company 1 or the name of the EMS Company 2. There was an equal chance (1:1) of being assigned to either of the ambulance companies'                                                                                                                                                                                                      |
| Were baseline outcome measurements similar?                                 | Unclear risk       | No baseline measure of outcomes since they were related to receiving intervention e.g. number of individuals sent direct to community hospital                                                                                                                                                                                                                                       |
| Were baseline characteristics similar?                                      | High risk          | There was a difference in the priority level when ambulance sent out (% individuals) – Level 1) 1.6 vs. 0%, Level 2) 59 vs. 47%, Level 3) 39 vs.53%, p=0.001                                                                                                                                                                                                                         |
| Were incomplete outcome data adequately addressed?                          | Unclear risk       | No reference to missing data or how it might be handled                                                                                                                                                                                                                                                                                                                              |
| Was knowledge of allocated interventions adequately prevented during study? | Low risk           | All outcome measures were objective                                                                                                                                                                                                                                                                                                                                                  |
| Was study adequately protected against contamination?                       | Low risk           | Separate sealed envelope opened for each individual case                                                                                                                                                                                                                                                                                                                             |
| Was study free from selective outcome reporting?                            | Low risk           | All outcome measures described in methods section were reported in results section                                                                                                                                                                                                                                                                                                   |
| Was study free from other risks of bias?                                    | Low risk           | Nothing obvious                                                                                                                                                                                                                                                                                                                                                                      |

### Study: Garasen 2007/8 ab RCT - older population with mixed conditions

| Bias                                                                        | Authors' judgement | Support for judgement                                                                                                                                                                                          |
|-----------------------------------------------------------------------------|--------------------|----------------------------------------------------------------------------------------------------------------------------------------------------------------------------------------------------------------|
| Was allocation sequence adequately generated?                               | Low risk           | 'When an eligible patient was identified and accepted for inclusion, a blinded randomisation was performed by the Clinical Research Department using random number tables in blocks to ensure balanced groups' |
| Was allocation adequately concealed?                                        | Low risk           | As above                                                                                                                                                                                                       |
| Were baseline outcome measurements similar?                                 | Unclear risk       | No baseline measure of outcomes since they were related to receiving intervention e.g. number of readmissions for index disease                                                                                |
| Were baseline characteristics similar?                                      | Unclear risk       | Baseline characteristics of intervention and control groups were described but no formal comparison reported                                                                                                   |
| Were incomplete outcome data adequately addressed?                          | Unclear            | No reference to missing data or how it might be handled                                                                                                                                                        |
| Was knowledge of allocated interventions adequately prevented during study? | Low risk           | All outcome measures were objective                                                                                                                                                                            |
| Was study adequately protected against contamination?                       | Low risk           | Participants were allocated using a clear process but 8 individuals originally assigned to CH were later assigned to GH                                                                                        |
| Was study free from selective outcome reporting?                            | Low risk           | All outcomes described in methods section were reported in results section plus 12-month data was used in Garasen 2008                                                                                         |
| Was study free from other risks of bias?                                    | Low risk           | Nothing obvious                                                                                                                                                                                                |

## Hospital-at-Home (HAH) interventions: heart failure

### Study: Patel 2008 pilot RCT - heart failure

| Bias                                                                        | Authors' judgement | Support for judgement                                                                                                                                       |
|-----------------------------------------------------------------------------|--------------------|-------------------------------------------------------------------------------------------------------------------------------------------------------------|
| Was allocation sequence adequately generated?                               | Low risk           | Open pilot RCT                                                                                                                                              |
| Was allocation adequately concealed?                                        | Unclear risk       | Used 'random number generator under direction of specialist nurse or hospital admission staff' but no further detail provided                               |
| Were baseline outcome measurements similar?                                 | Low risk           | Mostly not relevant since majority of outcomes were related to process                                                                                      |
| Were baseline characteristics similar?                                      | Low risk           | Baseline characteristics of intervention and control groups were reported and small differences seen in gender, education and two particular co-morbidities |
| Were incomplete outcome data adequately addressed?                          | High risk          | Flow of patients was described although description of analysis was lacking                                                                                 |
| Was knowledge of allocated interventions adequately prevented during study? | Unclear risk       | No detail provided                                                                                                                                          |
| Was study adequately protected against contamination?                       | Low risk           | Treatment and control were delivered in different locations                                                                                                 |
| Was study free from selective outcome reporting?                            | Unclear risk       | Difficult to understand the description of outcomes in methods section but all were reported in results section                                             |
| Was study free from other risks of bias?                                    | Unclear risk       | Description of analysis and results was possibly too assertive for a feasibility study                                                                      |

**Study: Mendoza 2009/Garcia-Soletto 2013 RCT - heart failure**

| Bias                                                                        | Authors' judgement | Support for judgement                                                                                                                                                                              |
|-----------------------------------------------------------------------------|--------------------|----------------------------------------------------------------------------------------------------------------------------------------------------------------------------------------------------|
| Was allocation sequence adequately generated?                               | Low risk           | 'Randomly assigned (1:1) to one of the intervention groups according to an externally generated sequence, which was hidden from the clinicians until the patient had given consent to participate' |
| Was allocation adequately concealed?                                        | Low risk           | As above                                                                                                                                                                                           |
| Were baseline outcome measurements similar?                                 | Low risk           | Mostly not relevant since outcomes were related to process but functional status and health-related QoL were similar                                                                               |
| Were baseline characteristics similar?                                      | Low risk           | Baseline characteristics of intervention and control groups were reported and similar                                                                                                              |
| Were incomplete outcome data adequately addressed?                          | Low risk           | Patient flow through trial was described and 'per protocol' analysis performed                                                                                                                     |
| Was knowledge of allocated interventions adequately prevented during study? | Unclear risk       | No detail provided                                                                                                                                                                                 |
| Was study adequately protected against contamination?                       | Low risk           | Treatment and control were delivered in different locations                                                                                                                                        |
| Was study free from selective outcome reporting?                            | Low risk           | All outcome measures described in methods section were reported in results section                                                                                                                 |
| Was study free from other risks of bias?                                    | Low risk           | Nothing obvious                                                                                                                                                                                    |

**Study: Tibaldi 2009 RCT - heart failure**

| Bias                                                                        | Authors' judgement | Support for judgement                                                                                                                                                                                                                                                                                                   |
|-----------------------------------------------------------------------------|--------------------|-------------------------------------------------------------------------------------------------------------------------------------------------------------------------------------------------------------------------------------------------------------------------------------------------------------------------|
| Was allocation sequence adequately generated?                               | Low risk           | 'By the use of a set of computer-generated random numbers in a 1:1 ratio. The allocation sequence was unknown to any of the investigators and was contained in a set of sealed envelopes, each bearing on the outside only the name of the hospital and a number, which was opened after the acceptance of the patient' |
| Was allocation adequately concealed?                                        | Low risk           | Participants were enrolled within 12-24 hours of ED admission by research assistants, masked to both allocation and hypotheses being tested                                                                                                                                                                             |
| Were baseline outcome measurements similar?                                 | Low risk           | Mostly not relevant since outcomes were related to process but depression, function and nutrition measures were similar                                                                                                                                                                                                 |
| Were baseline characteristics similar?                                      | Unclear risk       | Baseline characteristics of intervention and control groups were reported and heart rate was significantly different p=0.006                                                                                                                                                                                            |
| Were incomplete outcome data adequately addressed?                          | Low risk           | Patient flow through trial described and intention-to-treat analysis performed                                                                                                                                                                                                                                          |
| Was knowledge of allocated interventions adequately prevented during study? | Unclear risk       | No detail available                                                                                                                                                                                                                                                                                                     |
| Was study adequately protected against contamination?                       | Low risk           | Treatment and control were delivered in different locations                                                                                                                                                                                                                                                             |
| Was study free from selective outcome reporting?                            | Low risk           | All outcome measures described in methods section were reported in results section                                                                                                                                                                                                                                      |
| Was study free from other risks of bias?                                    | Low risk           | Nothing obvious                                                                                                                                                                                                                                                                                                         |

**Hospital-at-Home (HAH): COPD****Study: Ricauda 2008 RCT - COPD**

| Bias                                                                        | Authors' judgement | Support for judgement                                                                                                                                                                                                                                                                                             |
|-----------------------------------------------------------------------------|--------------------|-------------------------------------------------------------------------------------------------------------------------------------------------------------------------------------------------------------------------------------------------------------------------------------------------------------------|
| Was allocation sequence adequately generated?                               | Low risk           | Patients were randomised using a set of computer-generated random numbers in a 1:1 ratio.                                                                                                                                                                                                                         |
| Was allocation adequately concealed?                                        | Low risk           | Allocation sequence was unknown to any of the investigators and kept in a set of sealed envelopes, each bearing on the outside only the name of the hospital and a number. After acceptance of a patient, the ED nurse coordinator, who was not involved in the study, opened the appropriately numbered envelope |
| Were baseline outcome measurements similar?                                 | Low risk           | Mostly not relevant since outcomes were related to process but clinical outcomes e.g. depression were similar                                                                                                                                                                                                     |
| Were baseline characteristics similar?                                      | Low risk           | Recorded in DE table                                                                                                                                                                                                                                                                                              |
| Were incomplete outcome data adequately addressed?                          | Low risk           | Drop outs/loss-to-follow-up were recorded and intention-to-treat analysis performed                                                                                                                                                                                                                               |
| Was knowledge of allocated interventions adequately prevented during study? | Unclear risk       | Single-blind study since patients were aware of the treatment assignment although physicians and nurses evaluating patients were blinded to the patient's allocation                                                                                                                                              |
| Was study adequately protected against contamination?                       | Low risk           | Treatment and control were delivered in different locations                                                                                                                                                                                                                                                       |
| Was study free from selective outcome reporting?                            | Low risk           | All outcome measures described in methods section were reported in results section                                                                                                                                                                                                                                |
| Was study free from other risks of bias?                                    | Low risk           | Nothing obvious                                                                                                                                                                                                                                                                                                   |

## Hospital-at-Home (HAH): Pulmonary embolism

### Study: Rodriguez-Cerillo 2009 nRCT - non-massive pulmonary embolism

| Bias                                                                        | Authors' judgement | Support for judgement                                                                                                                                                         |
|-----------------------------------------------------------------------------|--------------------|-------------------------------------------------------------------------------------------------------------------------------------------------------------------------------|
| Was allocation sequence adequately generated?                               | High risk          | nRCT                                                                                                                                                                          |
| Was allocation adequately concealed?                                        | High risk          | nRCT                                                                                                                                                                          |
| Were baseline outcome measurements similar?                                 | Low risk           | Mostly not relevant since outcomes were related to process                                                                                                                    |
| Were baseline characteristics similar?                                      | Low risk           | Baseline characteristics of treatment and control groups were reported and only difference was prior thromboembolic disease, with these cases all being allocated to hospital |
| Were incomplete outcome data adequately addressed?                          | High risk          | No patient flow or analysis was described                                                                                                                                     |
| Was knowledge of allocated interventions adequately prevented during study? | High risk          | nRCT                                                                                                                                                                          |
| Was study adequately protected against contamination?                       | Low risk           | Clinical decision-making at study entry and any subsequent changes were recorded – although none made in practice                                                             |
| Was study free from selective outcome reporting?                            | Low risk           | All outcome measures described in methods section were reported in results section                                                                                            |
| Was study free from other risks of bias?                                    | High risk          | Reported some 'external' decision-making                                                                                                                                      |

## Hospital-at-Home (HAH): Pneumonia

### Study: Carratala 2005 open RCT - pneumonia

| Bias                                                                        | Authors' judgement | Support for judgement                                                                                                                                                                                                                                                                                                                                                                                       |
|-----------------------------------------------------------------------------|--------------------|-------------------------------------------------------------------------------------------------------------------------------------------------------------------------------------------------------------------------------------------------------------------------------------------------------------------------------------------------------------------------------------------------------------|
| Was allocation sequence adequately generated?                               | Low risk           | Randomisation was performed by using a computer-generated random code with a block size of 10                                                                                                                                                                                                                                                                                                               |
| Was allocation adequately concealed?                                        | Low risk           | Randomisation was stratified by hospital site, and the random code was held centrally, in a sealed envelope, by the clinical epidemiologist. In the emergency department, the infectious disease consultant (in most cases not a study investigator) opened sealed, sequentially numbered opaque envelopes to randomly assign patients who had provided written informed consent and met the study criteria |
| Were baseline outcome measurements similar?                                 | Low risk           | Mostly not relevant since outcomes were related to process                                                                                                                                                                                                                                                                                                                                                  |
| Were baseline characteristics similar?                                      | Low risk           | Detailed in DE table                                                                                                                                                                                                                                                                                                                                                                                        |
| Were incomplete outcome data adequately addressed?                          | Low risk           | Patient flow through trial was reported and intention-to-treat analysis performed                                                                                                                                                                                                                                                                                                                           |
| Was knowledge of allocated interventions adequately prevented during study? | Unclear risk       | Trial was described as 'unblinded'                                                                                                                                                                                                                                                                                                                                                                          |
| Was study adequately protected against contamination?                       | Low risk           | Treatment and control were delivered in different locations                                                                                                                                                                                                                                                                                                                                                 |
| Was study free from selective outcome reporting?                            | Low risk           | All outcome measures described in methods section were reported in results section                                                                                                                                                                                                                                                                                                                          |
| Was study free from other risks of bias?                                    | Unclear risk       | Lack of blinding in terms of assessment could be problematic                                                                                                                                                                                                                                                                                                                                                |

## Hospital-at-Home (HAH): Stroke

### Study: Kalra 2005 RCT - stroke

| Bias                                                                        | Authors' judgement | Support for judgement                                                                                                                                                                                                                       |
|-----------------------------------------------------------------------------|--------------------|---------------------------------------------------------------------------------------------------------------------------------------------------------------------------------------------------------------------------------------------|
| Was allocation sequence adequately generated?                               | Low risk           | Randomisation was not stratified and was undertaken using the block randomisation technique. This ensured that the number of patients allocated to the stroke unit or to domiciliary services at any one time did not exceed their capacity |
| Was allocation adequately concealed?                                        | Unclear risk       | Randomisation was conducted in blocks of 30 in an office remote from patient treatment areas, so that it would not be possible for those enrolling patients to guess allocation for the vast majority of subjects                           |
| Were baseline outcome measurements similar?                                 | Low risk           | Mostly not relevant since outcomes were related to process                                                                                                                                                                                  |
| Were baseline characteristics similar?                                      | Low risk           | Baseline characteristics with regard to stroke type, severity, level of impairment and initial disability were well-matched across the three groups                                                                                         |
| Were incomplete outcome data adequately addressed?                          | Low risk           | Patient flow through trial was reported and intention-to-treat analysis performed                                                                                                                                                           |
| Was knowledge of allocated interventions adequately prevented during study? | Unclear risk       | No detail provided                                                                                                                                                                                                                          |
| Was study adequately protected against contamination?                       | Unclear risk       | Patients were brought to hospital from domiciliary care if that was considered to be clinically appropriate                                                                                                                                 |
| Was study free from selective outcome reporting?                            | Low risk           | All outcome measures described in methods section were reported in results section                                                                                                                                                          |
| Was study free from other risks of bias?                                    | High risk          | In order to ensure that participants were treated in the most appropriate setting, swapping of groups was possible                                                                                                                          |

## Hospital-at-Home (HAH): Uncomplicated diverticulitis

### Study: Rodriguez-Cerrillo 2013 nRCT - uncomplicated diverticulitis

| Bias                                                                        | Authors' judgement | Support for judgement                                                              |
|-----------------------------------------------------------------------------|--------------------|------------------------------------------------------------------------------------|
| Was allocation sequence adequately generated?                               | High risk          | nRCT                                                                               |
| Was allocation adequately concealed?                                        | High risk          | As above                                                                           |
| Were baseline outcome measurements similar?                                 | Low risk           | Mostly not relevant since outcomes were related to process                         |
| Were baseline characteristics similar?                                      | Low risk           | Very limited details provided about age, gender and presenting complaint           |
| Were incomplete outcome data adequately addressed?                          | High risk          | No flow of patients was given and only basic analysis reported                     |
| Was knowledge of allocated interventions adequately prevented during study? | High risk          | No detail provided                                                                 |
| Was study adequately protected against contamination?                       | Low risk           | Treatment and control were delivered in different locations                        |
| Was study free from selective outcome reporting?                            | Low risk           | All outcome measures described in methods section were reported in results section |
| Was study free from other risks of bias?                                    | Unclear risk       | Both analysis and reporting of results were limited                                |

## Hospital-at-Home (HAH): Mixed population

### Study: Leff 2005/2009 'quasi experimental' - older population with mixed conditions

| Bias                                                                        | Authors' judgement | Support for judgement                                                                                                                                                                                                                                                                                                                                                                                                   |
|-----------------------------------------------------------------------------|--------------------|-------------------------------------------------------------------------------------------------------------------------------------------------------------------------------------------------------------------------------------------------------------------------------------------------------------------------------------------------------------------------------------------------------------------------|
| Was allocation sequence adequately generated?                               | High risk          | 'During the acute care hospital observation phase (1 November 1990 to 30 September 2001), eligible patients were identified and followed through usual hospital care.' During the intervention phase (1 November 2001 to 30 September 2002), eligible patients were identified at the time of admission and were offered the option of receiving their care in hospital-at-home rather than in the acute care hospital' |
| Was allocation adequately concealed?                                        | High risk          | As above                                                                                                                                                                                                                                                                                                                                                                                                                |
| Were baseline outcome measurements similar?                                 | Unclear risk       | No baseline measure of outcomes since they were related to receiving intervention e.g. time before evaluation                                                                                                                                                                                                                                                                                                           |
| Were baseline characteristics similar?                                      | High risk          | Populations differed in measures of poverty, living alone and medication. This was acknowledged but not adjusted for.                                                                                                                                                                                                                                                                                                   |
| Were incomplete outcome data adequately addressed?                          | Low risk           | Intention-to-treat analysis was conducted although there were substantial missing data e.g. in relation to functional status                                                                                                                                                                                                                                                                                            |
| Was knowledge of allocated interventions adequately prevented during study? | Low risk           | All outcomes were objective in Leff 2005 (main publication) but Leff 2009 used self-reported i.e. subjective daily activity of living as an outcome                                                                                                                                                                                                                                                                     |
| Was study adequately protected against contamination?                       | Low risk           | Unlikely that control group received intervention and vice versa. Rather, patients were allocated HaH or admitted and, if HaH was unacceptable they were admitted                                                                                                                                                                                                                                                       |
| Was study free from selective outcome reporting?                            | Low risk           | All outcomes described in methods section were reported in results section. Whilst there is no mention of activities of daily living in Leff 2005, this outcome was reported in Leff 2009                                                                                                                                                                                                                               |
| Was study free from other risks of bias?                                    | Unclear risk       | Possible selection bias related to differences in baseline characteristics e.g. functional status                                                                                                                                                                                                                                                                                                                       |

### Study: Lau 2003 historical controls

| Bias                                                                        | Authors' judgement | Support for judgement                                                                                                                                                                                                                                                                                                                                                  |
|-----------------------------------------------------------------------------|--------------------|------------------------------------------------------------------------------------------------------------------------------------------------------------------------------------------------------------------------------------------------------------------------------------------------------------------------------------------------------------------------|
| Was allocation sequence adequately generated?                               | High risk          | Control trial with historical control group                                                                                                                                                                                                                                                                                                                            |
| Was allocation adequately concealed?                                        | High risk          | As above                                                                                                                                                                                                                                                                                                                                                               |
| Were baseline outcome measurements similar?                                 | Unclear risk       | No baseline measure of outcomes since they were related to receiving intervention e.g. palliative care received                                                                                                                                                                                                                                                        |
| Were baseline characteristics similar?                                      | High risk?         | There was an imbalance in patient characteristics which may have been due to recruitment bias since the provider was responsible for recruiting patients into the trial. There were more dementia patients treated outside of hospital – although presumably their symptoms were 'fairly mild' since more pronounced behavioural problems were excluded from HaH group |
| Were incomplete outcome data adequately addressed?                          | Unclear risk       | No reference to missing data or how it might be handled                                                                                                                                                                                                                                                                                                                |
| Was knowledge of allocated interventions adequately prevented during study? | Low risk           | All outcomes were objective                                                                                                                                                                                                                                                                                                                                            |
| Was study adequately protected against contamination?                       | Low risk           | Unlikely that control group received intervention and vice versa. Rather, patients were allocated HaH or admitted and, if HaH was unacceptable they were admitted                                                                                                                                                                                                      |
| Was study free from selective outcome reporting?                            | Low risk           | All outcome measures described in methods section were reported in results section                                                                                                                                                                                                                                                                                     |
| Was study free from other risks of bias?                                    | Low risk           | Nothing obvious                                                                                                                                                                                                                                                                                                                                                        |

1  
2  
3  
4  
5  
6  
7  
8  
9  
10  
11  
12  
13  
14  
15  
16  
17  
18  
19  
20  
21  
22  
23  
24  
25  
26  
27  
28  
29  
30  
31  
32  
33  
34  
35  
36  
37  
38  
39  
40  
41  
42  
43  
44  
45  
46  
47

**Study name: Crilly 2010 'quasi experimental' - older population with mixed conditions**

| <b>Bias</b>                                                                 | <b>Authors' judgement</b> | <b>Support for judgement</b>                                                                                                                                                                                                                                                                                                         |
|-----------------------------------------------------------------------------|---------------------------|--------------------------------------------------------------------------------------------------------------------------------------------------------------------------------------------------------------------------------------------------------------------------------------------------------------------------------------|
| Was allocation sequence adequately generated?                               | High risk                 | Intervention group included 62 Aged Care Facility (ACF) residents who were enrolled in the Hospital in Nursing home programme during the first 12 months that the programme was operational, from 1 July 2003–30 June 2004. All sample members were ACF residents who presented to the ED and were subsequently admitted to hospital |
| Was allocation adequately concealed?                                        | High risk                 | As above                                                                                                                                                                                                                                                                                                                             |
| Were baseline outcome measurements similar?                                 | Unclear risk              | No baseline measure of outcomes since they were related to receiving intervention e.g. palliative care received                                                                                                                                                                                                                      |
| Were baseline characteristics similar?                                      | Low risk                  | Baseline characteristics of the study and control are reported and similar                                                                                                                                                                                                                                                           |
| Were incomplete outcome data adequately addressed?                          | Unclear                   | No reference to missing data or how it might be handled                                                                                                                                                                                                                                                                              |
| Was knowledge of allocated interventions adequately prevented during study? | Low risk                  | All outcomes were objective                                                                                                                                                                                                                                                                                                          |
| Was study adequately protected against contamination?                       | Low risk                  | Unlikely that control group received intervention and vice versa. Rather, patients were allocated HaH or admitted and, if HaH was unacceptable they were admitted                                                                                                                                                                    |
| Was study free from selective outcome reporting?                            | Low risk                  | All outcome measures described in methods section were reported in results section                                                                                                                                                                                                                                                   |
| Was study free from other risks of bias?                                    | Low risk                  | Nothing obvious                                                                                                                                                                                                                                                                                                                      |

For peer review only

## Appendix 3: AMSTAR ratings of systematic reviews

| Study                     | Was an 'a priori' design provided? | Was there duplicate study selection and data extraction? | Was a comprehensive literature search performed? | Was the status of publication (i.e. grey literature) used as an inclusion criterion? | Was a list of studies (included and excluded) provided? | Were the characteristics of the included studies provided?                      | Was the scientific quality of the included studies assessed and documented? | Was the scientific quality of the included studies used appropriately in formulating conclusions? | Were the methods used to combine the findings of studies appropriate?                                       | Was the likelihood of publication bias assessed? | Was the conflict of interest included? |
|---------------------------|------------------------------------|----------------------------------------------------------|--------------------------------------------------|--------------------------------------------------------------------------------------|---------------------------------------------------------|---------------------------------------------------------------------------------|-----------------------------------------------------------------------------|---------------------------------------------------------------------------------------------------|-------------------------------------------------------------------------------------------------------------|--------------------------------------------------|----------------------------------------|
| Caplan 2012               | YES                                | YES                                                      | YES                                              | YES                                                                                  | NO<br>excluded studies not listed                       | NO<br>studies were grouped by medical, surgical, rehabilitation and psychiatric | YES                                                                         | YES                                                                                               | YES                                                                                                         | YES                                              | YES                                    |
| Chalmers 2011             | YES                                | YES                                                      | YES                                              | NO                                                                                   | NO<br>excluded studies not listed                       | YES<br>but no ages and no direct reporting of participants in either group      | YES<br>but not detailed and whilst Cochrane was cited only one RCT involved | YES                                                                                               | UNCLEAR<br>difficult to judge whether combination of study types is commonly accepted                       | No                                               | YES                                    |
| Jeppensen 2012 (Cochrane) | YES                                | YES                                                      | YES                                              | YES                                                                                  | YES                                                     | YES                                                                             | YES                                                                         | YES                                                                                               | YES                                                                                                         | YES                                              | YES                                    |
| Qaddoura 2015             | YES                                | YES                                                      | YES                                              | YES                                                                                  | NO<br>excluded studies not listed                       | YES                                                                             | YES                                                                         | NO<br>relatively high risk of bias but all available data used                                    | NO<br>meta-analysis of two RCTs plus combination of different QoL measures from same study in meta-analysis | NO                                               | YES                                    |
| Shepperd 2016 (Cochrane)  | YES                                | YES                                                      | YES                                              | YES                                                                                  | YES                                                     | YES                                                                             | YES                                                                         | YES                                                                                               | YES                                                                                                         | YES                                              | YES                                    |
| Varney 2014               | YES                                | NO<br>used single reviewer                               | YES                                              | YES                                                                                  | NO                                                      | YES                                                                             | YES                                                                         | NO                                                                                                | N/A<br>no data were combined                                                                                | NO                                               | YES                                    |
| Vinson 2012               | YES                                | YES                                                      | YES                                              | YES                                                                                  | YES                                                     | YES                                                                             | YES                                                                         | YES                                                                                               | YES                                                                                                         | NO                                               | NO                                     |



1  
2  
3  
4  
5  
6  
7  
8  
9  
10  
11  
12  
13  
14  
15  
16  
17  
18  
19  
20  
21  
22  
23  
24  
25  
26  
27  
28  
29  
30  
31  
32  
33  
34  
35  
36  
37  
38  
39  
40  
41  
42  
43  
44  
45  
46  
47  
48  
49  
50  
51  
52  
53  
54  
55  
56  
57  
58  
59  
60

#### Appendix 4: description of interventions included in systematic review

| Intervention                                                                  | Description                                                                                                                                                                                                                                                                                                                                                                                                                                                                                                                                     |
|-------------------------------------------------------------------------------|-------------------------------------------------------------------------------------------------------------------------------------------------------------------------------------------------------------------------------------------------------------------------------------------------------------------------------------------------------------------------------------------------------------------------------------------------------------------------------------------------------------------------------------------------|
| Paramedic practitioner (PP) / emergency care practitioner (ECP) interventions | PPs/ECPs can be trained to 'assess and treat' or to refer patients with a range of conditions, as part of pre-hospital care. These roles were created in order to provide a more appropriate response to patients needs in emergency and urgent care settings. Their main purpose is to improve the pathway of care and patient experience, particularly by discharging patients at the scene or by referring on to the most appropriate care practitioner, reducing unnecessary emergency department (ED) attendance and avoidable admissions. |
| Community hospital (CH) interventions                                         | The role of CHs varies between country and health systems but, essentially, their main role is to provide non-urgent i.e. routine or rehabilitative care. However, their role can be extended to provide an alternative to acute hospital (AH) admission for appropriate cases.                                                                                                                                                                                                                                                                 |
| Emergency department (ED) interventions                                       | These involve initial assessment in the ED, followed by an extended stay for tests and observation. This extended stay is in a bed closely associated with the ED, if not part of it.                                                                                                                                                                                                                                                                                                                                                           |
| Hospital-at-home (HaH) interventions                                          | HaH services provide acute or sub-acute treatment in a patient's residence for a condition that would normally require admission to hospital. It is also known as 'hospital in the home' and 'home hospitalisation'.                                                                                                                                                                                                                                                                                                                            |
| Hospital in nursing/care home (HNCH) interventions                            | HNCH is as a model of admission avoidance to treat patients living in nursing and residential care homes, working on the same principles as HaH for community-dwelling residents.                                                                                                                                                                                                                                                                                                                                                               |



## Paramedic/ECP interventions (n=3)

| Author<br>Year<br>Country | Study                                                                                                                                                                                         | Participants                                                                                                                                                                                                                                                                                                                                                                                                                                                                                                                                                                                                                                                                                                                                                                                                                                                 | Intervention                                                                                                                                                                                                                                                                                                                                                                                                                                                                                                                                                                                                                                                                                                                                                                                                                                                                                                                                                                                                                                                                                                                                                                                                                                                             | Control                                                                                                                                                                                                           | Outcomes assessed                                                                                                                                                                                                                                                                                                                                                                     | Results                                                                                                                                                                                                                                                                                                                                                                                                                                                                                                                                                                                                                                                          |
|---------------------------|-----------------------------------------------------------------------------------------------------------------------------------------------------------------------------------------------|--------------------------------------------------------------------------------------------------------------------------------------------------------------------------------------------------------------------------------------------------------------------------------------------------------------------------------------------------------------------------------------------------------------------------------------------------------------------------------------------------------------------------------------------------------------------------------------------------------------------------------------------------------------------------------------------------------------------------------------------------------------------------------------------------------------------------------------------------------------|--------------------------------------------------------------------------------------------------------------------------------------------------------------------------------------------------------------------------------------------------------------------------------------------------------------------------------------------------------------------------------------------------------------------------------------------------------------------------------------------------------------------------------------------------------------------------------------------------------------------------------------------------------------------------------------------------------------------------------------------------------------------------------------------------------------------------------------------------------------------------------------------------------------------------------------------------------------------------------------------------------------------------------------------------------------------------------------------------------------------------------------------------------------------------------------------------------------------------------------------------------------------------|-------------------------------------------------------------------------------------------------------------------------------------------------------------------------------------------------------------------|---------------------------------------------------------------------------------------------------------------------------------------------------------------------------------------------------------------------------------------------------------------------------------------------------------------------------------------------------------------------------------------|------------------------------------------------------------------------------------------------------------------------------------------------------------------------------------------------------------------------------------------------------------------------------------------------------------------------------------------------------------------------------------------------------------------------------------------------------------------------------------------------------------------------------------------------------------------------------------------------------------------------------------------------------------------|
| Mason<br>2007<br>UK       | Cluster RCT by service<br><br>56 clusters<br><br><b>Intervention:</b><br>paramedic practitioner service<br>n=1469<br><br><b>Control:</b><br>Inactive paramedic practitioner service<br>n=1549 | <b>Inclusion criteria:</b><br>Patients aged ≥60yrs recruited from 1 Sep 2003- 26 Sep 2004. Call originated from a Sheffield postcode between 8am-8pm, with a presenting complaint that fell within the scope of practice of the paramedic practitioners.<br><br><b>Exclusion criteria:</b><br><b>None given</b><br><br>'If patients were unable to complete questionnaires e.g. because of cognitive impairment or who were unable to read English—we obtained consent for follow-up by review of clinical records only.<br><br><b>Baseline characteristics of participants</b><br>Intervention vs. control<br><b>Mean age (SD)</b><br>82.6(8.3) vs. 82.5(8.3) yrs<br><b>Women %</b><br>72 vs.73%<br><b>Living in on own home %</b><br>78vs.78 %<br><b>Presenting complaint %</b><br>Fall 88 vs.89%<br>Haemorrhage 6 vs.5%<br>Acute medical condition 6vs.5% | A paramedic practitioner based in the ambulance control room identified eligible calls by the presenting complaint and notified a paramedic practitioner. All identified patients were approached face to face either in the community or in ED for written consent to follow-up. Patients who had more than one eligible episode were recruited only once. The research team independently checked the ambulance service call database at the end of each month for any additional eligible calls not identified. These were checked for selection bias but not followed up. Scope of practice of paramedic practitioners: Falls, Lacerations, Epistaxis, Minor burns, Foreign body in ear, nose, or throat, Local anaesthetic techniques, Wound care and suturing techniques, Principles of dressings and splintage, Joint examination, Examination of neurological, cardiovascular, and respiratory system, Examination of ear, nose, and throat, Protocol led dispensing: simple analgesia, antibiotics, tetanus toxoid, Assessment of mobility and social needs, Additional options for referral and requesting investigations, Requests for radiography, Referral processes: emergency department, general practitioner, district nurse, community social services | A paramedic practitioner based in the ambulance control room identified eligible calls by the presenting complaint and notified a paramedic practitioner in the ED<br><br>Procedure continued as for intervention | <b>Relevant measures &amp; outcomes</b><br><br>Primary outcomes<br><br><b>ED attendance</b><br><b>Hospital admissions within 28 days</b><br><b>Time of call to time of discharge</b><br><b>Patient satisfaction survey including the EQ-5D</b><br><br>Secondary outcomes<br><br><b>Subsequent unplanned contact with secondary care at 28 days</b><br><br><b>Mortality at 28 days</b> | Intervention vs. control<br><br>Primary outcomes<br><b>ED attendance (28 days)</b><br>970 (62.6%) vs. 1286 (87.5%)<br>p<0.001<br><br><b>Hospital admissions (28 days)</b><br>626 (40.4%) vs. 683 (46.5%)<br>p<0.001<br><br><b>Mean Time of call (SD) to time of discharge in mins</b><br>235.1(183.3) vs. 277.8(182.6)<br>p<0.001<br><br><b>Patient satisfaction survey including the EQ-5D</b><br>Very satisfied with care 656 (85.5%)vs.528 (73.8%)<br>p<0.001<br><br>Secondary outcomes<br><br><b>Subsequent unplanned contact with secondary care</b><br>330(21.3%) vs. 259 (17.6%)<br>p<0.01<br><br><b>Mortality at 28days</b><br>68(4.4%) vs.74(5%) p=0.41 |

| Author<br>Year<br>Country                                                                             | Study                                                                                                                                                                                  | Participants                                                                                                                                                                                                                                                                                                                                              | Intervention                                                                                                                                                                                                                                                                                                                                      | Control                                                                                                                                                                                                                                                                                                                                                                                                                                                                                                  | Outcomes assessed                                                                                                                                                                                                                                                        | Results                                                                                                                                                                                                                                                                                                                                                                                                                                                                |
|-------------------------------------------------------------------------------------------------------|----------------------------------------------------------------------------------------------------------------------------------------------------------------------------------------|-----------------------------------------------------------------------------------------------------------------------------------------------------------------------------------------------------------------------------------------------------------------------------------------------------------------------------------------------------------|---------------------------------------------------------------------------------------------------------------------------------------------------------------------------------------------------------------------------------------------------------------------------------------------------------------------------------------------------|----------------------------------------------------------------------------------------------------------------------------------------------------------------------------------------------------------------------------------------------------------------------------------------------------------------------------------------------------------------------------------------------------------------------------------------------------------------------------------------------------------|--------------------------------------------------------------------------------------------------------------------------------------------------------------------------------------------------------------------------------------------------------------------------|------------------------------------------------------------------------------------------------------------------------------------------------------------------------------------------------------------------------------------------------------------------------------------------------------------------------------------------------------------------------------------------------------------------------------------------------------------------------|
| 1<br>2<br>3<br>4<br>5<br>6<br>7<br>8<br>9<br>10<br>11<br>12<br>13<br>14<br>15<br>16<br>17<br>18<br>19 | Gray<br>2008<br>UK<br><br><b>Intervention:</b><br>Emergency care<br>practitioner (ECP)<br>intervention<br>n=233<br><br><b>Control:</b><br>Historical control group<br>from ED<br>n=772 | The study included two groups of patients a) those with breathing difficulties & b) elderly patients >65yrs with a fall. The latter only is reported here.<br><br><b>Inclusion criteria:</b><br>Elderly patients >65yrs with a fall.<br><b>Exclusion criteria:</b><br>None given<br><br><b>Baseline characteristics of participants</b><br><br>None given | <b>Outline of intervention</b><br><br>Jan-April 2006 inclusive, all the patients seen by the ECP service who had rung 999 and were an elderly patient (>65yrs) with a fall were reviewed. Each patient seen by an ECP was searched for in the hospital records for ED attendance or admissions in 72 h and 28 days following attendance by an ECP | <b>Outline of control</b><br>Comparison data taken Jan- April 2005 inclusive for attendances to same ED for patients with the same criteria as above & seen by non-ECP ambulance service personnel. These dates were chosen because, during this time, the ECP service was not tasked to patients with breathing difficulties and Yorkshire Ambulance Service had only 12 operational ECPs during this comparison period compared with 24 whole-time equivalent operational ECPs during the study period | <b>Relevant measures &amp; outcomes</b><br><br>Outcome on initial contact:<br><br><b>Treated at and stayed home</b><br><br><b>ED and or admitted</b><br><br>At 72hrs & 28 days<br><b>At home</b><br><b>ED attendance</b><br><b>Admission</b><br><br><b>Costs</b><br>None | <b>ECP vs. ED</b><br><br>Outcome on initial contact:<br><b>Stayed at home (PC referral)/went home</b><br>171 vs. 369<br>(73% vs. 48% avoidable admission rate)<br><br><b>At 72hr:</b><br>21/171 (intervention grp) attended ED and or were admitted<br><br><b>At 28 days:</b><br>A further 19 (intervention grp) attended ED and or were admitted<br><br>Avoidable admission rate (intervention grp) at 28 days was 56% ( 17% better) compared to control group p<0.05 |

| Author<br>Year<br>Country | Study                                                                                                                                                                                      | Participants                                                                                                                                                                                                                                                                                                                                                                                                                                                                                                                                                                                                                                                                                                                                                | Intervention                             | Control                             | Outcomes assessed                                                                                                                                                                                                                                                                                                                                                                                                                                                                                                | Results                                                                                                                                                                                                                                                                                                                                                                                                                                                                                              |
|---------------------------|--------------------------------------------------------------------------------------------------------------------------------------------------------------------------------------------|-------------------------------------------------------------------------------------------------------------------------------------------------------------------------------------------------------------------------------------------------------------------------------------------------------------------------------------------------------------------------------------------------------------------------------------------------------------------------------------------------------------------------------------------------------------------------------------------------------------------------------------------------------------------------------------------------------------------------------------------------------------|------------------------------------------|-------------------------------------|------------------------------------------------------------------------------------------------------------------------------------------------------------------------------------------------------------------------------------------------------------------------------------------------------------------------------------------------------------------------------------------------------------------------------------------------------------------------------------------------------------------|------------------------------------------------------------------------------------------------------------------------------------------------------------------------------------------------------------------------------------------------------------------------------------------------------------------------------------------------------------------------------------------------------------------------------------------------------------------------------------------------------|
| Mason<br>2012<br>UK       | COS<br><br><b>Intervention:</b><br>Five teams of Emergency Care Practitioners (ECP) n= 256 for care home cohort<br><b>Control:</b><br>Five usual care providers n=201 for care home cohort | <b>Inclusion criteria:</b><br>Informed consent was obtained from all study participants prior to recruitment. Within each pair of services all patients presenting with emergency or urgent complaints that were eligible to be seen by ECPs and presented to either the intervention or the control services between May 2006 and August 2007 were included in the trial.<br><b>Exclusion criteria:</b><br>No detail<br><br><b>Baseline characteristics of participants</b><br>(no stats given)<br>Care home cohort<br>Intervention vs. control<br><b>Mean age</b><br>83.5(10.40 vs. 84.5(8.5) yrs<br><br><b>% Female</b><br>68 vs.66%<br><br><b>Clinical complaint %</b><br>Adult medical 30 vs.41 %<br>Adult trauma 46 vs.13 %<br>Elderly falls 23vs.46% | Outline of intervention<br><br>No detail | Outline of control<br><br>No detail | Relevant measures & outcomes<br><br>Using paired services<br><br>Primary outcomes<br><br><b>% of patients Discharged following consultation with no further follow up by any health professional</b><br><br><b>Urgently referred to hospital (both ED or direct admission)</b><br><br><b>Non-urgently referred to GP or community care</b><br><br><b>Non-urgently referred to GP or community care</b><br><br>Secondary outcomes (relevant ones only)<br><br><b>Episode time from first contact to discharge</b> | <b>Discharged with no further follow up by any health professional</b><br>49.2 vs.12.4%<br>MD 36.8% (95% CI 26.7,46.8)<br><br><b>Urgently referred to hospital (both ED or direct admission)</b><br>22.7 vs. 87.6%<br>MD -64.9% (95% CI -71.8 ,-,58.0)<br><br><b>Non-urgently referred to GP or community care</b><br>28.1vs. 0%<br>28.1% (22.6,33.7)<br><br><b>Episode time from first contact to discharge median in mins (IQR)</b><br>60 (40,80) vs. 39 (29,58)<br>Time ratio<br>1.36 (1.24,1.49) |

| Author<br>Year<br>Country | Study                                                                                                                                           | Participants                                                                                                                                                                                                                                                                                                                                                                                                                                                                                                                                                                                                                                                                                                                                                                                                                                                                                                                                                                                                                                                                                                                                                                                                                                         | Intervention                                                                                                                                                                                                                                                                                                                                                                                                                                                                                                                                                                                                                                                                                                                                                                                                                                                                                                                                                                                                                                                                                                                                                                                | Control                                                                                                                                                                                                                                       | Outcomes assessed                                                                                                                                                                                                                                                                                                                   | Results                                                                                                                                                                                                                                                                                                                                                                                                                                                                                                                                                                                                                                                                                                                                                                                                                                                                                               |
|---------------------------|-------------------------------------------------------------------------------------------------------------------------------------------------|------------------------------------------------------------------------------------------------------------------------------------------------------------------------------------------------------------------------------------------------------------------------------------------------------------------------------------------------------------------------------------------------------------------------------------------------------------------------------------------------------------------------------------------------------------------------------------------------------------------------------------------------------------------------------------------------------------------------------------------------------------------------------------------------------------------------------------------------------------------------------------------------------------------------------------------------------------------------------------------------------------------------------------------------------------------------------------------------------------------------------------------------------------------------------------------------------------------------------------------------------|---------------------------------------------------------------------------------------------------------------------------------------------------------------------------------------------------------------------------------------------------------------------------------------------------------------------------------------------------------------------------------------------------------------------------------------------------------------------------------------------------------------------------------------------------------------------------------------------------------------------------------------------------------------------------------------------------------------------------------------------------------------------------------------------------------------------------------------------------------------------------------------------------------------------------------------------------------------------------------------------------------------------------------------------------------------------------------------------------------------------------------------------------------------------------------------------|-----------------------------------------------------------------------------------------------------------------------------------------------------------------------------------------------------------------------------------------------|-------------------------------------------------------------------------------------------------------------------------------------------------------------------------------------------------------------------------------------------------------------------------------------------------------------------------------------|-------------------------------------------------------------------------------------------------------------------------------------------------------------------------------------------------------------------------------------------------------------------------------------------------------------------------------------------------------------------------------------------------------------------------------------------------------------------------------------------------------------------------------------------------------------------------------------------------------------------------------------------------------------------------------------------------------------------------------------------------------------------------------------------------------------------------------------------------------------------------------------------------------|
| Sun<br>2014<br>USA        | <b>RCT</b><br><br><b>Intervention:</b><br>ED observation syncope protocol<br>n=62<br><br><b>Control:</b><br>Normal In-patient admission<br>n=62 | <b>Inclusion criteria:</b><br>Patients aged ≥ 50 years or older diagnosed with intermediate syncope.<br><br><b>Exclusion criteria</b><br>Patients with a serious condition: symptomatic arrhythmias, myocardial infarction, pulmonary embolism, acute pulmonary edema, stroke, severe anaemia or blood loss requiring blood transfusion, sepsis, and major traumatic injury.<br>Also: seizure, head trauma, or intoxication as reason for loss of consciousness; new/ baseline cognitive impairment; do-not-resuscitate or do-not-intubate status; active chemotherapy and inability to speak either English/Spanish. Met high risk criteria.<br><br><b>Baseline characteristics of participants</b><br>Observation vs. control<br>Mean(SD) or%<br><b>Mean age</b><br>65 (11) vs. 64(11)<br><b>% Female</b><br>53 vs. 48<br><b>Syncope index complaint (vs near syncope)</b><br>74vs. 61%<br><b>Congestive heart failure</b><br>2vs. 3%<br><b>Coronary artery disease</b><br>13vs.8%<br><b>Arrhythmia</b> 8vs.6%<br><b>Syncope in previous yr</b><br>16vs.21%<br><b>Quality of well-being scale</b><br>0.55(0.15) vs. 0.55(0.14)<br><b>Syncope functional status</b><br>29((25) vs.25(26)<br><b>Syncope risk score</b><br>0.76 (0.840 vs.0.76 (0.67) | <b>Outline of intervention</b><br>Patients received continuous cardiac monitoring ≥ 12hrs. ≤2 serial cardiac troponin tests approx. 6 hours apart to exclude acute MI. Rest echocardiogram for patients with cardiac murmur, if not performed in previous 6mths. Additional testing as required. Maximum stay in observation unit could not be more than 24hrs. Observation protocol patients who received a diagnosis detailed in exclusion list or had pending tests at 24hrs were admitted<br><br><b>High Risk Criteria</b><br>Serious condition identified in the ED, History of ventricular arrhythmia, Cardiac device with dysfunction, Exertional syncope, Presentation concerning for acute coronary syndrome, Severe cardiac valve disease (e.g., aortic stenosis <1 cm2), Known cardiac ejection fraction <40%<br><b>Intermediate Risk Criteria</b> No high risk features <b>AND</b> No low risk features <b>AND</b> Clinical judgment by emergency physician that patient requires further diagnostic evaluation<br><br><b>Low Risk</b> Symptoms consistent with orthostatic or vasovagal syncope, Emergency physician judgment that no further diagnostic evaluation is needed. | <b>Outline of control</b><br>The syncope protocol was not used. Contamination between groups was minimized by being managed in distinct physical spaces by different clinical services.<br><br><b>Intervention delivered by:</b><br>No detail | <b>Relevant measures &amp; outcomes</b><br><br>Primary outcomes<br><b>Inpatient admission rates</b><br><b>Hospital LOS at indexed visit</b><br><br>Secondary outcomes<br><b>30 day and 6mth serious events</b><br><br><b>Index and 30 day hospital costs</b><br><b>30 days changes in QoL</b><br><b>30 day patient satisfaction</b> | <b>Observation vs. s care</b><br><b>Inpatient admission rates</b><br><b>9 (15%) vs. 57 (92%)</b><br><b>Relative rate 0.16 (95%CI 0.09,0.29, p&lt;0.001)</b><br><b>Hospital LOS at indexed visit mean SD (hrs) 29 (15) vs. 47hrs (34) (p&lt;0.001)</b><br><b>Serious events</b><br><b>During hospital visit</b><br>Death 0 vs. 0<br>Arrhythmia 2 vs. 2<br>Pacemaker insertion 1vs.1<br>Syncope with bone fracture 2 vs.1<br>30 days recurrent syncope 1 vs 1<br>30 day serious outcomes after discharge 2 vs. 0<br>6mth serious outcomes after hospital discharge 4 vs.5<br><b>Costs \$ (SD)</b><br>At index visit 1,400(1,220) vs.2,420(3,930)<br>Within 30 days 1,800(2,150) vs.2,520(3,980)<br><b>Change in quality of life</b> mean SD<br>0 (0.2) vs. 0.03 (0.18)<br><b>Change in syncope functional status</b><br>-7.6(20.1) vs.-2.4(26.3)<br><b>Patient satisfaction</b><br>8.9(1.40 vs.9.3(0.9) |

| Author<br>Year<br>Country                                                                                                                                                                                               | Study                                                                                                                                                                     | Participants                                                                                                                                                                                                                                                                                                                                                                                                                                                                                                                                                                                                                                                                                                                                                                                                                                                                                                                                                                                                                                                                                 | Intervention                                                                                                                                                                                                                                                                                                                                                                                                                                                                                                                                                                                                                                                                                                                                                                                                                                                                                                                                                                                                                                                                                                                                                                                                            | Control                                                                                                                                                                                                                         | Outcomes assessed                                                                                                                                                                                                                                                                                                                                                                                                                                                                                                                                                                                                                                             | Results                                                                                                                                                                                                                                                                                                                                                                                                                                                                                                                                                                                                                                                                                                                                                                                                                                                                                                          |
|-------------------------------------------------------------------------------------------------------------------------------------------------------------------------------------------------------------------------|---------------------------------------------------------------------------------------------------------------------------------------------------------------------------|----------------------------------------------------------------------------------------------------------------------------------------------------------------------------------------------------------------------------------------------------------------------------------------------------------------------------------------------------------------------------------------------------------------------------------------------------------------------------------------------------------------------------------------------------------------------------------------------------------------------------------------------------------------------------------------------------------------------------------------------------------------------------------------------------------------------------------------------------------------------------------------------------------------------------------------------------------------------------------------------------------------------------------------------------------------------------------------------|-------------------------------------------------------------------------------------------------------------------------------------------------------------------------------------------------------------------------------------------------------------------------------------------------------------------------------------------------------------------------------------------------------------------------------------------------------------------------------------------------------------------------------------------------------------------------------------------------------------------------------------------------------------------------------------------------------------------------------------------------------------------------------------------------------------------------------------------------------------------------------------------------------------------------------------------------------------------------------------------------------------------------------------------------------------------------------------------------------------------------------------------------------------------------------------------------------------------------|---------------------------------------------------------------------------------------------------------------------------------------------------------------------------------------------------------------------------------|---------------------------------------------------------------------------------------------------------------------------------------------------------------------------------------------------------------------------------------------------------------------------------------------------------------------------------------------------------------------------------------------------------------------------------------------------------------------------------------------------------------------------------------------------------------------------------------------------------------------------------------------------------------|------------------------------------------------------------------------------------------------------------------------------------------------------------------------------------------------------------------------------------------------------------------------------------------------------------------------------------------------------------------------------------------------------------------------------------------------------------------------------------------------------------------------------------------------------------------------------------------------------------------------------------------------------------------------------------------------------------------------------------------------------------------------------------------------------------------------------------------------------------------------------------------------------------------|
| 1<br>2<br>3<br>4<br>5<br>6<br>7<br>8<br>9<br>10<br>11<br>12<br>13<br>14<br>15<br>16<br>17<br>18<br>19<br>20<br>21<br>22<br>23<br>24<br>25<br>26<br>27<br>28<br>29<br>30<br>31<br>32<br>33<br>34<br>35<br>36<br>37<br>38 | <p>Benaiges<br/>2014<br/>Spain</p> <p><b>Intervention:</b><br/>'Day hospital' (DH)<br/>n=64</p> <p><b>Control:</b><br/>Conventional<br/>hospitalisation (CH)<br/>n=36</p> | <p><b>Inclusion criteria:</b></p> <p>Patients with sustained hyperglycemia (&gt;300 mg/dL) for at least 3 days with or without ketosis</p> <p><b>Exclusion criteria</b></p> <p>Ketoacidosis (venous pH &lt;7.31 and/or HCO<sub>3</sub> &lt;22 mEq), hyperosmolar crisis (glycemia &gt;600 mg/dL and effective plasma osmolarity &gt;320 mOsm/L), unstable hemodynamic status or need for ventilatory support, severe precipitating factors such as acute myocardial infarction, stroke, sepsis, social deprivation, and dependence for four or more activities of daily living (Katz index &gt;D).</p> <p><b>Baseline characteristics of participants (Stats shown if signif)</b><br/>DH vs.CH</p> <p><b>Age</b><br/>80.3(4.8)vs. 80.6(4.6)yrs</p> <p><b>Female</b><br/>67 vs. 56%</p> <p><b>BMI</b><br/>26.1(4.9)vs.25.5(5.1)</p> <p><b>Katz A&amp;B</b><br/>72.2vs.72.2%</p> <p><b>Charlson Index</b><br/>3.2(2.0)vs. 3.3(1.7)</p> <p><b>Family support</b><br/>88.1 vs.97.1%</p> <p><b>Diabetes duration</b><br/>14.4 (8.0) vs. 97.1 yrs</p> <p>Plus other specific diabetes measures</p> | <p><b>Outline of intervention</b></p> <p>Patients assigned to DH if admitted to hospital within DH opening hours (week days 8 am -4 pm); otherwise they were treated in ED and subsequently hospitalized.</p> <p>After initial treatment of hyperglycemic crisis DH patients were scheduled for follow-up visits at 24, 72 hours, and 7 days to adjust treatment and to complete their diabetes education</p> <p>Patients were treated with same protocol for both DH and CH: this included initial evaluation with a blood test, urinalysis, chest radiograph to rule out underlying infectious disease, and hourly measurement of glycemia and ketonemia.</p> <p>Treatment included hydration as required, an insulin regimen with insulin, and oral carbohydrate intake if glucose levels were less than 250 mg/dL with persistent ketosis. If infection was diagnosed, treatment was initiated.</p> <p>Diabetes education was delivered by specialist diabetes nurse with specific attention paid to dietary advice, physical activity, and recognition of hypoglycemia.</p> <p>Measurement of glycated hemoglobin (HbA1c) and clinical evaluation was scheduled for 3 &amp; 6 mths for patients in both groups</p> | <p><b>Outline of control</b></p> <p>At hospital discharge, CH patients were scheduled for a one-week follow-up visit in outpatient clinic.</p> <p><b>Intervention delivered by:</b><br/>Unclear but normal outpatient staff</p> | <p><b>Relevant measures &amp; outcomes</b><br/>(no distinguishing between primary and secondary outcomes )</p> <p>At 3 mth follow up</p> <p><b>[No. of mild or severe hypoglycemic episodes ]</b></p> <p><b>Readmissions for diabetes or unrelated cause</b></p> <p><b>[Nosocomial complications ]</b></p> <p><b>No. of outpatient visits</b></p> <p><b>No. of ER visits</b></p> <p>[outcomes] not detailed as not relevant to our question</p> <p><b>Costs</b></p> <p><b>Initial care</b></p> <p><b>Complementary examinations</b></p> <p><b>Pharmacy</b></p> <p><b>Outpatient visits</b></p> <p><b>Readmissions</b></p> <p><b>Total</b></p> <p>In euros</p> | <p>Mean (SD)<br/>DH vs.CH</p> <p><b>Readmissions for diabetes (%)</b><br/><b>1(1.6)vs. 5 (13.9)</b><br/><b>P=0.04</b></p> <p>Readmission for any cause (%)<br/>4(6.3)vs.7(19.4) p=0.085</p> <p><b>No. of outpatient visits (SE?)</b><br/><b>5.0(2.2)vs. 2.5(2.0)</b><br/><b>p=0.012</b></p> <p>No. of ER visits (SE?)<br/>0.2(0.6)vs.0.2(0.4)<br/>P=0.59</p> <p><b>Costs</b></p> <p><b>Initial care</b><br/><b>580.2(489.1) vs.</b><br/><b>2,013.6(790.4) p&lt;0.001</b></p> <p><b>Complementary examinations</b><br/><b>123.7(276.3) vs. 281.3(188.1)</b><br/><b>p=0.007</b></p> <p>Pharmacy<br/>12.8(95.6)vs. 20.3(24.8)<br/>P=0.676</p> <p>Outpatient visits<br/><b>116.7(75.3) vs. 56.9(105.7)</b><br/><b>p=0.003</b></p> <p><b>Readmissions (total)</b><br/><b>340.8(1190)vs.288.3(916.8)p=</b><br/><b>0.835</b></p> <p><b>Total</b><br/><b>1,345.1(793.6) vs.</b><br/><b>2,212.4(982.5) p&lt;0.001</b></p> |

| Author<br>Year<br>Country                                                                                                                             | Study                  | Participants                                                                                                                                                                                                                                                                                                                                                                                                                                                                                                                                                                                                                                                                                                                                                                                                                                                                                                                                                                                                                                                                                                                                                                    | Intervention                                                                                                                                           | Control                                                                                                                                                                                                                                                                                                                                                                                                                 | Outcomes assessed                                                                                                                                                                                                                                                                                                                                                                                                                                                                                                                    | Results                                                                                                                                                                                                                                                                                                                                                                                                                                                                                                                                                                                                                                                                                                                                                                                                                  |
|-------------------------------------------------------------------------------------------------------------------------------------------------------|------------------------|---------------------------------------------------------------------------------------------------------------------------------------------------------------------------------------------------------------------------------------------------------------------------------------------------------------------------------------------------------------------------------------------------------------------------------------------------------------------------------------------------------------------------------------------------------------------------------------------------------------------------------------------------------------------------------------------------------------------------------------------------------------------------------------------------------------------------------------------------------------------------------------------------------------------------------------------------------------------------------------------------------------------------------------------------------------------------------------------------------------------------------------------------------------------------------|--------------------------------------------------------------------------------------------------------------------------------------------------------|-------------------------------------------------------------------------------------------------------------------------------------------------------------------------------------------------------------------------------------------------------------------------------------------------------------------------------------------------------------------------------------------------------------------------|--------------------------------------------------------------------------------------------------------------------------------------------------------------------------------------------------------------------------------------------------------------------------------------------------------------------------------------------------------------------------------------------------------------------------------------------------------------------------------------------------------------------------------------|--------------------------------------------------------------------------------------------------------------------------------------------------------------------------------------------------------------------------------------------------------------------------------------------------------------------------------------------------------------------------------------------------------------------------------------------------------------------------------------------------------------------------------------------------------------------------------------------------------------------------------------------------------------------------------------------------------------------------------------------------------------------------------------------------------------------------|
| 1<br>2<br>3<br>4<br>5<br>6<br>7<br>8<br>9<br>10<br>11<br>12<br>13<br>14<br>15<br>16<br>17<br>18<br>19<br>20<br>21<br>22<br>23<br>24<br>25<br>26<br>27 | Salvi<br>2008<br>Italy | <p><b>COS (secondary analysis)</b></p> <p><b>Intervention:</b><br/>Geriatric ED (GED)<br/>n=100</p> <p><b>Control:</b><br/>Conventional ED (CED)<br/>n=100</p> <p><b>Inclusion criteria:</b><br/>Patients aged <math>\geq 65</math> yrs were enrolled in June 2006 from the GED and July 2006 from the CED taking care that none presenting to the ED in the course of the study period was recruited again.</p> <p><b>Exclusion criteria</b><br/>Cognitive impairment (a score of <math>\geq 5</math> on the Short Portable Mental Status Questionnaire SPMSQ) and no proxy,<br/>Those too ill to respond, Trauma patients</p> <p><b>Baseline characteristics of participants</b><br/>CED vs GED<br/>Mean(SD)<br/><b>Age 78.1(7) vs. 82.5(7.20) p&lt;0.001</b><br/><b>Female 47 vs. 68% p&lt;0.001</b><br/><b>Married 70 vs. 40% p&lt;0.001</b><br/>Living alone 12 vs 14<br/><b>Triage code</b><br/>Urgent/semi-urgent (2/3)<br/>97 vs.90 %<br/>Charlson Index 3.3(2.3) vs. 3.4(1.7)<br/><b>SPMSQ</b><br/><b>2.5(3.3) vs. 5.2(4.2) p&lt;0.001</b><br/><b>ADL4.3(2) vs. 3.2(2.5)</b><br/><b>P=0.001</b></p> <p>No differences in profile of diagnosis in ED between groups</p> | <p><b>Outline of intervention</b><br/>No details beyond ED plus observation unit of 6 beds</p> <p><b>Intervention delivered by:</b><br/>No details</p> | <p><b>Outline of control</b><br/>Patients presenting to ED were screened Mon-Fri 9am- 6pm using standard information sheet.<br/>Interviews conducted with patients or family member/other for patients with cognitive impairment. Written consent &amp; access to medical records was obtained. patients a underwent a brief geriatric assessment using the Charlson Index, SPMSQ, and ADL before the current event</p> | <p><b>Relevant measures &amp; outcomes</b></p> <p><b>Mean duration (SD)</b></p> <p><b>No. of initial admissions</b></p> <p><b>LOS in hospital days</b></p> <p><b>Both of above presented as baseline data</b></p> <p><b>No. ED visits at 30 days and 6 mths</b></p> <p><b>Frequent ED return (<math>\geq 3</math> visits over 6 mths)</b></p> <p><b>No. hospital admissions at 6mths</b></p> <p><b>ADL at 6mths (defined as functional decline)</b></p> <p><b>Mortality at 30 days &amp; 6 mths</b></p> <p><b>Costs</b><br/>None</p> | <p>CED vs. GED</p> <p><b>Mean duration (SD)</b><br/><b>6.2(4.5) hrs vs. 12.8 (8.5) hrs</b><br/><b>P&lt;0.001</b></p> <p><b>No. of initial admissions</b><br/>53 vs.63 p=0.2</p> <p><b>LOS in days</b><br/>10(6.65) vs. 10.5(7.2) p=0.74</p> <p><b>No. ED visits</b><br/>30 days<br/>25 vs. 23 visits p=0.88<br/>6months<br/>51 vs. 42 p=0.25</p> <p><b>Frequent ED return (<math>\geq 3</math> visits over 6 mths)</b><br/>11 vs.13 visits p=0.84</p> <p><b>No. hospital admissions at 6mths</b><br/>36 vs.29 p=0.2</p> <p><b>ADL 20 vs. 20 p=0.34</b></p> <p><b>Mortality</b><br/><b>30 days 8 vs. 5 deaths</b><br/><b>6months 20 vs. 19</b><br/>Statistically significant at 6mths after adjustment for age, sex, living status, admission at time of recruitment Charlson index, SPMSQ and ADL<br/><b>p=0.047</b></p> |

| Author<br>Year<br>Country     | Study                                                                                                                                                                         | Participants                                                                                                                                                                                                                                                                                                                                                                                                                                                                                                                                                                                                                                                                                                                                                                                                                                                                                                                                                                                                                                                                   | Intervention                                                                                                                                                                                                                                                                                                                                                                                                                                                                                                                                                                                                                                                                                                                                                                                                                                            | Control                                                                                                                                                                                           | Outcomes assessed                                                                                                                                                                                                                                                                                                                                                                                                                                                                                                                                                                                                   | Results                                                                                                                                                                                                                                                                                                                                                                                                                                                                                                                                                                                                                                                                                                                                                                                       |
|-------------------------------|-------------------------------------------------------------------------------------------------------------------------------------------------------------------------------|--------------------------------------------------------------------------------------------------------------------------------------------------------------------------------------------------------------------------------------------------------------------------------------------------------------------------------------------------------------------------------------------------------------------------------------------------------------------------------------------------------------------------------------------------------------------------------------------------------------------------------------------------------------------------------------------------------------------------------------------------------------------------------------------------------------------------------------------------------------------------------------------------------------------------------------------------------------------------------------------------------------------------------------------------------------------------------|---------------------------------------------------------------------------------------------------------------------------------------------------------------------------------------------------------------------------------------------------------------------------------------------------------------------------------------------------------------------------------------------------------------------------------------------------------------------------------------------------------------------------------------------------------------------------------------------------------------------------------------------------------------------------------------------------------------------------------------------------------------------------------------------------------------------------------------------------------|---------------------------------------------------------------------------------------------------------------------------------------------------------------------------------------------------|---------------------------------------------------------------------------------------------------------------------------------------------------------------------------------------------------------------------------------------------------------------------------------------------------------------------------------------------------------------------------------------------------------------------------------------------------------------------------------------------------------------------------------------------------------------------------------------------------------------------|-----------------------------------------------------------------------------------------------------------------------------------------------------------------------------------------------------------------------------------------------------------------------------------------------------------------------------------------------------------------------------------------------------------------------------------------------------------------------------------------------------------------------------------------------------------------------------------------------------------------------------------------------------------------------------------------------------------------------------------------------------------------------------------------------|
| Garåsen<br>2007/8ab<br>Norway | <b>RCT</b><br><br><b>Intervention:</b><br>Community hospital (CH)<br>n=72 assigned but 8 went<br>on to GH<br><br><b>Control:</b><br>General hospital<br>(GH)admission<br>n=70 | <b>Inclusion criteria:</b><br>Patients aged ≥60 years admitted<br>to general hospital due to acute<br>illness or acute exacerbation of<br>known chronic disease<br><br>Probably in need of in ward care<br>for ≥ 3-4 days<br><br>Admitted from own homes and<br>expected to return home when<br>care finished.<br><br><b>Exclusion criteria</b><br>Severe dementia or a psychiatric<br>disorders needing specialised care<br>24 hours a day.<br><br><b>Baseline characteristics of<br/>participants<br/>(No stats given)</b><br>[including data from<br>n=8 who were assigned CH then<br>went to GH]<br><br>CH vs.GH<br><b>Age</b><br>80.6 (0.8)vs. 81.3(0.8)yrs<br><b>Female</b><br>72 vs.61%<br><b>Living with spouse</b><br>16 vs. 15<br><b>ADL (SD)</b><br>2.24(0.9) vs. 2.05 (0.7)<br><b>Primary diagnosis</b><br><b>Cardio dis</b> 31 vs.29%<br><b>Infect</b> 18vs. 23%<br><b>Fractures/contusions</b><br>19vs. 17%<br><b>Pulmonary disease</b><br>7vs.9%<br><b>Neurological</b> 7 vs.6%<br><b>Cancer</b> 3 vs 6%<br><b>Psychiatric</b> 1vs.0%<br><b>Other</b> 14 vs 11% | <b>Outline of intervention</b><br>On admission to CH the<br>physicians<br>performed a medical<br>examination of the patients<br>and a<br>careful evaluation of<br>available earlier health<br>records from<br>the <b>admitting general<br/>practitioner, the general<br/>hospital physicians and the<br/>community home care<br/>services.</b> The<br>communication with each<br>patient and his family<br>focusing on physical and<br>mental challenges was also<br>essential to understand the<br>needs and level of care.<br>.<br>Assume from the inclusion<br>criteria that all patients<br>came to the general hospital<br>initially then<br><br>' When an eligible patient<br>was identified and accepted<br>for inclusion, a blinded<br>randomisation was<br>performed by the<br>Clinical Research<br>Department at the Faculty<br>of Medicine.' | <b>Outline of control</b><br>The care at different<br>departments at GH and<br>communication with<br>primary health care<br>followed the standard<br>routines through the<br>formal organisation. | <b>Relevant measures &amp;<br/>outcomes</b><br><br>Follow up at 26 weeks & 12<br>months<br><br><b>No. of readmission for<br/>index disease</b><br><br><b>Need for community home<br/>care</b><br><br><b>Need for long term nursing<br/>home</b><br><br><b>Need for long term nursing<br/>home</b><br><br><b>No. of days in institutions<br/>after randomisation<br/>[intervention +rehab<br/>+readmissions] data is<br/>available for separate<br/>services</b><br><br><b>No. of deaths</b><br><br><b>No. of days before death</b><br><br><b>No care</b><br><br>12 month data in [0273]<br><br><b>Costs</b><br>None | CH vs. GH No. (%)<br>At 26 weeks<br><b>No. of readmission for index<br/>disease</b><br><b>14(19%) vs. 25 (36%) p=0.02</b><br><b>Need for community home<br/>care</b><br>38(53%) vs. 44(63%) p=0.37<br><b>Need for long term nursing<br/>home</b><br>7(10%) vs. 5(7%)<br>p= 0.76<br><b>No. days in institutions</b><br>31(95% CI 26.1,34.7) vs.29.8<br>(95% CI 23.2,36.4) p=0.80<br><b>No. of deaths</b><br>9(12.5%) vs14(20%) p=0.15<br><b>No. days before death</b><br>165 (95% CI 154-176) vs. 156<br>(95% CI 144,165)<br><b>No care</b><br><b>18(25%) vs. 7(10%) p=0.01</b><br>12 month data<br><b>No. of deaths</b><br><b>13(18.1%) vs. 22 (31.4%)<br/>p=0.03</b><br><b>Total observation period</b><br><b>335.7(95% CI 312.0,359.4) vs.<br/>292.8(95%CI 264.1,321.5)<br/>days p=0.01</b> |

1  
2  
3  
4  
5  
6  
7  
8  
9  
10  
11  
12  
13  
14  
15  
16  
17  
18  
19  
20  
21  
22  
23  
24  
25  
26  
27  
28  
29  
30  
31  
32  
33  
34  
35  
36  
37  
38  
39  
40  
41  
42  
43  
44  
45  
46  
47

| Author<br>Year<br>Country     | Study                                                                                                                         | Participants                                                                                                                                                                                                                                                                                                                                                                                                                                                                                                                                                                                                                                                                  | Intervention                                                                                                                                                                                                                                                                                                                                                                                                                                                                                                                                                                                                                                                                                                                                                                                                                                                                                                                                               | Control                                                                                                                                                                           | Outcomes assessed                                                                                                                                                                                                                                                                                                                                   | Results                                                                                                                                                                                                                                                                                   |
|-------------------------------|-------------------------------------------------------------------------------------------------------------------------------|-------------------------------------------------------------------------------------------------------------------------------------------------------------------------------------------------------------------------------------------------------------------------------------------------------------------------------------------------------------------------------------------------------------------------------------------------------------------------------------------------------------------------------------------------------------------------------------------------------------------------------------------------------------------------------|------------------------------------------------------------------------------------------------------------------------------------------------------------------------------------------------------------------------------------------------------------------------------------------------------------------------------------------------------------------------------------------------------------------------------------------------------------------------------------------------------------------------------------------------------------------------------------------------------------------------------------------------------------------------------------------------------------------------------------------------------------------------------------------------------------------------------------------------------------------------------------------------------------------------------------------------------------|-----------------------------------------------------------------------------------------------------------------------------------------------------------------------------------|-----------------------------------------------------------------------------------------------------------------------------------------------------------------------------------------------------------------------------------------------------------------------------------------------------------------------------------------------------|-------------------------------------------------------------------------------------------------------------------------------------------------------------------------------------------------------------------------------------------------------------------------------------------|
| Vicente<br>2014<br><br>Sweden | <b>RCT</b><br><b>Intervention:</b><br>Going to a community-based hospital<br>n=410<br><b>Control:</b><br>Going to ED<br>n=396 | <b>Inclusion criteria:</b><br>No specific information<br><b>Exclusion criteria:</b><br>No specific information<br><br>older adults were randomized when they called the emergency number<br><br><b>Baseline characteristics of participants</b><br>Intervention vs. control<br><br><b>Mean age (SD)</b><br>81 (8) vs. 81(8) yrs<br><b>% Female</b><br>56 vs. 59%<br><b>Priority level when ambulance sent out (% individuals)</b><br><b>1. 1.6 vs. 0%</b><br><b>2. 59 vs. 47 %</b><br><b>3. 39 vs.53%</b><br><b>P=0.001</b><br><b>Priority level when ambulance arrives at hospital (% individuals)</b><br><b>1. 7.2 vs.3.6%</b><br><b>2. 39 vs.35%</b><br><b>3.54 vs.61%</b> | <b>Outline of intervention</b><br>The study was conducted over 14 months from Oct 2008 to Dec 2009. Two EMS companies were included in the study. Ambulance personnel at Company 1 had training in and access to the system and tool and could triage eligible individuals to a GW or, a CECC at a CH. By following system and tool & after assessment of the individual's medical situation and care needs, the ambulance nurse was able to decide whether the individual required full ED services or would benefit more from being transported to an assessment at the CH instead.<br><b>Delivered by:</b><br>The ambulance nurse education are required to have a course of 60 credits includes ≥ 30 credits in Caring Science. The criterion for entering this program is a BSc Caring Science and Nursing. Since 2007, a 1-year Master's Degree & postgraduate Diploma in Specialist Nursing, Prehospital Emergency Care Program has been available. | <b>Outline of control</b><br>Ambulance personnel at Company 2 had no training in the system and tool, and transported all individuals to a full-service ED at a tertiary hospital | <b>Relevant measures &amp; outcomes</b><br><br>Primary outcome:<br><b>No. of individuals sent direct to CH for either to GW or CECC</b><br><br><b>Secondary outcome:</b><br><b>No. of subsequent transfers from CH to ED within 24 hrs</b><br><br>Calculated as Intention to treat (ITT) and per protocol (pp) analysis<br><br><b>Costs</b><br>None | Intervention vs. control<br><b>No. of individuals sent direct to CH for either to GW or CECC</b><br>ITT<br>90/449 20% (16.6,24)<br>PP<br>56/273 20.5% (16.1,25.7)<br><b>No. of subsequent transfers from CH to ED within 24 hrs</b><br>ITT 6/90 6.7% (3.1,13.8)<br>PP 4/56 7.1 (2.8,17.0) |



| Author<br>Year<br>Country                | Study                                                                                                                                                                                                       | Participants                                                                                                                                                                                                                                                                                                                                                                                                                                                                                                                                                                                                                                                                                                                                                                                                                                                                                                                                                                                                                                                                                                                                                                                                                                                                                                                                                                                                                                                                                                                                                                                                                                                                                                                                                                                                                                                                                                                                                                                                                                            | Intervention                                                                                                                                                                                                                                                                                                                                                                                                                                                                                                                                                                                                                                                                                                                                                                                                                                                                | Control                                                                               | Outcomes assessed                                                                                                                                                                                                                                                                                                                                                                                             | Results                                                                                                                                                                                                                                                                                                                                                                                                                                                                        |
|------------------------------------------|-------------------------------------------------------------------------------------------------------------------------------------------------------------------------------------------------------------|---------------------------------------------------------------------------------------------------------------------------------------------------------------------------------------------------------------------------------------------------------------------------------------------------------------------------------------------------------------------------------------------------------------------------------------------------------------------------------------------------------------------------------------------------------------------------------------------------------------------------------------------------------------------------------------------------------------------------------------------------------------------------------------------------------------------------------------------------------------------------------------------------------------------------------------------------------------------------------------------------------------------------------------------------------------------------------------------------------------------------------------------------------------------------------------------------------------------------------------------------------------------------------------------------------------------------------------------------------------------------------------------------------------------------------------------------------------------------------------------------------------------------------------------------------------------------------------------------------------------------------------------------------------------------------------------------------------------------------------------------------------------------------------------------------------------------------------------------------------------------------------------------------------------------------------------------------------------------------------------------------------------------------------------------------|-----------------------------------------------------------------------------------------------------------------------------------------------------------------------------------------------------------------------------------------------------------------------------------------------------------------------------------------------------------------------------------------------------------------------------------------------------------------------------------------------------------------------------------------------------------------------------------------------------------------------------------------------------------------------------------------------------------------------------------------------------------------------------------------------------------------------------------------------------------------------------|---------------------------------------------------------------------------------------|---------------------------------------------------------------------------------------------------------------------------------------------------------------------------------------------------------------------------------------------------------------------------------------------------------------------------------------------------------------------------------------------------------------|--------------------------------------------------------------------------------------------------------------------------------------------------------------------------------------------------------------------------------------------------------------------------------------------------------------------------------------------------------------------------------------------------------------------------------------------------------------------------------|
| Patel<br>2008<br>Sweden<br>Heart Failure | <b>pilot RCT</b><br><br><b>Intervention:</b> HC<br>Treated at home after<br>>48hrs treatment in ED<br>(n=13)<br><b>Control:</b> CC<br>Treated in hospital as per<br>hospital treatment<br>guidelines (n=18) | <b>Inclusion criteria:</b><br><i>Into study</i><br>Earlier diagnosed with CHF with diastolic or systolic LVD<br>Deterioration of HF ≥3 days with symptoms of increasing dyspnoea, orthopnoea, weight gain ≥2 kg, debuting peripheral oedema or abdominal swelling<br>Clinical signs, e.g., extended jugular vein, leg oedema, tachypnoea, pulmonary rales, ascites and third heart sound. At least one symptom and one sign should be present<br>New York Heart Association class II–IV<br><i>for home treatment</i><br>It was considered medically safe to treat patients at home if they had a S-Potassium level 3.4–5.5 mmol/L, systolic blood pressure >95 mm Hg, S-Creatinine <250 μmol/L & <50% increase from the baseline value during drug adjustment.<br><b>Exclusion criteria</b><br>Unwillingness to participate<br>Worsening of CHF <3 days<br>Newly onset HF, Pulmonary or pre-pulmonary oedema, Need for monitoring of arrhythmia<br>Other morbidities indicating need for hospitalisation. Living at an institution.<br>Inability to follow instructions<br>S-Haemoglobin <100 g/L or a decrease of S-Haemoglobin >20 g/L<br>S-Creatinine >250 μmol/L<br>S-Potassium >5.5 mmol/L or b3.4 mmol/L<br>S-Troponin T >0.05 μg/L<br>Creatine kinase-MB >5 μg/L<br>ASAT and ALAT >three times above the normal value. Systolic blood pressure >95 mm Hg Heart rate <45 or >110 beats/min<br><b>Baseline characteristics of participants</b><br>Male n (%) 6 (46)/7 (54) 15 (83)/3 (17) 0.03<br>Age (years) mean (SD) 77 (10) 78 (8) ns<br>Marital status n (%) Divorced 2 (15) 3 (17) ns<br>Single 1 (8) 2 (11) ns<br>Widowed 7 (54) 5 (28) ns<br>Education n (%) ≥9 years 1 (8) 8 (44) 0.02 ns<br>Weight kg mean (SD) 71 (13) 79 (15) ns<br>NT-proBNP pg/ml (median and interquartile range) 4420 (1690–14350) 9335 (3375–13350) ns<br>LVEF % mean (SD) 36 (13) 33 (12)<br>Preserved ejection fraction CHF n (%) 3 (23) 2 (11)<br>Systolic CHF n (%) 10 (77) 16 (89)<br>NYHA class n (%) III 1 (5.5) III 13 (100) 16 (89) IV 1 (5.5) truncated | <b>Outline of intervention</b><br>Initially treated in the ED for ≥48 h & then sent home. The specialist HF nurses followed a written physician directed care plan including adjusting medications. A cardiologist could be consulted. All patients followed-up one day after returning home by nurse. The patients were visited daily or every other day for 5–7 days as appropriate. The home visits stopped when: (1) was symptomatically stable or improving, (2) had stable or falling weight, (3) had no signs of pulmonary rales and (4) had no oedema above the ankle. Patients could contact nurse by phone in office hours. Nurses at intensive cardiac care unit could be reached by telephone after office hours. A cardiologist was always available for phone consultation ≤1 month after the last home visit, the nurse was available for phone counselling. | <b>Outline of control</b><br>Treated in hospital as per hospital treatment guidelines | <b>Relevant measures &amp; outcomes</b><br><br><b>Clinical status</b> was documented at 1,4,8& 12 mths<br><br><b>Direct costs</b> for control group based on compensation paid to hospital and for home care group based on time & activities of nurses & physicians plus lab tests and i.v diuretic episodes<br><br><b>Readmissions</b> from hospital data (presumably up to 12mths – not listed in methods) | There was no significant difference in clinical events including readmissions adverse events or in HRQL (measured at baseline too).<br><br>The total cost related to CHF was lower in the HC group after 12 months (p=0.05)<br>detail of costs<br>Euros HC vs. CC<br>Nurse cost 386 (244–1107) vs. N/A<br>Physician 35(19–74) vs. N/A<br>Transport 96953–127) vs. N/A<br>Total cost for care 586 (334–1125) vs. 3277 (2125–5750)<br><br>Readmissions 0.5(0.8) vs. 0.6 (0.8) ns |

| Author<br>Year<br>Country                                                                                                                                                                                               | Study                                                                           | Participants                                                                                                                                                          | Intervention                                                                                                                                                                                                                                                                                                                                                                                                                                                                                                                                                                                                                                                                                                                                                                                                                                                                                                                                                                                                                                                                                                                                                                                                                                                                                                                                                                                                                                                                                                                                                                                                                                                | Control                                                                                                                                                                                                                                                                                                                                                                                                                                                                                                                                                                                                                                                                                                                                                                                                                                                                                                                                                                                                                                                                                                                           | Outcomes assessed                                                                                                                                                                                            | Results                                                                                                                                                                                                                                                                                                                                                                                                                                                                                                                                                                                                                                                                                                                                                                                                                                                                                                                                                                                                                           |                                                                                                                                                                                                                                                                                                                                                                                                                                                                                                                                                                                                                                   |
|-------------------------------------------------------------------------------------------------------------------------------------------------------------------------------------------------------------------------|---------------------------------------------------------------------------------|-----------------------------------------------------------------------------------------------------------------------------------------------------------------------|-------------------------------------------------------------------------------------------------------------------------------------------------------------------------------------------------------------------------------------------------------------------------------------------------------------------------------------------------------------------------------------------------------------------------------------------------------------------------------------------------------------------------------------------------------------------------------------------------------------------------------------------------------------------------------------------------------------------------------------------------------------------------------------------------------------------------------------------------------------------------------------------------------------------------------------------------------------------------------------------------------------------------------------------------------------------------------------------------------------------------------------------------------------------------------------------------------------------------------------------------------------------------------------------------------------------------------------------------------------------------------------------------------------------------------------------------------------------------------------------------------------------------------------------------------------------------------------------------------------------------------------------------------------|-----------------------------------------------------------------------------------------------------------------------------------------------------------------------------------------------------------------------------------------------------------------------------------------------------------------------------------------------------------------------------------------------------------------------------------------------------------------------------------------------------------------------------------------------------------------------------------------------------------------------------------------------------------------------------------------------------------------------------------------------------------------------------------------------------------------------------------------------------------------------------------------------------------------------------------------------------------------------------------------------------------------------------------------------------------------------------------------------------------------------------------|--------------------------------------------------------------------------------------------------------------------------------------------------------------------------------------------------------------|-----------------------------------------------------------------------------------------------------------------------------------------------------------------------------------------------------------------------------------------------------------------------------------------------------------------------------------------------------------------------------------------------------------------------------------------------------------------------------------------------------------------------------------------------------------------------------------------------------------------------------------------------------------------------------------------------------------------------------------------------------------------------------------------------------------------------------------------------------------------------------------------------------------------------------------------------------------------------------------------------------------------------------------|-----------------------------------------------------------------------------------------------------------------------------------------------------------------------------------------------------------------------------------------------------------------------------------------------------------------------------------------------------------------------------------------------------------------------------------------------------------------------------------------------------------------------------------------------------------------------------------------------------------------------------------|
| 1<br>2<br>3<br>4<br>5<br>6<br>7<br>8<br>9<br>10<br>11<br>12<br>13<br>14<br>15<br>16<br>17<br>18<br>19<br>20<br>21<br>22<br>23<br>24<br>25<br>26<br>27<br>28<br>29<br>30<br>31<br>32<br>33<br>34<br>35<br>36<br>37<br>38 | Mendoza<br>2009<br>Garcia-<br>Soletto<br>2013<br><br>Spain<br><br>Heart Failure | <b>RCT</b><br><br><b>Intervention:</b><br>Hospital at home (HAH)<br>care (n=37)<br><b>Control:</b><br>Inpatient hospital care<br>(IHC) in a cardiology unit<br>(n=34) | <b>Inclusion criteria:</b><br>Patient of 65 years and over<br>With diagnosis and prognosis<br>evaluation of HF since at least 12<br>months prior to the study<br>NYHA functional class II or III<br>before coming to ED due to<br>exacerbation<br><b>Exclusion criteria</b><br>Admitted in the preceding 2<br>months for deterioration of HF or<br>acute coronary syndrome<br>Presence of severe symptoms such<br>as sudden worsening of HF<br>Poor prognosis factors<br>(haemodynamic instability, severe<br>arrhythmia, baseline creatinine<br>above 2.5 mg/dL)<br>No response to treatment in the<br>ED<br>Active cancer, severe dementia, or<br>any other disease at an advanced<br>stage indicating life expectancy of<br>less than 6 months<br>Acute psychiatric diseases, active<br>alcoholism<br>Active pulmonary tuberculosis<br>Those living in a psycho-geriatric<br>institution<br>No guarantee of all-day<br>supervision<br>Absence of a telephone at home or<br>living more than 10 km from the<br>hospital<br><b>Baseline characteristics of<br/>participants IHC vs. HaH</b><br>Women, n (%) 10 (29.4) 19 (51.4)<br>0.06 Age, mean +SD 79.9+6.3<br>78.1+6.2 0.20 Admissions for HF in<br>previous year 0.41+0.86 0.65+0.86<br>0.13 O2 saturation in ED 91.4+5.2<br>93.2+4.6 0.12 Functional Class<br>NYHA II, n (%) 23 (67.6) 19 (51.4)<br>Functional Class NYHA<br>III, n (%) 11 (32.4) 18 (48.6) 0.16<br>Atrial fibrillation, n (%) 16 (47) 21<br>(56.8) 0.49 LVEF ≥45%, n (%) 24<br>(70) 23 (62.1) LVEF, <45%, n (%)<br>10 (29.4) 14 (37.8) 0.13 NT-proBNP<br>(pg/mL) 4056+5352 3864+3720<br>0.86 Charlson index 2.1+1.3<br>2.5+1.5 0.35 | <b>Outline of intervention</b><br>Characteristics of the HaH<br>unit explained whilst still in<br>ED. Given information sheet<br>with contact phone<br>numbers. Within 12–24 h of<br>the ED visit, patients<br>received scheduled & if<br>necessary, urgent visits to<br>their homes from an<br>internal medicine specialist<br>& a nurse, (staff of the HaH<br>unit). If deterioration<br>occurred outside the<br>working hours (8am–9 pm<br>every day of yr), patients &<br>family were instructed to<br>call 112 to explain they<br>were HaH patients.<br>Samples were taken for lab<br>tests and ECGs were<br>performed in patient's<br>home<br><br>X-ray & echocardiography at<br>hospital was as<br>accessible for HaH patients<br>as for in-patients. Generally<br>all patients were visited<br>daily by a specialist nurse.<br>Patients were visited by a<br>physician daily or every<br>other day depending on<br>condition. Treatment in HaH<br>finished with referral to<br>primary care after<br>recovery or, in case of<br>deterioration or no<br>response to treatment, with<br>transfer to the cardiology<br>ward. | <b>Outline of control</b><br>Patients were admitted<br>to hospital, cardiology<br>ward & were managed<br>by the usual staff of<br>cardiology specialists<br>and nurses, in<br>accordance with<br>guidelines. | <b>Relevant measures &amp;<br/>outcomes</b><br><br>No distinction between<br>primary and secondary<br>outcomes<br><br><b>Effectiveness</b><br>Necessity to transfer the<br>patient from HaH to IHC<br>during the first admission<br>Mortality due to any cause,<br>re-admission due to HF, or<br>another cardiovascular<br>event (stroke, acute<br>coronary syndrome, and<br>coronary revascularization)<br>during 1 year of follow-up.<br>Functional status -Barthel<br>index<br>Health-related quality of life<br>-SF-36 since first admission<br>up to 12 months later<br><br><b>Costs</b><br>Cost of the stay<br>Medication, diagnostic tests<br>(electrocardiography,<br>echocardiography,<br>laboratory tests, and chest<br>X-ray), consumables, and<br>transport.<br>visits to HF clinic, primary<br>care physician or ED, as well<br>as re-admissions.<br>For re-hospitalizations, the<br>cost of the admission was<br>estimated as the average<br>cost per day incurred during<br>the first admission for each<br>group. | Clinical outcomes were similar<br>after initial admission and also<br>after the 12 months of follow-<br>up.<br><br>Death or re-admission due to<br>HF or a cardiovascular event<br>occurred in 19 patients in IHC<br>and 20 in HaH (P=0.88).<br><br>Changes in functional status<br>and health-related quality of<br>life over the follow-up period<br>were not significantly<br>different.<br><br>Average cost<br>of initial admission<br>4502±2153E in IHC and<br>2541±1334E in HaH (P< 0.001).<br><br>During 12 months of<br>follow-up, the average<br>expenditure was 4619+7679E<br>and 3425+4948E (P= 0.83)<br>respectively. |

| Author<br>Year<br>Country                                                                                                                                                                                   | Study                                         | Participants                                                                                                                                                                                                                          | Intervention                                                                                                                                                                                                                                                                                                                                                                                                                                                                                                                                                                                                                                                                                                                                                                                                                                                                                                                                                                                                                                                                                                                                                                                                                                                                                                                                                                                                                                                             | Control                                                                                                                                                                                                                                                                                                                                                                                                                                                                                                                                                                                                                                                                                                                                                                                                                                                                                                                                                                                                                                                                                                                                                                                                                                            | Outcomes assessed                                                                                                                                                                                                                           | Results                                                                                                                                                                                                                                                                                                                                 |                                                                                                                                                                                                                                                                                                                                                                                                                                                                                                                                                                                                                                                                                                                                                                          |
|-------------------------------------------------------------------------------------------------------------------------------------------------------------------------------------------------------------|-----------------------------------------------|---------------------------------------------------------------------------------------------------------------------------------------------------------------------------------------------------------------------------------------|--------------------------------------------------------------------------------------------------------------------------------------------------------------------------------------------------------------------------------------------------------------------------------------------------------------------------------------------------------------------------------------------------------------------------------------------------------------------------------------------------------------------------------------------------------------------------------------------------------------------------------------------------------------------------------------------------------------------------------------------------------------------------------------------------------------------------------------------------------------------------------------------------------------------------------------------------------------------------------------------------------------------------------------------------------------------------------------------------------------------------------------------------------------------------------------------------------------------------------------------------------------------------------------------------------------------------------------------------------------------------------------------------------------------------------------------------------------------------|----------------------------------------------------------------------------------------------------------------------------------------------------------------------------------------------------------------------------------------------------------------------------------------------------------------------------------------------------------------------------------------------------------------------------------------------------------------------------------------------------------------------------------------------------------------------------------------------------------------------------------------------------------------------------------------------------------------------------------------------------------------------------------------------------------------------------------------------------------------------------------------------------------------------------------------------------------------------------------------------------------------------------------------------------------------------------------------------------------------------------------------------------------------------------------------------------------------------------------------------------|---------------------------------------------------------------------------------------------------------------------------------------------------------------------------------------------------------------------------------------------|-----------------------------------------------------------------------------------------------------------------------------------------------------------------------------------------------------------------------------------------------------------------------------------------------------------------------------------------|--------------------------------------------------------------------------------------------------------------------------------------------------------------------------------------------------------------------------------------------------------------------------------------------------------------------------------------------------------------------------------------------------------------------------------------------------------------------------------------------------------------------------------------------------------------------------------------------------------------------------------------------------------------------------------------------------------------------------------------------------------------------------|
| 1<br>2<br>3<br>4<br>5<br>6<br>7<br>8<br>9<br>10<br>11<br>12<br>13<br>14<br>15<br>16<br>17<br>18<br>19<br>20<br>21<br>22<br>23<br>24<br>25<br>26<br>27<br>28<br>29<br>30<br>31<br>32<br>33<br>34<br>35<br>36 | Tibaldi<br>2009<br>Italy<br><br>Heart Failure | <p><b>single blind RCT</b></p> <p><b>Intervention:</b><br/>Physician led - Geriatric Home Hospitalization Service (GHHS; n=48)</p> <p><b>Control:</b><br/>Patients were randomly assigned to the general medical ward (GMW; n=53)</p> | <p><b>Inclusion criteria:</b><br/>≥75 years with a pre-existing diagnosis of CHF (stage C AHA) &amp; persistent functional impairment indicative of NYHA class III or IV status presenting at hospital ED for acute decompensation (defined) &amp; in need of hospital care. Additional inclusion criteria were appropriate care supervision at home, telephone connection, living in the hospital at- home catchment area, informed consent, at least 1 previous admission for acute CHF, and need for intravenous drug infusion.</p> <p><b>Exclusion criteria</b><br/>New-onset heart failure; absence of family and social support; need for mechanical ventilation, hemodialysis, or intensive monitoring; severe dementia ; terminal malignant neoplasm; severe renal impairment; hepatic failure; serum hemoglobin level less than 9 g/dL; and planned cardiac surgery(eg, valve replacement).</p> <p><b>Baseline characteristics of participants</b><br/>Long list of demographic &amp; clinical baseline – truncated GHHS vs. GMV<br/>Mean age 82.2 (5.2) vs. 80.1(4.9) p=0.04<br/>Male (%) 22(46) vs. 30 (57)<br/>Married (%) 22 (46) vs. 24 (45)<br/>Family support at home (%) 48(100) vs. 53(100)<br/>Length of disease (yr) 5.4 (4.7) vs. 5.2 (4.7) plus clinical symptoms both cardiovascular &amp; general including functional status (Barthel index) depression (GDS) MMSE, MNA, comorbidity measured by CIRS 3.6 (1) vs. 3.4 (2) All ns except age</p> | <p><b>Outline of intervention</b><br/>The team has 7 cars, is multidisciplinary and consists: 4 geriatricians, 13 nurses, 3 physio-therapists, 1 social worker &amp;1 counselor working together as a team, with daily meetings 7 days a week. In ED all necessary diagnostic tests are provided and then the patient moves home by ambulance, usually within a few hours. Medical consultation with other hospital specialists is possible in the hospital or at the home of the patient. Treatments included physician and nurse visits, standard blood tests, pulse oximetry, spirometry, electrocardiography, echocardiography etc (as per hospital) Patients treated at home and family members obtained adequate Education e.g. early recognition of symptoms. Protocols for prevention of nosocomial infections, bed sores, and immobilization are routinely adopted for frail elderly inpatients. In the first days after admission to GHHS patient was visited at home on a daily basis by physicians and nurses. In the following days this care is tapered off as appropriate Consultation with cardiologists or other hospital specialists was possible. Physicians and nurses were available at all times for urgent home visits.</p> | <p><b>Outline of control</b><br/>The inpatient control group (GMW) received routine hospital care. Protocols for prevention of nosocomial infections, bed sores, and immobilization are routinely adopted for frail elderly inpatients.</p> | <p><b>Relevant measures &amp; outcomes</b></p> <p><b>Primary outcome</b><br/>Mortality at 6 months.</p> <p><b>Secondary outcomes</b><br/>morbidity (infections, delirium, bed sores, deep vein thrombosis, and falls) during hospitalization, admissions to a nursing home, and subsequent hospital admissions related to any cause</p> | <p><b>Primary outcomes</b><br/>Patient mortality at 6 months was 15% in the total sample, without significant differences between the 2 settings of care. ( 7 vs. 8 deaths )</p> <p><b>Secondary outcomes</b><br/>The number of subsequent hospital admissions was not statistically different in the 2 groups 8 (17%) vs. 18 (34%)</p> <p>mean (SD) time to first additional admission was longer for the GHHS patients (84.3 [22.2] days vs 69.8[36.2] days, <math>P=0.02</math>).</p> <p>Only the GHHS patients experienced improvements in Depression (GDS) +1.48 (1.860 vs. +0.12 (3.36) <math>p=0.02</math>) nutritional status (MNA) - 0.86(1.12) vs. -0.27 (1.78) <math>p=0.05</math> Quality-of-life(NHP) +1.09 (2.57 vs. +0.18 (1.94) <math>p=0.046</math></p> |

| Author  | Year | Country | Study                                                                                                                                                          | Participants                                                                                                                                                                                                                                                                                                                                                                                                                                                                                                                                                                                                                                                                                                                                                                                                                                                                                                                                                                                                                                                                                                                                                                                                                                                                                                                                                                                                                                                                                                                                                                                                                                                                                                                  | Intervention                                                                                                                                                                                                                                                                                                                                                                                                                                                                                                                                                                                                                                                                                                                                                                                                                                                                                                                                                                                                                                                                                                                                  | Control                                                                                                                      | Outcomes assessed                                                                                                                                                                                                                                                                                                                                                                                                                                                                                                                                                                                                                           | Results                                                                                                                                                                                                                                                                                                                                                                                                                                                                                                                                                                                                                                                                          |
|---------|------|---------|----------------------------------------------------------------------------------------------------------------------------------------------------------------|-------------------------------------------------------------------------------------------------------------------------------------------------------------------------------------------------------------------------------------------------------------------------------------------------------------------------------------------------------------------------------------------------------------------------------------------------------------------------------------------------------------------------------------------------------------------------------------------------------------------------------------------------------------------------------------------------------------------------------------------------------------------------------------------------------------------------------------------------------------------------------------------------------------------------------------------------------------------------------------------------------------------------------------------------------------------------------------------------------------------------------------------------------------------------------------------------------------------------------------------------------------------------------------------------------------------------------------------------------------------------------------------------------------------------------------------------------------------------------------------------------------------------------------------------------------------------------------------------------------------------------------------------------------------------------------------------------------------------------|-----------------------------------------------------------------------------------------------------------------------------------------------------------------------------------------------------------------------------------------------------------------------------------------------------------------------------------------------------------------------------------------------------------------------------------------------------------------------------------------------------------------------------------------------------------------------------------------------------------------------------------------------------------------------------------------------------------------------------------------------------------------------------------------------------------------------------------------------------------------------------------------------------------------------------------------------------------------------------------------------------------------------------------------------------------------------------------------------------------------------------------------------|------------------------------------------------------------------------------------------------------------------------------|---------------------------------------------------------------------------------------------------------------------------------------------------------------------------------------------------------------------------------------------------------------------------------------------------------------------------------------------------------------------------------------------------------------------------------------------------------------------------------------------------------------------------------------------------------------------------------------------------------------------------------------------|----------------------------------------------------------------------------------------------------------------------------------------------------------------------------------------------------------------------------------------------------------------------------------------------------------------------------------------------------------------------------------------------------------------------------------------------------------------------------------------------------------------------------------------------------------------------------------------------------------------------------------------------------------------------------------|
| Ricauda | 2008 | Italy   | Single blind RCT<br><br><b>Intervention:</b><br>Geriatric home hospitalization service (GHHS, n=52)<br><br><b>Control:</b><br>General medical ward (GMW, n=52) | <b>Inclusion criteria:</b><br>Patients ≥75 yrs with a diagnosis of acute exacerbation of COPD, defined on Anthonisen criteria as an increase in breathlessness, sputum volume, or purulence for at least 24 hours, admitted to the ED & requiring hospitalization. Additional inclusion criteria were appropriate care supervision in the home, telephone connection, living in the HaH & informed consent.<br><br><b>Exclusion criteria</b><br>Absence of family and social support; severe hypoxemia (partial pressure of oxygen <50 mmHg); severe acidosis or alkalosis (pH <7.35 or >7.55); suspected pulmonary embolism; suspected myocardial infarction; severe comorbid illness as defined by presence of need for hemodialysis, severe renal impairment (glomerular filtration rate <20 mL/min), cancer (except skin cancer), hepatic failure, or severe dementia (Mini-Mental State Examination score <14).<br><br><b>Baseline characteristics of participants</b><br>Intervention vs. control<br>Age, mean ±SD 80.1 ±3.2 79.2 ± 3.1 p=0.20 Male, n (%) 29 (56) 39 (75) p=0.06 Married, n (%) 27 (52) 29 (56) .84 Family support n (%) 52 (100) 52 (100) p=0.89 Current smoker, n (%) 7 (13) 6 (11) p=0.97 Ex-smoker, n (%) 34 (65) 35 (67) p=0.95 FEV1, mean ±SD 0.92 ±0.4 1.04 ± 0.5 p=0.18 % of predicted FEV1 38, 47 Home oxygen use, n(%) 18 (35) 12 (23) p=0.45 Arterial blood gas, mean ±SD pH 7.40 ± 0.04 7.41 ± 0.03 .19 PP of O <sub>2</sub> 69 ± 19 65 ±14 .p= 0.23 PP of CO <sub>2</sub> 44 ± 12 46 ± 12 .47 ADL score, mean ± SD ± 2.3 ± 2.2 1.9 ± 2.2 p=0.36 IADL score, mean ± SD 7.1 ± 4.9 8.1 ± 4.2 .27 GDS score, mean ± SD 16.1 ± 6.1 17.2 ± 6.8 .45 Comorbidity index 2.6 ± 1.5 3.0 ± 1.8 p=0.24 | <b>Outline of intervention</b><br><b>Intervention delivered by:</b><br>"a physician-led substitutive hospital-at-home model of care"<br><br>Patients assigned to HaH were immediately transferred home by ambulance. At home, a multi-dimensional geriatric assessment was conducted & patients received hospital-level treatment & services, as their condition dictated. (Physician and nursing visits, standard blood tests, pulse oximetry, electrocardiogram, spirometry, echocardiogram, echographs and Doppler ultrasonographs, oral & intravenous medication administration, including antimicrobials & cytotoxic drugs, oxygen therapy, blood products transfusion, central venous access, surgical treatment of pressure sores, physical therapy & occupational therapy<br><br>The HaH program emphasized patient & caregiver education about the knowledge of the disease, giving advice about smoking cessation, nutrition, management of activities of daily living & energy conservation, understanding & use of drugs, health maintenance, & early recognition of triggers of exacerbation that required medical intervention. | <b>Outline of control</b><br><b>Intervention delivered by:</b><br>The inpatient control group received routine hospital care | <b>Relevant measures &amp; outcomes</b><br><br><b>Primary outcomes</b><br>Hospital readmission & mortality rates at 6 months.<br><br><b>Secondary outcomes</b><br>Depression status -Geriatric Depression Scale, functional status- Katz activities of daily living & Lawton instrumental activities of daily living<br>Cognitive status -Mini-Mental State Examination, Quality of life -the Nottingham Health Profile<br>Nutritional status -Mini Nutritional Assessment, Caregiver characteristics - Relatives' Stress Scale, & satisfaction using ad hoc questionnaire for Scale.<br>Costs of care were compared for the acute episode. | <b>Primary outcomes</b><br>GHHS vs. GMW<br>Hospital readmissions at 6mths 42% vs 87%, P= 0.001<br>Cumulative mortality at 6 mths was 20.2% in the total sample, No significant differences between grps.<br><br><b>Secondary outcomes</b><br>Mean length of stay 15.5 ±9.5 vs 11.0 ± 7.9 days, P= 0.010<br>Only GHHS patients experienced improvements in depression and QoL scores but ns between grps<br>There were no differences in functional, cognitive, nutritional, or caregiver burden outcomes.<br>Satisfaction at discharge was very good or excellent for 94% vs. 88% (P=0.83)<br>(On a cost per patient per day basis, (\$101.4 ± 61.3 vs \$151.7 ± 96.4, P=0.002). |

| Author<br>Year<br>Country                                                                                                                                                                                                                                                     | Study                                                                | Participants                                                                                                                                                                                                                                                                                                                                                                                                                                                                                                                                                                                                                                                                                                                                                                                                                                                                                                                                                                                                                                                                                                                                                                                                                                                                                                                                                                                                                           | Intervention                                    | Control                                    | Outcomes assessed                                                                                                                                                                                                                                                                   | Results                                                                                                                                                                                                                                                                                                                                                                                                                                                                                                                                                                                                                                                                                                                                                                                                                                                             |
|-------------------------------------------------------------------------------------------------------------------------------------------------------------------------------------------------------------------------------------------------------------------------------|----------------------------------------------------------------------|----------------------------------------------------------------------------------------------------------------------------------------------------------------------------------------------------------------------------------------------------------------------------------------------------------------------------------------------------------------------------------------------------------------------------------------------------------------------------------------------------------------------------------------------------------------------------------------------------------------------------------------------------------------------------------------------------------------------------------------------------------------------------------------------------------------------------------------------------------------------------------------------------------------------------------------------------------------------------------------------------------------------------------------------------------------------------------------------------------------------------------------------------------------------------------------------------------------------------------------------------------------------------------------------------------------------------------------------------------------------------------------------------------------------------------------|-------------------------------------------------|--------------------------------------------|-------------------------------------------------------------------------------------------------------------------------------------------------------------------------------------------------------------------------------------------------------------------------------------|---------------------------------------------------------------------------------------------------------------------------------------------------------------------------------------------------------------------------------------------------------------------------------------------------------------------------------------------------------------------------------------------------------------------------------------------------------------------------------------------------------------------------------------------------------------------------------------------------------------------------------------------------------------------------------------------------------------------------------------------------------------------------------------------------------------------------------------------------------------------|
| 1<br>2<br>3<br>4<br>5<br>6<br>7<br>8<br>9<br>10<br>11<br>12<br>13<br>14<br>15<br>16<br>17<br>18<br>19<br>20<br>21<br>22<br>23<br>24<br>25<br>26<br>27<br>28<br>29<br>30<br>31<br>32<br>33<br>34<br>35<br>36<br>37<br>38<br>39<br>40<br>41<br>42<br>43<br>44<br>45<br>46<br>47 | Rodriguez-Cerillo<br>2009<br>Spain<br>non-massive Pulmonary embolism | <p><b>Inclusion criteria:</b><br/><i>For trial</i></p> <p>Non-massive pulmonary embolism</p> <ul style="list-style-type: none"> <li>No contraindications for treatment with low MW heparin</li> <li>Absence of moderate to severe renal failure</li> <li>Haemodynamic stability</li> <li>O2 saturation higher than 92% breathing room air</li> <li>No signs of heart failure</li> <li>No arrhythmia</li> <li>No haemoptysis</li> </ul> <p><i>For HH</i></p> <ul style="list-style-type: none"> <li>Agreement to admission to our HH unit</li> <li>A valid caregiver at home</li> <li>Residence in our health area</li> <li>A condition amenable to home management</li> </ul> <p><b>Exclusion criteria</b><br/>massive PE, haemodynamic instability, oxygen saturation lower than 92% on room air, heart failure, haemoptysis, arrhythmia &amp; contraindication for treatment with low MW heparin</p> <p><b>Baseline characteristics of participants</b><br/>Age 66.8 (27–91) 66.7 (31–90) n.s<br/>Sex (males) 30% 54.8% n.s<br/>Diagnosed neoplasm 13.3% 9.7% n.s<br/>Associated DVT 40% 29% n.s<br/>Prior TED 0% 19.3% 0.05<br/>Dementia 23.3% 6.4% n.s.<br/>Hypertension 30% 45.1% n.s.<br/>Ischaemic heart disease 6.6% 9.6% n.s.<br/>Thrombophilia 3.3% 0% n.s<br/>Recent surgery 3.3% 6.4% n.s<br/>Unilateral involvement 70% 61.3% n.s<br/>Bilateral involvement 30% 38.7% n.s<br/>Diagnosed by helical CT 26.6% 38.7% n.s</p> | Outline of intervention<br><br><b>No detail</b> | Outline of control<br><br><b>No detail</b> | <p><b>Relevant measures &amp; outcomes</b></p> <p>No distinction between Primary and secondary outcomes</p> <p>Major and minor bleeding<br/>Re-thrombosis,<br/>Clinical course<br/>Unexpected returns to hospital<br/>Need for hospital re-admission in the following 3 months.</p> | <p>All comparisons ns</p> <p>Mean stay length HH vs. CH 8.9 days (7–14 days), vs. 10.6 days (6–20 days).</p> <p>All patients in study had a favourable clinical course.</p> <p>No major bleeding, re-thrombosis, or death occurred.</p> <p>One patient on HH experienced an abdominal wall haematoma in the area of administration of the low MW heparin.</p> <p>One patient admitted to hospital experienced a haematoma in the right arm related to blood sampling for laboratory tests.</p> <p>No patient with HH had infectious complications. Three patients admitted to hospital were diagnosed of urinary tract infection.</p> <p>No HH patients required unexpected return to hospital during admission.</p> <p>During follow-up, two patients required hospital admission, one in each group. The cause was not related to the thromboembolic disease.</p> |

| Author<br>Year<br>Country                                                                                                                                                                                                                                                     | Study                                   | Participants                                                                                                                                                                                                                          | Intervention                                                                                                                                                                                                                                                                                                                                                                                                                                                                                                                                                                                                                                                                                                                                                                                                                                                                                                                                                                                                                                                                                                                                                                                                                                                                                                                                                                                                                                                                                                                | Control                                                                                                                                                                                                                                                                                                                                                                                                                                                                                                                                                                                                                                                                                                                                                                                                        | Outcomes assessed                                                                                                                                                                                                                                                                                                                                                                                                                                                                                                                                                                                                                                                                                                                                                                                                                                                                                                                                                              | Results                                                                                                                                                                                                                                                                                                                                                                                                                                                                                                                                                                                                                                         |                                                                                                                                                                                                                                                                                                                                                                                                                                                                                                                                                                         |
|-------------------------------------------------------------------------------------------------------------------------------------------------------------------------------------------------------------------------------------------------------------------------------|-----------------------------------------|---------------------------------------------------------------------------------------------------------------------------------------------------------------------------------------------------------------------------------------|-----------------------------------------------------------------------------------------------------------------------------------------------------------------------------------------------------------------------------------------------------------------------------------------------------------------------------------------------------------------------------------------------------------------------------------------------------------------------------------------------------------------------------------------------------------------------------------------------------------------------------------------------------------------------------------------------------------------------------------------------------------------------------------------------------------------------------------------------------------------------------------------------------------------------------------------------------------------------------------------------------------------------------------------------------------------------------------------------------------------------------------------------------------------------------------------------------------------------------------------------------------------------------------------------------------------------------------------------------------------------------------------------------------------------------------------------------------------------------------------------------------------------------|----------------------------------------------------------------------------------------------------------------------------------------------------------------------------------------------------------------------------------------------------------------------------------------------------------------------------------------------------------------------------------------------------------------------------------------------------------------------------------------------------------------------------------------------------------------------------------------------------------------------------------------------------------------------------------------------------------------------------------------------------------------------------------------------------------------|--------------------------------------------------------------------------------------------------------------------------------------------------------------------------------------------------------------------------------------------------------------------------------------------------------------------------------------------------------------------------------------------------------------------------------------------------------------------------------------------------------------------------------------------------------------------------------------------------------------------------------------------------------------------------------------------------------------------------------------------------------------------------------------------------------------------------------------------------------------------------------------------------------------------------------------------------------------------------------|-------------------------------------------------------------------------------------------------------------------------------------------------------------------------------------------------------------------------------------------------------------------------------------------------------------------------------------------------------------------------------------------------------------------------------------------------------------------------------------------------------------------------------------------------------------------------------------------------------------------------------------------------|-------------------------------------------------------------------------------------------------------------------------------------------------------------------------------------------------------------------------------------------------------------------------------------------------------------------------------------------------------------------------------------------------------------------------------------------------------------------------------------------------------------------------------------------------------------------------|
| 1<br>2<br>3<br>4<br>5<br>6<br>7<br>8<br>9<br>10<br>11<br>12<br>13<br>14<br>15<br>16<br>17<br>18<br>19<br>20<br>21<br>22<br>23<br>24<br>25<br>26<br>27<br>28<br>29<br>30<br>31<br>32<br>33<br>34<br>35<br>36<br>37<br>38<br>39<br>40<br>41<br>42<br>43<br>44<br>45<br>46<br>47 | Carratala<br>2005<br>Spain<br>Pneumonia | <b>Open RCT</b><br><br><b>Intervention:</b><br>Outpatient care with oral levofloxacin therapy or hospitalization with sequential intravenous and oral levofloxacin therapy. (n=110)<br><br><b>Control:</b><br>Hospitalisation (n=114) | <b>Inclusion criteria:</b><br>All immunocompetent patients who were at least 18 years of age and had received a diagnosis of community acquired pneumonia in the emergency department (24 hrs per day, 7 days per week)<br><br>Community acquired pneumonia was defined as the presence of a new infiltrate on chest radiography plus at least 1 of the following: fever (temperature $\geq 38.0$ °C) or hypothermia (temperature $< 35.0$ °C), new cough with or without sputum production, pleuritic chest pain, dyspnea, or altered breath sounds on auscultation.<br><b>Exclusion criteria</b><br><br>Neutropenia, HIV infection, transplantation, or splenectomy or who were taking immunosuppressive drugs<br><br><b>Baseline characteristics of participants</b><br>Male 69 (62.7) 66 (57.9)<br>Female 41 (37.3) 48 (42.1)<br>Mean age $\pm$ SD, $\gamma$ 67.5 $\pm$ 11.8 64.9 $\pm$ 13.4<br>Alcohol consumption $\pm 80$ g/d, <i>n</i> (%) 13 (12.4) 7 (6.4)<br>Current tobacco smoking, <i>n</i> (%)# 21 (19.8) 24 (21.8)<br>Influenza vaccine in current season, <i>n</i> (%)§ 44 (42.7) 49 (46.2)<br>Pneumococcal vaccine in the previous 5 yrs, <i>n</i> (%) $\pm$ 15 (15.6) 13 (13.1)<br>Comorbid conditions, <i>n</i> (%) 71 (64.5) 78 (68.4)<br>Mean oxygen saturation $\pm$ SD, % 94.5 $\pm$ 2.0 94.5 $\pm$ 1.8<br>Multilobar pneumonia, <i>n</i> (%) 8 (7.3) 9 (7.9)<br>Risk class, <i>n</i> (%)    55 (50.0) 63 (55.3)     55 (50.0) 51 (44.7)<br>Mean PSI score $\pm$ SD 70.0 $\pm$ 11.6 66.9 $\pm$ 12.5 | <b>Outline of intervention</b><br>Outpatients were given oral levofloxacin (500 mg/d), and received detailed written information about their pneumonia diagnosis and their treatment plan, as well as emergency contact telephone numbers for a nurse or investigator physician. Patients were visited at home by a nurse 48 hours after emergency department discharge. The visit included assessment of vital signs and measurement of oxygen saturation by pulse oximetry. If the nurse thought that a patient's condition was not improving (worsening of baseline vital signs, oxygen saturation, or both), one of the investigators made an additional visit. The nurse was involved only in outcome assessment. Patients were seen at the outpatient clinic at days 7 and 30 after pneumonia diagnosis. | <b>Outline of control</b><br>Hospitalized patients received sequential intravenous and oral levofloxacin (500 mg/d) and received detailed written information about their pneumonia diagnosis and their treatment plan, as well as emergency contact telephone numbers for a nurse or investigator physician g/d) Patients assigned to hospitalization were seen daily during their hospital stay by attending physicians and by at least 1 of the investigators. Criteria for early switching from intravenous to oral levofloxacin were a respiratory rate of 24 breaths/min or less, a pulse rate of 100 beats/min or less, a temp of 37.8 °C or lower on 2 occasions at least 8 hours apart, and maintenance of adequate oral intake. Physicians were advised to discharge patients after their clinical condition stabilized, in accordance with previously recommended criteria. Patients were seen at the outpatient clinic at days 7 and 30 after pneumonia diagnosis. | <b>Relevant measures &amp; outcomes</b><br><br><b>Primary outcomes</b><br>% of patients with an overall successful outcome at the end of treatment, according to 7 predefined criteria: cure of pneumonia (as defined later), absence of adverse drug reactions, absence of medical complications during treatment, no need for additional visits, no changes in initial treatment with levofloxacin, <b>absence of subsequent hospital admission in the 30 days after randomization</b> , and absence of death from any cause in the 30 days after randomization.<br><br><b>Secondary outcomes</b><br>Patients' quality of life & satisfaction | Intervention vs. control<br><br><b>Primary outcome</b><br>Successful outcome was achieved in 83.6 vs. 80.7% (absolute difference, 2.9 % points [95% CI, $\pm 7.1$ to 12.9 % points]).<br>% patients with adverse drug reactions (9.1% vs. 9.6%),<br>Subsequent hospital admissions (6.3% vs. 7.0%),<br>Overall mortality (0.9% vs. 0%)<br>Medical complications (0.9% vs. 2.6%),<br><br><b>Secondary outcomes</b><br>All ns<br>Quality of life (9.1% vs. 9.6%)<br>Satisfied with overall care (91.2% vs. 79.1%; absolute difference, 12.1% [CI, 1.8 to 22.5 % points]). |

| Author<br>Year<br>Country                                                                                                                                                                                   | Study                                                                                                                                                                                                                                                                                                                                                                                                                                                                                                                                                                                                                                                                                                                                                                                                                                                                                    | Participants                                                                                                                                                                                                                                                                                                                                                                                                                                                                                                                                                                                                                                                                                                                                                                                                                                                                                                                                                                                                                                                                          | Intervention                                                                                                                                                                                                                                                                                                                                                                                                                                                                                                                                                                                                                                                                                                                                                                                                                                                                                                                                                                                                                                                                                                                                                                                                                                                                                                                                                                                                                                                                                                                                                                       | Control                                                                                                                                                                                                                                                                                                                                                                                                                                                                                                                                                                                                                                                                                                                                          | Outcomes assessed                                                                                                                                                                                                                                                                                                                                      | Results                                                                                                                                                                                                                                                                                                                                                                                                                                                                                                                                                                                                                                                                                                                                                                                                                                                                                                                                                                                                                                                                                                                                                          |
|-------------------------------------------------------------------------------------------------------------------------------------------------------------------------------------------------------------|------------------------------------------------------------------------------------------------------------------------------------------------------------------------------------------------------------------------------------------------------------------------------------------------------------------------------------------------------------------------------------------------------------------------------------------------------------------------------------------------------------------------------------------------------------------------------------------------------------------------------------------------------------------------------------------------------------------------------------------------------------------------------------------------------------------------------------------------------------------------------------------|---------------------------------------------------------------------------------------------------------------------------------------------------------------------------------------------------------------------------------------------------------------------------------------------------------------------------------------------------------------------------------------------------------------------------------------------------------------------------------------------------------------------------------------------------------------------------------------------------------------------------------------------------------------------------------------------------------------------------------------------------------------------------------------------------------------------------------------------------------------------------------------------------------------------------------------------------------------------------------------------------------------------------------------------------------------------------------------|------------------------------------------------------------------------------------------------------------------------------------------------------------------------------------------------------------------------------------------------------------------------------------------------------------------------------------------------------------------------------------------------------------------------------------------------------------------------------------------------------------------------------------------------------------------------------------------------------------------------------------------------------------------------------------------------------------------------------------------------------------------------------------------------------------------------------------------------------------------------------------------------------------------------------------------------------------------------------------------------------------------------------------------------------------------------------------------------------------------------------------------------------------------------------------------------------------------------------------------------------------------------------------------------------------------------------------------------------------------------------------------------------------------------------------------------------------------------------------------------------------------------------------------------------------------------------------|--------------------------------------------------------------------------------------------------------------------------------------------------------------------------------------------------------------------------------------------------------------------------------------------------------------------------------------------------------------------------------------------------------------------------------------------------------------------------------------------------------------------------------------------------------------------------------------------------------------------------------------------------------------------------------------------------------------------------------------------------|--------------------------------------------------------------------------------------------------------------------------------------------------------------------------------------------------------------------------------------------------------------------------------------------------------------------------------------------------------|------------------------------------------------------------------------------------------------------------------------------------------------------------------------------------------------------------------------------------------------------------------------------------------------------------------------------------------------------------------------------------------------------------------------------------------------------------------------------------------------------------------------------------------------------------------------------------------------------------------------------------------------------------------------------------------------------------------------------------------------------------------------------------------------------------------------------------------------------------------------------------------------------------------------------------------------------------------------------------------------------------------------------------------------------------------------------------------------------------------------------------------------------------------|
| 1<br>2<br>3<br>4<br>5<br>6<br>7<br>8<br>9<br>10<br>11<br>12<br>13<br>14<br>15<br>16<br>17<br>18<br>19<br>20<br>21<br>22<br>23<br>24<br>25<br>26<br>27<br>28<br>29<br>30<br>31<br>32<br>33<br>34<br>35<br>36 | <p>Kalra<br/>2005<br/>UK<br/>Stroke</p> <p><b>RCT</b></p> <p><b>Intervention:</b><br/>1) <b>ST (n=152)</b><br/>The stroke team involved management on general wards with specialist team support. The team undertook stroke assessments and advised ward-based nursing and therapy staff on acute care, secondary prevention and rehabilitation aspects.<br/>2) <b>DC (n=153)</b><br/><b>Domiciliary care provided management at home under the supervision of a GP and stroke specialist with support from specialist team and community services.</b><br/><b>Support was provided for a maximum of 3 months.</b></p> <p><b>Control:</b><br/>Usual care <b>SU (n=152)</b><br/>The stroke unit provided 24-hour care provided by a specialist multidisciplinary team based on clear guidelines for acute care, prevention of complications, rehabilitation and secondary prevention.</p> | <p>Patients were included within 72 hours of stroke onset. The research team was notified by telephone or fax by GPs for patients at home, and by accident and emergency (A&amp;E) services for suspected stroke patients presenting to the casualty department.</p> <p><b>Inclusion criteria:</b><br/>Patients with disabling stroke who could be supported at home with nursing, therapy and social services input on initial assessment were included in the study.</p> <p><b>Exclusion criteria</b><br/>Patients with mild stroke, severe strokes, already admitted to hospitals, and those with unusual or atypical neurological features who required specialised assessments or investigation to establish a diagnosis of stroke. Patients who were institutionalised or had severe disability (Rankin 4 or 5) before stroke</p> <p><b>Baseline characteristics of participants SU vs. ST vs. HC</b><br/>Median age (years) (IQR) 75 (72–84) 77.3 (71–83) 77.7 (67–83)<br/>No. of females (%) 69 (46.6) 76 (50.6) 68 (45.6) Living alone (%) 50 (33.7) 55 (36.6) 50 (33.5)</p> | <p><b>Outline of intervention</b><br/><b>ST</b> Patients were managed on general wards &amp; under care of admitting physicians. All patients were seen by specialist team: doctor (specialist registrar grade), a nurse (grade G), a physiotherapist (senior I) and an occupational therapist (senior I) with expertise in stroke management. Patients were assessed by the specialist team, which undertook a diagnostic evaluation and assessment for needs. Ward provided the day-to-day treatment, the team advised on specialist aspects of stroke care. It reviewed progress and treatment of individual patients with ward team &amp; helped in discharge planning and setting up of post discharge services. The team provided counselling, education and support to the family, identified expectations and advised about realistic outcomes in the context of previous morbidity and present deficits.</p> <p><b>DC</b> Patients were managed in own home by a specialist team consisting of a doctor (specialist registrar), a nurse (G grade) &amp; therapists (senior I grades), with support from district nursing and social services for nursing and personal care needs. Patients were under the joint care of the stroke physician and GP. Investigations, including CT scanning, were performed in outpatient s. Therapy was provided by members of the specialist stroke team. Each patient had an individualised integrated care pathway outlining activities and the objectives of treatment, which was reviewed at weekly multi-disciplinary meetings.</p> | <p><b>Outline of control</b><br/><b>SU</b><br/>Care was provided by a stroke physician supported by a multidisciplinary team with specialist experience in stroke management. There were clear guidelines for acute care, prevention of complications, rehabilitation and secondary prevention, and a culture of joint assessments, goal setting, coordinated treatment and discharge planning.</p> <p>A coordinated multidisciplinary approach was adopted towards rehabilitation, with emphasis on early mobilisation. All patients had an individualised rehabilitation plan with clearly defined goals based on joint assessments. Patient participation was encouraged, with focus on motivation and providing an enriched environment.</p> | <p><b>Relevant measures &amp; outcomes</b></p> <p><b>Primary outcomes</b><br/>Death or institutionalisation at 1 year.</p> <p>Dependence - modified Rankin Scale (mRS),</p> <p><b>Secondary outcomes included</b><br/>Orgogozo scale, BI and FAI for disability, the mRS for handicap</p> <p>EuroQoL-quality of life of patients and their carers.</p> | <p>Mortality and institutionalisation at 1yr were lower on SU vs.ST or DC</p> <p>Significantly fewer patients on SU died compared with ST</p> <p>The proportion of patients alive without severe disability at 1 year was also significantly higher on SU vs. ST or DC.</p> <p>These differences were present at 3 &amp; 6 mths after stroke.</p> <p>Stroke survivors on SU showed greater improvement on basic activities of daily living compared the other two grps. Achievement of higher levels of function was not influenced by strategy of care.</p> <p>QoL at 3mths was significantly better in SU &amp; DC patients.</p> <p>There was greater dissatisfaction with care with ST vs. SU or DC.</p> <p>Poor outcomewith DC and ST was associated with Barthel Index &lt;5, incontinence and with ST, age &gt;75 years.</p> <p>The total costs of stroke per patient over 12mths were £11,450 for SU, £9527 for ST &amp; £6840 for DC<br/>The mean costs per day alive for the SU were significantly less than those for the ST , but no different from DC patients.<br/>Costs for DC were significantly less than for those managed by the SU or ST.</p> |



| Author             | Year | Country | Study                                                                                                                                                                                                                                            | Participants                                                                                                                                                                                                                                                                                                                                                                                                                                                                                                                                                                                                                                                                                                                                                                                                                                                                                                                                                                                                                                                                                         | Intervention                                                                                                                                                                                                                                                                                                                                                                                                                                                                                                                                                                                                                     | Control                                                                                                                                                                       | Outcomes assessed                                                                                    | Results                                                                                                                                                                                                                                                                                                                                                                                                                                                                                                   |
|--------------------|------|---------|--------------------------------------------------------------------------------------------------------------------------------------------------------------------------------------------------------------------------------------------------|------------------------------------------------------------------------------------------------------------------------------------------------------------------------------------------------------------------------------------------------------------------------------------------------------------------------------------------------------------------------------------------------------------------------------------------------------------------------------------------------------------------------------------------------------------------------------------------------------------------------------------------------------------------------------------------------------------------------------------------------------------------------------------------------------------------------------------------------------------------------------------------------------------------------------------------------------------------------------------------------------------------------------------------------------------------------------------------------------|----------------------------------------------------------------------------------------------------------------------------------------------------------------------------------------------------------------------------------------------------------------------------------------------------------------------------------------------------------------------------------------------------------------------------------------------------------------------------------------------------------------------------------------------------------------------------------------------------------------------------------|-------------------------------------------------------------------------------------------------------------------------------------------------------------------------------|------------------------------------------------------------------------------------------------------|-----------------------------------------------------------------------------------------------------------------------------------------------------------------------------------------------------------------------------------------------------------------------------------------------------------------------------------------------------------------------------------------------------------------------------------------------------------------------------------------------------------|
| Rodriguez-Cerrillo | 2013 | Spain   | <p><b>Prospective controlled study</b></p> <p><b>Intervention:</b><br/>Patients stayed 24 h in the Observation Ward within ED prior to discharge and treatment at home. (n=34)</p> <p><b>Control:</b><br/>Traditional hospitalization (n=18)</p> | <p><b>Inclusion criteria:</b><br/>≥70 years diagnosed with uncomplicated diverticulitis (The existence of abscess, fistula, bowel obstruction and peritonitis)<br/>Patients who were willing to be treated at home and had a caregiver 24 h a day were transferred to HaH. The rest of the patients were admitted to conventional hospitalization.</p> <p><b>Exclusion criteria</b><br/>Patients with complicated diverticulitis, β-lactam allergy or who required admission to hospital for other pathology</p> <p><b>Baseline characteristics of participants</b><br/>intervention vs. control</p> <p>Age 77 (71–90) 79 (71–98)<br/>Sex (female) 28 (82.4%) 16 (84.2%)<br/>Cardiopathy 9 (26.5%) 6 (31.6%)<br/>Diabetes mellitus 4 (11.7%) 2 (10.5%)<br/>Chronic renal failure 4 (11.7%) 1 (5.2%)<br/>Neoplasm 1 (2.9%) 1 (5.2%)<br/>COPD 1 (2.9%) 1 (5.2%)<br/>Corticosteroids 4 (11.7%) 2 (10.5%)<br/>Previous diverticulitis 7 (20.5%) 3 (15.8%)<br/>Abdominal pain 34 (100%) 19 (100%)<br/>Fever 9 (26.5%) 6 (31.6%)<br/>Diarrhea 6 (17.6%) 3 (15.8%)<br/>Leucocytosis 7 (20.5%) 3 (15.8%)</p> | <p><b>Outline of intervention</b></p> <p><b>Intervention delivered by:</b><br/>All patients were given Ertapenem after diagnosis. Patients in HaH grp stayed 24 h in the observation ward within ED prior to discharge.<br/>At home, nurses administrated Ertapenem every day. The physician conducted 2–3 home visits per week, depending on the patient's clinical course. On admission patients were provided with a phone number to contact the unit if any problem arose. Intravenous antibiotic was changed to oral therapy (amoxicillin–clavulanate) after 4–6 days of treatment until complete 10 days of treatment.</p> | <p><b>Outline of control</b></p> <p><b>Intervention delivered by:</b><br/>All patients were given ertapenem after diagnosis &amp; experienced traditional hospitalisation</p> | <p><b>Relevant measures &amp; outcomes</b></p> <p>No primary nor secondary outcomes were defined</p> | <p>A small amount of free fluid was present in 38% of patients treated with HaH and 42% of patients in hospital. All patients had a good clinical evolution. None of the patients treated with HaH needed be transferred to hospital.<br/>Mean stay was 9 days in HaH vs. 10 days in Hospital.<br/>The cost of each patient with diverticulitis treated at home was 1368 euros cheaper than the cost of a patient treated in the hospital (fewer staff and important reduction of maintenance costs).</p> |



| Author Year Country                                                                                                                                                                                                                                                           | Study                                                                                            | Participants                                                                                                                                                                                                                                                                                                                                                                                                                                                                                                                                                                                                                                                                                                                                                                                                                                                                                                                                                                                                                                                                                                                                                                                                                                                                                      | Intervention                                                                                                                                                                                                                                                                                                                                                                                                                                                                                                                                                                                                                                                                                                                                                                                                                                                                                                                                                                                                                                                                                                                                                                                                                                                                                             | BMJ Open                                                                                                                                                                                                                                                                                                                                                                                                                                                                                                                                                                                                                                                                                                                                                                                                                                                                                               | Control                                                                                                                   | Outcomes assessed                                                                                                                                                                                                                                                                                                                                                                                                                                                                                                                                                                                                                                                                                                                                                                                                                                                                                                                                                                                                                                                                                                                                                                                       | Results                                                                                                                                                                                                                                                                                                                                                                                                                                                                                                                                                                                                                                                                                                                                                                                                                                  |
|-------------------------------------------------------------------------------------------------------------------------------------------------------------------------------------------------------------------------------------------------------------------------------|--------------------------------------------------------------------------------------------------|---------------------------------------------------------------------------------------------------------------------------------------------------------------------------------------------------------------------------------------------------------------------------------------------------------------------------------------------------------------------------------------------------------------------------------------------------------------------------------------------------------------------------------------------------------------------------------------------------------------------------------------------------------------------------------------------------------------------------------------------------------------------------------------------------------------------------------------------------------------------------------------------------------------------------------------------------------------------------------------------------------------------------------------------------------------------------------------------------------------------------------------------------------------------------------------------------------------------------------------------------------------------------------------------------|----------------------------------------------------------------------------------------------------------------------------------------------------------------------------------------------------------------------------------------------------------------------------------------------------------------------------------------------------------------------------------------------------------------------------------------------------------------------------------------------------------------------------------------------------------------------------------------------------------------------------------------------------------------------------------------------------------------------------------------------------------------------------------------------------------------------------------------------------------------------------------------------------------------------------------------------------------------------------------------------------------------------------------------------------------------------------------------------------------------------------------------------------------------------------------------------------------------------------------------------------------------------------------------------------------|--------------------------------------------------------------------------------------------------------------------------------------------------------------------------------------------------------------------------------------------------------------------------------------------------------------------------------------------------------------------------------------------------------------------------------------------------------------------------------------------------------------------------------------------------------------------------------------------------------------------------------------------------------------------------------------------------------------------------------------------------------------------------------------------------------------------------------------------------------------------------------------------------------|---------------------------------------------------------------------------------------------------------------------------|---------------------------------------------------------------------------------------------------------------------------------------------------------------------------------------------------------------------------------------------------------------------------------------------------------------------------------------------------------------------------------------------------------------------------------------------------------------------------------------------------------------------------------------------------------------------------------------------------------------------------------------------------------------------------------------------------------------------------------------------------------------------------------------------------------------------------------------------------------------------------------------------------------------------------------------------------------------------------------------------------------------------------------------------------------------------------------------------------------------------------------------------------------------------------------------------------------|------------------------------------------------------------------------------------------------------------------------------------------------------------------------------------------------------------------------------------------------------------------------------------------------------------------------------------------------------------------------------------------------------------------------------------------------------------------------------------------------------------------------------------------------------------------------------------------------------------------------------------------------------------------------------------------------------------------------------------------------------------------------------------------------------------------------------------------|
| 1<br>2<br>3<br>4<br>5<br>6<br>7<br>8<br>9<br>10<br>11<br>12<br>13<br>14<br>15<br>16<br>17<br>18<br>19<br>20<br>21<br>22<br>23<br>24<br>25<br>26<br>27<br>28<br>29<br>30<br>31<br>32<br>33<br>34<br>35<br>36<br>37<br>38<br>39<br>40<br>41<br>42<br>43<br>44<br>45<br>46<br>47 | Leff<br>[3066]<br><br>2005<br><br>USA<br><br>Plus<br>Leff 2009<br>[2545]<br>Frick 2009<br>[0158] | <b>Inclusion criteria:</b><br>Community-dwelling persons ≥65 yrs old, Lived in catchment area<br>In the opinion of a physician not involved in study, required admission to an acute care hospital for these illnesses: community-acquired pneumonia, exacerbation of chronic heart failure or chronic obstructive pulmonary disease, or cellulitis.<br>Required to meet validated criteria of medical eligibility for hospital-at-home care.<br><b>Exclusion criteria</b><br>Most common reasons for medical ineligibility were uncorrectable hypoxemia, suspected myocardial ischemia, and presence of an acute illness, other than the target illness, for which the patient was required to be hospitalized.<br><b>Baseline characteristics of participants at all sites (Stats shown if signif)</b><br>Observation vs. intervention Age (SD) 77.3 (6.6) vs.77.2(7.0)<br>% female 34 vs. 42%<br>% white 90 vs.86%<br><b>% in poverty 11 vs.19% p=0.027</b><br><b>% live alone 43 vs.33% p=0.022</b><br>Mean mini mental state (SD)25.5 (4.2) vs. 25.2(4.4)<br>Mean Charlson score (SD) 3.1 (2.0) vs.3.0 (1.8)<br><b>Mean medications (SD) 6.8 (3.9) vs. 8.1(4.5) p=0.002</b><br>%Primary admission diagnosis<br>Pneumonia 31vs. 32%<br>COPD 32 vs.28%<br>Cellulitis 12 vs 18%<br>CHF 25vs.22% | The study was conducted in 3 Medicare managed care (Medicare +Choice) plans at 2 sites and at a Veterans Administration medical centre. Univera Health and Independent Health, in Buffalo, New York, are Medicare + Choice plans These 2 plans collaborated to provide hospital- at-home care and made up 1 study site (site 1).<br><br>The Fallon Health Care System (site 2), in Worcester, Massachusetts, operates a not-for-profit Medicare +Choice plan, and the Fallon Clinic, a for-profit multispecialty physician group, provides care on a capitated basis to Medicare + Choice beneficiaries.<br><br>The Portland, Oregon, Veterans Administration Medical Center (site 3) is a quaternary care and teaching facility.<br><br>A patient requiring admission to the acute care hospital for a target illness was identified in an ED or ambulatory site and his or her eligibility status was determined. Non-study medical personnel, usually ED physicians, made the decision to hospitalize the patient. All patients who were offered but who declined hospital-at-home care were admitted to the acute care hospital.<br>Study coordinators verified the patient's eligibility for HaH using a standard protocol at enrolment. Most patients were identified the morning after admission. | <b>Outline of intervention &amp;who delivered</b> 1 Nov 2001-30 Sep 2002<br>Patients evaluated by HaH physician either in ED or after ambulance transfer to home. HaH nurse met ambulance at patient's home and provided direct one-on-one nursing for an initial period of ≤ 8hrs at site 3 and ≤24 hrs at sites 1 & 2. followed by intermittent nursing visits and HaH physician at least daily. HaH physician was available 24 hours a day for visits. Nursing and other care components, e.g. durable medical equipment, oxygen therapy were provided and some services e.g. home radiology, support provided by independent contractors. Lifeline devices were provided for patients living alone. Diagnostic tests , IV fluids, IV antimicrobial agents, etc. and oxygen/respiratory therapies were provided at home.<br>Patient was followed by same physician until discharged to primary care | <b>Outline of control</b><br>1 Nov 1990-30 Sep 2001) Eligible patients identified & followed through usual hospital care. | <b>Relevant measures &amp; outcomes</b><br><br><b>No distinction between primary and secondary outcomes</b><br>Intervention group comprised all patients eligible for hospital-at-home care, irrespective of where they were treated.<br>[thus some outcomes are NOT useful to us but some measures are HaH specific]<br><br><b>Mean LoS (SD) days [Leff 2005]</b><br><br><b>Mean time in ED (SD) in hrs</b><br>.....<br><br>Sub-analysis of HaH vs. Non-HaH (i.e. different to main report [Leff 2009])<br><b>Changes in ADL and IADL from 1mth before admission -2 weeks after intervention</b><br><br><b>Costs</b><br><b>Within each health system and per condition [Frick 2009]</b><br><br><b>Overall summary</b><br>'The HaH care model is feasible, safe, and efficacious for certain older patients with selected acute medical illnesses who require acute hospital-level care.' Leff 2005<br>HaH care is associated with modestly better improvements in IADL status and trends toward more improvement in ADL status than traditional acute hospital care. Leff 2009<br>Total costs seem to be lower when substitutive HaH care is available for patients with CHF or COPD disease.Frick2009 | Intervention vs. control<br><br><b>Mean LoS (SD) days</b><br><b>4.9 (9.9) 3.2 (2.5) p =0.004</b><br><br><b>Mean time in ED (SD) in hrs</b><br><b>6.4(1.8,11.6)SD 1.9 vs. 5.5(1.0,21.3) SD3.2 P=0.001</b><br>[Leff 2005]<br>-----<br><b>Changes in ADL and IADL from 1mth before admission -2 weeks after intervention</b><br>ADL 0.39(3.13) vs. -0.6(3.09) p=0.1<br><b>IADL 0.74(2.86) vs. -0.70(2.68) p=0.007</b><br>[Leff 2009]<br><br><b>Costs</b><br><b>Within each health system and per condition Mean (SD)</b><br>Overall<br><b>\$5081(4427)vs.\$7480(8113) p&lt;0.001</b><br>Pneumonia<br>\$5272(6036) vs. \$6761(6451) NS<br>Congestive heart failure<br><b>\$3310(2118) vs. \$6399(6643) p≤0.001</b><br>COPD<br><b>\$4293(3806) vs. \$6500(7305) p≤0.05</b><br>Cellulitis<br>\$4262(2309) vs. \$7287(11471) NS<br>[Frick 2009] |

| Author<br>Year<br>Country   | Study                                                                                                                                                                                | Participants                                                                                                                                                                                                                                                                                                                                                                                                                                                                                                                                                                                                                                                                                                                                                                                                                                                                                                                                                                                                          | Intervention                                                                                                                                                                                                                                                                                                                                                                                                                                                                                                                                                                                                                                                                                                                                                                                                                                                                                                                                                                                                                                                                     | Control                                                                                                                                                                                                                                                                                                                                                                                                                                                                                                                                                                | Outcomes assessed                                                                                                                                                                                                                                                                                                                                                                         | Results                                                                                                                                                                                                                                                                                                                                                                                                                                                                                                                                    |
|-----------------------------|--------------------------------------------------------------------------------------------------------------------------------------------------------------------------------------|-----------------------------------------------------------------------------------------------------------------------------------------------------------------------------------------------------------------------------------------------------------------------------------------------------------------------------------------------------------------------------------------------------------------------------------------------------------------------------------------------------------------------------------------------------------------------------------------------------------------------------------------------------------------------------------------------------------------------------------------------------------------------------------------------------------------------------------------------------------------------------------------------------------------------------------------------------------------------------------------------------------------------|----------------------------------------------------------------------------------------------------------------------------------------------------------------------------------------------------------------------------------------------------------------------------------------------------------------------------------------------------------------------------------------------------------------------------------------------------------------------------------------------------------------------------------------------------------------------------------------------------------------------------------------------------------------------------------------------------------------------------------------------------------------------------------------------------------------------------------------------------------------------------------------------------------------------------------------------------------------------------------------------------------------------------------------------------------------------------------|------------------------------------------------------------------------------------------------------------------------------------------------------------------------------------------------------------------------------------------------------------------------------------------------------------------------------------------------------------------------------------------------------------------------------------------------------------------------------------------------------------------------------------------------------------------------|-------------------------------------------------------------------------------------------------------------------------------------------------------------------------------------------------------------------------------------------------------------------------------------------------------------------------------------------------------------------------------------------|--------------------------------------------------------------------------------------------------------------------------------------------------------------------------------------------------------------------------------------------------------------------------------------------------------------------------------------------------------------------------------------------------------------------------------------------------------------------------------------------------------------------------------------------|
| Crilly<br>2010<br>Australia | 'quasi experimental'<br><br>[Controlled (his) study ]<br><br><b>Intervention:</b><br>Hospital in the nursing home (HINH) n=62<br><br><b>Control:</b><br>Usual in-hospital care n=115 | <b>Inclusion criteria:</b><br>Reside in an ACF.<br>Have a signed GP request for HINH review from the ACF.<br>Be of any age (usually ≥ 65 yrs).<br>Present with an illness that required hospital services but not necessarily admission e.g. UTI & could have treatment e.g. antibiotics continued by ACF staff.<br>Prior to start of HINH, patients who would have fit inclusion criteria for hospital admission<br><b>Exclusion criteria:</b><br>ACF residents who required extensive treatment that could not be managed in ACF or who required specific services that could only be received in hospital e.g. surgery<br><br><b>Baseline characteristics of participants</b><br><b>HINH vs. Control</b><br>Age (SD) 85(7.1) vs.84.6(6.6)years<br>Triage category<br>3.2 (0.7) vs.3.2(0.7)<br>Female 76vs. 75%<br>Diagnostic category: Respiratory 24 vs.26%<br>Cellulitis 18 vs.17%<br>Kidney/urinary tract 18vs.16%<br>Cardiac 10 vs. 10 %<br>Abdominal/GI 8vs.8%<br>Viral/sepsis 7 vs.6%<br>All other 16 vs.17% | In the ED. Enrolments were made by HINH programme manager (registered nurse) with programme director ( ED director), GPs and ACF nursing staff, as appropriate. After hours and on weekends, if patient was suitable for HINH , they stayed in ED short stay unit and were reviewed by HINH nurse on next weekday.<br><br><b>Outline of intervention</b><br>The HINH nurse checks with the ACF registered nurse and patient on the patients' progress initially on a daily basis and then every couple of days. Discharge occurs when required treatment has ceased. This completes the patients' hospital-affiliated episode.<br><br><b>Intervention delivered by:</b><br>HINH programme delivers acute care nursing support services, medication and equipment to the ACF registered nurse and/or enrolled nurse. These services may include<br>initial training and education regarding antibiotic or IV fluid administration; specific wound treatment and dressing procedure (with dressing materials); suprapubic catheter care, behaviour management and palliative care. | <b>Outline of control</b><br>The comparison group was selected from patients who presented to ED and were subsequently admitted during the same time period. To be included in this group, the patients had to reside in an ACF and be aged ≥65yrs. ACF residents who presented to the ED were in some cases not enrolled in HINH because they had a medical problem that was judged as possibly requiring in-hospital admission services beyond those offered by the HINH.<br><br><b>Intervention delivered by:</b><br>No details but presumably usual hospital staff | <b>Relevant measures &amp; outcomes</b><br><br><b>Hospital LOS (days)</b><br><br><b>ED LOS (hours)</b><br><br><b>Episode of care (total time) LOS (days)</b><br><br><b>Long (≥6days) vs. short hospital LOS</b><br><br><b>Long (≥8 days) ED LOS vs. short</b><br><br><b>Long episode of care (≥6 days)</b><br><br><b>Hospital readmissions within 28 days</b><br><br><b>Costs</b><br>None | HINH vs. Control<br><br>Mean (SD)<br><b>Hospital LOS</b><br><b>2.19 (0.82) vs.6.2(0.59) days</b><br><b>p&lt;0.001</b><br><br><b>ED LOS</b><br><b>9.94(0.66) vs. 7.01(0.47) hrs</b><br><b>p=0.005</b><br><br><b>Episode of Care LOS</b><br>9.56(1.26)vs. 6.20(0.59) days<br>p=0.14<br><br>Percentages<br><b>Hospital LOS 6+days</b><br><b>9.6 vs. 40 p&lt;0.001</b><br>Episode of care 6+days<br>46.8 vs.40.0 p=0.35<br><b>LOS in ED 8+ hours</b><br><b>50.0vs.33.9 p=0.05</b><br><br><b>Readmission in 28 days</b><br>11.3 vs. 11.3 p=0.99 |

| Author<br>Year<br>Country                                                                                                                                                                                                                                                     | Study                            | Participants                                                                                                                                                                           | Intervention                                                                                                                                                                                                                                                                                                                                                                                                                                                                                                                                                                                                                                                                                                                                                                                                                                                                                                                                                                                                                                                                                                                                                                                                                                                                                                                                                                                                                                                                                                                                                                                                                                                                                                                                                                                                                                                                                                                                                                                                                                                                                                        | Control                                                                                                                                                                                                                                                                                                                                                                                  | Outcomes assessed                                                                                                                                                                                                                                                                                                                                        | Results                                                                                                                                                                                                                                                                                                                                                                                                                                                                                                          |
|-------------------------------------------------------------------------------------------------------------------------------------------------------------------------------------------------------------------------------------------------------------------------------|----------------------------------|----------------------------------------------------------------------------------------------------------------------------------------------------------------------------------------|---------------------------------------------------------------------------------------------------------------------------------------------------------------------------------------------------------------------------------------------------------------------------------------------------------------------------------------------------------------------------------------------------------------------------------------------------------------------------------------------------------------------------------------------------------------------------------------------------------------------------------------------------------------------------------------------------------------------------------------------------------------------------------------------------------------------------------------------------------------------------------------------------------------------------------------------------------------------------------------------------------------------------------------------------------------------------------------------------------------------------------------------------------------------------------------------------------------------------------------------------------------------------------------------------------------------------------------------------------------------------------------------------------------------------------------------------------------------------------------------------------------------------------------------------------------------------------------------------------------------------------------------------------------------------------------------------------------------------------------------------------------------------------------------------------------------------------------------------------------------------------------------------------------------------------------------------------------------------------------------------------------------------------------------------------------------------------------------------------------------|------------------------------------------------------------------------------------------------------------------------------------------------------------------------------------------------------------------------------------------------------------------------------------------------------------------------------------------------------------------------------------------|----------------------------------------------------------------------------------------------------------------------------------------------------------------------------------------------------------------------------------------------------------------------------------------------------------------------------------------------------------|------------------------------------------------------------------------------------------------------------------------------------------------------------------------------------------------------------------------------------------------------------------------------------------------------------------------------------------------------------------------------------------------------------------------------------------------------------------------------------------------------------------|
| 1<br>2<br>3<br>4<br>5<br>6<br>7<br>8<br>9<br>10<br>11<br>12<br>13<br>14<br>15<br>16<br>17<br>18<br>19<br>20<br>21<br>22<br>23<br>24<br>25<br>26<br>27<br>28<br>29<br>30<br>31<br>32<br>33<br>34<br>35<br>36<br>37<br>38<br>39<br>40<br>41<br>42<br>43<br>44<br>45<br>46<br>47 | Lau<br><br>2013<br><br>Australia | <b>Controlled (his) Case series</b><br><br><b>Intervention</b> Treatment in residential care facilities (TRC) grp n=95<br><br><b>Control</b> Hospital-based aged care unit (ACU) n=167 | <b>Inclusion criteria:</b><br>Patient and/or family consent<br>Capacity within HITH to accept the patient<br>Facility able to manage the care needs of the patient in the residential aged care facility (RACF)<br><br><b>Exclusion criteria:</b><br>Lack of consent from patient and/or family.<br>Behavioural disturbances, which may prevent the delivery of care e.g. aggressive behaviour and frequent removal of IV, access device.<br>History of recent falls, which may impact on the delivery of care in the RACF.<br>If there was conflict regarding management, further input and discussion were carried out in ACU.<br><br><b>Baseline characteristics of participants</b><br><br>TRC vs. ACU<br><b>Age</b> 83.5 vs. 82.8yrs<br><b>Female</b> 53 vs. 59%<br><b>Non-English speaking</b> 42 vs. 48%<br><b>High level of nursing home care</b> 72 vs. 76%<br><b>Dementia</b> 77.9 vs. 45.5% p<0.001<br><b>Charlson score</b> 7.1 SD 1.9 vs. 7.2 SD 2.3<br><br><b>Outline of intervention</b><br>Treatment in Residential Care facilities (TRC) delivered by the Residential Care Intervention Program into the Elderly (RECIPE) service between July-Oct 2008.<br><br><b>Appropriate Clinical Diagnosis</b><br>Dehydration, Pneumonia, Urinary Tract Infection, Gastroenteritis, Deep Venous Thrombosis, Terminal care support.<br><br><b>Treatment can therefore include any of the following:</b><br>IV antibiotics & IV fluids<br>Anticoagulation<br>Oxygen therapy (low flow)<br>Appropriate Allied Health intervention<br>Palliative support*<br>Referral to other appropriate support programs<br><br>* [TRC also offered palliative care as appropriate. If patient's condition changed and management could not be continued, transfer into acute hospital was organized. If patients had uncertain prognosis, treatment was given, followed by palliative care if no response despite optimal treatment.]<br><br><b>Intervention delivered by:</b><br>Geriatrician, registrar and nursing staff with access to allied health staff such as physiotherapy, OT, speech pathology and social work. | <b>Outline of control</b><br>Aged care unit (ACU)<br><br>Inpatients treated in ACU in preceding year July-October 2007, before existence of TRC.<br>ACU is a service for inpatients who have been admitted from residential care facilities for the management of general medical conditions.<br><br><b>Intervention delivered by:</b><br>No details but presumably usual hospital staff | <b>Relevant measures &amp; outcomes</b><br><br><b>Palliative care</b><br><br><b>Mortality on discharge</b><br><br><b>6-month mortality</b><br><br><b>Rehospitalisation within 1-month</b><br><br><b>Total hospitalisation at 6 months</b><br><br><b>Length of hospital care/stay</b><br><br>All measured as 'present or not'<br><br><b>Costs</b><br>None | TRC vs. ACU<br><b>Palliative care</b><br><b>34 (35.8%) 13 (7.8%) &lt;0.001</b><br><b>Mortality on discharge</b><br>11 (11.6%) 20 (12.0%)<br>p=0.924<br><b>6-month mortality</b><br>29 (30.5%) 51 (30.5%)<br>p=0.184<br><b>Re-hospitalization within 1 month</b><br>20 (21.1%) 35 (21.0%) p=0.986<br><b>Total re-hospitalization at 6 months</b><br>39 (41.1%) 68 (40.7%) p=0.963<br><b>Length of stay</b><br><b>Mean ( no SD given ) 2vs.11 days</b><br><b>P&lt;0.001</b><br>Equivalent of 270 vs. 1840 bed days |

1  
2  
3  
4  
5  
6  
7  
8  
9  
10  
11  
12  
13  
14  
15  
16  
17  
18  
19  
20  
21  
22  
23  
24  
25  
26  
27  
28  
29  
30  
31  
32  
33  
34  
35  
36  
37  
38  
39  
40  
41  
42  
43  
44  
45  
46  
47

## Appendix 6: Characteristics of those older patients for whom the decision to admit to hospital may be unclear

| Patient characteristics                                                                                                                | Studies which include such populations                                                                                                                                                                                     |
|----------------------------------------------------------------------------------------------------------------------------------------|----------------------------------------------------------------------------------------------------------------------------------------------------------------------------------------------------------------------------|
| <b>Age ≥75 years</b><br>for included patients                                                                                          | 15/19 studies<br><br>Mason 2007 & 2012; Benaiges 2014; Salvi 2008; Garasen 2007; Vincente 2014; Patel 2008; Mendoza 2009; Tibaldi 2009; Ricauda 2008; Kalra 2005; Rodriguez-Cerillo 2013; Leff 2005; Crilly 2010; Lau 2013 |
| <b>Co/multi-morbidities</b><br>in included patients stated either by number of conditions or multi-morbidity score e.g. Charlson Score | 9/19 studies<br><br>Benaiges 2014; Salvi 2008; Patel 2008; Mendoza 2009; Tibaldi 2009; Ricauda 2008; Carratala 2005; Leff 2005; Lau 2013                                                                                   |
| <b>Dementia</b><br>either stated in a) patient demographics or b) used as an exclusion criterion based on severity                     | a) 2/19 studies<br><br>Rodriguez-Cerillo 2009; Lau 2013<br><br>b) 8/19 studies<br><br>Mason 2007; Sun 2014; Salvi 2008; Garasen 2007; Mendoza 2009; Tibaldi 2009; Ricauda 2008; Lau 2013                                   |
| <b>Social care support</b><br>stated in inclusion/exclusion criteria                                                                   | 3/19 studies<br><br>Tibaldi 2009; Ricauda 2008; Kalra 2005;                                                                                                                                                                |
| <b>Home situation</b><br>stated in inclusion/exclusion criteria                                                                        | 7/19 studies<br><br>Benaiges 2014; Garasen 2007; Mendoza 2009; Ricauda 2008; Rodriguez-Cerillo 2009, 2013; Lau 2013                                                                                                        |
| <b>Individual coping abilities</b><br>stated in inclusion/exclusion criteria                                                           | 2/19 studies<br><br>Patel 2008; Rodriguez-Cerillo 2013                                                                                                                                                                     |

## PROSPERO International prospective register of systematic reviews

### A systematic review to identify and assess the effectiveness of hospital alternatives for people over the age of 65 who are at risk of potentially avoidable hospital admission

Alyson Huntley, Melanie Chalder, Will Hollingworth, Chris Metcalfe, Ben Davies, Sarah Purdy

#### Citation

Alyson Huntley, Melanie Chalder, Will Hollingworth, Chris Metcalfe, Ben Davies, Sarah Purdy. A systematic review to identify and assess the effectiveness of hospital alternatives for people over the age of 65 who are at risk of potentially avoidable hospital admission. PROSPERO 2015:CRD42015020371 Available from [http://www.crd.york.ac.uk/PROSPERO\\_REBRANDING/display\\_record.asp?ID=CRD42015020371](http://www.crd.york.ac.uk/PROSPERO_REBRANDING/display_record.asp?ID=CRD42015020371)

#### Review question(s)

- 1) What admission alternatives are there for older patients and do they improve patient outcomes e.g. mortality, quality of life?
- 2) What are the defining characteristics of those older patients for whom the decision to admit to hospital may be unclear?

#### Searches

MEDLINE, MEDLINE in process, EMBASE, CINAHL and the Cochrane Central Register of Controlled Trials (CENTRAL) from 2005 to April 24th 2015. The Kings Fund and AHRQ websites were also searched

#### Types of study to be included

Any type of controlled study

#### Condition or domain being studied

Any condition that may result in an avoidable hospital admission in patients over the age of 65.

#### Participants/ population

People over 65 years of age of either sex living in OECD countries who are at risk of an unplanned admission (probably for an ambulatory sensitive condition) - they will therefore not be admitted to hospital at time of recruitment but could be in community or emergency department (being assessed).

#### Intervention(s), exposure(s)

The intervention of interest is admission to hospital, using definitions developed for previous studies (Huntley et al, Family Practice Fam Pract. 2013 Jun;30(3):266-75.). However it is important to point out that admission is likely to be the control group in many relevant studies.

#### Comparator(s)/ control

Alternatives to admission (likely to be described as the intervention) including but not limited to: hospital at home, virtual ward, rapid response nursing, care at home, admission to a care home, usual care.

#### Context

Reducing emergency bed days is one of the biggest challenges currently facing the National Health Service (NHS). There is considerable pressure to reduce hospital admissions amongst older people (D'Souza, BMJ 2013). There has been a 65% increase in hospital admissions for those over 75 years of age in the last decade, and the oldest old, those over 85 years, now account for 11% of emergency admissions and 25% of bed days (NHS England 2013). There are some older people for whom care in the community is safe, perhaps with the provision of additional services and some for whom admission is required in order to deliver diagnostic or treatment techniques that are only available as an in patient. This review seeks to identify interventions for those patients that do not fall neatly into one of these categories and in doing so will assess the efficacy of the interventions and provide more detail on this patient

1  
2  
3  
4 population.

5  
6 **Outcome(s)**

7 **Primary outcomes**

8 1) Patient outcomes (including mortality, quality of life, length of stay, readmission, adverse effects of intervention)  
9 plus costs if available.

10  
11 2) Patient characteristics for whom their pathway (admission or not) is unclear including risk factors e.g. co-  
12 morbidities (mental & physical), age, gender, social circumstances, disease severity, recent admission/discharge  
13 availability of other services

14  
15 **Secondary outcomes**

16 None

17  
18 **Data extraction, (selection and coding)**

19 Standardised data extraction forms will be developed using existing guidelines (Higgins 2008 Cochrane handbook  
20 chapter 7 section 7.5). Data will be abstracted by one reviewer. A second reviewer will check data abstraction against  
21 the original paper. Data items: details on participants, Interventions, comparisons, outcome measures

22  
23 **Risk of bias (quality) assessment**

24 Cochrane risk of bias tool will be used for randomised controlled trials. CASP criteria will be used for controlled  
25 trials

26  
27 **Strategy for data synthesis**

28 Meta-analysis of data will be performed using Review Manager Version 5.1 if there are at least three trials with  
29 combinable data with a fixed or random effects model depending on the level of between trial heterogeneity estimated  
30 using the I-squared statistic. Sensitivity analysis will be performed as the data dictates.

31  
32 **Analysis of subgroups or subsets**

33 Dependent on data found

34  
35 **Dissemination plans**

36 This review is part of programme development grant.

37  
38 **Contact details for further information**

39 Dr Huntley

40 Centre of Academic Primary Care,

41 School of Social & Community Medicine

42 University of Bristol

43 Canynge Hall

44 BS8 2PS

45 alyson.huntley@bristol.ac.uk

46  
47 **Organisational affiliation of the review**

48 University of Bristol

49 www.bristol.ac.uk/primaryhealthcare/

50  
51 **Review team**

52 Dr Alyson Huntley, University of Bristol

Dr Melanie Chalder, University of Bristol  
Professor Will Hollingworth, University of Bristol  
Dr Chris Metcalfe, University of Bristol  
Dr Ben Davies, University of Bristol  
Professor Sarah Purdy, University of Bristol

#### Collaborators

Dr Ali Heawood, University of Bristol  
Mrs Helen England, BrisDoc  
Professor Jonathan Benger, University of the West of England

#### Details of any existing review of the same topic by the same authors

None

#### Anticipated or actual start date

02 February 2015

#### Anticipated completion date

29 January 2016

#### Funding sources/sponsors

NIHR Programme Development Grant RP-DG-1213-10004

#### Conflicts of interest

None known

#### Language

English

#### Country

England

#### Subject index terms status

Subject indexing assigned by CRD

#### Subject index terms

Hospitalization; Hospitals; Humans

#### Stage of review

Ongoing

#### Date of registration in PROSPERO

14 May 2015

#### Date of publication of this revision

14 May 2015

#### DOI

10.15124/CRD42015020371

#### Stage of review at time of this submission

Preliminary searches  
Piloting of the study selection process  
Formal screening of search results against eligibility criteria

#### Started

No  
No  
Yes

#### Completed

Yes  
Yes  
No



|                                   |    |    |
|-----------------------------------|----|----|
| Data extraction                   | No | No |
| Risk of bias (quality) assessment | No | No |
| Data analysis                     | No | No |

**PROSPERO**

**International prospective register of systematic reviews**

The information in this record has been provided by the named contact for this review. CRD has accepted this information in good faith and registered the review in PROSPERO. CRD bears no responsibility or liability for the content of this registration record, any associated files or external websites.

For peer review only



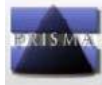

# PRISMA 2009 Checklist

| Section/topic                      | #  | Checklist item                                                                                                                                                                                                                                                                                              | Reported on page # |
|------------------------------------|----|-------------------------------------------------------------------------------------------------------------------------------------------------------------------------------------------------------------------------------------------------------------------------------------------------------------|--------------------|
| <b>TITLE</b>                       |    |                                                                                                                                                                                                                                                                                                             |                    |
| Title                              | 1  | Identify the report as a systematic review, meta-analysis, or both.                                                                                                                                                                                                                                         | Page 1             |
| <b>ABSTRACT</b>                    |    |                                                                                                                                                                                                                                                                                                             |                    |
| Structured summary                 | 2  | Provide a structured summary including, as applicable: background; objectives; data sources; study eligibility criteria, participants, and interventions; study appraisal and synthesis methods; results; limitations; conclusions and implications of key findings; systematic review registration number. | Pages 2-3          |
| <b>INTRODUCTION</b>                |    |                                                                                                                                                                                                                                                                                                             |                    |
| Rationale                          | 3  | Describe the rationale for the review in the context of what is already known.                                                                                                                                                                                                                              | Page 5             |
| Objectives                         | 4  | Provide an explicit statement of questions being addressed with reference to participants, interventions, comparisons, outcomes, and study design (PICOS).                                                                                                                                                  | Pages 5-6          |
| <b>METHODS</b>                     |    |                                                                                                                                                                                                                                                                                                             |                    |
| Protocol and registration          | 5  | Indicate if a review protocol exists, if and where it can be accessed (e.g., Web address), and, if available, provide registration information including registration number.                                                                                                                               | Page 6             |
| Eligibility criteria               | 6  | Specify study characteristics (e.g., PICOS, length of follow-up) and report characteristics (e.g., years considered, language, publication status) used as criteria for eligibility, giving rationale.                                                                                                      | Page 6             |
| Information sources                | 7  | Describe all information sources (e.g., databases with dates of coverage, contact with study authors to identify additional studies) in the search and date last searched.                                                                                                                                  | Page 6             |
| Search                             | 8  | Present full electronic search strategy for at least one database, including any limits used, such that it could be repeated.                                                                                                                                                                               | Appendix 1         |
| Study selection                    | 9  | State the process for selecting studies (i.e., screening, eligibility, included in systematic review, and, if applicable, included in the meta-analysis).                                                                                                                                                   | Pages 6-7          |
| Data collection process            | 10 | Describe method of data extraction from reports (e.g., piloted forms, independently, in duplicate) and any processes for obtaining and confirming data from investigators.                                                                                                                                  | Page 7             |
| Data items                         | 11 | List and define all variables for which data were sought (e.g., PICOS, funding sources) and any assumptions and simplifications made.                                                                                                                                                                       | Page 7             |
| Risk of bias in individual studies | 12 | Describe methods used for assessing risk of bias of individual studies (including specification of whether this was done at the study or outcome level), and how this information is to be used in any data synthesis.                                                                                      | Page 7             |
| Summary measures                   | 13 | State the principal summary measures (e.g., risk ratio, difference in means).                                                                                                                                                                                                                               | N/A                |
| Synthesis of results               | 14 | Describe the methods of handling data and combining results of studies, if done, including measures of consistency (e.g., $I^2$ ) for each meta-analysis.                                                                                                                                                   | Page 8             |

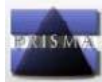

# PRISMA 2009 Checklist

| Section/topic                 | #  | Checklist item                                                                                                                                                                                           | Reported on page #                     |
|-------------------------------|----|----------------------------------------------------------------------------------------------------------------------------------------------------------------------------------------------------------|----------------------------------------|
| Risk of bias across studies   | 15 | Specify any assessment of risk of bias that may affect the cumulative evidence (e.g., publication bias, selective reporting within studies).                                                             | Page 7                                 |
| Additional analyses           | 16 | Describe methods of additional analyses (e.g., sensitivity or subgroup analyses, meta-regression), if done, indicating which were pre-specified.                                                         | n/a                                    |
| <b>RESULTS</b>                |    |                                                                                                                                                                                                          |                                        |
| Study selection               | 17 | Give numbers of studies screened, assessed for eligibility, and included in the review, with reasons for exclusions at each stage, ideally with a flow diagram.                                          | Page 8 and Figure 1                    |
| Study characteristics         | 18 | For each study, present characteristics for which data were extracted (e.g., study size, PICOS, follow-up period) and provide the citations.                                                             | Pages 8-17                             |
| Risk of bias within studies   | 19 | Present data on risk of bias of each study and, if available, any outcome level assessment (see item 12).                                                                                                | Pages 8-17 and Appendices 2 & 3        |
| Results of individual studies | 20 | For all outcomes considered (benefits or harms), present, for each study: (a) simple summary data for each intervention group (b) effect estimates and confidence intervals, ideally with a forest plot. | Pages 8-17 and Appendix 5              |
| Synthesis of results          | 21 | Present results of each meta-analysis done, including confidence intervals and measures of consistency.                                                                                                  | Pages 8-17 plus narrative presentation |
| Risk of bias across studies   | 22 | Present results of any assessment of risk of bias across studies (see Item 15).                                                                                                                          | Pages 8-17                             |
| Additional analysis           | 23 | Give results of additional analyses, if done (e.g., sensitivity or subgroup analyses, meta-regression [see Item 16]).                                                                                    | n/a                                    |
| <b>DISCUSSION</b>             |    |                                                                                                                                                                                                          |                                        |
| Summary of evidence           | 24 | Summarize the main findings including the strength of evidence for each main outcome; consider their relevance to key groups (e.g., healthcare providers, users, and policy makers).                     | Page 18                                |
| Limitations                   | 25 | Discuss limitations at study and outcome level (e.g., risk of bias), and at review-level (e.g., incomplete retrieval of identified research, reporting bias).                                            | Pages 18-19                            |
| Conclusions                   | 26 | Provide a general interpretation of the results in the context of other evidence, and implications for future research.                                                                                  | Page 19                                |
| <b>FUNDING</b>                |    |                                                                                                                                                                                                          |                                        |
| Funding                       | 27 | Describe sources of funding for the systematic review and other support (e.g., supply of data); role of funders for the systematic review.                                                               | Page 21                                |

From: Moher D, Liberati A, Tetzlaff J, Altman DG, The PRISMA Group (2009). Preferred Reporting Items for Systematic Reviews and Meta-Analyses: The PRISMA Statement. PLoS Med 6(7): e1000097. doi:10.1371/journal.pmed1000097

For peer review only - <http://bmjopen.bmj.com/site/about/guidelines.xhtml>

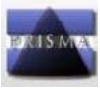

# PRISMA 2009 Checklist

For peer review only

1  
2  
3  
4  
5  
6  
7  
8  
9  
10  
11  
12  
13  
14  
15  
16  
17  
18  
19  
20  
21  
22  
23  
24  
25  
26  
27  
28  
29  
30  
31  
32  
33  
34  
35  
36  
37  
38  
39  
40  
41  
42  
43  
44  
45  
46  
47  
48  
49

# BMJ Open

**A systematic review to identify and assess the effectiveness of alternatives for people over the age of 65 who are at risk of potentially avoidable hospital admission.**

|                                 |                                                                                                                                                                                                                                                                                                                                                                                                                                                                                                                                                                                                                                                                                                                                                       |
|---------------------------------|-------------------------------------------------------------------------------------------------------------------------------------------------------------------------------------------------------------------------------------------------------------------------------------------------------------------------------------------------------------------------------------------------------------------------------------------------------------------------------------------------------------------------------------------------------------------------------------------------------------------------------------------------------------------------------------------------------------------------------------------------------|
| Journal:                        | <i>BMJ Open</i>                                                                                                                                                                                                                                                                                                                                                                                                                                                                                                                                                                                                                                                                                                                                       |
| Manuscript ID                   | bmjopen-2017-016236.R2                                                                                                                                                                                                                                                                                                                                                                                                                                                                                                                                                                                                                                                                                                                                |
| Article Type:                   | Research                                                                                                                                                                                                                                                                                                                                                                                                                                                                                                                                                                                                                                                                                                                                              |
| Date Submitted by the Author:   | 31-May-2017                                                                                                                                                                                                                                                                                                                                                                                                                                                                                                                                                                                                                                                                                                                                           |
| Complete List of Authors:       | Huntley, Alyson; University of Bristol , School of Social & Community Medicine<br>Chalder, Melanie; University of Bristol, School of Social & Community Medicine<br>Shaw, Ali; University of Bristol, School of Social & Community Medicine<br>Hollingworth, William; University of Bristol, School of Social & Community Medicine<br>Metcalf, Chris; University of Bristol, Bristol Randomised Trials Collaboration; University of Bristol , School of Social & Community medicine<br>Benger, Jonathan; The University Hospitals NHS Foundation trust, Academic Department of Emergency care; The University of the West of England, Faculty of Health & Life Sciences<br>Purdy, Sarah; University of Bristol, School of Social & Community Medicine |
| <b>Primary Subject Heading</b>: | Emergency medicine                                                                                                                                                                                                                                                                                                                                                                                                                                                                                                                                                                                                                                                                                                                                    |
| Secondary Subject Heading:      | Geriatric medicine                                                                                                                                                                                                                                                                                                                                                                                                                                                                                                                                                                                                                                                                                                                                    |
| Keywords:                       | GERIATRIC MEDICINE, Organisation of health services < HEALTH SERVICES ADMINISTRATION & MANAGEMENT, ACCIDENT & EMERGENCY MEDICINE                                                                                                                                                                                                                                                                                                                                                                                                                                                                                                                                                                                                                      |

SCHOLARONE™  
Manuscripts

31.05.17

A systematic review to identify and assess the effectiveness of alternatives for people over the age of 65 who are at risk of potentially avoidable hospital admission.

Alyson L Huntley\*  
Melanie Chalder<sup>1,2</sup>  
Alison Shaw<sup>1</sup>  
Will Hollingworth<sup>3</sup>  
Chris Metcalfe<sup>1,4</sup>  
Jonathan Benger<sup>5,6</sup>  
Sarah Purdy<sup>1</sup>

\*Corresponding author: Centre for Academic Primary Care, School of Social and Community Medicine, University of Bristol, Canynge Hall, 39 Whatley Road, Bristol BS8 2PS, UK [alyson.huntley@bristol.ac.uk](mailto:alyson.huntley@bristol.ac.uk) Tel: 0117 9287257

1. Centre for Academic Primary Care, School of Social and Community Medicine, University of Bristol, Canynge Hall, 39 Whatley Road, Bristol, BS8 2PS, UK
2. Brunelcare, Saffron Gardens, Prospect Place, Bristol, BS5 9FF, UK
3. Health Economics at Bristol, School of Social and Community Medicine University of Bristol, Canynge Hall, 39 Whatley Road, Bristol, BS8 2PS United Kingdom
4. Bristol Randomised Trials Collaboration, University of Bristol, 39 Whatley Road, Bristol, BS8 2PS, UK
5. Professor of Emergency Care, Faculty of Health and Applied Sciences, University of the West of England, Blackberry Hill, Bristol, BS16 1DD, Bristol, UK
6. Consultant in Emergency Medicine, University Hospitals Bristol NHS Foundation Trust, Marlborough Street, Bristol, BS1 3NU, UK

**Word count 4335**

**Key words:** Systematic review, emergency medical services, aged, hospitalization, hospital alternative

31.05.17

## ABSTRACT

### Background / objectives

There are some older patients who are 'at the decision margin' of admission. This systematic review sought to explore this issue with the following objective: What admission alternatives are there for older patients and are they safe, effective and cost-effective? A secondary objective was to identify the characteristics of those older patients for whom the decision to admit to hospital may be unclear.

### Design

Systematic review of controlled studies (April 2005-December 2016) with searches in Medline, Embase, Cinahl and CENTRAL databases. The protocol is registered at PROSPERO (CRD42015020371). Studies were assessed using Cochrane risk of bias criteria, and relevant reviews were assessed with the AMSTAR tool. The results are presented narratively and discussed.

### Setting

Primary and secondary health care interface.

### Participants

People aged over 65 years at risk of an unplanned admission.

### Interventions

Any community-based intervention offered as an alternative to admission to an acute hospital

### Primary and secondary outcomes measures

Reduction in secondary care use, patient-related outcomes, safety and costs.

### Results

Nineteen studies and seven systematic reviews were identified. These recruited patients with both specific conditions and mixed chronic and acute conditions. The

31.05.17

1  
2  
3 interventions involved paramedic/emergency care practitioners (n=3), emergency  
4 department-based interventions (n=3), community hospitals (n=2), and hospital-at-  
5 home services (n=11). Data suggest that alternatives to admission appear safe with  
6 potential to reduce secondary care use and length of time receiving care. There is a  
7 lack of patient-related outcomes and cost data. The important features of older  
8 patients for whom the decision to admit is uncertain are: age over 75 years, co/multi-  
9 morbidities, dementia, home situation, social support and individual coping abilities.

### 18 **Conclusions**

20 This systematic review describes and assesses evidence on alternatives to acute  
21 care for older patients and shows that many of the options available are safe and  
22 appear to reduce resource use. However, cost analyses and patient preference data  
23 are lacking.  
24  
25  
26  
27  
28  
29  
30  
31  
32  
33  
34  
35  
36  
37  
38  
39  
40  
41  
42  
43  
44  
45  
46  
47  
48  
49  
50  
51  
52  
53  
54  
55  
56  
57  
58  
59  
60

31.05.17

## STRENGTHS AND LIMITATIONS OF THIS REVIEW

1. High quality systematic review of controlled studies.
2. Some of the studies are pragmatic in approach and are at high risk of bias.

For peer review only



31.05.17

## Introduction

Reducing emergency bed days is one of the biggest challenges currently facing the National Health Service (NHS) in the United Kingdom (UK) and there is considerable pressure to reduce hospital admissions amongst older people throughout the developed world.<sup>1</sup> It has been suggested that clinicians should: 'choose to admit only those frail older people who have evidence of underlying life-threatening illness or need for surgery'.<sup>2</sup> In the UK there has been a 65% increase in hospital admissions for those over 75 years of age in the last decade. Furthermore, people over 85 years of age now account for 11% of emergency admissions and 25% of critical care bed days.<sup>3</sup> The international literature indicates that decisions to admit to an acute hospital are often influenced by inadequate knowledge of the patient or condition, communication difficulties between primary and secondary care, presence of co-morbidities, availability of test results, perceived benefits of in-patient care and patient preferences.<sup>4</sup> A review by NHS England highlighted the need to identify those frail and elderly people who need care but do not have a medical need requiring hospital admission.<sup>3</sup> It is clear that there are some older patients for whom care in the community is safe, perhaps with provision of additional services, and some for whom admission is required to deliver diagnostics or treatment that are only available in hospital. However, for those patients 'at the decision margin', the best path of action may be unclear.<sup>5</sup> The decision may be affected by non-clinical and clinical factors e.g. multi-morbidity, how much risk the patient or family are willing to accept.

Our specific objective was to conduct a systematic review to identify studies of community-based interventions aimed at reducing secondary care use in older patients with acute medical problems potentially requiring unscheduled hospital

31.05.17

admission. A secondary objective was to further confirm the characteristics of those older patients for whom the decision to admit to hospital may be unclear.

## Methods

### *Protocol and registration*

The protocol for the systematic review was registered at the PROSPERO register on 14/06/2015. Registration number is: CRD42015020371 (Supplementary material)

### *Eligibility criteria*

Publications of any randomised or non-randomised controlled trial (RCT or nRCT) which fitted our PICO criteria: a **P**opulation aged over 65 years, of either sex living in Organisation for Economic Co-operation and Development countries being considered for an unplanned admission, receiving either an **I**ntervention considered to be an alternative to acute hospital admission or acute hospital admission (**C**ontrol). The studies needed to record at least one of the following as either a primary or secondary **O**utcome: intervention effectiveness in terms of patient's subsequent ED attendance or readmission, patient-related outcomes, safety or healthcare costs.

### *Information sources and searches*

Medline, Medline In-Process, Embase, Cinahl and CENTRAL databases were searched from January 2005-April 2015 inclusive using search terms based on the eligibility criteria. (Appendix 1) An update was run in December 2016 across Medline and Medline In-Process. We included any relevant systematic reviews published 2010- 2016. The decision to time limit the searches was based on the fact that the systematic reviews would cover any older studies and that any evidence not included in these two sources was unlikely to be relevant to the fast changing

31.05.17

1  
2  
3 primary and secondary health care interface. The King's Fund and Agency for  
4  
5 Healthcare Research and Quality websites were also searched in April 2015.<sup>6,7</sup>  
6  
7  
8 References were managed using EndNote X6 software and were screened by title  
9  
10 and abstract followed by full text, both independently and in duplicate (AH, BD),  
11  
12 using predefined inclusion/exclusion criteria. Any disagreements in either stage  
13  
14 were resolved using a third reviewer (SP). The reference lists of included studies  
15  
16 were checked and forward referencing was conducted using Google Scholar.  
17  
18 Authors of included studies were contacted for details of any extra studies.  
19  
20  
21

### 22 ***Data items and collection process***

23  
24 Data from all primary studies (2005-2016) were extracted into a custom-designed  
25  
26 table. The main results and conclusions of recent high quality systematic reviews  
27  
28 (2010-2016) which included relevant primary studies were also recorded.  
29  
30  
31  
32

### 33 ***Assessment of risk of bias of individual studies (Appendix 2)***

34  
35 The Effective Practice and Organisation of Care Cochrane risk of bias tool was used  
36  
37 to critically appraise RCTs and nRCTs.<sup>8</sup>  
38  
39  
40  
41

### 42 ***Assessment of methodological quality of systematic reviews (AMSTAR)***

#### 43 ***(Appendix 3)***

44  
45  
46 The AMSTAR checklist was used to assess the quality of the included systematic  
47  
48 reviews.<sup>9</sup>  
49  
50  
51  
52  
53  
54  
55  
56  
57  
58  
59  
60

31.05.17

### ***Synthesis of results***

The data are presented narratively describing, if present, the most relevant systematic review and/or individual studies for each intervention and, where appropriate, for a specific condition.

In order to identify the characteristics of those older patients for whom the decision to admit to hospital may be unclear, the inclusion/exclusion criteria and demographics of the participants were examined and key features were tabulated alongside the number and references of relevant studies.

1  
2  
3  
4  
5  
6  
7  
8  
9  
10  
11  
12  
13  
14  
15  
16  
17  
18  
19  
20  
21  
22  
23  
24  
25  
26  
27  
28  
29  
30  
31  
32  
33  
34  
35  
36  
37  
38  
39  
40  
41  
42  
43  
44  
45  
46  
47  
48  
49

31.05.17

**Summary Table: RCT/nRCT and systematic evidence for alternative to admissions for the older population**

| Intervention/<br>setting                                                                                                                 | Paramedic/<br>emergency care<br>practitioner                                                                                                                                                                                                                                                                                      | Emergency department                                                                                                                                                                                                                                                                                   | Community hospital                                                                                                                                                                                                                                                               | Hospital at home<br>Heart Failure                                                                                                                                                                                                   | Hospital at home<br>COPD                                                                                                                                                                                                                      | Hospital at home<br>Pulmonary embolism                                                                                                                                                         | Hospital at home<br>Pneumonia                                                                                                                                                                                                                                                 | Hospital at home<br>Stroke                                                                                                                                                                               | Hospital at home<br>Uncomplicated<br>diverticulitis                                                                     | Hospital at home<br>Older population with acute<br>medical problems                                                                                                                                                                                                                                                                                                                                                        |
|------------------------------------------------------------------------------------------------------------------------------------------|-----------------------------------------------------------------------------------------------------------------------------------------------------------------------------------------------------------------------------------------------------------------------------------------------------------------------------------|--------------------------------------------------------------------------------------------------------------------------------------------------------------------------------------------------------------------------------------------------------------------------------------------------------|----------------------------------------------------------------------------------------------------------------------------------------------------------------------------------------------------------------------------------------------------------------------------------|-------------------------------------------------------------------------------------------------------------------------------------------------------------------------------------------------------------------------------------|-----------------------------------------------------------------------------------------------------------------------------------------------------------------------------------------------------------------------------------------------|------------------------------------------------------------------------------------------------------------------------------------------------------------------------------------------------|-------------------------------------------------------------------------------------------------------------------------------------------------------------------------------------------------------------------------------------------------------------------------------|----------------------------------------------------------------------------------------------------------------------------------------------------------------------------------------------------------|-------------------------------------------------------------------------------------------------------------------------|----------------------------------------------------------------------------------------------------------------------------------------------------------------------------------------------------------------------------------------------------------------------------------------------------------------------------------------------------------------------------------------------------------------------------|
| <b>Primary studies identified</b><br><br>19 studies over 24 papers<br>n=10 RCT, n=9 nRCT                                                 | n=3<br>(RCT & 2 nRCT)<br>Mason 2007<br>Gray 2008<br>Mason 2012                                                                                                                                                                                                                                                                    | n=3<br>(RCT & 2 nRCT)<br>Sun 2014<br>Benaiges 2014<br>Salvi 2008                                                                                                                                                                                                                                       | n=2 RCT<br>Vicente 2014<br>Garåsen 2007,<br>2008ab                                                                                                                                                                                                                               | n=3 RCT<br>Mendoza<br>2009/García-<br>Soleto 2013<br>Tibaldi 2009<br>Patel 2008                                                                                                                                                     | n=1 RCT<br>Ricauda 2008                                                                                                                                                                                                                       | n=1 nRCT<br>Rodriguez-Cerillo<br>2009                                                                                                                                                          | n=1 RCT<br>Carratala 2005                                                                                                                                                                                                                                                     | n=1 RCT<br>(3 arm)<br>Kalra 2005                                                                                                                                                                         | n=1 nRCT<br>Rodriguez-Cerrillo 2013                                                                                     | n=3 nRCT<br>Leff 2005/2009/Frick 2009<br>Crilly 2011<br>Lau 2013                                                                                                                                                                                                                                                                                                                                                           |
| <b>Main conclusions of primary studies</b><br><br>Statistically significant differences between alternative care and acute hospital care | Mason RCT<br><b>Reduction:</b><br>Risk of ED attendance,<br>Risk of hospital readmission.<br><b>Increase:</b> Satisfaction with care<br>Mean duration of care<br>Subsequent unplanned contacts with secondary care<br><b>Comparable:</b><br>Mortality<br><br>Two nRCTs report greater reduction in admissions<br><br>No cost data | Sun RCT<br><b>Reduction:</b><br>Time of episode of care<br>Less likely to be admitted into hospital<br>Costs<br><b>Comparable:</b><br>Serious events<br>QoL<br>Satisfaction with care<br>*****<br>Benaiges nRCT<br><b>Reduction:</b><br>Readmissions<br>Costs<br>*****<br>Salvi nRCT<br>no differences | Vicente<br>Data limited. Neither formal analyses nor cost data presented.<br>*****<br>Garåsen<br><b>Reduction:</b><br>Hospital readmissions<br>Receiving any care at 26 wks<br>Deaths<br>Total costs & mean costs per patient<br><b>Increase:</b><br>Observation period<br>***** | Meta-analysis in systematic review                                                                                                                                                                                                  | <b>Reduction:</b><br>Readmissions<br>Mean cost per patient<br><b>Increase:</b><br>Length of stay.<br><b>Comparable:</b><br>Depression<br>QoL<br>Mortality                                                                                     | <b>Comparable:</b><br>Mean length of stay<br>No major bleeding, thrombosis or death in either group<br>No cost data                                                                            | <b>Increase:</b><br>Patients were satisfied with care<br><b>Comparable:</b><br>An overall 'successful outcome'<br>Readmissions<br>QoL<br>Adverse drug reactions<br>Medical complications<br>Mortality<br><br>No cost data                                                     | <b>Increase:</b><br>Mortality & institutionalisation<br><br><b>Reduction:</b> QoL scores basic activities of daily living<br><br>Costs were lower for HaH group but eclipsed by poorer patient outcomes. | Limited data.<br><b>Reduction:</b><br>Cost reduction of €1368 per patient.<br><b>Comparable:</b><br>Mean length of stay | Leff<br><b>Reduction:</b><br>Length of stay<br>Mean treatment cost<br><b>Comparable:</b><br>Use of health services<br>ED visits or readmission<br>*****<br>Crilly<br><b>Increase:</b><br>Longer time in ED<br><b>Comparable:</b><br>Length of episode of total care<br>No mortality or cost data<br>*****<br>Lau<br><b>Reduction:</b><br>Length of stay<br><b>Comparable:</b><br>Mortality<br>Readmissions<br>No cost data |
| <b>Systematic review identified</b>                                                                                                      | NO                                                                                                                                                                                                                                                                                                                                | NO                                                                                                                                                                                                                                                                                                     | NO                                                                                                                                                                                                                                                                               | Quaddoura 2015                                                                                                                                                                                                                      | Jeppesen 2012                                                                                                                                                                                                                                 | Vinson 2012                                                                                                                                                                                    | Chalmers 2011                                                                                                                                                                                                                                                                 | Shepperd 2016<br>Chalmers 2011                                                                                                                                                                           | Varney 2014                                                                                                             | NO                                                                                                                                                                                                                                                                                                                                                                                                                         |
| <b>Description of, and main conclusions of systematic review</b>                                                                         |                                                                                                                                                                                                                                                                                                                                   |                                                                                                                                                                                                                                                                                                        |                                                                                                                                                                                                                                                                                  | 3 RCTs as above used in meta-analysis<br><b>Increase:</b><br>Time to first readmission<br>HQoL at 6 & 12 mths<br><b>Reduction:</b><br>Costs for index treatment<br><b>Comparable:</b><br>Rate of readmission<br>All-cause mortality | 8 RCTs 7 did not fit inclusion criteria plus RCT detailed above.<br><b>Review summary:</b><br>Selected COPD patients can be safely & successfully treated at home.<br>Favourable readmission rates.<br>A trend towards reduced mortality rate | 7 observation studies plus one nRCT detailed above.<br><b>Review summary:</b><br>Data are limited, but evidence supports the feasibility & safety of for carefully selected low risk patients. | 5 studies comprising variety of designs plus one RCT detailed above.<br><b>Review summary:</b><br>Interventions appear safe.<br>Comparable for mortality, hospital readmissions patient satisfaction.<br>Insufficient data for quality of life or return to usual activities. | Two previous systematic reviews on a mixture of conditions including one RCT described above                                                                                                             | Integrative review on admission-avoidance HaH services and included one nRCT described above                            |                                                                                                                                                                                                                                                                                                                                                                                                                            |

31.05.17

## Results

The systematic review identified four types of intervention from across 19 studies published in 24 papers: paramedic/emergency care practitioners (n=3), emergency department (ED) interventions (n=3), community hospitals (n=2), hospital-at-home services (n=11).<sup>10-33</sup> (PRISMA diagram) (Appendix 4) Ten of the included studies were RCTs and nine were nRCTs. (Summary table) Fifteen studies were conducted in western European countries of which four were in the UK. Two studies were conducted in Australia and two studies in the United States (US). Risk of bias, general intervention description, AMSTAR and study data are detailed in the appendices. (Appendix 1) (Appendix 2)(Appendix 3) (Appendix 4)(Appendix 5)

There was an obvious divide between risk of bias of RCTs and nRCTs with the RCTs generally at low risk for most domains although for some domains there was insufficient information to be make a judgement (Appendix 2). The nRCTs were at high risk from not being randomised and in some studies there was a suggestion of health professional choice in allocation and as, with the RCTs, information was sometimes lacking. Risk of bias of individual studies is detailed below in the relevant section.

The AMSTAR ratings of the systematic reviews was generally good although some reviews did not list details of excluded studies, included studies of high risk of bias and did not perform publication bias analysis. (Appendix 3)

### ***Paramedic practitioner/emergency care practitioner (PP/ECP) interventions (Appendix 4)***

Three studies were identified<sup>10-12</sup> and no relevant recent systematic reviews.

31.05.17

1  
2  
3 A cluster RCT (Mason 2007), compared PPs with additional training (n=1469) with  
4 standard PPs (n=1549) in assessing and treating elderly people following 999 calls  
5 with the aim of measuring subsequent emergency care.<sup>10</sup> Similarly, two more recent  
6  
7  
8  
9  
10 nRCT investigated the role of ECPs in avoiding ED) attendance/admissions in  
11 elderly populations.<sup>11, 12</sup> Gray 2008 was a case-series study of ECP attendances for  
12 elderly patients aged over 65 years with a fall (n=233) compared with historical  
13 controls (n=772), and Mason 2012 was a cluster controlled study of enhanced ECP  
14 care for five care homes (n=256) compared with standard care in five other care  
15 homes (n=201). Risk of bias was low for all the domains of the cluster RCT and both  
16  
17  
18  
19  
20  
21  
22  
23 of the nRCT were at high risk due to lack of randomisation.

24  
25 In the cluster RCT, all primary outcomes comparing the intervention with the control  
26 group were improved: relative risk of ED attendance within 28 days (RR 0.72 (0.68,  
27 0.75)), relative risk of hospital admission within 28 days (RR 0.87 (0.81, 0.94)), being  
28 very satisfied with care (RR 1.16 (1.09, 1.23)) and mean total episode duration in  
29 hours (-42.2 (-59.5,-25.0)) with a reported p<0.001 for all.<sup>10</sup> The secondary outcome  
30 of mortality was comparable between groups, but intervention patients had a greater  
31 number of subsequent unplanned contacts with secondary care at 28 days (330 vs.  
32 259 p<0.01).

33  
34  
35  
36  
37  
38  
39  
40  
41  
42 The two nRCTs reported a greater reduction in admissions when comparing the  
43 intervention with normal ECP practice but these results are of limited use due to the  
44 high risk of bias of the studies.<sup>11, 12</sup>

45  
46  
47  
48  
49 None of the studies of PP/ECP interventions provided details of cost data or cost-  
50 effectiveness analysis.  
51  
52  
53  
54  
55  
56  
57  
58  
59  
60

31.05.17

**Emergency department (ED) interventions (Appendix 4)**

The searches identified one RCT (Sun 2014) which was assessed to be at low risk of bias, and two nRCT (Benaiges 2014, Salvi 2008) in which the risk of bias was high for several domains including randomisation.<sup>13-15</sup> No relevant, recent systematic reviews were identified.

Sun and colleagues conducted a RCT in which patients attending ED with syncope were randomised to receive either a syncope protocol in an observation unit (n=62) or usual care (n=62).<sup>13</sup> where the maximum stay in the observation unit could not exceed than 24 hours.

In terms of primary outcomes, patients randomised to the intervention spent less time in hospital at the index visit (29 vs. 47 hours p<0.001) and were less likely to be admitted to hospital (RR 0.16 (95% CI 0.09, 0.29) p<0.001). There were no differences in the secondary outcomes of serious events, quality of life (QoL) or satisfaction with care between groups. A reduction in costs was reported but no formal statistical comparison was performed (index visit US\$1400 vs. 2420, 30 days US\$1800 vs.2520 (2011 data)).

The first of the two nRCT compared usual care with treatment in a 'day hospital' for hyperglycaemic crisis from which the main result was improved readmission rates and associated costs (Benaiges 2014), whilst the second nRCT compared a specialist geriatric ED intervention with a standard ED procedure (Salvi 2008) but without evidence of any differences in outcome and had significant differences in baseline demographic data.<sup>14,15</sup>



31.05.17

**Community hospital (CH) interventions** (Appendix 4)

Two RCTs were identified describing a community hospital (CH) intervention as an alternative to acute hospital (AH) care<sup>16-19</sup> and no relevant, recent systematic reviews.

Both RCTs were at low risk of bias overall. In the RCT by Vicente, participants were randomised following triage at home to either go to a CH (n=410) or to the ED (n=396).<sup>16</sup> The data presented were limited. The authors reported that the nurse attending the patient at home sent 90 intervention participants to the CH (primary outcome) although six of those individuals were subsequently transferred from the CH to the ED (secondary outcome). There were no formal statistical analyses nor were cost data presented.

The Garåsen RCT compared CH care (n=72) to AH care (n=72) and was published over three separate papers.<sup>17-19</sup> There was no distinction between primary and secondary outcomes. At 26 weeks, there were fewer readmissions in the CH group versus the AH group (19% vs. 36%, p=0.02) and more people receiving no care (25% vs. 10%, p=0.01). At 12 months, there were fewer deaths in the CH group (18% vs. 31%, p=0.03) although the observation period was considerably longer in the CH group (335.7 vs. 292.8 days, p=0.01). Total cost of treatment was less in the CH group compared with those receiving AH care NOK 39,650 ((95% CI kr 30 996-48,304) versus NOK 73,417 (95% CI NOK 52 992-93,843)) data collected 2003-2005 (p = 0.002). Average health services costs per patient/day for the entire observation period was NOK 606 (95% CI £ 450- 761) in the CH group compared to NOK 802 (95% CI NOK 641-962) in the AH group (p = 0.026).

31.05.17

#### ***Hospital-at-Home (HaH) interventions (Appendix 4)***

Eight of the HaH studies were focused on specific conditions: heart failure (n=3), chronic obstructive pulmonary disease (n=1), pulmonary embolism (n=1), pneumonia (n=1), stroke (n=1), and uncomplicated diverticulitis (n=1).<sup>20-28</sup> The remaining three HaH studies recruited older participants with a range of conditions, and two of these recruited from residential homes.<sup>29-33</sup> All the specific condition studies were included in recent (2010-2016) systematic reviews<sup>34-40</sup> but no relevant reviews for the older participants with a range of conditions were identified.

#### ***Heart failure (HF)***

Three RCTs were identified on HaH for HF and their results published in four separate papers.<sup>20-23</sup> These studies were included in two previous reviews of HaH one which focused on HF (Quaddoura 2015).<sup>34,35</sup> This review used the Cochrane risk of bias tool and described the overall quality of the RCTs as modest. The AMSTAR rating of the review highlighted a lack of description of excluded studies and the combination of different QoL measures in meta-analysis.

In the Quaddoura systematic review the patients were randomised to either HaH or AH within the ED and the primary outcomes of the review were hospital readmissions and mortality. HaH increased time to first readmission (mean difference (MD) 14.13 days [95% CI 10.36, 17.91] p=0.015 using data from two RCTs (n=132).<sup>22-23</sup> although there was no strong evidence of an effect on the rate of readmission (RR 0.68 [0.42, 1.09]) using data from two RCTs (n=172).<sup>20,22</sup> This is a sizeable reduction, but consistent with chance in a data set of this size. An improvement was reported in health-related QoL at both 6 and 12 months

31.05.17

(standardized MD (SMD) -0.31 [-0.45 to -0.18]; SMD -0.17 [-0.31 to -0.02] respectively). HaH was comparable to AH care on all-cause mortality (RR 0.94 (0.67, 1.32)) using data from all three RCTs. These studies also showed a significant reduction in costs for the index treatment period ( $p < 0.001$ ). Two trials<sup>20,23</sup> reported lower costs in the HaH group at 12 months, although the difference was not statistically significant in one of the studies.<sup>20</sup> When the authors of this particular review calculated total costs for these two trials, both indicated a cost reduction for HaH compared to AH care.

### *Chronic obstructive pulmonary disease (COPD)*

An RCT by Ricauda was published in 2008 and was also included in two recent systematic reviews - one focusing on COPD and one more generally on HaH.<sup>24,35,36</sup> The high quality COPD review included eight RCTs, one of which described HaH in an early discharge setting, plus the Ricauda trial and six which were published prior to our 2005 inclusion date.

The Ricauda RCT compared HaH (n=52) with AH (n=52) and was conducted with low risk of bias. The primary outcomes were hospital readmission and mortality rates at 6 months. The secondary outcomes included a range of depression, functional, cognitive and nutritional measures as well as costs.

The study showed that there were fewer hospital readmissions for HaH patients compared to AH patients at 6 months (42% vs 87%,  $p = 0.001$ ) although HaH patients had a longer length of stay than those in the AH group (15.5 SD $\pm$ 9.5 vs 11.0  $\pm$ SD 7.9 days,  $p = 0.01$ ). Whilst HaH patients experienced improvements in depression and QoL scores during the study, there was no evidence of difference between the two

31.05.17

1  
2  
3 groups for these outcomes at 6 months. Cumulative mortality at 6 months was  
4  
5 comparable between groups (20.2%).  
6  
7

8 All patients discharged from HaH completed the care programme at home, whereas  
9  
10 11.5% of AH patients continued their care in a long-term facility after hospital  
11  
12 discharge, with an average daily cost of \$174.7 for a mean period of 25 ±8.7 days.  
13  
14 Overall - on a cost per patient per day basis - HaH care was less expensive than that  
15  
16 given to the AH group (\$101.4 ± 61.3 vs \$151.7 ±96.4, p=0.002). This RCT reflected  
17  
18 the results of the published systematic review.<sup>36</sup>  
19  
20  
21  
22  
23

### 24 *Pulmonary embolism*

25  
26 Our review identified one published nRCT of HaH (Rodriguez-Cerillo 2009) for  
27  
28 patients with pulmonary embolism which was also included in a recent systematic  
29  
30 review with seven other observational studies (Vinson 2012).<sup>25,37</sup> The high quality  
31  
32 review concluded that the overall incidence of mortality at 90 days was very low.  
33  
34  
35  
36

37 The nRCT compared HaH (n=30) with AH (n=31) and was at high risk of bias  
38  
39 overall.<sup>25</sup> No distinctions between primary and secondary outcomes were made.  
40  
41 Mean length of stay was not statistically different comparing HaH with the AH group  
42  
43 (8.9 days (7–14 days) vs. 10.6 days (6–20 days)). No patients treated at home  
44  
45 required unexpected return to hospital during admission. There was no major  
46  
47 bleeding, thrombosis or death in either group at 90 days in the nRCT.<sup>25</sup> There were  
48  
49 no cost data reported.  
50  
51  
52  
53  
54  
55  
56  
57  
58  
59  
60

31.05.17

### *Pneumonia*

Our review identified one RCT (Carratala 2005) published and included in a recent systematic review (Chalmers 2011) which also described a further five studies comprising a variety of designs).<sup>26,38</sup> The RCT compared HAH (n=110) with AH (n=114) and was at low risk of bias. The primary outcome was the percentage of patients with an 'overall successful outcome' according to seven predefined criteria<sup>26</sup> whilst secondary outcomes were patients' QoL and satisfaction.

An overall successful outcome was achieved in 83.6% of HaH patients and 80.7% of AH patients (absolute difference 2.9% [95% CI, 7.1-12.9]). Subsequent hospital admissions were comparable between groups (6.3 vs. 7.0%). More HaH patients were satisfied with their overall care (91.2 vs. 79.1%; ab 12.1% [CI, 1.8 to 22.5%]). Reported QoL scores were comparable between groups as was the percentage of patients with adverse drug reactions (9.1 vs. 9.6%), medical complications (0.9 vs. 2.6%), and overall mortality (0.9 vs. 0%) for HAH and AH patient groups respectively. There were no cost data presented. This RCT data reflects the result of the systematic review by Chalmers 2011.<sup>38</sup>

### *Stroke*

One RCT on HaH for stroke patients (Kalra 2005) was published and also included in two previous systematic reviews.<sup>27,35,39</sup> This RCT was at low risk of bias. The primary outcome measure was death or institutionalisation at one year. This three-arm study randomised patients into care on a stroke unit (SU) (n=152), care in a general ward (GW) with stroke expert advice (n=152) and HaH with stroke expert advice (n=153) within 72 hours after recruitment in the ED department.

31.05.17

1  
2  
3 Mortality and institutionalisation at one year were lower in the SU group compared  
4 with either the GW (14 vs. 30%,  $p < 0.001$ ) or HaH groups (14 vs. 24%,  $p=0.03$ ).  
5  
6 Significantly fewer patients cared for on the SU died compared with those in the GW  
7 group (9 vs. 23%,  $p = 0.001$ ). The SU group showed greater improvement on basic  
8 activities of daily living compared with the other two groups (change in Barthel Index  
9 10 vs. 7,  $p < 0.002$ ). QoL at three months was significantly better in SU and HaH  
10 patients. There was greater dissatisfaction with care in the GW group compared with  
11 SU or HaH groups. The total costs of stroke care per patient over 12 months (data  
12 collected 2005-2008) were £11,450 for the SU group, £9527 for GW group and  
13 £6840 for HaH group.  
14  
15  
16  
17  
18  
19  
20  
21  
22  
23  
24  
25

#### 26 *Uncomplicated diverticulitis*

27  
28 Our systematic review found one nRCT (Rodriguez-Cerrillo 2013).<sup>28</sup> This study was  
29 also included in a recent, moderate quality integrative review on admission-  
30 avoidance HaH services.<sup>40</sup> This nRCT compared HaH (n=34) with AH (n=18) for  
31 patients with uncomplicated diverticulitis and was, overall, at high risk of bias with no  
32 defined primary or secondary outcomes were defined. No statistical detail was  
33 provided about any of the data presented. None of the patients treated at home were  
34 transferred to the acute hospital. The mean length of stay in the intervention group  
35 was 9 days, compared with 10 days in AH. HaH treatment was associated with a  
36 cost reduction of €1368 per patient.  
37  
38  
39  
40  
41  
42  
43  
44  
45  
46  
47  
48  
49

#### 50 *Older population with acute medical problems*

51  
52 There were three studies identified published over five papers<sup>29-33</sup> and no relevant  
53 recent systematic reviews. One nRCT recruited acutely ill older persons and was  
54 published across three separate papers (Leff 2005, main publication).<sup>29-31</sup> This nRCT  
55  
56  
57  
58  
59  
60

31.05.17

1  
2  
3 compared HaH (n=169) with AH (n=286) with the majority of patients being identified  
4  
5 the morning after admission. The study was at high risk of bias.<sup>29</sup> There was no  
6  
7 distinction made between primary and secondary outcomes. Patients treated with  
8  
9 HaH had a shorter length of stay compared with those given AH care (3.2 vs. 4.9  
10  
11 days, p =0.004). The mean treatment cost was lower for HaH care than for acute  
12  
13 hospital care (\$5081 vs. \$7480, p< 0.001). Eight weeks after admission, there were  
14  
15 no differences in the use of health services between HaH and AH patients in terms  
16  
17 of ED visits, (0.23 (SD 0.66) 0.22 (SD 0.57)) or readmission (0.28 (SD 0.59) 0.27  
18  
19 (SD 0.55)).  
20  
21  
22  
23

24  
25 The nRCT by Crilly 2010 recruited elderly nursing home patients presenting at ED  
26  
27 but who were willing to receive care back in their nursing home (n=62) and  
28  
29 compared these with historical control care home patients who had been  
30  
31 hospitalised (n=115). The study was at high risk of bias<sup>32</sup> and no primary outcomes  
32  
33 were specified. Intervention participants experienced a longer time in ED than those  
34  
35 who had been admitted into hospital (9.94 vs. 7.01 hours p=0.005) but required less  
36  
37 time being subsequently cared for (2.19 vs. 6.2 days p<0.001). Overall, the length of  
38  
39 an episode of care in days (9.56 (1.26) vs. 6.20 (0.59) days, p=0.14) and the number  
40  
41 of readmissions within 28 days (11.3 vs. 11.3, p=0.99) were not statistically different  
42  
43 between the two groups. There were no mortality or cost data presented.  
44  
45  
46  
47

48  
49 The nRCT by Lau 2013 assessed residents of a care home presenting at ED who  
50  
51 were subsequently treated back in their care home (n=95) and compared data with  
52  
53 historical hospital controls i.e. not from care homes (n=167).<sup>33</sup> No primary outcomes  
54  
55 were specified and the study was at high risk of bias. Length of stay was significantly  
56  
57 shorter for those in the intervention group compared with the controls (2.0 vs. 11.0  
58  
59  
60

31.05.17

1  
2  
3 days  $p < 0.001$ ) although mortality (11 (11.6%) vs. 20 (12.0%),  $p = 0.924$ ) and  
4  
5 readmission rates (39 (41.1%) vs. 68 (40.7%),  $p = 0.963$ ) at 6 months were  
6  
7 comparable between groups. There were no cost data presented.  
8  
9

10  
11 ***Characteristics of those older patients for whom the decision to admit to***  
12  
13 ***hospital may be unclear (Appendix 6)***  
14

15  
16 Fifteen of the studies included in our systematic review recruited a population with a  
17  
18 mean age of more than 75 years, despite the inclusion criterion specifying those over  
19  
20 65 years. Whilst 9/19 studies specifically stated their recruited population was multi-  
21  
22 morbid, it is plausible that all the study populations were and so this is very likely to  
23  
24 be a factor which impacts on decision-making in acute medical care. Eight studies  
25  
26 specified a particular degree of severity for dementia as an inclusion criterion but, in  
27  
28 practice, this is a difficult assessment to make in the acute care context. There were  
29  
30 inclusion/exclusion criteria in nine of the studies which specified the importance  
31  
32 taking account of an individual's home situation, social support networks and coping  
33  
34 abilities as part of the decision-making process.  
35  
36  
37  
38  
39  
40  
41  
42  
43  
44  
45  
46  
47  
48  
49  
50  
51  
52  
53  
54  
55  
56  
57  
58  
59  
60



31.05.17

## Discussion

### *Summary of principal findings*

The findings of our systematic review show that alternatives to acute hospital care at the point of potential admission for people aged over 65 years can be safe, with comparable mortality and clinical outcomes across a range of acute and chronic conditions. They also have the potential to reduce healthcare spending. The exception to the evidence of benefit of HaH is the treatment of stroke patients, who fare much worse with HaH intervention compared to treatment in a stroke unit. The authors of this study suggest that these differences are due to the overall expertise available in the stroke unit as opposed to care given by generic hospital or homecare staff advised by specialised stroke health professionals. It is recommended therefore that in most cases, in line with current NHS practice for stroke, care should to be provided in specialist units.<sup>41</sup> The key features of older patients for whom the decision to admit may be uncertain are age more than 75 years, co/multi-morbidities, dementia, home situation, social support and individual coping abilities.

### *Comparison with previous literature*

As part of our systematic review, any relevant systematic review published in 2010-2016 was included and referred to when discussing the more recent studies. All of these reviews were on the topic of HaH interventions. In addition to being older evidence, some of the previous reviews in contrast to our own included a number of uncontrolled observational studies. Some also included studies in which HaH interventions were applied in the non-emergency or post-discharge settings. By contrast, our systematic review focuses on bringing together controlled studies on

31.05.17

1  
2  
3 alternatives to acute hospitalisation at the point of potential admission for the over  
4  
5 65s.

6  
7  
8 *Clinical and research implications*

9  
10 For health professionals, making a decision to admit an older patient can prove very  
11  
12 difficult. Decision-making for each individual patient draws upon a range of  
13  
14 professional experience and expertise, and should also be influenced by broader  
15  
16 factors such as living conditions and individual/family/carer coping, in addition to care  
17  
18 preferences. If alternatives to acute admission are available, health professionals  
19  
20 must be confident about using these alternative pathways for their patients<sup>5</sup> and  
21  
22 whilst many of the interventions in this review may provide viable alternatives to  
23  
24 acute care, they may not exist in some healthcare communities or geographical  
25  
26 regions. Nevertheless, our review suggests that where established alternatives to  
27  
28 admission exist, clinicians should offer these with a degree of confidence and not  
29  
30 assume that hospital admission is always the best or safest option for their patient.  
31  
32

33  
34 Future research should aim to provide more comprehensive evidence of both the  
35  
36 clinical and cost effectiveness of a wider range of hospital alternatives for a greater  
37  
38 range of health issues, as well as exploring in more detail the determinants and  
39  
40 outcomes of decision-making under conditions of uncertainty. Many of the studies  
41  
42 included in this review recruited highly defined populations and it would be helpful to  
43  
44 understand whether the findings can be replicated in more general patient groups.  
45  
46 There is also much to be done to improve the collection of data on patient-related  
47  
48 outcomes, carer and health professional acceptability, and costs.  
49  
50

51  
52  
53 *Strengths and limitations of review*

54  
55 Our systematic review was conducted to high methodological standards.<sup>42</sup> The  
56  
57 majority of evidence presented is based on HaH services, although this includes  
58  
59  
60

31.05.17

1  
2  
3 treatment of a wide range of conditions. Whilst not all the included studies were  
4  
5 randomised or considered to be at low risk of bias, these issues are clearly  
6  
7 highlighted and the included studies cover a variety of alternative approaches to  
8  
9 hospital admission. The majority of the included studies offer little or no cost data  
10  
11 which makes it difficult to assess the cost-effectiveness of any these alternatives to  
12  
13 acute hospital care. Whilst writing our protocol we planned to carry out a meta-  
14  
15 analysis on suitable data. However, the data we identified were insufficient, in terms  
16  
17 of quantity (i.e. often drawn from a single study), quality (i.e. from nRCT) or  
18  
19 homogeneity. Where sufficient data were identified - on HaH for heart failure – an  
20  
21 analysis had already been conducted within a previous review.<sup>34</sup>  
22  
23  
24  
25

26 In conclusion, this systematic review describes and assesses evidence on  
27  
28 alternatives to acute care for older patients and shows that many of the options  
29  
30 available are safe and appear to reduce resource use.  
31  
32  
33  
34  
35  
36  
37  
38  
39  
40  
41  
42  
43  
44  
45  
46  
47  
48  
49  
50  
51  
52  
53  
54  
55  
56  
57  
58  
59  
60

31.05.17

### **Funding statement**

This paper presents research funded by the National Institute for Health Research (NIHR) as part of their Programme Development Grant scheme (RP-DG-1213-10004). The views expressed are those of the authors and not necessarily those of the NHS, the NIHR or the Department of Health.

### **Competing interests**

None of the authors have any competing interests to declare

### **Acknowledgements**

Ben Davies (BD) of the Centre for Academic Primary Care, School of Social and Community Medicine at the University of Bristol for providing systematic review support to AH.

Helen England, formerly of Bris-DOC, for providing advice to SP and the wider study team.

Sue Jenkins, lay representative, who co-led a PPI session with MC exploring the relevance of the study findings with a group of older lay representatives including Alma Brooks, Matt Pepper, Joan Pepper, Tom Doyle, and Liz Banks-Jones.

31.05.17

### Authors' contribution

**ALH** Research Fellow and lead systematic reviewer conducting all stages of the review and responsible for the initial draft of paper.

**MC** Research Fellow with specific expertise in Patient and Public Involvement (PPI) as well as older age community care. Contributing to discussion as the review progressed. Commenting and editing on the drafts of the paper.

**AH** Senior Research Fellow with specific expertise in patient-related outcomes. Contributing to discussion as the review progressed. Commenting and editing on the drafts of the paper.

**WH** Professor with specific expertise in health economics. Contributing to discussion as the review progressed. Commenting and editing on the drafts of the paper.

**CM** Reader with specific expertise in trial design and statistical analysis. Contributing to discussion as the review progressed. Commenting and editing on the drafts of the paper.

**JB** Professor with specific expertise in emergency care. Contributing to discussion as the review progressed. Commenting and editing on the drafts of the paper.

**SP** Principal Investigator and Professor with specific expertise in primary health care. Third reviewer of data. Commenting and editing on the drafts of the paper.

### Data sharing statement

This is a systematic review and all the data we have collected is either in the main text and summary table or in the on-line appendices.

31.05.17

**References**

1. D'Souza S, Guptha S. Preventing admission of older people to hospital. *BMJ* 2013 May 20; 346: f3186
2. Philp I. Community services. Reasons for redesigning care for older people. *Health Serv J* 2012; 122(6331):30-2.
3. NHS England, 2013. Bed availability and occupancy accessed at: <https://www.england.nhs.uk/statistics/statistical-work-areas/bed-availability-and-occupancy/> on 20/12/16
4. Hammond CL, Pinnington LL, Phillips MF. A qualitative examination of inappropriate hospital admissions and lengths of stay. *BMC Health Serv Res* 2009; 9:44.
5. Walsh B, Lattimer V, Wintrup J *et al*. Professional perspectives on systemic barriers to admission avoidance: learning from a system dynamics study of older people's admission pathways. *Internat J Older People Nursing* 2015; 10(2):105-14.
6. The King's Fund, accessed at: <https://www.kingsfund.org.uk/> on the 18/01/2017
7. AHRQ, accessed at: <http://www.ahrq.gov/> on the 18/01/2017
8. EPOC risk of bias criteria accessed at: <http://epoc.cochrane.org/sites/epoc.cochrane.org/files/public/uploads/Suggested%20risk%20of%20bias%20criteria%20for%20EPOC%20reviews.pdf> on 18/01/17
9. Shea BJ, Grimshaw JM, Wells GA *et al*. Development of AMSTAR: a measurement tool to assess the methodological quality of systematic reviews. *BMC Med Res Methodol* 2007; 7:10.
10. Mason S, Knowles E, Colwell B *et al*. Effectiveness of paramedic practitioners in attending 999 calls from elderly people in the community a cluster randomised controlled trial. *BMJ* 2007 Nov 3; 335(7626):919.
11. Gray JT, Walker A. Avoiding admissions from the ambulance service: a review of elderly patients with falls and patients with breathing difficulties seen by Emergency Care Practitioners in South Yorkshire. *Emerg Med J* 2008; 25(3):168-71.

31.05.17

12. Mason S, O'Keeffe C, Knowles E *et al*. A pragmatic quasi experimental multi-site community intervention trial evaluating the impact of Emergency Care Practitioners in different UK health settings on patient pathways (NEECaP Trial. *Emerg Med J* 2012; 29(1):47-53.
13. Sun BC, McCreath H, Liang LJ *et al*. Randomized clinical trial of an emergency department observation syncope protocol versus routine inpatient admission. *Ann Emerg Med* 2014; 64(2):167-75.
14. Benaiges D, Chillarón JJ, Carrera MJ *et al*. Efficacy of treatment for hyperglycemic crisis in elderly diabetic patients in a day hospital. *Clin Interv Aging* 2014; 9:843-9.
15. Salvi F, Morichi V, Grilli A *et al*. A geriatric emergency service for acutely ill elderly patients: pattern of use and comparison with a conventional Emergency Department in Italy. *J Am Geriatr Soc*. 2008 56(11):2131-8.
16. Vicente V, Svensson L, Wireklint Sundström B *et al*. Randomized controlled trial of a prehospital decision system by emergency medical services to ensure optimal treatment for older adults in Sweden. *J Am Geriatr Soc* 2014; 62(7):1281-7
17. Garåsen H, Windspoll R, Johnsen R. Intermediate care at a community hospital as an alternative to prolonged general hospital care for elderly patients: a randomised controlled trial. *BMC Public Health* 2007 May 2; 7:68. **Main publication**
18. Garåsen H Magnussen J Windspoll R *et al*. Elderly patients in hospitals or nursing homes in intermediæravdeling - A cost analysis. *Tidsskr Nor Legeforen* 2008a; 128: 283-5 (Danish)
19. Garåsen H, Windspoll R, Johnsen R. Long term patients' outcomes after intermediate care at a community hospital for elderly patients: 12-month follow-up of a randomized controlled trial. *Scand J Public Health* 2008b; 36(2):197-204.
20. Mendoza H, Martín MJ, García A *et al*. Hospital at home care model as an effective alternative in the management of decompensated chronic heart failure. *Eur J Heart Fail* 2009; 11(12):1208-13. **main publication**
21. García-Soletto A, Parraza-Diez N, Aizpuru-Barandiaran F *et al*. Comparative study of quality of life after hospital-at-home or in-patient admission for acute decompensation of chronic heart failure. *World Journal of Cardiovascular Diseases* 2013; 3; 174-181.

31.05.17

- 1  
2  
3  
4  
5  
6  
7  
8  
9  
10  
11  
12  
13  
14  
15  
16  
17  
18  
19  
20  
21  
22  
23  
24  
25  
26  
27  
28  
29  
30  
31  
32  
33  
34  
35  
36  
37  
38  
39  
40  
41  
42  
43  
44  
45  
46  
47  
48  
49  
50  
51  
52  
53  
54  
55  
56  
57  
58  
59  
60
22. Tibaldi V, Isaia G, Scarafiotti C *et al.* Hospital at home for elderly patients with acute decompensation of chronic heart failure: a prospective randomized controlled trial. *Arch Intern Med* 2009; 169(17):1569-75.
  23. Patel H, Shafazand M, Ekman I *et al.* Home care as an option in worsening chronic heart failure- a pilot study to evaluate feasibility, quality adjusted life years and cost-effectiveness. *Eur J Heart Fail* 2008; 10(7):675-81.
  24. Ricauda Aimonino N, Tibaldi V, Leff B *et al.* Substitutive "hospital at home" versus inpatient care for elderly patients with exacerbations of chronic obstructive pulmonary disease: a prospective randomized, controlled trial. *J Am Geriatr Soc* 2008; 56(3):493-500.
  25. Rodríguez-Cerrillo M, Alvarez-Arcaya A, Fernández-Díaz E *et al.* A prospective study of the management of non-massive pulmonary embolism in the home. *Eur J Intern Med* 2009; 20(6):598-600.
  26. Carratalà J, Fernández-Sabé N, Ortega L *et al.* Outpatient care compared with hospitalization for community-acquired pneumonia: a randomized trial in low-risk patients. *Ann Intern Med* 2005; 142(3):165-72.
  27. Kalra L, Evans A, Perez I *et al.* A randomised controlled comparison of alternative strategies in stroke care. *Health Technol Assess* 2005; 9(18): iii-iv, 1-79.
  28. Rodríguez-Cerrillo M, Poza-Montoro A, Fernandez-Diaz E *et al.* Treatment of elderly patients with uncomplicated diverticulitis, even with comorbidity, at home. *Eur J Intern Med* 2013; 24(5):430-2.
  29. Leff B, Burton L, Mader SL *et al.* Hospital at home: feasibility and outcomes of a program to provide hospital-level care at home for acutely ill older patients. *Ann Intern Med* 2005; 143(11):798-808. **main publication**
  30. Leff B, Burton L, Mader SL *et al.* Comparison of functional outcomes associated with hospital at home care and traditional acute hospital care. *J Am Geriatr Soc* 2009; 57(2):273 -8.
  31. Frick KD, Burton LC, Clark R *et al.* Substitutive Hospital at Home for older persons: effects on costs. *Am J Manag Care* 2009; 15(1):49-56.
  32. Crilly J, Chaboyer W, Wallis M *et al.* An outcomes evaluation of an Australian Hospital in the Nursing Home admission avoidance programme. *J Clin Nurs* 2011; 20(7-8):1178-87.



31.05.17

- 1  
2  
3 33. Lau L, Chong CP, Lim WK. Hospital treatment in residential care facilities is a  
4 viable alternative to hospital admission for selected patients. *Geriatr Gerontol*  
5 *Int* 2013; 13(2):378-83.  
6  
7  
8 34. Qaddoura A, Yazdan-Ashoori P, Kabali C *et al*. Efficacy of Hospital at home  
9 in patients with Heart Failure: A Systematic Review and Meta-Analysis. *PLoS*  
10 *One* 2015; 10(6):e0129282.  
11  
12  
13 35. Shepperd S, Iliffe S, Doll HA, Clarke MJ, Kalra L, Wilson AD, Gonçalves-  
14 Bradley DC. Admission avoidance hospital at home. *Cochrane Database Syst*  
15 *Rev*. 2016 Sep 1; 9:CD007491.  
16  
17  
18 36. Jeppesen E, Brurberg KG, Vist GE *et al*. Hospital at home for acute  
19 exacerbations of chronic obstructive pulmonary disease. *Cochrane Database*  
20 *Syst Rev* 2012; 5:CD003573.  
21  
22  
23 37. Vinson DR, Zehtabchi S, Yealy DM. Can selected patients with newly  
24 diagnosed pulmonary embolism be safely treated without hospitalization? A  
25 systematic review. *Ann Emerg Med* 2012; 60(5):651-662.  
26  
27  
28 38. Chalmers JD, Akram AR, Hill AT. Increasing outpatient treatment  
29 of mild community-acquired pneumonia: systematic review and meta-analysis.  
30 *Eur Respir J* 2011; 37(4):858-64.  
31  
32  
33 39. Caplan GA. A meta-analysis of "hospital in the home". *Med J Aust* 2013;  
34 198(4):195-6.  
35  
36  
37 40. Varney J, Weiland, TJ, Jelinek G. Efficacy of hospital in the home services  
38 providing care for patients admitted from emergency departments: an  
39 integrative review. *Internat J Evidence-Based Healthcare* 2014; 12(2): 128–  
40 141.  
41  
42  
43 41. NICE pathway for stroke accessed at  
44 <https://pathways.nice.org.uk/pathways/stroke> on 20/12/16  
45  
46  
47 42. Higgins JPT, Green S (editors). *Cochrane Handbook for Systematic Reviews of*  
48 *Interventions* Version 5.1.0 [updated March 2011]. The Cochrane Collaboration,  
49 2011.  
50  
51  
52  
53  
54  
55  
56  
57  
58  
59  
60

PRISMA flow diagram



## Appendix 1: Parent search strategy run in Medline

Database: Medline In-process - current week, Medline 1950 to present

Search Strategy: Run April 24<sup>th</sup> 2015

- 1 intervention?.ti. or (intervention? adj6 (clinician? or collaborat\$ or community or complex or DESIGN\$ or doctor? or educational or family doctor? or family physician? or family practitioner? or financial or GP or general practice? or hospital? or impact? or improv\$ or individuali?e? or individuali?ing or interdisciplin\$ or multicomponent or multi-component or multidisciplin\$ or multidisciplin\$ or multifacet\$ or multi-facet\$ or multimodal\$ or multi-modal\$ or personali?e? or personali?ing or pharmacies or pharmacist? or pharmacy or physician? or practitioner? or prescrib\$ or prescription? or primary care or professional\$ or provider? or regulatory or regulatory or tailor\$ or target\$ or team\$ or usual care)).ab. (178760)
- 2 (pre-intervention? or preintervention? or "pre intervention?" or post-intervention? or postintervention? or "post intervention?").ti,ab. (11719)
- 3 (hospital\$ or patient?).hw. and (study or studies or care or health\$ or practitioner? or provider? or physician? or nurse? or nursing or doctor?).ti,hw. (747131)
- 4 demonstration project?.ti,ab. (2027)
- 5 (pre-post or "pre test\$" or pretest\$ or posttest\$ or "post test\$" or (pre adj5 post)).ti,ab. (72037)
- 6 (pre-workshop or post-workshop or (before adj3 workshop) or (after adj3 workshop)).ti,ab. (653)
- 7 trial.ti. or ((study adj3 aim?) or "our study").ab. (697929)
- 8 (before adj10 (after or during)).ti,ab. (375455)
- 9 ("quasi-experiment\$" or quasiexperiment\$ or "quasi random\$" or quasirandom\$ or "quasi control\$" or quasicontrol\$ or ((quasi\$ or experimental) adj3 (method\$ or study or trial or design\$))).ti,ab,hw. (107858)
- 10 ("time series" adj2 interrupt\$).ti,ab,hw. (1212)
- 11 (time points adj3 (over or multiple or three or four or five or six or seven or eight or nine or ten or eleven or twelve or month\$ or hour? or day? or "more than")).ab. (10245)
- 12 pilot.ti. (43282)
- 13 Pilot projects/ (86631)
- 14 (clinical trial or controlled clinical trial or multicenter study).pt. (644558)
- 15 (multicentre or multicenter or multi-centre or multi-center).ti. (31588)

- 1  
2  
3  
4 16 random\$.ti,ab. or controlled.ti. (809402)  
5 17 (control adj3 (area or cohort? or compare? or condition or design or group? or  
6 intervention? or participant? or study)).ab. not (controlled clinical trial or  
7 randomized controlled trial).pt. (440969)  
8  
9 18 Aged/ (2394306)  
10 19 "Aged, 80 and over"/ (647729)  
11 20 older adults.mp. (38411)  
12 21 elderly adults.mp. (2417)  
13 22 over 65 years.mp. (3421)  
14 23 virtual ward.mp. (12)  
15 24 intermediate care.mp. (1478)  
16 25 Crisis response.mp. (103)  
17 26 Crisis resolution.mp. (99)  
18 27 reablement.mp. (12)  
19 28 re-ablement.mp. (11)  
20 29 hospital care at home.mp. (14)  
21 30 hospital-at-home.mp. (289)  
22 31 home hospital.mp. (150)  
23 32 medical day hospital care.mp. (2)  
24 33 day hospital.mp. (2435)  
25 34 out-patient facility.mp. (13)  
26 35 Domiciliary care.mp. (247)  
27 36 intermediate services.mp. (7)  
28 37 Intermediate Care Facilities/ (639)  
29 38 Home Care Services, Hospital-Based/ (1662)  
30 39 Home Health Nursing/ (58)  
31 40 Home Nursing/ (8049)  
32 41 admission avoidance.mp. (56)  
33 42 outreach program.mp. (677)  
34 43 hospital outreach.mp. (27)  
35 44 nursing-led units.mp. (3)  
36 45 hospital in home.mp. (8)  
37 46 hospital in the home.mp. (123)  
38 47 medical home care.mp. (39)  
39  
40  
41  
42  
43  
44  
45  
46  
47

- 1  
2  
3 48 Crisis intervention service.mp. (31)  
4  
5 49 Geriatric emergency management practice model.mp. (1)  
6  
7 50 day unit.mp. (169)  
8  
9 51 Day Care/ (4670)  
10  
11 52 day centre.mp. (170)  
12  
13 53 comprehensive elderly care.mp. (2)  
14  
15 54 Substitutive care.mp. (1)  
16  
17 55 shared care.mp. (916)  
18  
19 56 guided care.mp. (69)  
20  
21 57 home-based versus hospital-based.mp. (11)  
22  
23 58 home hospitalisation.mp. (28)  
24  
25 59 rapid response team.mp. (515)  
26  
27 60 rapid response nurse.mp. (2)  
28  
29 61 Hospitals, Community/ (10479)  
30  
31 62 \*Ambulatory Care/ (15963)  
32  
33 63 \*Health Services for the Aged/ (12112)  
34  
35 64 or/1-17 (3278427)  
36  
37 65 or/23-63 (57831)  
38  
39 66 or/18-22 (2428347)  
40  
41 67 64 and 65 and 66 (11288)  
42  
43 68 67 not (child/ or infant/ or adolescent/ or maternal health services/) (9807)  
44  
45 69 68 not (case report/ or case study/ or letter/ or editorial/ or expert opinion.mp.)  
46 [mp=title, abstract, original title, name of substance word, subject heading  
47 word, keyword heading word, protocol supplementary concept word, rare  
48 disease supplementary concept word, unique identifier] (9192)  
49  
50 70 69 not (Algeria\$ or Egypt\$ or Liby\$ or Morocc\$ or Tunisia\$ or Western  
51 Sahara\$ or Angola\$ or Benin or Botswana\$ or Burkina Faso or Burundi or  
52 Cameroon or Cape Verde or Central African Republic or Chad or Comoros or  
53 Congo or Djibouti or Eritrea or Ethiopia\$ or Gabon or Gambia\$ or Ghana or  
54 Guinea or Keny\$ or Lesotho or Liberia or Madagasca\$ or Malawi or Mali or  
55 Mauritania or Mauritius or Mayotte or Mozambiq\$ or Namibia\$ or Niger or  
56 Nigeria\$ or Reunion or Rwand\$ or Saint Helena or Senegal or Seychelles or  
57 Sierra Leone or Somalia or South Africa\$ or Sudan or Swaziland or Tanzania  
58 or Togo or Ugand\$ or Zambia\$ or Zimbabw\$ or China or Chinese or Hong  
59 Kong or Macao or Mongolia\$ or Taiwan\$ or Belarus or Moldov\$ or Russia\$ or  
60 Ukraine or Afghanistan or Armenia\$ or Azerbaijan or Bahrain or Cyprus or  
Cypriot or Georgia\$ or Iran\$ or Iraq\$ or Israel\$ or Jordan\$ or Kazakhstan or  
Kuwait or Kyrgyzstan or Leban\$ or Oman or Pakistan\$ or Palestin\$ or Qatar or  
Saudi Arabia or Syria\$ or Tajikistan or Turkmenistan or United Arab Emirates

1  
2  
3  
4 or Uzbekistan or Yemen or Bangladesh\$ or Bhutan or British Indian Ocean  
5 Territory or Brunei Darussalam or Cambodia\$ or India\$ or Indonesia\$ or Lao or  
6 People's Democratic Republic or Malaysia\$ or Maldives or Myanmar or Nepal  
7 or Philippin\$ or Singapore or Sri Lanka or Thai\$ or Timor Leste or Vietnam or  
8 Albania\$ or Andorra or Bosnia\$ or Herzegovina\$ or Bulgaria\$ or Croatia\$ or  
9 Estonia or Faroe Islands or Greenland or Liechtenstein or Lithuanian\$ or  
10 Macedonia or Malta or maltese or Romania or Serbia\$ or Montenegro or  
11 Slovenia or Svalbard or Argentina\$ or Belize or Bolivia\$ or Brazil\$ or chile or  
12 Chilean or Colombia\$ or Costa Rica\$ or Cuba or Ecuador or El Salvador or  
13 French Guiana or Guatemala\$ or Guyana or Haiti or Honduras or Jamaica\$ or  
14 Nicaragua\$ or Panama or Paraguay or Peru or Puerto Rico or Suriname or  
15 Uruguay or Venezuela or developing countr\$ or south America\$).ti,sh. (8719)  
16  
17

- 18 71 admission\*.ab. (140603)  
19  
20 72 hospital\*.ab. (747796)  
21  
22 73 71 or 72 (804011)  
23  
24 74 70 and 73 (3851)  
25  
26 75 limit 74 to yr="2005 -Current" (1880)  
27  
28 76 remove duplicates from 75 (1829)  
29  
30  
31  
32  
33  
34  
35  
36  
37  
38  
39  
40  
41  
42  
43  
44  
45  
46  
47  
48  
49  
50  
51  
52  
53  
54  
55  
56  
57  
58  
59  
60

## Appendix 2: EPOC Risk of bias

### *Paramedic (PP) / emergency care practitioner (ECP) interventions*

#### Study: Mason 2007 RCT - older population with mixed conditions

| Bias                                                                        | Authors' judgement | Support for judgement                                                                                                                                                                                                                                                                                                                                                                                                                                                                                                                  |
|-----------------------------------------------------------------------------|--------------------|----------------------------------------------------------------------------------------------------------------------------------------------------------------------------------------------------------------------------------------------------------------------------------------------------------------------------------------------------------------------------------------------------------------------------------------------------------------------------------------------------------------------------------------|
| Was allocation sequence adequately generated?                               | Low risk           | 'We used cluster randomisation to reduce the risk of contamination (practice in the control group being influenced by the presence of the paramedic practitioner in the community) and to allow service level, rather than individual patient level, evaluation of the intervention. Weeks were randomised before the start of the study (to allow for rostering of the paramedic practitioners) to the paramedic practitioner service being active (intervention) or inactive (control), when the standard 999 service was available' |
| Was allocation adequately concealed?                                        | Low risk           | 'Episode of care with some form of centralised randomisation scheme'                                                                                                                                                                                                                                                                                                                                                                                                                                                                   |
| Were baseline outcome measurements similar?                                 | Unclear risk       | No baseline measure of outcomes since they were related to receiving intervention e.g. ED attendance                                                                                                                                                                                                                                                                                                                                                                                                                                   |
| Were baseline characteristics similar?                                      | Low risk           | Baseline characteristics of intervention and control groups were reported and similar                                                                                                                                                                                                                                                                                                                                                                                                                                                  |
| Were incomplete outcome data adequately addressed?                          | Low risk           | Flow of patients through trial was presented and intention-to-treat analysis used                                                                                                                                                                                                                                                                                                                                                                                                                                                      |
| Was knowledge of allocated interventions adequately prevented during study? | Low risk           | Majority of outcomes were objective but there was one about satisfaction with service i.e. subjective                                                                                                                                                                                                                                                                                                                                                                                                                                  |
| Was study adequately protected against contamination?                       | Low risk           | 'We used cluster randomisation to reduce the risk of contamination (practice in the control group being influenced by the presence of the paramedic practitioner in the community) and to allow service level, rather than individual patient level, evaluation of the intervention'.                                                                                                                                                                                                                                                  |
| Was study free from selective outcome reporting?                            | Low risk           | All outcome measures described in methods section were reported in results section                                                                                                                                                                                                                                                                                                                                                                                                                                                     |
| Was study free from other risks of bias?                                    | Low risk           | Nothing obvious                                                                                                                                                                                                                                                                                                                                                                                                                                                                                                                        |

#### Study: Gray 2008 historical controls - older people with falls

| Bias                                                                        | Authors' judgement | Support for judgement                                                                                                                                                                                                                                                                                                                                                                                             |
|-----------------------------------------------------------------------------|--------------------|-------------------------------------------------------------------------------------------------------------------------------------------------------------------------------------------------------------------------------------------------------------------------------------------------------------------------------------------------------------------------------------------------------------------|
| Was allocation sequence adequately generated?                               | High risk          | 'From January to April 2006 inclusive, all the patients seen by the ECP service who had rung 999 with a diagnosis of either breathing difficulties or an elderly patient (.65 years of age) with a fall were reviewed.' 'Comparison data were taken from January to April 2005 inclusive for attendances to the same ED for patients with the same criteria as above seen by non-ECP ambulance service personnel' |
| Was allocation adequately concealed?                                        | High risk          | As above                                                                                                                                                                                                                                                                                                                                                                                                          |
| Were baseline outcome measurements similar?                                 | Unclear risk       | No baseline measure of outcomes since they were related to receiving intervention e.g. ED attendance                                                                                                                                                                                                                                                                                                              |
| Were baseline characteristics similar?                                      | Unclear risk       | No details given other than 'elderly patients >65yrs with a fall'                                                                                                                                                                                                                                                                                                                                                 |
| Were incomplete outcome data adequately addressed?                          | Unclear risk       | No reference to missing data or how it might be handled                                                                                                                                                                                                                                                                                                                                                           |
| Was knowledge of allocated interventions adequately prevented during study? | Low risk           | Outcome measures were all objective                                                                                                                                                                                                                                                                                                                                                                               |
| Was study adequately protected against contamination?                       | Low risk           | Different data collection time-periods were reported for each group                                                                                                                                                                                                                                                                                                                                               |
| Was study free from selective outcome reporting?                            | Low risk           | All outcome measures described in methods section were reported in results section                                                                                                                                                                                                                                                                                                                                |
| Was study free from other risks of bias?                                    | Low risk           | Only used half of the study population                                                                                                                                                                                                                                                                                                                                                                            |

#### Study: Mason 2012 'quasi experimental' - older population with mixed conditions

| Bias                                                                        | Authors' judgement | Support for judgement                                                                                                                                                                                                                                                                                                                                                  |
|-----------------------------------------------------------------------------|--------------------|------------------------------------------------------------------------------------------------------------------------------------------------------------------------------------------------------------------------------------------------------------------------------------------------------------------------------------------------------------------------|
| Was allocation sequence adequately generated?                               | High risk          | 'Potential 'intervention' trust sites were selected on the basis of their heterogeneity of service delivery of ECP care. 'Control' trust sites that did not employ ECPs, but were in close geographical proximity (i.e. within the same or in a neighbouring county) and which offered the same service configurations as the intervention trusts, were then selected' |
| Was allocation adequately concealed?                                        | High risk          | As above                                                                                                                                                                                                                                                                                                                                                               |
| Were baseline outcome measurements similar?                                 | Unclear risk       | No baseline measure of outcomes since they were related to receiving intervention e.g. ED attendance                                                                                                                                                                                                                                                                   |
| Were baseline characteristics similar?                                      | High risk          | For the care home subgroup, figures were given on selected baseline characteristics but no formal comparison appeared to be made. On face value, clinical characteristics were not balanced e.g. adult medical 30 vs.41%, adult trauma 46 vs.13%                                                                                                                       |
| Were incomplete outcome data adequately addressed?                          | Unclear risk       | No reference to missing data or how it might be handled                                                                                                                                                                                                                                                                                                                |
| Was knowledge of allocated interventions adequately prevented during study? | Low risk           | Outcome measures were all objective                                                                                                                                                                                                                                                                                                                                    |
| Was study adequately protected against contamination?                       | Low risk           | Intervention and control were delivered in different locations                                                                                                                                                                                                                                                                                                         |
| Was study free from selective outcome reporting?                            | Low risk           | All outcome measures described in methods section were reported in results section                                                                                                                                                                                                                                                                                     |
| Was study free from other risks of bias?                                    | Low risk           | Nothing obvious                                                                                                                                                                                                                                                                                                                                                        |



## Emergency Department (ED) interventions

### Study: Sun 2014 RCT - syncope

| Bias                                                                        | Authors' judgement | Support for judgement                                                                                                                                                                                                                         |
|-----------------------------------------------------------------------------|--------------------|-----------------------------------------------------------------------------------------------------------------------------------------------------------------------------------------------------------------------------------------------|
| Was allocation sequence adequately generated?                               | Low risk           | 'Patients were block randomized (n=4) by site in a 1:1 ratio to either the observation protocol or routine inpatient admission'                                                                                                               |
| Was allocation adequately concealed?                                        | Low risk           | 'A computer generated the study arm assignment at randomization, and no research personnel had advance knowledge of study arm assignment. We could not blind this health service intervention to patients, providers, or research personnel.' |
| Were baseline outcome measurements similar?                                 | Unclear risk       | No baseline measure of outcomes since they were related to receiving intervention e.g. inpatient admission rates                                                                                                                              |
| Were baseline characteristics similar?                                      | Low risk           | Baseline characteristics of intervention and control groups were reported and similar                                                                                                                                                         |
| Were incomplete outcome data adequately addressed?                          | Low risk           | Flow chart of participants provided and intention-to-treat analysis performed                                                                                                                                                                 |
| Was knowledge of allocated interventions adequately prevented during study? | Low risk           | Outcome measures were objective but one secondary outcome - participant satisfaction - was subjective                                                                                                                                         |
| Was study adequately protected against contamination?                       | Unclear risk       | Treatment and control were allocated and delivered in same location so possible for participants to swap allocation                                                                                                                           |
| Was study free from selective outcome reporting?                            | Low risk           | All outcome measures described in methods section were reported in results section                                                                                                                                                            |
| Was study free from other risks of bias?                                    | Low risk           | Nothing obvious                                                                                                                                                                                                                               |

### Study: Salvi 2008 CT - older population with mixed conditions

| Bias                                                                        | Authors' judgement | Support for judgement                                                                                                                                                                                            |
|-----------------------------------------------------------------------------|--------------------|------------------------------------------------------------------------------------------------------------------------------------------------------------------------------------------------------------------|
| Was allocation sequence adequately generated?                               | High risk          | 'Trained research assistant (VM) screened patients presenting to the ED for Monday to Friday from 9:00 a.m to 6:00 p.m using a standard information sheet explaining the study protocol to patients and proxies' |
| Was allocation adequately concealed?                                        | High risk          | As above                                                                                                                                                                                                         |
| Were baseline outcome measurements similar?                                 | Unclear risk       | No baseline measure of outcomes since they were related to receiving intervention e.g. number of initial admissions                                                                                              |
| Were baseline characteristics similar?                                      | High risk          | Intervention and control groups were unbalanced - age, 78.1(7) vs.82.5(7.2) p<0.001, female 47 vs. 68% p=0.004, married 70 vs. 40% p<0.001, SPMSQ 2.5(3.3) vs. 5.2(4.2) p<0.001, ADL4.3(2) vs. 3.2(2.5) p=0.001  |
| Were incomplete outcome data adequately addressed?                          | Unclear risk       | No reference to missing data or how it might be handled                                                                                                                                                          |
| Was knowledge of allocated interventions adequately prevented during study? | Low risk           | All outcome measures were objective                                                                                                                                                                              |
| Was study adequately protected against contamination?                       | Unclear risk       | Treatment and control were delivered in different locations                                                                                                                                                      |
| Was study free from selective outcome reporting?                            | Low risk           | All outcome measures described in methods section were reported in results section                                                                                                                               |
| Was study free from other risks of bias?                                    | Low risk           | Nothing obvious                                                                                                                                                                                                  |

### Study: Benaiges 2014 CT - hyperglycaemia

| Bias                                                                        | Authors' judgement | Support for judgement                                                                                                                                                                                                          |
|-----------------------------------------------------------------------------|--------------------|--------------------------------------------------------------------------------------------------------------------------------------------------------------------------------------------------------------------------------|
| Was allocation sequence adequately generated?                               | High risk          | 'Patients were assigned to the DH group if they were admitted to hospital within DH opening hours (weekdays from 8:00 a.m to 4:00 p.m); otherwise they were treated in the emergency department and subsequently hospitalized' |
| Was allocation adequately concealed?                                        | High risk          | As above                                                                                                                                                                                                                       |
| Were baseline outcome measurements similar?                                 | Unclear risk       | No baseline measure of outcomes since they were related to receiving intervention e.g. number of ER visits                                                                                                                     |
| Were baseline characteristics similar?                                      | Low risk           | Baseline characteristics of treatment and control groups were reported and similar                                                                                                                                             |
| Were incomplete outcome data adequately addressed?                          | Unclear risk       | No reference to missing data or how it might be handled                                                                                                                                                                        |
| Was knowledge of allocated interventions adequately prevented during study? | Low risk           | All outcome measures were objective                                                                                                                                                                                            |
| Was study adequately protected against contamination?                       | Low risk           | 'Patients were treated with same protocol for both DH and CH' so contamination was possible                                                                                                                                    |
| Was study free from selective outcome reporting?                            | Low risk           | All outcome measures described in methods section were reported in results section                                                                                                                                             |
| Was study free from other risks of bias?                                    | Low risk           | Nothing obvious                                                                                                                                                                                                                |



## Community hospital interventions

### Study: Vicente 2014 RCT

| Bias                                                                        | Authors' judgement | Support for judgement                                                                                                                                                                                                                                                                                                                                                                |
|-----------------------------------------------------------------------------|--------------------|--------------------------------------------------------------------------------------------------------------------------------------------------------------------------------------------------------------------------------------------------------------------------------------------------------------------------------------------------------------------------------------|
| Was allocation sequence adequately generated?                               | Low risk           | 'The dispatchers at the EMCC randomized older adults into the study. A sealed envelope randomization procedure was initiated when the dispatcher received the incoming call and identified the participant as an individual aged 65 who resided in the specified geographical area and was assigned a priority level 2 or 3, and the call occurred between 8:00 a.m. and 10:00 p.m.' |
| Was allocation adequately concealed?                                        | Low risk           | 'The envelope contained the name of the EMS Company 1 or the name of the EMS Company 2. There was an equal chance (1:1) of being assigned to either of the ambulance companies'                                                                                                                                                                                                      |
| Were baseline outcome measurements similar?                                 | Unclear risk       | No baseline measure of outcomes since they were related to receiving intervention e.g. number of individuals sent direct to community hospital                                                                                                                                                                                                                                       |
| Were baseline characteristics similar?                                      | High risk          | There was a difference in the priority level when ambulance sent out (% individuals) – Level 1) 1.6 vs. 0%, Level 2) 59 vs. 47%, Level 3) 39 vs.53%, p=0.001                                                                                                                                                                                                                         |
| Were incomplete outcome data adequately addressed?                          | Unclear risk       | No reference to missing data or how it might be handled                                                                                                                                                                                                                                                                                                                              |
| Was knowledge of allocated interventions adequately prevented during study? | Low risk           | All outcome measures were objective                                                                                                                                                                                                                                                                                                                                                  |
| Was study adequately protected against contamination?                       | Low risk           | Separate sealed envelope opened for each individual case                                                                                                                                                                                                                                                                                                                             |
| Was study free from selective outcome reporting?                            | Low risk           | All outcome measures described in methods section were reported in results section                                                                                                                                                                                                                                                                                                   |
| Was study free from other risks of bias?                                    | Low risk           | Nothing obvious                                                                                                                                                                                                                                                                                                                                                                      |

### Study: Garasen 2007/8 ab RCT - older population with mixed conditions

| Bias                                                                        | Authors' judgement | Support for judgement                                                                                                                                                                                          |
|-----------------------------------------------------------------------------|--------------------|----------------------------------------------------------------------------------------------------------------------------------------------------------------------------------------------------------------|
| Was allocation sequence adequately generated?                               | Low risk           | 'When an eligible patient was identified and accepted for inclusion, a blinded randomisation was performed by the Clinical Research Department using random number tables in blocks to ensure balanced groups' |
| Was allocation adequately concealed?                                        | Low risk           | As above                                                                                                                                                                                                       |
| Were baseline outcome measurements similar?                                 | Unclear risk       | No baseline measure of outcomes since they were related to receiving intervention e.g. number of readmissions for index disease                                                                                |
| Were baseline characteristics similar?                                      | Unclear risk       | Baseline characteristics of intervention and control groups were described but no formal comparison reported                                                                                                   |
| Were incomplete outcome data adequately addressed?                          | Unclear            | No reference to missing data or how it might be handled                                                                                                                                                        |
| Was knowledge of allocated interventions adequately prevented during study? | Low risk           | All outcome measures were objective                                                                                                                                                                            |
| Was study adequately protected against contamination?                       | Low risk           | Participants were allocated using a clear process but 8 individuals originally assigned to CH were later assigned to GH                                                                                        |
| Was study free from selective outcome reporting?                            | Low risk           | All outcomes described in methods section were reported in results section plus 12-month data was used in Garasen 2008                                                                                         |
| Was study free from other risks of bias?                                    | Low risk           | Nothing obvious                                                                                                                                                                                                |

## Hospital-at-Home (HAH) interventions: heart failure

### Study: Patel 2008 pilot RCT - heart failure

| Bias                                                                        | Authors' judgement | Support for judgement                                                                                                                                       |
|-----------------------------------------------------------------------------|--------------------|-------------------------------------------------------------------------------------------------------------------------------------------------------------|
| Was allocation sequence adequately generated?                               | Low risk           | Open pilot RCT                                                                                                                                              |
| Was allocation adequately concealed?                                        | Unclear risk       | Used 'random number generator under direction of specialist nurse or hospital admission staff' but no further detail provided                               |
| Were baseline outcome measurements similar?                                 | Low risk           | Mostly not relevant since majority of outcomes were related to process                                                                                      |
| Were baseline characteristics similar?                                      | Low risk           | Baseline characteristics of intervention and control groups were reported and small differences seen in gender, education and two particular co-morbidities |
| Were incomplete outcome data adequately addressed?                          | High risk          | Flow of patients was described although description of analysis was lacking                                                                                 |
| Was knowledge of allocated interventions adequately prevented during study? | Unclear risk       | No detail provided                                                                                                                                          |
| Was study adequately protected against contamination?                       | Low risk           | Treatment and control were delivered in different locations                                                                                                 |
| Was study free from selective outcome reporting?                            | Unclear risk       | Difficult to understand the description of outcomes in methods section but all were reported in results section                                             |
| Was study free from other risks of bias?                                    | Unclear risk       | Description of analysis and results was possibly too assertive for a feasibility study                                                                      |

**Study: Mendoza 2009/Garcia-Soletto 2013 RCT - heart failure**

| Bias                                                                        | Authors' judgement | Support for judgement                                                                                                                                                                              |
|-----------------------------------------------------------------------------|--------------------|----------------------------------------------------------------------------------------------------------------------------------------------------------------------------------------------------|
| Was allocation sequence adequately generated?                               | Low risk           | 'Randomly assigned (1:1) to one of the intervention groups according to an externally generated sequence, which was hidden from the clinicians until the patient had given consent to participate' |
| Was allocation adequately concealed?                                        | Low risk           | As above                                                                                                                                                                                           |
| Were baseline outcome measurements similar?                                 | Low risk           | Mostly not relevant since outcomes were related to process but functional status and health-related QoL were similar                                                                               |
| Were baseline characteristics similar?                                      | Low risk           | Baseline characteristics of intervention and control groups were reported and similar                                                                                                              |
| Were incomplete outcome data adequately addressed?                          | Low risk           | Patient flow through trial was described and 'per protocol' analysis performed                                                                                                                     |
| Was knowledge of allocated interventions adequately prevented during study? | Unclear risk       | No detail provided                                                                                                                                                                                 |
| Was study adequately protected against contamination?                       | Low risk           | Treatment and control were delivered in different locations                                                                                                                                        |
| Was study free from selective outcome reporting?                            | Low risk           | All outcome measures described in methods section were reported in results section                                                                                                                 |
| Was study free from other risks of bias?                                    | Low risk           | Nothing obvious                                                                                                                                                                                    |

**Study: Tibaldi 2009 RCT - heart failure**

| Bias                                                                        | Authors' judgement | Support for judgement                                                                                                                                                                                                                                                                                                   |
|-----------------------------------------------------------------------------|--------------------|-------------------------------------------------------------------------------------------------------------------------------------------------------------------------------------------------------------------------------------------------------------------------------------------------------------------------|
| Was allocation sequence adequately generated?                               | Low risk           | 'By the use of a set of computer-generated random numbers in a 1:1 ratio. The allocation sequence was unknown to any of the investigators and was contained in a set of sealed envelopes, each bearing on the outside only the name of the hospital and a number, which was opened after the acceptance of the patient' |
| Was allocation adequately concealed?                                        | Low risk           | Participants were enrolled within 12-24 hours of ED admission by research assistants, masked to both allocation and hypotheses being tested                                                                                                                                                                             |
| Were baseline outcome measurements similar?                                 | Low risk           | Mostly not relevant since outcomes were related to process but depression, function and nutrition measures were similar                                                                                                                                                                                                 |
| Were baseline characteristics similar?                                      | Unclear risk       | Baseline characteristics of intervention and control groups were reported and heart rate was significantly different p=0.006                                                                                                                                                                                            |
| Were incomplete outcome data adequately addressed?                          | Low risk           | Patient flow through trial described and intention-to-treat analysis performed                                                                                                                                                                                                                                          |
| Was knowledge of allocated interventions adequately prevented during study? | Unclear risk       | No detail available                                                                                                                                                                                                                                                                                                     |
| Was study adequately protected against contamination?                       | Low risk           | Treatment and control were delivered in different locations                                                                                                                                                                                                                                                             |
| Was study free from selective outcome reporting?                            | Low risk           | All outcome measures described in methods section were reported in results section                                                                                                                                                                                                                                      |
| Was study free from other risks of bias?                                    | Low risk           | Nothing obvious                                                                                                                                                                                                                                                                                                         |

**Hospital-at-Home (HAH): COPD****Study: Ricauda 2008 RCT - COPD**

| Bias                                                                        | Authors' judgement | Support for judgement                                                                                                                                                                                                                                                                                             |
|-----------------------------------------------------------------------------|--------------------|-------------------------------------------------------------------------------------------------------------------------------------------------------------------------------------------------------------------------------------------------------------------------------------------------------------------|
| Was allocation sequence adequately generated?                               | Low risk           | Patients were randomised using a set of computer-generated random numbers in a 1:1 ratio.                                                                                                                                                                                                                         |
| Was allocation adequately concealed?                                        | Low risk           | Allocation sequence was unknown to any of the investigators and kept in a set of sealed envelopes, each bearing on the outside only the name of the hospital and a number. After acceptance of a patient, the ED nurse coordinator, who was not involved in the study, opened the appropriately numbered envelope |
| Were baseline outcome measurements similar?                                 | Low risk           | Mostly not relevant since outcomes were related to process but clinical outcomes e.g. depression were similar                                                                                                                                                                                                     |
| Were baseline characteristics similar?                                      | Low risk           | Recorded in DE table                                                                                                                                                                                                                                                                                              |
| Were incomplete outcome data adequately addressed?                          | Low risk           | Drop outs/loss-to-follow-up were recorded and intention-to-treat analysis performed                                                                                                                                                                                                                               |
| Was knowledge of allocated interventions adequately prevented during study? | Unclear risk       | Single-blind study since patients were aware of the treatment assignment although physicians and nurses evaluating patients were blinded to the patient's allocation                                                                                                                                              |
| Was study adequately protected against contamination?                       | Low risk           | Treatment and control were delivered in different locations                                                                                                                                                                                                                                                       |
| Was study free from selective outcome reporting?                            | Low risk           | All outcome measures described in methods section were reported in results section                                                                                                                                                                                                                                |
| Was study free from other risks of bias?                                    | Low risk           | Nothing obvious                                                                                                                                                                                                                                                                                                   |

## Hospital-at-Home (HAH): Pulmonary embolism

### Study: Rodriguez-Cerillo 2009 nRCT - non-massive pulmonary embolism

| Bias                                                                        | Authors' judgement | Support for judgement                                                                                                                                                         |
|-----------------------------------------------------------------------------|--------------------|-------------------------------------------------------------------------------------------------------------------------------------------------------------------------------|
| Was allocation sequence adequately generated?                               | High risk          | nRCT                                                                                                                                                                          |
| Was allocation adequately concealed?                                        | High risk          | nRCT                                                                                                                                                                          |
| Were baseline outcome measurements similar?                                 | Low risk           | Mostly not relevant since outcomes were related to process                                                                                                                    |
| Were baseline characteristics similar?                                      | Low risk           | Baseline characteristics of treatment and control groups were reported and only difference was prior thromboembolic disease, with these cases all being allocated to hospital |
| Were incomplete outcome data adequately addressed?                          | High risk          | No patient flow or analysis was described                                                                                                                                     |
| Was knowledge of allocated interventions adequately prevented during study? | High risk          | nRCT                                                                                                                                                                          |
| Was study adequately protected against contamination?                       | Low risk           | Clinical decision-making at study entry and any subsequent changes were recorded – although none made in practice                                                             |
| Was study free from selective outcome reporting?                            | Low risk           | All outcome measures described in methods section were reported in results section                                                                                            |
| Was study free from other risks of bias?                                    | High risk          | Reported some 'external' decision-making                                                                                                                                      |

## Hospital-at-Home (HAH): Pneumonia

### Study: Carratala 2005 open RCT - pneumonia

| Bias                                                                        | Authors' judgement | Support for judgement                                                                                                                                                                                                                                                                                                                                                                                       |
|-----------------------------------------------------------------------------|--------------------|-------------------------------------------------------------------------------------------------------------------------------------------------------------------------------------------------------------------------------------------------------------------------------------------------------------------------------------------------------------------------------------------------------------|
| Was allocation sequence adequately generated?                               | Low risk           | Randomisation was performed by using a computer-generated random code with a block size of 10                                                                                                                                                                                                                                                                                                               |
| Was allocation adequately concealed?                                        | Low risk           | Randomisation was stratified by hospital site, and the random code was held centrally, in a sealed envelope, by the clinical epidemiologist. In the emergency department, the infectious disease consultant (in most cases not a study investigator) opened sealed, sequentially numbered opaque envelopes to randomly assign patients who had provided written informed consent and met the study criteria |
| Were baseline outcome measurements similar?                                 | Low risk           | Mostly not relevant since outcomes were related to process                                                                                                                                                                                                                                                                                                                                                  |
| Were baseline characteristics similar?                                      | Low risk           | Detailed in DE table                                                                                                                                                                                                                                                                                                                                                                                        |
| Were incomplete outcome data adequately addressed?                          | Low risk           | Patient flow through trial was reported and intention-to-treat analysis performed                                                                                                                                                                                                                                                                                                                           |
| Was knowledge of allocated interventions adequately prevented during study? | Unclear risk       | Trial was described as 'unblinded'                                                                                                                                                                                                                                                                                                                                                                          |
| Was study adequately protected against contamination?                       | Low risk           | Treatment and control were delivered in different locations                                                                                                                                                                                                                                                                                                                                                 |
| Was study free from selective outcome reporting?                            | Low risk           | All outcome measures described in methods section were reported in results section                                                                                                                                                                                                                                                                                                                          |
| Was study free from other risks of bias?                                    | Unclear risk       | Lack of blinding in terms of assessment could be problematic                                                                                                                                                                                                                                                                                                                                                |

## Hospital-at-Home (HAH): Stroke

### Study: Kalra 2005 RCT - stroke

| Bias                                                                        | Authors' judgement | Support for judgement                                                                                                                                                                                                                       |
|-----------------------------------------------------------------------------|--------------------|---------------------------------------------------------------------------------------------------------------------------------------------------------------------------------------------------------------------------------------------|
| Was allocation sequence adequately generated?                               | Low risk           | Randomisation was not stratified and was undertaken using the block randomisation technique. This ensured that the number of patients allocated to the stroke unit or to domiciliary services at any one time did not exceed their capacity |
| Was allocation adequately concealed?                                        | Unclear risk       | Randomisation was conducted in blocks of 30 in an office remote from patient treatment areas, so that it would not be possible for those enrolling patients to guess allocation for the vast majority of subjects                           |
| Were baseline outcome measurements similar?                                 | Low risk           | Mostly not relevant since outcomes were related to process                                                                                                                                                                                  |
| Were baseline characteristics similar?                                      | Low risk           | Baseline characteristics with regard to stroke type, severity, level of impairment and initial disability were well-matched across the three groups                                                                                         |
| Were incomplete outcome data adequately addressed?                          | Low risk           | Patient flow through trial was reported and intention-to-treat analysis performed                                                                                                                                                           |
| Was knowledge of allocated interventions adequately prevented during study? | Unclear risk       | No detail provided                                                                                                                                                                                                                          |
| Was study adequately protected against contamination?                       | Unclear risk       | Patients were brought to hospital from domiciliary care if that was considered to be clinically appropriate                                                                                                                                 |
| Was study free from selective outcome reporting?                            | Low risk           | All outcome measures described in methods section were reported in results section                                                                                                                                                          |
| Was study free from other risks of bias?                                    | High risk          | In order to ensure that participants were treated in the most appropriate setting, swapping of groups was possible                                                                                                                          |

## Hospital-at-Home (HAH): Uncomplicated diverticulitis

### Study: Rodriguez-Cerrillo 2013 nRCT - uncomplicated diverticulitis

| Bias                                                                        | Authors' judgement | Support for judgement                                                              |
|-----------------------------------------------------------------------------|--------------------|------------------------------------------------------------------------------------|
| Was allocation sequence adequately generated?                               | High risk          | nRCT                                                                               |
| Was allocation adequately concealed?                                        | High risk          | As above                                                                           |
| Were baseline outcome measurements similar?                                 | Low risk           | Mostly not relevant since outcomes were related to process                         |
| Were baseline characteristics similar?                                      | Low risk           | Very limited details provided about age, gender and presenting complaint           |
| Were incomplete outcome data adequately addressed?                          | High risk          | No flow of patients was given and only basic analysis reported                     |
| Was knowledge of allocated interventions adequately prevented during study? | High risk          | No detail provided                                                                 |
| Was study adequately protected against contamination?                       | Low risk           | Treatment and control were delivered in different locations                        |
| Was study free from selective outcome reporting?                            | Low risk           | All outcome measures described in methods section were reported in results section |
| Was study free from other risks of bias?                                    | Unclear risk       | Both analysis and reporting of results were limited                                |

## Hospital-at-Home (HAH): Mixed population

### Study: Leff 2005/2009 'quasi experimental' - older population with mixed conditions

| Bias                                                                        | Authors' judgement | Support for judgement                                                                                                                                                                                                                                                                                                                                                                                                   |
|-----------------------------------------------------------------------------|--------------------|-------------------------------------------------------------------------------------------------------------------------------------------------------------------------------------------------------------------------------------------------------------------------------------------------------------------------------------------------------------------------------------------------------------------------|
| Was allocation sequence adequately generated?                               | High risk          | 'During the acute care hospital observation phase (1 November 1990 to 30 September 2001), eligible patients were identified and followed through usual hospital care.' During the intervention phase (1 November 2001 to 30 September 2002), eligible patients were identified at the time of admission and were offered the option of receiving their care in hospital-at-home rather than in the acute care hospital' |
| Was allocation adequately concealed?                                        | High risk          | As above                                                                                                                                                                                                                                                                                                                                                                                                                |
| Were baseline outcome measurements similar?                                 | Unclear risk       | No baseline measure of outcomes since they were related to receiving intervention e.g. time before evaluation                                                                                                                                                                                                                                                                                                           |
| Were baseline characteristics similar?                                      | High risk          | Populations differed in measures of poverty, living alone and medication. This was acknowledged but not adjusted for.                                                                                                                                                                                                                                                                                                   |
| Were incomplete outcome data adequately addressed?                          | Low risk           | Intention-to-treat analysis was conducted although there were substantial missing data e.g. in relation to functional status                                                                                                                                                                                                                                                                                            |
| Was knowledge of allocated interventions adequately prevented during study? | Low risk           | All outcomes were objective in Leff 2005 (main publication) but Leff 2009 used self-reported i.e. subjective daily activity of living as an outcome                                                                                                                                                                                                                                                                     |
| Was study adequately protected against contamination?                       | Low risk           | Unlikely that control group received intervention and vice versa. Rather, patients were allocated HaH or admitted and, if HaH was unacceptable they were admitted                                                                                                                                                                                                                                                       |
| Was study free from selective outcome reporting?                            | Low risk           | All outcomes described in methods section were reported in results section. Whilst there is no mention of activities of daily living in Leff 2005, this outcome was reported in Leff 2009                                                                                                                                                                                                                               |
| Was study free from other risks of bias?                                    | Unclear risk       | Possible selection bias related to differences in baseline characteristics e.g. functional status                                                                                                                                                                                                                                                                                                                       |

### Study: Lau 2003 historical controls

| Bias                                                                        | Authors' judgement | Support for judgement                                                                                                                                                                                                                                                                                                                                                  |
|-----------------------------------------------------------------------------|--------------------|------------------------------------------------------------------------------------------------------------------------------------------------------------------------------------------------------------------------------------------------------------------------------------------------------------------------------------------------------------------------|
| Was allocation sequence adequately generated?                               | High risk          | Control trial with historical control group                                                                                                                                                                                                                                                                                                                            |
| Was allocation adequately concealed?                                        | High risk          | As above                                                                                                                                                                                                                                                                                                                                                               |
| Were baseline outcome measurements similar?                                 | Unclear risk       | No baseline measure of outcomes since they were related to receiving intervention e.g. palliative care received                                                                                                                                                                                                                                                        |
| Were baseline characteristics similar?                                      | High risk?         | There was an imbalance in patient characteristics which may have been due to recruitment bias since the provider was responsible for recruiting patients into the trial. There were more dementia patients treated outside of hospital – although presumably their symptoms were 'fairly mild' since more pronounced behavioural problems were excluded from HaH group |
| Were incomplete outcome data adequately addressed?                          | Unclear risk       | No reference to missing data or how it might be handled                                                                                                                                                                                                                                                                                                                |
| Was knowledge of allocated interventions adequately prevented during study? | Low risk           | All outcomes were objective                                                                                                                                                                                                                                                                                                                                            |
| Was study adequately protected against contamination?                       | Low risk           | Unlikely that control group received intervention and vice versa. Rather, patients were allocated HaH or admitted and, if HaH was unacceptable they were admitted                                                                                                                                                                                                      |
| Was study free from selective outcome reporting?                            | Low risk           | All outcome measures described in methods section were reported in results section                                                                                                                                                                                                                                                                                     |
| Was study free from other risks of bias?                                    | Low risk           | Nothing obvious                                                                                                                                                                                                                                                                                                                                                        |

1  
2  
3  
4  
5  
6  
7  
8  
9  
10  
11  
12  
13  
14  
15  
16  
17  
18  
19  
20  
21  
22  
23  
24  
25  
26  
27  
28  
29  
30  
31  
32  
33  
34  
35  
36  
37  
38  
39  
40  
41  
42  
43  
44  
45  
46  
47

**Study name: Crilly 2010 'quasi experimental' - older population with mixed conditions**

| <b>Bias</b>                                                                 | <b>Authors' judgement</b> | <b>Support for judgement</b>                                                                                                                                                                                                                                                                                                         |
|-----------------------------------------------------------------------------|---------------------------|--------------------------------------------------------------------------------------------------------------------------------------------------------------------------------------------------------------------------------------------------------------------------------------------------------------------------------------|
| Was allocation sequence adequately generated?                               | High risk                 | Intervention group included 62 Aged Care Facility (ACF) residents who were enrolled in the Hospital in Nursing home programme during the first 12 months that the programme was operational, from 1 July 2003–30 June 2004. All sample members were ACF residents who presented to the ED and were subsequently admitted to hospital |
| Was allocation adequately concealed?                                        | High risk                 | As above                                                                                                                                                                                                                                                                                                                             |
| Were baseline outcome measurements similar?                                 | Unclear risk              | No baseline measure of outcomes since they were related to receiving intervention e.g. palliative care received                                                                                                                                                                                                                      |
| Were baseline characteristics similar?                                      | Low risk                  | Baseline characteristics of the study and control are reported and similar                                                                                                                                                                                                                                                           |
| Were incomplete outcome data adequately addressed?                          | Unclear                   | No reference to missing data or how it might be handled                                                                                                                                                                                                                                                                              |
| Was knowledge of allocated interventions adequately prevented during study? | Low risk                  | All outcomes were objective                                                                                                                                                                                                                                                                                                          |
| Was study adequately protected against contamination?                       | Low risk                  | Unlikely that control group received intervention and vice versa. Rather, patients were allocated HaH or admitted and, if HaH was unacceptable they were admitted                                                                                                                                                                    |
| Was study free from selective outcome reporting?                            | Low risk                  | All outcome measures described in methods section were reported in results section                                                                                                                                                                                                                                                   |
| Was study free from other risks of bias?                                    | Low risk                  | Nothing obvious                                                                                                                                                                                                                                                                                                                      |

For peer review only

## Appendix 3: AMSTAR ratings of systematic reviews

| Study                     | Was an 'a priori' design provided? | Was there duplicate study selection and data extraction? | Was a comprehensive literature search performed? | Was the status of publication (i.e. grey literature) used as an inclusion criterion? | Was a list of studies (included and excluded) provided? | Were the characteristics of the included studies provided?                      | Was the scientific quality of the included studies assessed and documented? | Was the scientific quality of the included studies used appropriately in formulating conclusions? | Were the methods used to combine the findings of studies appropriate?                                       | Was the likelihood of publication bias assessed? | Was the conflict of interest included? |
|---------------------------|------------------------------------|----------------------------------------------------------|--------------------------------------------------|--------------------------------------------------------------------------------------|---------------------------------------------------------|---------------------------------------------------------------------------------|-----------------------------------------------------------------------------|---------------------------------------------------------------------------------------------------|-------------------------------------------------------------------------------------------------------------|--------------------------------------------------|----------------------------------------|
| Caplan 2012               | YES                                | YES                                                      | YES                                              | YES                                                                                  | NO<br>excluded studies not listed                       | NO<br>studies were grouped by medical, surgical, rehabilitation and psychiatric | YES                                                                         | YES                                                                                               | YES                                                                                                         | YES                                              | YES                                    |
| Chalmers 2011             | YES                                | YES                                                      | YES                                              | NO                                                                                   | NO<br>excluded studies not listed                       | YES<br>but no ages and no direct reporting of participants in either group      | YES<br>but not detailed and whilst Cochrane was cited only one RCT involved | YES                                                                                               | UNCLEAR<br>difficult to judge whether combination of study types is commonly accepted                       | No                                               | YES                                    |
| Jeppensen 2012 (Cochrane) | YES                                | YES                                                      | YES                                              | YES                                                                                  | YES                                                     | YES                                                                             | YES                                                                         | YES                                                                                               | YES                                                                                                         | YES                                              | YES                                    |
| Qaddoura 2015             | YES                                | YES                                                      | YES                                              | YES                                                                                  | NO<br>excluded studies not listed                       | YES                                                                             | YES                                                                         | NO<br>relatively high risk of bias but all available data used                                    | NO<br>meta-analysis of two RCTs plus combination of different QoL measures from same study in meta-analysis | NO                                               | YES                                    |
| Shepperd 2016 (Cochrane)  | YES                                | YES                                                      | YES                                              | YES                                                                                  | YES                                                     | YES                                                                             | YES                                                                         | YES                                                                                               | YES                                                                                                         | YES                                              | YES                                    |
| Varney 2014               | YES                                | NO<br>used single reviewer                               | YES                                              | YES                                                                                  | NO                                                      | YES                                                                             | YES                                                                         | NO                                                                                                | N/A<br>no data were combined                                                                                | NO                                               | YES                                    |
| Vinson 2012               | YES                                | YES                                                      | YES                                              | YES                                                                                  | YES                                                     | YES                                                                             | YES                                                                         | YES                                                                                               | YES                                                                                                         | NO                                               | NO                                     |

1  
2  
3  
4  
5  
6  
7  
8  
9  
10  
11  
12  
13  
14  
15  
16  
17  
18  
19  
20  
21  
22  
23  
24  
25  
26  
27  
28  
29  
30  
31  
32  
33  
34  
35  
36  
37  
38  
39  
40  
41  
42  
43  
44  
45  
46  
47  
48  
49  
50  
51  
52  
53  
54  
55  
56  
57  
58  
59  
60

#### Appendix 4: description of interventions included in systematic review

| Intervention                                                                  | Description                                                                                                                                                                                                                                                                                                                                                                                                                                                                                                                                     |
|-------------------------------------------------------------------------------|-------------------------------------------------------------------------------------------------------------------------------------------------------------------------------------------------------------------------------------------------------------------------------------------------------------------------------------------------------------------------------------------------------------------------------------------------------------------------------------------------------------------------------------------------|
| Paramedic practitioner (PP) / emergency care practitioner (ECP) interventions | PPs/ECPs can be trained to 'assess and treat' or to refer patients with a range of conditions, as part of pre-hospital care. These roles were created in order to provide a more appropriate response to patients needs in emergency and urgent care settings. Their main purpose is to improve the pathway of care and patient experience, particularly by discharging patients at the scene or by referring on to the most appropriate care practitioner, reducing unnecessary emergency department (ED) attendance and avoidable admissions. |
| Community hospital (CH) interventions                                         | The role of CHs varies between country and health systems but, essentially, their main role is to provide non-urgent i.e. routine or rehabilitative care. However, their role can be extended to provide an alternative to acute hospital (AH) admission for appropriate cases.                                                                                                                                                                                                                                                                 |
| Emergency department (ED) interventions                                       | These involve initial assessment in the ED, followed by an extended stay for tests and observation. This extended stay is in a bed closely associated with the ED, if not part of it.                                                                                                                                                                                                                                                                                                                                                           |
| Hospital-at-home (HaH) interventions                                          | HaH services provide acute or sub-acute treatment in a patient's residence for a condition that would normally require admission to hospital. It is also known as 'hospital in the home' and 'home hospitalisation'.                                                                                                                                                                                                                                                                                                                            |
| Hospital in nursing/care home (HNCH) interventions                            | HNCH is as a model of admission avoidance to treat patients living in nursing and residential care homes, working on the same principles as HaH for community-dwelling residents.                                                                                                                                                                                                                                                                                                                                                               |



1  
2  
3  
4  
5  
6  
7  
8  
9  
10  
11  
12  
13  
14  
15  
16  
17  
18  
19  
20  
21  
22  
23  
24  
25  
26  
27  
28  
29  
30  
31  
32  
33  
34  
35  
36  
37  
38  
39  
40  
41  
42  
43  
44  
45  
46  
47

## Appendix 6: Characteristics of those older patients for whom the decision to admit to hospital may be unclear

| Patient characteristics                                                                                                                | Studies which include such populations                                                                                                                                                                                     |
|----------------------------------------------------------------------------------------------------------------------------------------|----------------------------------------------------------------------------------------------------------------------------------------------------------------------------------------------------------------------------|
| <b>Age ≥75 years</b><br>for included patients                                                                                          | 15/19 studies<br><br>Mason 2007 & 2012; Benaiges 2014; Salvi 2008; Garasen 2007; Vincente 2014; Patel 2008; Mendoza 2009; Tibaldi 2009; Ricauda 2008; Kalra 2005; Rodriguez-Cerillo 2013; Leff 2005; Crilly 2010; Lau 2013 |
| <b>Co/multi-morbidities</b><br>in included patients stated either by number of conditions or multi-morbidity score e.g. Charlson Score | 9/19 studies<br><br>Benaiges 2014; Salvi 2008; Patel 2008; Mendoza 2009; Tibaldi 2009; Ricauda 2008; Carratala 2005; Leff 2005; Lau 2013                                                                                   |
| <b>Dementia</b><br>either stated in a) patient demographics or b) used as an exclusion criterion based on severity                     | a) 2/19 studies<br><br>Rodriguez-Cerillo 2009; Lau 2013<br><br>b) 8/19 studies<br><br>Mason 2007; Sun 2014; Salvi 2008; Garasen 2007; Mendoza 2009; Tibaldi 2009; Ricauda 2008; Lau 2013                                   |
| <b>Social care support</b><br>stated in inclusion/exclusion criteria                                                                   | 3/19 studies<br><br>Tibaldi 2009; Ricauda 2008; Kalra 2005;                                                                                                                                                                |
| <b>Home situation</b><br>stated in inclusion/exclusion criteria                                                                        | 7/19 studies<br><br>Benaiges 2014; Garasen 2007; Mendoza 2009; Ricauda 2008; Rodriguez-Cerillo 2009, 2013; Lau 2013                                                                                                        |
| <b>Individual coping abilities</b><br>stated in inclusion/exclusion criteria                                                           | 2/19 studies<br><br>Patel 2008; Rodriguez-Cerillo 2013                                                                                                                                                                     |



## Appendix 5: Detail of included studies

## Paramedic/ECP interventions (n=3)

| Author<br>Year<br>Country | Study                                                                                                                                                                                         | Participants                                                                                                                                                                                                                                                                                                                                                                                                                                                                                                                                                                                                                                                                                                                                                                                                                                                 | Intervention                                                                                                                                                                                                                                                                                                                                                                                                                                                                                                                                                                                                                                                                                                                                                                                                                                                                                                                                                                                                                                                                                                                                                                                                                                                             | Control                                                                                                                                                                                                           | Outcomes assessed                                                                                                                                                                                                                                                                                                                                                                     | Results                                                                                                                                                                                                                                                                                                                                                                                                                                                                                                                                                                                                                                                          |
|---------------------------|-----------------------------------------------------------------------------------------------------------------------------------------------------------------------------------------------|--------------------------------------------------------------------------------------------------------------------------------------------------------------------------------------------------------------------------------------------------------------------------------------------------------------------------------------------------------------------------------------------------------------------------------------------------------------------------------------------------------------------------------------------------------------------------------------------------------------------------------------------------------------------------------------------------------------------------------------------------------------------------------------------------------------------------------------------------------------|--------------------------------------------------------------------------------------------------------------------------------------------------------------------------------------------------------------------------------------------------------------------------------------------------------------------------------------------------------------------------------------------------------------------------------------------------------------------------------------------------------------------------------------------------------------------------------------------------------------------------------------------------------------------------------------------------------------------------------------------------------------------------------------------------------------------------------------------------------------------------------------------------------------------------------------------------------------------------------------------------------------------------------------------------------------------------------------------------------------------------------------------------------------------------------------------------------------------------------------------------------------------------|-------------------------------------------------------------------------------------------------------------------------------------------------------------------------------------------------------------------|---------------------------------------------------------------------------------------------------------------------------------------------------------------------------------------------------------------------------------------------------------------------------------------------------------------------------------------------------------------------------------------|------------------------------------------------------------------------------------------------------------------------------------------------------------------------------------------------------------------------------------------------------------------------------------------------------------------------------------------------------------------------------------------------------------------------------------------------------------------------------------------------------------------------------------------------------------------------------------------------------------------------------------------------------------------|
| Mason<br>2007<br>UK       | Cluster RCT by service<br><br>56 clusters<br><br><b>Intervention:</b><br>paramedic practitioner service<br>n=1469<br><br><b>Control:</b><br>Inactive paramedic practitioner service<br>n=1549 | <b>Inclusion criteria:</b><br>Patients aged ≥60yrs recruited from 1 Sep 2003- 26 Sep 2004. Call originated from a Sheffield postcode between 8am-8pm, with a presenting complaint that fell within the scope of practice of the paramedic practitioners.<br><br><b>Exclusion criteria:</b><br><b>None given</b><br><br>'If patients were unable to complete questionnaires e.g. because of cognitive impairment or who were unable to read English—we obtained consent for follow-up by review of clinical records only.<br><br><b>Baseline characteristics of participants</b><br>Intervention vs. control<br><b>Mean age (SD)</b><br>82.6(8.3) vs. 82.5(8.3) yrs<br><b>Women %</b><br>72 vs.73%<br><b>Living in on own home %</b><br>78vs.78 %<br><b>Presenting complaint %</b><br>Fall 88 vs.89%<br>Haemorrhage 6 vs.5%<br>Acute medical condition 6vs.5% | A paramedic practitioner based in the ambulance control room identified eligible calls by the presenting complaint and notified a paramedic practitioner. All identified patients were approached face to face either in the community or in ED for written consent to follow-up. Patients who had more than one eligible episode were recruited only once. The research team independently checked the ambulance service call database at the end of each month for any additional eligible calls not identified. These were checked for selection bias but not followed up. Scope of practice of paramedic practitioners: Falls, Lacerations, Epistaxis, Minor burns, Foreign body in ear, nose, or throat, Local anaesthetic techniques, Wound care and suturing techniques, Principles of dressings and splintage, Joint examination, Examination of neurological, cardiovascular, and respiratory system, Examination of ear, nose, and throat, Protocol led dispensing: simple analgesia, antibiotics, tetanus toxoid, Assessment of mobility and social needs, Additional options for referral and requesting investigations, Requests for radiography, Referral processes: emergency department, general practitioner, district nurse, community social services | A paramedic practitioner based in the ambulance control room identified eligible calls by the presenting complaint and notified a paramedic practitioner in the ED<br><br>Procedure continued as for intervention | <b>Relevant measures &amp; outcomes</b><br><br>Primary outcomes<br><br><b>ED attendance</b><br><b>Hospital admissions within 28 days</b><br><b>Time of call to time of discharge</b><br><b>Patient satisfaction survey including the EQ-5D</b><br><br>Secondary outcomes<br><br><b>Subsequent unplanned contact with secondary care at 28 days</b><br><br><b>Mortality at 28 days</b> | Intervention vs. control<br><br>Primary outcomes<br><b>ED attendance (28 days)</b><br>970 (62.6%) vs. 1286 (87.5%)<br>p<0.001<br><br><b>Hospital admissions (28 days)</b><br>626 (40.4%) vs. 683 (46.5%)<br>p<0.001<br><br><b>Mean Time of call (SD) to time of discharge in mins</b><br>235.1(183.3) vs. 277.8(182.6)<br>p<0.001<br><br><b>Patient satisfaction survey including the EQ-5D</b><br>Very satisfied with care 656 (85.5%)vs.528 (73.8%)<br>p<0.001<br><br>Secondary outcomes<br><br><b>Subsequent unplanned contact with secondary care</b><br>330(21.3%) vs. 259 (17.6%)<br>p<0.01<br><br><b>Mortality at 28days</b><br>68(4.4%) vs.74(5%) p=0.41 |

| Author<br>Year<br>Country                                                                             | Study                      | Participants                                                                                                                                                                                       | Intervention                                                                                                                                                                                                                                                                                                                                                                     | Control                                                                                                                                                                                                                                                                                                                                                     | Outcomes assessed                                                                                                                                                                                                                                                                                                                                                                                                                                                                                                       | Results                                                                                                                                                                                                                                                                                 |                                                                                                                                                                                                                                                                                                                                                                                                                                                                                           |
|-------------------------------------------------------------------------------------------------------|----------------------------|----------------------------------------------------------------------------------------------------------------------------------------------------------------------------------------------------|----------------------------------------------------------------------------------------------------------------------------------------------------------------------------------------------------------------------------------------------------------------------------------------------------------------------------------------------------------------------------------|-------------------------------------------------------------------------------------------------------------------------------------------------------------------------------------------------------------------------------------------------------------------------------------------------------------------------------------------------------------|-------------------------------------------------------------------------------------------------------------------------------------------------------------------------------------------------------------------------------------------------------------------------------------------------------------------------------------------------------------------------------------------------------------------------------------------------------------------------------------------------------------------------|-----------------------------------------------------------------------------------------------------------------------------------------------------------------------------------------------------------------------------------------------------------------------------------------|-------------------------------------------------------------------------------------------------------------------------------------------------------------------------------------------------------------------------------------------------------------------------------------------------------------------------------------------------------------------------------------------------------------------------------------------------------------------------------------------|
| 1<br>2<br>3<br>4<br>5<br>6<br>7<br>8<br>9<br>10<br>11<br>12<br>13<br>14<br>15<br>16<br>17<br>18<br>19 | Gray<br><br>2008<br><br>UK | <p>COS with historical controls</p> <p><b>Intervention:</b><br/>Emergency care practitioner (ECP) intervention<br/>n=233</p> <p><b>Control:</b><br/>Historical control group from ED<br/>n=772</p> | <p>The study included two groups of patients a) those with breathing difficulties &amp; b) elderly patients &gt;65yrs with a fall. The latter only is reported here.</p> <p><b>Inclusion criteria:</b><br/>Elderly patients &gt;65yrs with a fall.</p> <p><b>Exclusion criteria:</b><br/>None given</p> <p><b>Baseline characteristics of participants</b></p> <p>None given</p> | <p><b>Outline of intervention</b></p> <p>Jan-April 2006 inclusive, all the patients seen by the ECP service who had rung 999 and were an elderly patient (&gt;65yrs) with a fall were reviewed. Each patient seen by an ECP was searched for in the hospital records for ED attendance or admissions in 72 h and 28 days following attendance by an ECP</p> | <p><b>Outline of control</b></p> <p>Comparison data taken Jan- April 2005 inclusive for attendances to same ED for patients with the same criteria as above &amp; seen by non-ECP ambulance service personnel. These dates were chosen because, during this time, the ECP service was not tasked to patients with breathing difficulties and Yorkshire Ambulance Service had only 12 operational ECPs during this comparison period compared with 24 whole-time equivalent operational ECPs during the study period</p> | <p><b>Relevant measures &amp; outcomes</b></p> <p>Outcome on initial contact:</p> <p><b>Treated at and stayed home</b></p> <p><b>ED and or admitted</b></p> <p>At 72hrs &amp; 28 days<br/><b>At home</b><br/><b>ED attendance</b><br/><b>Admission</b></p> <p><b>Costs</b><br/>None</p> | <p><b>ECP vs. ED</b></p> <p>Outcome on initial contact:<br/><b>Stayed at home (PC referral)/went home</b><br/>171 vs. 369<br/>(73% vs. 48% avoidable admission rate)</p> <p><b>At 72hr:</b><br/>21/171 (intervention grp) attended ED and or were admitted</p> <p><b>At 28 days:</b><br/>A further 19 (intervention grp) attended ED and or were admitted</p> <p>Avoidable admission rate (intervention grp) at 28 days was 56% ( 17% better) compared to control group<br/>p&lt;0.05</p> |

| Author<br>Year<br>Country                                                                                               | Study               | Participants                                                                                                                                                                                                                                                                                                                                                                                                                                                                                                                                                                                                                                                                                                                                                                                           | Intervention                                           | Control                                           | Outcomes assessed                                                                                                                                                                                                                                                                                                                                                                                                                                                                 | Results                                                                                                                                                                                                                                                                                                                                                                                                                                                                                                              |
|-------------------------------------------------------------------------------------------------------------------------|---------------------|--------------------------------------------------------------------------------------------------------------------------------------------------------------------------------------------------------------------------------------------------------------------------------------------------------------------------------------------------------------------------------------------------------------------------------------------------------------------------------------------------------------------------------------------------------------------------------------------------------------------------------------------------------------------------------------------------------------------------------------------------------------------------------------------------------|--------------------------------------------------------|---------------------------------------------------|-----------------------------------------------------------------------------------------------------------------------------------------------------------------------------------------------------------------------------------------------------------------------------------------------------------------------------------------------------------------------------------------------------------------------------------------------------------------------------------|----------------------------------------------------------------------------------------------------------------------------------------------------------------------------------------------------------------------------------------------------------------------------------------------------------------------------------------------------------------------------------------------------------------------------------------------------------------------------------------------------------------------|
| 1<br>2<br>3<br>4<br>5<br>6<br>7<br>8<br>9<br>10<br>11<br>12<br>13<br>14<br>15<br>16<br>17<br>18<br>19<br>20<br>21<br>22 | Mason<br>2012<br>UK | <p><b>COS</b></p> <p><b>Inclusion criteria:</b><br/>Informed consent was obtained from all study participants prior to recruitment. Within each pair of services all patients presenting with emergency or urgent complaints that were eligible to be seen by ECPs and presented to either the intervention or the control services between May 2006 and August 2007 were included in the trial.</p> <p><b>Exclusion criteria:</b><br/>No detail</p> <p><b>Baseline characteristics of participants</b><br/>(no stats given)<br/>Care home cohort<br/>Intervention vs. control</p> <p><b>Mean age</b><br/>83.5(10.40 vs. 84.5(8.5) yrs</p> <p><b>% Female</b><br/>68 vs.66%</p> <p><b>Clinical complaint %</b><br/>Adult medical 30 vs.41 %<br/>Adult trauma 46 vs.13 %<br/>Elderly falls 23vs.46%</p> | <p><b>Outline of intervention</b></p> <p>No detail</p> | <p><b>Outline of control</b></p> <p>No detail</p> | <p><b>Relevant measures &amp; outcomes</b></p> <p>Using paired services</p> <p>Primary outcomes</p> <p><b>% of patients</b><br/><b>Discharged following consultation with no further follow up by any health professional</b></p> <p><b>Urgently referred to hospital (both ED or direct admission)</b></p> <p><b>Non-urgently referred to GP or community care</b></p> <p>Secondary outcomes (relevant ones only)</p> <p><b>Episode time from first contact to discharge</b></p> | <p><b>Discharged with no further follow up by any health professional</b><br/>49.2 vs.12.4%<br/>MD 36.8% (95% CI 26.7,46.8)</p> <p><b>Urgently referred to hospital (both ED or direct admission)</b><br/>22.7 vs. 87.6%<br/>MD -64.9% (95% CI -71.8 ,-.58.0)</p> <p><b>Non-urgently referred to GP or community care</b><br/>28.1vs. 0%<br/>28.1% (22.6,33.7)</p> <p><b>Episode time from first contact to discharge median in mins (IQR)</b><br/>60 (40,80) vs. 39 (29,58)<br/>Time ratio<br/>1.36 (1.24,1.49)</p> |

| Author<br>Year<br>Country | Study                                                                                                                                           | Participants                                                                                                                                                                                                                                                                                                                                                                                                                                                                                                                                                                                                                                                                                                                                                                                                                                                                                                                                                                                                                                                                                                                                                                                                                                          | Intervention                                                                                                                                                                                                                                                                                                                                                                                                                                                                                                                                                                                                                                                                                                                                                                                                                                                                                                                                                                                                                                                                                                                                                                                                                                                                                                            | Control                                                                                                                                                                                                                                       | Outcomes assessed                                                                                                                                                                                                                                                                                                                   | Results                                                                                                                                                                                                                                                                                                                                                                                                                                                                                                                                                                                                                                                                                                                                                                                                                                                                              |
|---------------------------|-------------------------------------------------------------------------------------------------------------------------------------------------|-------------------------------------------------------------------------------------------------------------------------------------------------------------------------------------------------------------------------------------------------------------------------------------------------------------------------------------------------------------------------------------------------------------------------------------------------------------------------------------------------------------------------------------------------------------------------------------------------------------------------------------------------------------------------------------------------------------------------------------------------------------------------------------------------------------------------------------------------------------------------------------------------------------------------------------------------------------------------------------------------------------------------------------------------------------------------------------------------------------------------------------------------------------------------------------------------------------------------------------------------------|-------------------------------------------------------------------------------------------------------------------------------------------------------------------------------------------------------------------------------------------------------------------------------------------------------------------------------------------------------------------------------------------------------------------------------------------------------------------------------------------------------------------------------------------------------------------------------------------------------------------------------------------------------------------------------------------------------------------------------------------------------------------------------------------------------------------------------------------------------------------------------------------------------------------------------------------------------------------------------------------------------------------------------------------------------------------------------------------------------------------------------------------------------------------------------------------------------------------------------------------------------------------------------------------------------------------------|-----------------------------------------------------------------------------------------------------------------------------------------------------------------------------------------------------------------------------------------------|-------------------------------------------------------------------------------------------------------------------------------------------------------------------------------------------------------------------------------------------------------------------------------------------------------------------------------------|--------------------------------------------------------------------------------------------------------------------------------------------------------------------------------------------------------------------------------------------------------------------------------------------------------------------------------------------------------------------------------------------------------------------------------------------------------------------------------------------------------------------------------------------------------------------------------------------------------------------------------------------------------------------------------------------------------------------------------------------------------------------------------------------------------------------------------------------------------------------------------------|
| Sun<br>2014<br>USA        | <b>RCT</b><br><br><b>Intervention:</b><br>ED observation syncope protocol<br>n=62<br><br><b>Control:</b><br>Normal In-patient admission<br>n=62 | <b>Inclusion criteria:</b><br>Patients aged ≥ 50 years or older diagnosed with intermediate syncope.<br><br><b>Exclusion criteria</b><br>Patients with a serious condition: symptomatic arrhythmias, myocardial infarction, pulmonary embolism, acute pulmonary edema, stroke, severe anaemia or blood loss requiring blood transfusion, sepsis, and major traumatic injury.<br>Also: seizure, head trauma, or intoxication as reason for loss of consciousness; new/ baseline cognitive impairment; do-not-resuscitate or do-not-intubate status; active chemotherapy and inability to speak either English/Spanish. Met high risk criteria.<br><br><b>Baseline characteristics of participants</b><br>Observation vs. control<br>Mean(SD) or %<br><b>Mean age</b><br>65 (11) vs. 64(11)<br><b>% Female</b><br>53 vs. 48<br><b>Syncope index complaint (vs near syncope)</b><br>74vs. 61%<br><b>Congestive heart failure</b><br>2vs. 3%<br><b>Coronary artery disease</b><br>13vs.8%<br><b>Arrhythmia</b> 8vs.6%<br><b>Syncope in previous yr</b><br>16vs.21%<br><b>Quality of well-being scale</b><br>0.55(0.15) vs. 0.55(0.14)<br><b>Syncope functional status</b><br>29((25) vs.25(26)<br><b>Syncope risk score</b><br>0.76 (0.840 vs.0.76 (0.67) | <b>Outline of intervention</b><br>Patients received continuous cardiac monitoring ≥ 12hrs. ≤2 serial cardiac troponin tests approx. 6 hours apart to exclude acute MI. Rest echocardiogram for patients with cardiac murmur, if not performed in previous 6mths. Additional testing as required. Maximum stay in observation unit could not be more than 24hrs. Observation protocol patients who received a diagnosis detailed in exclusion list or had pending tests at 24hrs were admitted<br><br><b>High Risk Criteria</b><br>Serious condition identified in the ED, History of ventricular arrhythmia, Cardiac device with dysfunction, Exertional syncope, Presentation concerning for acute coronary syndrome, Severe cardiac valve disease (e.g., aortic stenosis <1 cm2), Known cardiac ejection fraction <40%<br>Electrocardiogram findings of QTc>500 mS,pre-excitation, non-sustained ventricular tachycardia, Emergency physician judgment<br><b>Intermediate Risk Criteria</b> No high risk features <b>AND</b> No low risk features <b>AND</b> Clinical judgment by emergency physician that patient requires further diagnostic evaluation<br><b>Low Risk</b> Symptoms consistent with orthostatic or vasovagal syncope, Emergency physician judgment that no further diagnostic evaluation is needed. | <b>Outline of control</b><br>The syncope protocol was not used. Contamination between groups was minimized by being managed in distinct physical spaces by different clinical services.<br><br><b>Intervention delivered by:</b><br>No detail | <b>Relevant measures &amp; outcomes</b><br><br>Primary outcomes<br><b>Inpatient admission rates</b><br><b>Hospital LOS at indexed visit</b><br><br>Secondary outcomes<br><b>30 day and 6mth serious events</b><br><br><b>Index and 30 day hospital costs</b><br><b>30 days changes in QoL</b><br><b>30 day patient satisfaction</b> | <b>Observation vs. s care Inpatient admission rates</b><br>9 (15%) vs. 57 (92%)<br><b>Relative rate 0.16 (95%CI 0.09,0.29, p&lt;0.001)</b><br><b>Hospital LOS at indexed visit mean SD (hrs) 29 (15) vs. 47hrs (34) (p&lt;0.001)</b><br><b>Serious events</b><br><b>During hospital visit</b><br>Death 0 vs. 0<br>Arrhythmia 2 vs. 2<br>Pacemaker insertion 1vs.1<br>Syncope with bone fracture 2 vs.1<br>30 days recurrent syncope 1 vs 1<br>30 day serious outcomes after discharge 2 vs. 0<br>6mth serious outcomes after hospital discharge 4 vs.5<br><b>Costs \$ (SD)</b><br>At index visit 1,400(1,220) vs.2,420(3,930)<br>Within 30 days 1,800(2,150) vs.2,520(3,980)<br><b>Change in quality of life</b> mean SD<br>0 (0.2) vs. 0.03 (0.18)<br><b>Change in syncope functional status</b><br>-7.6(20.1) vs.-2.4(26.3)<br><b>Patient satisfaction</b><br>8.9(1.40 vs.9.3(0.9) |

| Author<br>Year<br>Country                                                                                                                                                                                               | Study                     | Participants                                                                                                            | Intervention                                                                                                                                                                                                                                                                                                                                                                                                                                                                                                                                                                                                                                                                                                                                                                                                                                                                                                                                                                                                             | Control                                                                                                                                                                                                                                                                                                                                                                                                                                                                                                                                                                                                                                                                                                                                                                                                                                                                                                                                                                                                                                                                                                                                                                                  | Outcomes assessed                                                                                                                                                                                                   | Results                                                                                                                                                                                                                                                                                                                                                                                                                                                                                                                                                                                                             |                                                                                                                                                                                                                                                                                                                                                                                                                                                                                                                                                                                                                                                                                                                                                                                                                                            |
|-------------------------------------------------------------------------------------------------------------------------------------------------------------------------------------------------------------------------|---------------------------|-------------------------------------------------------------------------------------------------------------------------|--------------------------------------------------------------------------------------------------------------------------------------------------------------------------------------------------------------------------------------------------------------------------------------------------------------------------------------------------------------------------------------------------------------------------------------------------------------------------------------------------------------------------------------------------------------------------------------------------------------------------------------------------------------------------------------------------------------------------------------------------------------------------------------------------------------------------------------------------------------------------------------------------------------------------------------------------------------------------------------------------------------------------|------------------------------------------------------------------------------------------------------------------------------------------------------------------------------------------------------------------------------------------------------------------------------------------------------------------------------------------------------------------------------------------------------------------------------------------------------------------------------------------------------------------------------------------------------------------------------------------------------------------------------------------------------------------------------------------------------------------------------------------------------------------------------------------------------------------------------------------------------------------------------------------------------------------------------------------------------------------------------------------------------------------------------------------------------------------------------------------------------------------------------------------------------------------------------------------|---------------------------------------------------------------------------------------------------------------------------------------------------------------------------------------------------------------------|---------------------------------------------------------------------------------------------------------------------------------------------------------------------------------------------------------------------------------------------------------------------------------------------------------------------------------------------------------------------------------------------------------------------------------------------------------------------------------------------------------------------------------------------------------------------------------------------------------------------|--------------------------------------------------------------------------------------------------------------------------------------------------------------------------------------------------------------------------------------------------------------------------------------------------------------------------------------------------------------------------------------------------------------------------------------------------------------------------------------------------------------------------------------------------------------------------------------------------------------------------------------------------------------------------------------------------------------------------------------------------------------------------------------------------------------------------------------------|
| 1<br>2<br>3<br>4<br>5<br>6<br>7<br>8<br>9<br>10<br>11<br>12<br>13<br>14<br>15<br>16<br>17<br>18<br>19<br>20<br>21<br>22<br>23<br>24<br>25<br>26<br>27<br>28<br>29<br>30<br>31<br>32<br>33<br>34<br>35<br>36<br>37<br>38 | Benaiges<br>2014<br>Spain | COS<br><br>Intervention:<br>'Day hospital' (DH)<br>n=64<br><br>Control:<br>Conventional<br>hospitalisation (CH)<br>n=36 | <b>Inclusion criteria:</b><br><br>Patients with sustained hyperglycemia (>300 mg/dL) for at least 3 days with or without ketosis<br><br><b>Exclusion criteria</b><br>Ketoacidosis (venous pH <7.31 and/or HCO <sub>3</sub> <22 mEq), hyperosmolar crisis (glycemia >600 mg/dL and effective plasma osmolarity >320 mOsm/L), unstable hemodynamic status or need for ventilatory support, severe precipitating factors such as acute myocardial infarction, stroke, sepsis, social deprivation, and dependence for four or more activities of daily living (Katz index >D).<br><br><b>Baseline characteristics of participants (Stats shown if signif)</b><br>DH vs.CH<br><b>Age</b><br>80.3(4.8)vs. 80.6(4.6)yrs<br><b>Female</b><br>67 vs. 56%<br><b>BMI</b><br>26.1(4.9)vs.25.5(5.1)<br><b>Katz A&amp;B</b><br>72.2vs.72.2%<br><b>Charlson Index</b><br>3.2(2.0)vs. 3.3(1.7)<br><b>Family support</b><br>88.1 vs.97.1%<br><b>Diabetes duration</b><br>14.4 (8.0) vs. 97.1 yrs<br>Plus other specific diabetes measures | <b>Outline of intervention</b><br>Patients assigned to DH if admitted to hospital within DH opening hours (week days 8 am -4 pm); otherwise they were treated in ED and subsequently hospitalized.<br>After initial treatment of hyperglycemic crisis DH patients were scheduled for follow-up visits at 24, 72 hours, and 7 days to adjust treatment and to complete their diabetes education<br><br>Patients were treated with same protocol for both DH and CH: this included initial evaluation with a blood test, urinalysis, chest radiograph to rule out underlying infectious disease, and hourly measurement of glycemia and ketonemia.<br>Treatment included hydration as required, an insulin regimen with insulin, and oral carbohydrate intake if glucose levels were less than 250 mg/dL with persistent ketosis. If infection was diagnosed, treatment was initiated.<br>Diabetes education was delivered by specialist diabetes nurse with specific attention paid to dietary advice, physical activity, and recognition of hypoglycemia.<br>Measurement of glycated hemoglobin (HbA1c) and clinical evaluation was scheduled for 3 & 6 mths for patients in both groups | <b>Outline of control</b><br>At hospital discharge, CH patients were scheduled for a one-week follow-up visit in outpatient clinic.<br><br><b>Intervention delivered by:</b><br>Unclear but normal outpatient staff | <b>Relevant measures &amp; outcomes</b><br>(no distinguishing between primary and secondary outcomes )<br><br>At 3 mth follow up<br><br>[No. of mild or severe hypoglycemic episodes ]<br><br><b>Readmissions for diabetes or unrelated cause</b><br><br>[Nosocomial complications ]<br><br><b>No. of outpatient visits</b><br><br><b>No. of ER visits</b><br><br>[outcomes] not detailed as not relevant to our question<br><br><b>Costs</b><br><br><b>Initial care</b><br><b>Complementary examinations</b><br><b>Pharmacy</b><br><b>Outpatient visits</b><br><b>Readmissions</b><br><b>Total</b><br><br>In euros | Mean (SD)<br>DH vs.CH<br><b>Readmissions for diabetes (%)</b><br><b>1(1.6)vs. 5 (13.9)</b><br><b>P=0.04</b><br>Readmission for any cause (%)<br>4(6.3)vs.7(19.4) p=0.085<br><b>No. of outpatient visits (SE?)</b><br><b>5.0(2.2)vs. 2.5(2.0)</b><br><b>p=0.012</b><br>No. of ER visits (SE?)?<br>0.2(0.6)vs.0.2(0.4)<br>P=0.59<br><b>Costs</b><br><b>Initial care</b><br><b>580.2(489.1) vs.</b><br><b>2,013.6(790.4) p&lt;0.001</b><br><b>Complementary examinations</b><br><b>123.7(276.3) vs. 281.3(188.1)</b><br><b>p=0.007</b><br>Pharmacy<br>12.8(95.6)vs. 20.3(24.8)<br>P=0.676<br>Outpatient visits<br><b>116.7(75.3) vs. 56.9(105.7)</b><br><b>p=0.003</b><br><b>Readmissions (total)</b><br><b>340.8(1190)vs.288.3(916.8)p=</b><br><b>0.835</b><br><b>Total</b><br><b>1,345.1(793.6) vs.</b><br><b>2,212.4(982.5) p&lt;0.001</b> |

| Author<br>Year<br>Country                                                                                                                             | Study                  | Participants                                                                                                                                                                                                                                                                                                                                                                                                                                                                                                                                                                                                                                                                                                                                                                                                                                                                                                                                                                                                                                                                                                         | Intervention                                                                                                                                           | Control                                                                                                                                                                                                                                                                                                                                                                                                                 | Outcomes assessed                                                                                                                                                                                                                                                                                                                                                                                                                                                                                                                    | Results                                                                                                                                                                                                                                                                                                                                                                                                                                                                                                                                                                                                                                                                                                                                                                                                                                                                                                                 |
|-------------------------------------------------------------------------------------------------------------------------------------------------------|------------------------|----------------------------------------------------------------------------------------------------------------------------------------------------------------------------------------------------------------------------------------------------------------------------------------------------------------------------------------------------------------------------------------------------------------------------------------------------------------------------------------------------------------------------------------------------------------------------------------------------------------------------------------------------------------------------------------------------------------------------------------------------------------------------------------------------------------------------------------------------------------------------------------------------------------------------------------------------------------------------------------------------------------------------------------------------------------------------------------------------------------------|--------------------------------------------------------------------------------------------------------------------------------------------------------|-------------------------------------------------------------------------------------------------------------------------------------------------------------------------------------------------------------------------------------------------------------------------------------------------------------------------------------------------------------------------------------------------------------------------|--------------------------------------------------------------------------------------------------------------------------------------------------------------------------------------------------------------------------------------------------------------------------------------------------------------------------------------------------------------------------------------------------------------------------------------------------------------------------------------------------------------------------------------|-------------------------------------------------------------------------------------------------------------------------------------------------------------------------------------------------------------------------------------------------------------------------------------------------------------------------------------------------------------------------------------------------------------------------------------------------------------------------------------------------------------------------------------------------------------------------------------------------------------------------------------------------------------------------------------------------------------------------------------------------------------------------------------------------------------------------------------------------------------------------------------------------------------------------|
| 1<br>2<br>3<br>4<br>5<br>6<br>7<br>8<br>9<br>10<br>11<br>12<br>13<br>14<br>15<br>16<br>17<br>18<br>19<br>20<br>21<br>22<br>23<br>24<br>25<br>26<br>27 | Salvi<br>2008<br>Italy | <p><b>COS (secondary analysis)</b></p> <p><b>Inclusion criteria:</b><br/>Patients aged <math>\geq 65</math> yrs were enrolled in June 2006 from the GED and July 2006 from the CED taking care that none presenting to the ED in the course of the study period was recruited again.</p> <p><b>Exclusion criteria</b><br/>Cognitive impairment (a score of <math>\geq 5</math> on the Short Portable Mental Status Questionnaire SPMSQ) and no proxy,<br/>Those too ill to respond, Trauma patients</p> <p><b>Baseline characteristics of participants</b><br/>CED vs GED<br/>Mean(SD)<br/><b>Age 78.1(7) vs. 82.5(7.20) <math>p &lt; 0.001</math></b><br/><b>Female 47 vs. 68% <math>p &lt; 0.001</math></b><br/><b>Married 70 vs. 40% <math>p &lt; 0.001</math></b><br/>Living alone 12 vs 14<br/><b>Triage code</b><br/>Urgent/semi-urgent (2/3)<br/>97 vs.90 %<br/>Charlson Index 3.3(2.3) vs. 3.4(1.7)<br/><b>SPMSQ</b><br/><b>2.5(3.3) vs. 5.2(4.2) <math>p &lt; 0.001</math></b><br/><b>ADL 4.3(2) vs. 3.2(2.5)</b><br/><b>P=0.001</b></p> <p>No differences in profile of diagnosis in ED between groups</p> | <p><b>Outline of intervention</b><br/>No details beyond ED plus observation unit of 6 beds</p> <p><b>Intervention delivered by:</b><br/>No details</p> | <p><b>Outline of control</b><br/>Patients presenting to ED were screened Mon-Fri 9am- 6pm using standard information sheet.<br/>Interviews conducted with patients or family member/other for patients with cognitive impairment. Written consent &amp; access to medical records was obtained. patients a underwent a brief geriatric assessment using the Charlson Index, SPMSQ, and ADL before the current event</p> | <p><b>Relevant measures &amp; outcomes</b></p> <p><b>Mean duration (SD)</b></p> <p><b>No. of initial admissions</b></p> <p><b>LOS in hospital days</b></p> <p><b>Both of above presented as baseline data</b></p> <p><b>No. ED visits at 30 days and 6 mths</b></p> <p><b>Frequent ED return (<math>\geq 3</math> visits over 6 mths)</b></p> <p><b>No. hospital admissions at 6mths</b></p> <p><b>ADL at 6mths (defined as functional decline)</b></p> <p><b>Mortality at 30 days &amp; 6 mths</b></p> <p><b>Costs</b><br/>None</p> | <p>CED vs. GED<br/><b>Mean duration (SD)</b><br/><b>6.2(4.5) hrs vs. 12.8 (8.5) hrs</b><br/><b><math>P &lt; 0.001</math></b><br/><b>No. of initial admissions</b><br/>53 vs.63 <math>p=0.2</math><br/><b>LOS in days</b><br/>10(6.65) vs. 10.5(7.2) <math>p=0.74</math><br/><b>No. ED visits</b><br/>30 days<br/>25 vs. 23 visits <math>p=0.88</math><br/>6months<br/>51 vs. 42 <math>p=0.25</math><br/><b>Frequent ED return (<math>\geq 3</math> visits over 6 mths)</b><br/>11 vs.13 visits <math>p=0.84</math><br/><b>No. hospital admissions at 6mths</b><br/>36 vs.29 <math>p=0.2</math><br/><b>ADL 20 vs. 20 <math>p=0.34</math></b><br/><b>Mortality</b><br/><b>30 days 8 vs. 5 deaths</b><br/><b>6months 20 vs. 19</b><br/>Statistically significant at 6mths after adjustment for age, sex, living status, admission at time of recruitment Charlson index, SPMSQ and ADL<br/><b><math>p=0.047</math></b></p> |

| Author<br>Year<br>Country     | Study                                                                                                                                                                         | Participants                                                                                                                                                                                                                                                                                                                                                                                                                                                                                                                                                                                                                                                                                                                                                                                                                                                                                                                                                                                                                                                                   | Intervention                                                                                                                                                                                                                                                                                                                                                                                                                                                                                                                                                                                                                                                                                                                                                                                                                                                                                                                                                                                                                                                                                           | Control                                                                                                                                                                                           | Outcomes assessed                                                                                                                                                                                                                                                                                                                                                                                                                                                                                                                                                                                                   | Results                                                                                                                                                                                                                                                                                                                                                                                                                                                                                                                                                                                                                                                                                                                                                                                       |
|-------------------------------|-------------------------------------------------------------------------------------------------------------------------------------------------------------------------------|--------------------------------------------------------------------------------------------------------------------------------------------------------------------------------------------------------------------------------------------------------------------------------------------------------------------------------------------------------------------------------------------------------------------------------------------------------------------------------------------------------------------------------------------------------------------------------------------------------------------------------------------------------------------------------------------------------------------------------------------------------------------------------------------------------------------------------------------------------------------------------------------------------------------------------------------------------------------------------------------------------------------------------------------------------------------------------|--------------------------------------------------------------------------------------------------------------------------------------------------------------------------------------------------------------------------------------------------------------------------------------------------------------------------------------------------------------------------------------------------------------------------------------------------------------------------------------------------------------------------------------------------------------------------------------------------------------------------------------------------------------------------------------------------------------------------------------------------------------------------------------------------------------------------------------------------------------------------------------------------------------------------------------------------------------------------------------------------------------------------------------------------------------------------------------------------------|---------------------------------------------------------------------------------------------------------------------------------------------------------------------------------------------------|---------------------------------------------------------------------------------------------------------------------------------------------------------------------------------------------------------------------------------------------------------------------------------------------------------------------------------------------------------------------------------------------------------------------------------------------------------------------------------------------------------------------------------------------------------------------------------------------------------------------|-----------------------------------------------------------------------------------------------------------------------------------------------------------------------------------------------------------------------------------------------------------------------------------------------------------------------------------------------------------------------------------------------------------------------------------------------------------------------------------------------------------------------------------------------------------------------------------------------------------------------------------------------------------------------------------------------------------------------------------------------------------------------------------------------|
| Garåsen<br>2007/8ab<br>Norway | <b>RCT</b><br><br><b>Intervention:</b><br>Community hospital (CH)<br>n=72 assigned but 8 went<br>on to GH<br><br><b>Control:</b><br>General hospital<br>(GH)admission<br>n=70 | <b>Inclusion criteria:</b><br>Patients aged ≥60 years admitted<br>to general hospital due to acute<br>illness or acute exacerbation of<br>known chronic disease<br><br>Probably in need of in ward care<br>for ≥ 3-4 days<br><br>Admitted from own homes and<br>expected to return home when<br>care finished.<br><br><b>Exclusion criteria</b><br>Severe dementia or a psychiatric<br>disorders needing specialised care<br>24 hours a day.<br><br><b>Baseline characteristics of<br/>participants<br/>(No stats given)</b><br>[including data from<br>n=8 who were assigned CH then<br>went to GH]<br><br>CH vs.GH<br><b>Age</b><br>80.6 (0.8)vs. 81.3(0.8)yrs<br><b>Female</b><br>72 vs.61%<br><b>Living with spouse</b><br>16 vs. 15<br><b>ADL (SD)</b><br>2.24(0.9) vs. 2.05 (0.7)<br><b>Primary diagnosis</b><br><b>Cardio dis</b> 31 vs.29%<br><b>Infect</b> 18vs. 23%<br><b>Fractures/contusions</b><br>19vs. 17%<br><b>Pulmonary disease</b><br>7vs.9%<br><b>Neurological</b> 7 vs.6%<br><b>Cancer</b> 3 vs 6%<br><b>Psychiatric</b> 1vs.0%<br><b>Other</b> 14 vs 11% | <b>Outline of intervention</b><br>On admission to CH the<br>physicians<br>performed a medical<br>examination of the patients<br>and a<br>careful evaluation of<br>available earlier health<br>records from<br>the <b>admitting general<br/>practitioner, the general<br/>hospital physicians and the<br/>community home care<br/>services.</b> The<br>communication with each<br>patient and his family<br>focusing on physical and<br>mental challenges was also<br>essential to understand the<br>needs and level of care.<br>.<br>Assume from the inclusion<br>criteria that all patients<br>came to the general hospital<br>initially then<br><br>' When an eligible patient<br>was identified and accepted<br>for inclusion, a blinded<br>randomisation was<br>performed by the<br>Clinical Research<br>Department at the Faculty<br>of Medicine.'<br><br>All patients randomised for<br>care at the community<br>hospital were transferred<br>from the general<br>hospital within 24 hours<br>after the time of inclusion to<br>the study and immediately<br>after the time of<br>randomisation. | <b>Outline of control</b><br>The care at different<br>departments at GH and<br>communication with<br>primary health care<br>followed the standard<br>routines through the<br>formal organisation. | <b>Relevant measures &amp;<br/>outcomes</b><br><br>Follow up at 26 weeks & 12<br>months<br><br><b>No. of readmission for<br/>index disease</b><br><br><b>Need for community home<br/>care</b><br><br><b>Need for long term nursing<br/>home</b><br><br><b>Need for long term nursing<br/>home</b><br><br><b>No. of days in institutions<br/>after randomisation<br/>[intervention +rehab<br/>+readmissions] data is<br/>available for separate<br/>services</b><br><br><b>No. of deaths</b><br><br><b>No. of days before death</b><br><br><b>No care</b><br><br>12 month data in [0273]<br><br><b>Costs</b><br>None | CH vs. GH No. (%)<br>At 26 weeks<br><b>No. of readmission for index<br/>disease</b><br><b>14(19%) vs. 25 (36%) p=0.02</b><br><b>Need for community home<br/>care</b><br>38(53%) vs. 44(63%) p=0.37<br><b>Need for long term nursing<br/>home</b><br>7(10%) vs. 5(7%)<br>p= 0.76<br><b>No. days in institutions</b><br>31(95% CI 26.1,34.7) vs.29.8<br>(95% CI 23.2,36.4) p=0.80<br><b>No. of deaths</b><br>9(12.5%) vs14(20%) p=0.15<br><b>No. days before death</b><br>165 (95% CI 154-176) vs. 156<br>(95% CI 144,165)<br><b>No care</b><br><b>18(25%) vs. 7(10%) p=0.01</b><br>12 month data<br><b>No. of deaths</b><br><b>13(18.1%) vs. 22 (31.4%)<br/>p=0.03</b><br><b>Total observation period</b><br><b>335.7(95% CI 312.0,359.4) vs.<br/>292.8(95%CI 264.1,321.5)<br/>days p=0.01</b> |

| Author<br>Year<br>Country                                                                                                                                                                                                                                                     | Study                         | Participants                                                                                                                                                                                                                                                                                                                                                                                                                                                                                                                                                                                                                                                                                                                                                                                                                                   | Intervention                                                                                                                                                                                                                                                                                                                                                                                                                                                                                                                                                                                                                                                                                                                                                                                                                                                                                                                                                                    | Control                                                                                                                                                                                   | Outcomes assessed                                                                                                                                                                                                                                                                                                                                      | Results                                                                                                                                                                                                                                                                                                                    |
|-------------------------------------------------------------------------------------------------------------------------------------------------------------------------------------------------------------------------------------------------------------------------------|-------------------------------|------------------------------------------------------------------------------------------------------------------------------------------------------------------------------------------------------------------------------------------------------------------------------------------------------------------------------------------------------------------------------------------------------------------------------------------------------------------------------------------------------------------------------------------------------------------------------------------------------------------------------------------------------------------------------------------------------------------------------------------------------------------------------------------------------------------------------------------------|---------------------------------------------------------------------------------------------------------------------------------------------------------------------------------------------------------------------------------------------------------------------------------------------------------------------------------------------------------------------------------------------------------------------------------------------------------------------------------------------------------------------------------------------------------------------------------------------------------------------------------------------------------------------------------------------------------------------------------------------------------------------------------------------------------------------------------------------------------------------------------------------------------------------------------------------------------------------------------|-------------------------------------------------------------------------------------------------------------------------------------------------------------------------------------------|--------------------------------------------------------------------------------------------------------------------------------------------------------------------------------------------------------------------------------------------------------------------------------------------------------------------------------------------------------|----------------------------------------------------------------------------------------------------------------------------------------------------------------------------------------------------------------------------------------------------------------------------------------------------------------------------|
| 1<br>2<br>3<br>4<br>5<br>6<br>7<br>8<br>9<br>10<br>11<br>12<br>13<br>14<br>15<br>16<br>17<br>18<br>19<br>20<br>21<br>22<br>23<br>24<br>25<br>26<br>27<br>28<br>29<br>30<br>31<br>32<br>33<br>34<br>35<br>36<br>37<br>38<br>39<br>40<br>41<br>42<br>43<br>44<br>45<br>46<br>47 | Vicente<br>2014<br><br>Sweden | <p><b>RCT</b></p> <p><b>Intervention:</b><br/>Going to a community-based hospital<br/>n=410</p> <p><b>Control:</b><br/>Going to ED<br/>n=396</p> <p>.</p> <p><b>Inclusion criteria:</b><br/>No specific information</p> <p><b>Exclusion criteria:</b><br/>No specific information</p> <p>older adults were randomized when they called the emergency number</p> <p><b>Baseline characteristics of participants</b><br/>Intervention vs. control</p> <p><b>Mean age (SD)</b><br/>81 (8) vs. 81(8) yrs</p> <p><b>% Female</b><br/>56 vs. 59%</p> <p><b>Priority level when ambulance sent out (% individuals)</b></p> <p>1. 1.6 vs. 0%</p> <p>2. 59 vs. 47 %</p> <p>3. 39 vs.53%</p> <p>P=0.001</p> <p><b>Priority level when ambulance arrives at hospital (% individuals)</b></p> <p>1. 7.2 vs.3.6%</p> <p>2. 39 vs.35%</p> <p>3.54 vs.61%</p> | <p><b>Outline of intervention</b><br/>The study was conducted over 14 months from Oct 2008 to Dec 2009. Two EMS companies were included in the study. Ambulance personnel at Company 1 had training in and access to the system and tool and could triage eligible individuals to a GW or, a CECC at a CH. By following system and tool &amp; after assessment of the individual's medical situation and care needs, the ambulance nurse was able to decide whether the individual required full ED services or would benefit more from being transported to an assessment at the CH instead.</p> <p><b>Delivered by:</b><br/>The ambulance nurse education are required to have a course of 60 credits includes ≥ 30 credits in Caring Science. The criterion for entering this program is a BSc Caring Science and Nursing. Since 2007, a 1-year Master's Degree &amp; postgraduate Diploma in Specialist Nursing, Prehospital Emergency Care Program has been available.</p> | <p><b>Outline of control</b><br/>Ambulance personnel at Company 2 had no training in the system and tool, and transported all individuals to a full-service ED at a tertiary hospital</p> | <p><b>Relevant measures &amp; outcomes</b></p> <p>Primary outcome:<br/><b>No. of individuals sent direct to CH for either to GW or CECC</b></p> <p>Secondary outcome:<br/><b>No. of subsequent transfers from CH to ED within 24 hrs</b></p> <p>Calculated as Intention to treat (ITT) and per protocol (pp) analysis</p> <p><b>Costs</b><br/>None</p> | <p>Intervention vs. control</p> <p><b>No. of individuals sent direct to CH for either to GW or CECC</b></p> <p>ITT<br/>90/449 20% (16.6,24)</p> <p>PP<br/>56/273 20.5% (16.1,25.7)</p> <p><b>No. of subsequent transfers from CH to ED within 24 hrs</b></p> <p>ITT 6/90 6.7% (3.1,13.8)</p> <p>PP 4/56 7.1 (2.8,17.0)</p> |



| Author<br>Year<br>Country                | Study                                                                                                                                                                                                       | Participants                                                                                                                                                                                                                                                                                                                                                                                                                                                                                                                                                                                                                                                                                                                                                                                                                                                                                                                                                                                                                                                                                                                                                                                                                                                                                                                                                                                                                                                                                                                                                                                                                                                                                                                                                                                                                                                                                                                                                                                                                                                                                                        | Intervention                                                                                                                                                                                                                                                                                                                                                                                                                                                                                                                                                                                                                                                                                                                                                                                                                                                                                                                                                                 | Control                                                                                         | Outcomes assessed                                                                                                                                                                                                                                                                                                                                                                                                                                                                                                                                                                                                                                                                                                                                                                                                                                                          | Results                                                                                                                                                                                                                                                                                                                                                                                                                                                                                                                                           |
|------------------------------------------|-------------------------------------------------------------------------------------------------------------------------------------------------------------------------------------------------------------|---------------------------------------------------------------------------------------------------------------------------------------------------------------------------------------------------------------------------------------------------------------------------------------------------------------------------------------------------------------------------------------------------------------------------------------------------------------------------------------------------------------------------------------------------------------------------------------------------------------------------------------------------------------------------------------------------------------------------------------------------------------------------------------------------------------------------------------------------------------------------------------------------------------------------------------------------------------------------------------------------------------------------------------------------------------------------------------------------------------------------------------------------------------------------------------------------------------------------------------------------------------------------------------------------------------------------------------------------------------------------------------------------------------------------------------------------------------------------------------------------------------------------------------------------------------------------------------------------------------------------------------------------------------------------------------------------------------------------------------------------------------------------------------------------------------------------------------------------------------------------------------------------------------------------------------------------------------------------------------------------------------------------------------------------------------------------------------------------------------------|------------------------------------------------------------------------------------------------------------------------------------------------------------------------------------------------------------------------------------------------------------------------------------------------------------------------------------------------------------------------------------------------------------------------------------------------------------------------------------------------------------------------------------------------------------------------------------------------------------------------------------------------------------------------------------------------------------------------------------------------------------------------------------------------------------------------------------------------------------------------------------------------------------------------------------------------------------------------------|-------------------------------------------------------------------------------------------------|----------------------------------------------------------------------------------------------------------------------------------------------------------------------------------------------------------------------------------------------------------------------------------------------------------------------------------------------------------------------------------------------------------------------------------------------------------------------------------------------------------------------------------------------------------------------------------------------------------------------------------------------------------------------------------------------------------------------------------------------------------------------------------------------------------------------------------------------------------------------------|---------------------------------------------------------------------------------------------------------------------------------------------------------------------------------------------------------------------------------------------------------------------------------------------------------------------------------------------------------------------------------------------------------------------------------------------------------------------------------------------------------------------------------------------------|
| Patel<br>2008<br>Sweden<br>Heart Failure | <b>pilot RCT</b><br><br><b>Intervention:</b> HC<br>Treated at home after<br>>48hrs treatment in ED<br>(n=13)<br><b>Control:</b> CC<br>Treated in hospital as per<br>hospital treatment<br>guidelines (n=18) | <b>Inclusion criteria:</b><br><i>Into study</i><br>Earlier diagnosed with CHF with diastolic<br>or systolic LVD<br>Deterioration of HF ≥3 days with<br>symptoms of increasing dyspnoea,<br>orthopnoea, weight gain≥2 kg, debuting<br>peripheral oedema or abdominal<br>swelling Clinical signs, e.g., extended<br>jugular vein, leg oedema, tachypnoea,<br>pulmonary rales, ascites and third heart<br>sound. At least one symptom and one<br>sign should be present<br>New York Heart Association class II–IV<br><i>for home treatment</i><br>It was considered medically safe to treat<br>patients at home if they had a S-<br>Potassium level 3.4-5.5 mmol/L, systolic<br>blood pressure >95 mm Hg, S<br>Creatinine<250 µmol/L & <50% increase<br>from the baseline value during drug<br>adjustment.<br><b>Exclusion criteria</b><br>Unwillingness to participate<br>Worsening of CHF<3 days<br>Newly onset HF, Pulmonary or pre-<br>pulmonary oedema, Need for<br>monitoring of arrhythmia<br>Other morbidities indicating need for<br>hospitalisation. Living at an institution.<br>Inability to follow instructionsS-<br>Haemoglobin100 g/L or a decrease of S<br>Haemoglobin>20 g/L<br>S-Creatinine>250 µmol/L<br>S-Potassium>5.5 mmol/L or b3.4 mmol/L<br>S-Troponin T>0.05 µg/L<br>Creatine kinase-MB>5 µg/L<br>ASAT and ALAT>three times above the<br>normal value. Systolic blood pressure>95<br>mm Hg Heart rate<45 or >110 beats/min<br><b>Baseline characteristics of<br/>participants</b><br>Male n (%) 6 (46)/7 (54) 15 (83)/3 (17)<br>0.03 Age (years) mean (SD) 77 (10) 78 (8)<br>ns Marital status n (%) Divorced 2 (15) 3<br>(17) ns Single 1 (8) 2 (11) ns Widowed 7<br>(54) 5 (28) ns Education n (%) ≥9 years 1<br>(8) 8 (44) 0.02 ns Weight kg mean (SD)<br>71 (13) 79 (15) ns NT-proBNP pg/ml<br>(median and interquartile range) 4420<br>(1690–14350) 9335 (3375–13350) ns<br>LVEF % mean (SD) 36 (13) 33 (12)<br>Preserved ejection fraction CHF n (%) 3<br>(23) 2 (11) Systolic CHF n (%) 10 (77) 16<br>(89) NYHA class n (%)III 1 (5.5)III 13 (100)<br>16 (89) IV 1 (5.5)<br>truncated | <b>Outline of intervention</b><br><br>Initially treated in the ED for<br>≥48 h & then sent home.<br>The specialist HF nurses<br>followed a written physician<br>directed care plan including<br>adjusting medications. A<br>cardiologist could be<br>consulted. All patients<br>followed-up one day after<br>returning home by nurse.<br>The patients were visited<br>daily or every other day for<br>5–7 days as appropriate.<br>The home visits stopped<br>when: (1) was<br>symptomatically stable or<br>improving,<br>(2) had stable or falling<br>weight, (3) had no signs of<br>pulmonary rales and (4) had<br>no oedema above the ankle.<br>Patients could contact nurse<br>by phone in office hours.<br>Nurses at intensive cardiac<br>care unit could be reached<br>by telephone after office<br>hours. A cardiologist was<br>always available for phone<br>consultation ≤1 month after<br>the last home visit, the<br>nurse was available for<br>phone counselling. | <b>Outline of control</b><br><br>Treated in hospital as<br>per hospital treatment<br>guidelines | <b>Relevant measures &amp;<br/>outcomes</b><br><br>No distinction between<br>primary and secondary<br>outcomes<br><br><b>Clinical status</b> was<br>documented at 1,4,8& 12<br>mths<br><br><b>Direct costs</b> for control<br>group based on<br>compensation paid to<br>hospital and for home care<br>group based on time &<br>activities of nurses &<br>physicians plus lab tests<br>and i.v diuretic episodes<br><br>(2) had stable or falling<br>weight, (3) had no signs of<br>pulmonary rales and (4) had<br>no oedema above the ankle.<br>Patients could contact nurse<br>by phone in office hours.<br>Nurses at intensive cardiac<br>care unit could be reached<br>by telephone after office<br>hours. A cardiologist was<br>always available for phone<br>consultation ≤1 month after<br>the last home visit, the<br>nurse was available for<br>phone counselling. | <b>Results</b><br><br>There was no significant<br>difference in clinical events<br>including readmissions<br>adverse events or in HRQL<br>(measured at baseline too).<br><br>The total cost related to CHF<br>was lower in the HC<br>group after 12 months<br>(p=0.05)<br>detail of costs<br>Euros HC vs. CC<br>Nurse cost 386 (244-1107) vs.<br>N/A<br>Physician 35(19-74) vs. N/A<br>Transport 96953-127) vs. N/A<br>Total cost for care<br>586 (334-1125) vs. 3277<br>(2125-5750)<br><br>Readmissions<br>0.5(0.8) vs. 0.6 (0.8) ns<br>methods) |

| Author<br>Year<br>Country                                                       | Study                                                                                                                                                          | Participants                                                                                                                                                                                                                                                                                                                                                                                                                                                                                                                                                                                                                                                                                                                                                                                                                                                                                                                                                                                                                                                                                                                                                                                                                                                                                                                                                                                                                                                                                                                                                                                                                                                | Intervention                                                                                                                                                                                                                                                                                                                                                                                                                                                                                                                                                                                                                                                                                                                                                                                                                                                                                                                                                                                                                                                                                                                      | Control                                                                                                                                                                                                      | Outcomes assessed                                                                                                                                                                                                                                                                                                                                                                                                                                                                                                                                                                                                                                                                                                                                                                                                                                                                                                                                                                                                                 | Results                                                                                                                                                                                                                                                                                                                                                                                                                                                                                                                                                                                                                           |
|---------------------------------------------------------------------------------|----------------------------------------------------------------------------------------------------------------------------------------------------------------|-------------------------------------------------------------------------------------------------------------------------------------------------------------------------------------------------------------------------------------------------------------------------------------------------------------------------------------------------------------------------------------------------------------------------------------------------------------------------------------------------------------------------------------------------------------------------------------------------------------------------------------------------------------------------------------------------------------------------------------------------------------------------------------------------------------------------------------------------------------------------------------------------------------------------------------------------------------------------------------------------------------------------------------------------------------------------------------------------------------------------------------------------------------------------------------------------------------------------------------------------------------------------------------------------------------------------------------------------------------------------------------------------------------------------------------------------------------------------------------------------------------------------------------------------------------------------------------------------------------------------------------------------------------|-----------------------------------------------------------------------------------------------------------------------------------------------------------------------------------------------------------------------------------------------------------------------------------------------------------------------------------------------------------------------------------------------------------------------------------------------------------------------------------------------------------------------------------------------------------------------------------------------------------------------------------------------------------------------------------------------------------------------------------------------------------------------------------------------------------------------------------------------------------------------------------------------------------------------------------------------------------------------------------------------------------------------------------------------------------------------------------------------------------------------------------|--------------------------------------------------------------------------------------------------------------------------------------------------------------------------------------------------------------|-----------------------------------------------------------------------------------------------------------------------------------------------------------------------------------------------------------------------------------------------------------------------------------------------------------------------------------------------------------------------------------------------------------------------------------------------------------------------------------------------------------------------------------------------------------------------------------------------------------------------------------------------------------------------------------------------------------------------------------------------------------------------------------------------------------------------------------------------------------------------------------------------------------------------------------------------------------------------------------------------------------------------------------|-----------------------------------------------------------------------------------------------------------------------------------------------------------------------------------------------------------------------------------------------------------------------------------------------------------------------------------------------------------------------------------------------------------------------------------------------------------------------------------------------------------------------------------------------------------------------------------------------------------------------------------|
| Mendoza<br>2009<br>Garcia-<br>Soletto<br>2013<br><br>Spain<br><br>Heart Failure | RCT<br><br><b>Intervention:</b><br>Hospital at home (HAH)<br>care (n=37)<br><b>Control:</b><br>Inpatient hospital care<br>(IHC) in a cardiology unit<br>(n=34) | <b>Inclusion criteria:</b><br>Patient of 65 years and over<br>With diagnosis and prognosis<br>evaluation of HF since at least 12<br>months prior to the study<br>NYHA functional class II or III<br>before coming to ED due to<br>exacerbation<br><b>Exclusion criteria</b><br>Admitted in the preceding 2<br>months for deterioration of HF or<br>acute coronary syndrome<br>Presence of severe symptoms such<br>as sudden worsening of HF<br>Poor prognosis factors<br>(haemodynamic instability, severe<br>arrhythmia, baseline creatinine<br>above 2.5 mg/dL)<br>No response to treatment in the<br>ED<br>Active cancer, severe dementia, or<br>any other disease at an advanced<br>stage indicating life expectancy of<br>less than 6 months<br>Acute psychiatric diseases, active<br>alcoholism<br>Active pulmonary tuberculosis<br>Those living in a psycho-geriatric<br>institution<br>No guarantee of all-day<br>supervision<br>Absence of a telephone at home or<br>living more than 10 km from the<br>hospital<br><b>Baseline characteristics of<br/>participants IHC vs. HaH</b><br>Women, n (%) 10 (29.4) 19 (51.4)<br>0.06 Age, mean +SD 79.9+6.3<br>78.1+6.2 0.20 Admissions for HF in<br>previous year 0.41+0.86 0.65+0.86<br>0.13 O2 saturation in ED 91.4+5.2<br>93.2+4.6 0.12 Functional Class<br>NYHA II, n (%) 23 (67.6) 19 (51.4)<br>Functional Class NYHA<br>III, n (%) 11 (32.4) 18 (48.6) 0.16<br>Atrial fibrillation, n (%) 16 (47) 21<br>(56.8) 0.49 LVEF ≥45%, n (%) 24<br>(70) 23 (62.1) LVEF, <45%, n (%)<br>10 (29.4) 14 (37.8) 0.13 NT-proBNP<br>(pg/mL) 4056+5352 3864+3720<br>0.86 Charlson index 2.1+1.3<br>2.5+1.5 0.35 | <b>Outline of intervention</b><br>Characteristics of the HaH<br>unit explained whilst still in<br>ED. Given information sheet<br>with contact phone<br>numbers. Within 12–24 h of<br>the ED visit, patients<br>received scheduled & if<br>necessary, urgent visits to<br>their homes from an<br>internal medicine specialist<br>& a nurse, (staff of the HaH<br>unit). If deterioration<br>occurred outside the<br>working hours (8am–9 pm<br>every day of yr), patients &<br>family were instructed to<br>call 112 to explain they<br>were HaH patients.<br>Samples were taken for lab<br>tests and ECGs were<br>performed in patient's<br>home<br><br>X-ray & echocardiography at<br>hospital was as<br>accessible for HaH patients<br>as for in-patients. Generally<br>all patients were visited<br>daily by a specialist nurse.<br>Patients were visited by a<br>physician daily or every<br>other day depending on<br>condition. Treatment in HaH<br>finished with referral to<br>primary care after<br>recovery or, in case of<br>deterioration or no<br>response to treatment, with<br>transfer to the cardiology<br>ward. | <b>Outline of control</b><br>Patients were admitted<br>to hospital, cardiology<br>ward & were managed<br>by the usual staff of<br>cardiology specialists<br>and nurses, in<br>accordance with<br>guidelines. | <b>Relevant measures &amp;<br/>outcomes</b><br><br>No distinction between<br>primary and secondary<br>outcomes<br><br><b>Effectiveness</b><br>Necessity to transfer the<br>patient from HaH to IHC<br>during the first admission<br>Mortality due to any cause,<br>re-admission due to HF, or<br>another cardiovascular<br>event (stroke, acute<br>coronary syndrome, and<br>coronary revascularization)<br>during 1 year of follow-up.<br>Functional status -Barthel<br>index<br>Health-related quality of life<br>-SF-36 since first admission<br>up to 12 months later<br><br><b>Costs</b><br>Cost of the stay<br>Medication, diagnostic tests<br>(electrocardiography,<br>echocardiography,<br>laboratory tests, and chest<br>X-ray), consumables, and<br>transport.<br>visits to HF clinic, primary<br>care physician or ED, as well<br>as re-admissions.<br>For re-hospitalizations, the<br>cost of the admission was<br>estimated as the average<br>cost per day incurred during<br>the first admission for each<br>group. | Clinical outcomes were similar<br>after initial admission and also<br>after the 12 months of follow-<br>up.<br><br>Death or re-admission due to<br>HF or a cardiovascular event<br>occurred in 19 patients in IHC<br>and 20 in HaH (P=0.88).<br><br>Changes in functional status<br>and health-related quality of<br>life over the follow-up period<br>were not significantly<br>different.<br><br>Average cost<br>of initial admission<br>4502±2153E in IHC and<br>2541±1334E in HaH (P< 0.001).<br><br>During 12 months of<br>follow-up, the average<br>expenditure was 4619+7679E<br>and 3425+4948E (P= 0.83)<br>respectively. |

| Author<br>Year<br>Country                                                                                                                                                                                   | Study                                         | Participants                                                                                                                                                                                                                          | Intervention                                                                                                                                                                                                                                                                                                                                                                                                                                                                                                                                                                                                                                                                                                                                                                                                                                                                                                                                                                                                                                                                                                                                                                                                                                                                                                                                                                                                                                                             | Control                                                                                                                                                                                                                                                                                                                                                                                                                                                                                                                                                                                                                                                                                                                                                                                                                                                                                                                                                                                                                                                                                                                                                                                                                                            | Outcomes assessed                                                                                                                                                                                                                           | Results                                                                                                                                                                                                                                                                                                                                 |                                                                                                                                                                                                                                                                                                                                                                                                                                                                                                                                                                                                                                                                                                                                                                          |
|-------------------------------------------------------------------------------------------------------------------------------------------------------------------------------------------------------------|-----------------------------------------------|---------------------------------------------------------------------------------------------------------------------------------------------------------------------------------------------------------------------------------------|--------------------------------------------------------------------------------------------------------------------------------------------------------------------------------------------------------------------------------------------------------------------------------------------------------------------------------------------------------------------------------------------------------------------------------------------------------------------------------------------------------------------------------------------------------------------------------------------------------------------------------------------------------------------------------------------------------------------------------------------------------------------------------------------------------------------------------------------------------------------------------------------------------------------------------------------------------------------------------------------------------------------------------------------------------------------------------------------------------------------------------------------------------------------------------------------------------------------------------------------------------------------------------------------------------------------------------------------------------------------------------------------------------------------------------------------------------------------------|----------------------------------------------------------------------------------------------------------------------------------------------------------------------------------------------------------------------------------------------------------------------------------------------------------------------------------------------------------------------------------------------------------------------------------------------------------------------------------------------------------------------------------------------------------------------------------------------------------------------------------------------------------------------------------------------------------------------------------------------------------------------------------------------------------------------------------------------------------------------------------------------------------------------------------------------------------------------------------------------------------------------------------------------------------------------------------------------------------------------------------------------------------------------------------------------------------------------------------------------------|---------------------------------------------------------------------------------------------------------------------------------------------------------------------------------------------------------------------------------------------|-----------------------------------------------------------------------------------------------------------------------------------------------------------------------------------------------------------------------------------------------------------------------------------------------------------------------------------------|--------------------------------------------------------------------------------------------------------------------------------------------------------------------------------------------------------------------------------------------------------------------------------------------------------------------------------------------------------------------------------------------------------------------------------------------------------------------------------------------------------------------------------------------------------------------------------------------------------------------------------------------------------------------------------------------------------------------------------------------------------------------------|
| 1<br>2<br>3<br>4<br>5<br>6<br>7<br>8<br>9<br>10<br>11<br>12<br>13<br>14<br>15<br>16<br>17<br>18<br>19<br>20<br>21<br>22<br>23<br>24<br>25<br>26<br>27<br>28<br>29<br>30<br>31<br>32<br>33<br>34<br>35<br>36 | Tibaldi<br>2009<br>Italy<br><br>Heart Failure | <p><b>single blind RCT</b></p> <p><b>Intervention:</b><br/>Physician led - Geriatric Home Hospitalization Service (GHHS; n=48)</p> <p><b>Control:</b><br/>Patients were randomly assigned to the general medical ward (GMW; n=53)</p> | <p><b>Inclusion criteria:</b><br/>≥75 years with a pre-existing diagnosis of CHF (stage C AHA) &amp; persistent functional impairment indicative of NYHA class III or IV status presenting at hospital ED for acute decompensation (defined) &amp; in need of hospital care. Additional inclusion criteria were appropriate care supervision at home, telephone connection, living in the hospital at- home catchment area, informed consent, at least 1 previous admission for acute CHF, and need for intravenous drug infusion.</p> <p><b>Exclusion criteria</b><br/>New-onset heart failure; absence of family and social support; need for mechanical ventilation, hemodialysis, or intensive monitoring; severe dementia ; terminal malignant neoplasm; severe renal impairment; hepatic failure; serum hemoglobin level less than 9 g/dL; and planned cardiac surgery(eg, valve replacement).</p> <p><b>Baseline characteristics of participants</b><br/>Long list of demographic &amp; clinical baseline – truncated GHHS vs. GMW<br/>Mean age 82.2 (5.2) vs. 80.1(4.9) p=0.04<br/>Male (%) 22(46) vs. 30 (57)<br/>Married (%) 22 (46) vs. 24 (45)<br/>Family support at home (%) 48(100) vs. 53(100)<br/>Length of disease (yr) 5.4 (4.7) vs. 5.2 (4.7) plus clinical symptoms both cardiovascular &amp; general including functional status (Barthel index) depression (GDS) MMSE, MNA, comorbidity measured by CIRS 3.6 (1) vs. 3.4 (2) All ns except age</p> | <p><b>Outline of intervention</b><br/>The team has 7 cars, is multidisciplinary and consists: 4 geriatricians, 13 nurses, 3 physio-therapists, 1 social worker &amp;1 counselor working together as a team, with daily meetings 7 days a week. In ED all necessary diagnostic tests are provided and then the patient moves home by ambulance, usually within a few hours. Medical consultation with other hospital specialists is possible in the hospital or at the home of the patient. Treatments included physician and nurse visits, standard blood tests, pulse oximetry, spirometry, electrocardiography, echocardiography etc (as per hospital) Patients treated at home and family members obtained adequate Education e.g. early recognition of symptoms. Protocols for prevention of nosocomial infections, bed sores, and immobilization are routinely adopted for frail elderly inpatients. In the first days after admission to GHHS patient was visited at home on a daily basis by physicians and nurses. In the following days this care is tapered off as appropriate Consultation with cardiologists or other hospital specialists was possible. Physicians and nurses were available at all times for urgent home visits.</p> | <p><b>Outline of control</b><br/>The inpatient control group (GMW) received routine hospital care. Protocols for prevention of nosocomial infections, bed sores, and immobilization are routinely adopted for frail elderly inpatients.</p> | <p><b>Relevant measures &amp; outcomes</b></p> <p><b>Primary outcome</b><br/>Mortality at 6 months.</p> <p><b>Secondary outcomes</b><br/>morbidity (infections, delirium, bed sores, deep vein thrombosis, and falls) during hospitalization, admissions to a nursing home, and subsequent hospital admissions related to any cause</p> | <p><b>Primary outcomes</b><br/>Patient mortality at 6 months was 15% in the total sample, without significant differences between the 2 settings of care. ( 7 vs. 8 deaths )</p> <p><b>Secondary outcomes</b><br/>The number of subsequent hospital admissions was not statistically different in the 2 groups 8 (17%) vs. 18 (34%)</p> <p>mean (SD) time to first additional admission was longer for the GHHS patients (84.3 [22.2] days vs 69.8[36.2] days, <math>P=0.02</math>).</p> <p>Only the GHHS patients experienced improvements in Depression (GDS) +1.48 (1.860 vs. +0.12 (3.36) <math>p=0.02</math>) nutritional status (MNA) - 0.86(1.12) vs. -0.27 (1.78) <math>p=0.05</math> Quality-of-life(NHP) +1.09 (2.57 vs. +0.18 (1.94) <math>p=0.046</math></p> |

| Author<br>Year<br>Country                                                                                                                                                                                                                                                     | Study                            | Participants                                                                                                                                                                                                                                                                                                                                                                                                                                                                                                                                                                                                                                                                                                                                                                                                                                                                                                                                                                                                                                                                                                                                                                                                                                                                                                                                                                                                                                                                                                                                                                                                                                                                                                                                                                                                                                                                                                                               | Intervention                                                                                                                                                                                                                                                                                                                                                                                                                                                                                                                                                                                                                                                                                                                                                                                                                                                                                                                                                                                                                                                                                                                                                                               | Control                                                                                                                               | Outcomes assessed                                                                                                                                                                                                                                                                                                                                                                                                                                                                                                                                                                                                                                                   | Results                                                                                                                                                                                                                                                                                                                                                                                                                                                                                                                                                                                                                                                                                         |
|-------------------------------------------------------------------------------------------------------------------------------------------------------------------------------------------------------------------------------------------------------------------------------|----------------------------------|--------------------------------------------------------------------------------------------------------------------------------------------------------------------------------------------------------------------------------------------------------------------------------------------------------------------------------------------------------------------------------------------------------------------------------------------------------------------------------------------------------------------------------------------------------------------------------------------------------------------------------------------------------------------------------------------------------------------------------------------------------------------------------------------------------------------------------------------------------------------------------------------------------------------------------------------------------------------------------------------------------------------------------------------------------------------------------------------------------------------------------------------------------------------------------------------------------------------------------------------------------------------------------------------------------------------------------------------------------------------------------------------------------------------------------------------------------------------------------------------------------------------------------------------------------------------------------------------------------------------------------------------------------------------------------------------------------------------------------------------------------------------------------------------------------------------------------------------------------------------------------------------------------------------------------------------|--------------------------------------------------------------------------------------------------------------------------------------------------------------------------------------------------------------------------------------------------------------------------------------------------------------------------------------------------------------------------------------------------------------------------------------------------------------------------------------------------------------------------------------------------------------------------------------------------------------------------------------------------------------------------------------------------------------------------------------------------------------------------------------------------------------------------------------------------------------------------------------------------------------------------------------------------------------------------------------------------------------------------------------------------------------------------------------------------------------------------------------------------------------------------------------------|---------------------------------------------------------------------------------------------------------------------------------------|---------------------------------------------------------------------------------------------------------------------------------------------------------------------------------------------------------------------------------------------------------------------------------------------------------------------------------------------------------------------------------------------------------------------------------------------------------------------------------------------------------------------------------------------------------------------------------------------------------------------------------------------------------------------|-------------------------------------------------------------------------------------------------------------------------------------------------------------------------------------------------------------------------------------------------------------------------------------------------------------------------------------------------------------------------------------------------------------------------------------------------------------------------------------------------------------------------------------------------------------------------------------------------------------------------------------------------------------------------------------------------|
| 1<br>2<br>3<br>4<br>5<br>6<br>7<br>8<br>9<br>10<br>11<br>12<br>13<br>14<br>15<br>16<br>17<br>18<br>19<br>20<br>21<br>22<br>23<br>24<br>25<br>26<br>27<br>28<br>29<br>30<br>31<br>32<br>33<br>34<br>35<br>36<br>37<br>38<br>39<br>40<br>41<br>42<br>43<br>44<br>45<br>46<br>47 | Ricauda<br>2008<br>Italy<br>COPD | <p><b>Single blind RCT</b></p> <p><b>Intervention:</b><br/>Geriatric home hospitalization service (GHHS, n=52)</p> <p><b>Control:</b><br/>General medical ward (GMW, n=52)</p> <p><b>Inclusion criteria:</b><br/>Patients ≥75 yrs with a diagnosis of acute exacerbation of COPD, defined on Anthonisen criteria as an increase in breathlessness, sputum volume, or purulence for at least 24 hours, admitted to the ED &amp; requiring hospitalization. Additional inclusion criteria were appropriate care supervision in the home, telephone connection, living in the HaH &amp; informed consent.</p> <p><b>Exclusion criteria</b><br/>Absence of family and social support; severe hypoxemia (partial pressure of oxygen &lt;50 mmHg); severe acidosis or alkalosis (pH &lt;7.35 or &gt;7.55); suspected pulmonary embolism; suspected myocardial infarction; severe comorbid illness as defined by presence of need for hemodialysis, severe renal impairment (glomerular filtration rate &lt;20 mL/min), cancer (except skin cancer), hepatic failure, or severe dementia (Mini-Mental State Examination score &lt;14).</p> <p><b>Baseline characteristics of participants</b><br/>Intervention vs. control<br/>Age, mean ±SD 80.1 ±3.2 79.2 ± 3.1 p=0.20 Male, n (%) 29 (56) 39 (75) p=0.06 Married, n (%) 27 (52) 29 (56) .84 Family support n (%) 52 (100) 52 (100) p=0.89 Current smoker, n (%) 7(13) 6(11) p=0.97 Ex-smoker, n (%) 34 (65) 35 (67) p=0.95 FEV1, mean ±SD 0.92 ±0.4 1.04 ± 0.5 p=0.18 % of predicted FEV1 38, 47 Home oxygen use, n(%) 18 (35) 12 (23) p=0.45 Arterial blood gas, mean ±SD pH 7.40 ± 0.04 7.41 ± 0.03 .19 PP of O<sub>2</sub> 69 ± 19 65 ±14 .p= 0.23 PP of CO<sub>2</sub> 44 ± 12 46 ± 12 .47 ADL score, mean ± SD ± 2.3 ± 2.2 1.9 ± 2.2 p=0.36 IADL score, mean ± SD 7.1 ± 4.9 8.1 ± 4.2 .27 GDS score, mean ± SD 16.1 ± 6.1 17.2 ± 6.8 .45 Comorbidity index 2.6 ± 1.5 3.0 ± 1.8 p=0.24</p> | <p><b>Outline of intervention</b><br/><b>Intervention delivered by:</b><br/>"a physician-led substitutive hospital-at-home model of care"</p> <p>Patients assigned to HaH were immediately transferred home by ambulance. At home, a multi-dimensional geriatric assessment was conducted &amp; patients received hospital-level treatment &amp; services, as their condition dictated. (Physician and nursing visits, standard blood tests, pulse oximetry, electrocardiogram, spirometry, echocardiogram, echographs and Doppler ultrasonographs, oral &amp; intravenous medication administration, including antimicrobials &amp; cytotoxic drugs, oxygen therapy, blood products transfusion, central venous access, surgical treatment of pressure sores, physical therapy &amp; occupational therapy</p> <p>The HaH program emphasized patient &amp; caregiver education about the knowledge of the disease, giving advice about smoking cessation, nutrition, management of activities of daily living &amp; energy conservation, understanding &amp; use of drugs, health maintenance, &amp; early recognition of triggers of exacerbation that required medical intervention.</p> | <p><b>Outline of control</b><br/><b>Intervention delivered by:</b><br/>The inpatient control group received routine hospital care</p> | <p><b>Relevant measures &amp; outcomes</b></p> <p><b>Primary outcomes</b><br/>Hospital readmission &amp; mortality rates at 6 months.</p> <p><b>Secondary outcomes</b><br/>Depression status -Geriatric Depression Scale, functional status- Katz activities of daily living &amp; Lawton instrumental activities of daily living<br/>Cognitive status -Mini-Mental State Examination, Quality of life -the Nottingham Health Profile<br/>Nutritional status -Mini Nutritional Assessment, Caregiver characteristics - Relatives' Stress Scale, &amp; satisfaction using ad hoc questionnaire for Scale.<br/>Costs of care were compared for the acute episode.</p> | <p><b>Primary outcomes</b><br/>GHHS vs. GMW<br/>Hospital readmissions at 6mths 42% vs 87%, P= 0.001<br/>Cumulative mortality at 6 mths was 20.2% in the total sample, No significant differences between grps.</p> <p><b>Secondary outcomes</b><br/>Mean length of stay 15.5 ±9.5 vs 11.0 ± 7.9 days, P= 0.010<br/>Only GHHS patients experienced improvements in depression and QoL scores but ns between grps<br/>There were no differences in functional, cognitive, nutritional, or caregiver burden outcomes.<br/>Satisfaction at discharge was very good or excellent for 94% vs. 88% (P=0.83)<br/>(On a cost per patient per day basis, (\$101.4 ± 61.3 vs \$151.7 ± 96.4, P=0.002).</p> |

| Author<br>Year<br>Country                                                                                                                                                                                         | Study                                                                | Participants                                                                                                                           | Intervention                                                                                                                                                                                                                                                                                                                                                                                                                                                                                                                                                                                                                                                                                                                                                                                                                                                                                                                                                                                                                                                                                                                                                                                                                                                                                                                                                                              | Control                                                | Outcomes assessed                                 | Results                                                                                                                                                                                                                                                                  |                                                                                                                                                                                                                                                                                                                                                                                                                                                                                                                                                                                                                                                                                                                                                                                                                                                              |
|-------------------------------------------------------------------------------------------------------------------------------------------------------------------------------------------------------------------|----------------------------------------------------------------------|----------------------------------------------------------------------------------------------------------------------------------------|-------------------------------------------------------------------------------------------------------------------------------------------------------------------------------------------------------------------------------------------------------------------------------------------------------------------------------------------------------------------------------------------------------------------------------------------------------------------------------------------------------------------------------------------------------------------------------------------------------------------------------------------------------------------------------------------------------------------------------------------------------------------------------------------------------------------------------------------------------------------------------------------------------------------------------------------------------------------------------------------------------------------------------------------------------------------------------------------------------------------------------------------------------------------------------------------------------------------------------------------------------------------------------------------------------------------------------------------------------------------------------------------|--------------------------------------------------------|---------------------------------------------------|--------------------------------------------------------------------------------------------------------------------------------------------------------------------------------------------------------------------------------------------------------------------------|--------------------------------------------------------------------------------------------------------------------------------------------------------------------------------------------------------------------------------------------------------------------------------------------------------------------------------------------------------------------------------------------------------------------------------------------------------------------------------------------------------------------------------------------------------------------------------------------------------------------------------------------------------------------------------------------------------------------------------------------------------------------------------------------------------------------------------------------------------------|
| 1<br>2<br>3<br>4<br>5<br>6<br>7<br>8<br>9<br>10<br>11<br>12<br>13<br>14<br>15<br>16<br>17<br>18<br>19<br>20<br>21<br>22<br>23<br>24<br>25<br>26<br>27<br>28<br>29<br>30<br>31<br>32<br>33<br>34<br>35<br>36<br>37 | Rodriguez-Cerillo<br>2009<br>Spain<br>non-massive Pulmonary embolism | COS<br><br><b>Intervention:</b><br>Home hospitalization (HH) (n=30)<br><br><b>Control:</b><br>Conventional Hospitalization (CH) (n=31) | <b>Inclusion criteria:</b><br><i>For trial</i><br>Non-massive pulmonary embolism<br><ul style="list-style-type: none"> <li>No contraindications for treatment with low MW heparin</li> <li>Absence of moderate to severe renal failure</li> <li>Haemodynamic stability</li> <li>O2 saturation higher than 92% breathing room air</li> <li>No signs of heart failure</li> <li>No arrhythmia</li> <li>No haemoptysis</li> </ul> <i>For HH</i> <ul style="list-style-type: none"> <li>Agreement to admission to our HH unit</li> <li>A valid caregiver at home</li> <li>Residence in our health area</li> <li>A condition amenable to home management</li> </ul> <b>Exclusion criteria</b><br>massive PE, haemodynamic instability, oxygen saturation lower than 92% on room air, heart failure, haemoptysis, arrhythmia & contraindication for treatment with low MW heparin<br><b>Baseline characteristics of participants</b><br>Age 66.8 (27–91) 66.7 (31–90) n.s<br>Sex (males) 30% 54.8% n.s<br>Diagnosed neoplasm 13.3% 9.7% n.s<br>Associated DVT 40% 29% n.s<br>Prior TED 0% 19.3% 0.05<br>Dementia 23.3% 6.4% n.s.<br>Hypertension 30% 45.1% n.s.<br>Ischaemic heart disease 6.6% 9.6% n.s.<br>Thrombophilia 3.3% 0% n.s<br>Recent surgery 3.3% 6.4% n.s<br>Unilateral involvement 70% 61.3% n.s<br>Bilateral involvement 30% 38.7% n.s<br>Diagnosed by helical CT 26.6% 38.7% n.s | <b>Outline of intervention</b><br><br><b>No detail</b> | <b>Outline of control</b><br><br><b>No detail</b> | <b>Relevant measures &amp; outcomes</b><br><br>No distinction between Primary and secondary outcomes<br><br>Major and minor bleeding<br>Re-thrombosis,<br>Clinical course<br>Unexpected returns to hospital<br>Need for hospital re-admission in the following 3 months. | All comparisons ns<br><br>Mean stay length HH vs. CH 8.9 days (7–14 days), vs. 10.6 days (6–20 days).<br><br>All patients in study had a favourable clinical course.<br><br>No major bleeding, re-thrombosis, or death occurred.<br><br>One patient on HH experienced an abdominal wall haematoma in the area of administration of the low MW heparin.<br><br>One patient admitted to hospital experienced a haematoma in the right arm related to blood sampling for laboratory tests.<br><br>No patient with HH had infectious complications. Three patients admitted to hospital were diagnosed of urinary tract infection.<br><br>No HH patients required unexpected return to hospital during admission.<br><br>During follow-up, two patients required hospital admission, one in each group. The cause was not related to the thromboembolic disease. |

| Author<br>Year<br>Country                                                                                                                                                                                                                                                     | Study                                   | Participants                                                                                                                                                                                                                          | Intervention                                                                                                                                                                                                                                                                                                                                                                                                                                                                                                                                                                                                                                                                                                                                                                                                                                                                                                                                                                                                                                                                                                                                                                                                                                                                                                                                                                                                                                                                                                                | Control                                                                                                                                                                                                                                                                                                                                                                                                                                                                                                                                                                                                                                                                                                                                                                                                        | Outcomes assessed                                                                                                                                                                                                                                                                                                                                                                                                                                                                                                                                                                                                                                                                                                                                                                                                                                                                                                                                                              | Results                                                                                                                                                                                                                                                                                                                                                                                                                                                                                                                                                                                                                                         |                                                                                                                                                                                                                                                                                                                                                                                                                                                                                                                                                                         |
|-------------------------------------------------------------------------------------------------------------------------------------------------------------------------------------------------------------------------------------------------------------------------------|-----------------------------------------|---------------------------------------------------------------------------------------------------------------------------------------------------------------------------------------------------------------------------------------|-----------------------------------------------------------------------------------------------------------------------------------------------------------------------------------------------------------------------------------------------------------------------------------------------------------------------------------------------------------------------------------------------------------------------------------------------------------------------------------------------------------------------------------------------------------------------------------------------------------------------------------------------------------------------------------------------------------------------------------------------------------------------------------------------------------------------------------------------------------------------------------------------------------------------------------------------------------------------------------------------------------------------------------------------------------------------------------------------------------------------------------------------------------------------------------------------------------------------------------------------------------------------------------------------------------------------------------------------------------------------------------------------------------------------------------------------------------------------------------------------------------------------------|----------------------------------------------------------------------------------------------------------------------------------------------------------------------------------------------------------------------------------------------------------------------------------------------------------------------------------------------------------------------------------------------------------------------------------------------------------------------------------------------------------------------------------------------------------------------------------------------------------------------------------------------------------------------------------------------------------------------------------------------------------------------------------------------------------------|--------------------------------------------------------------------------------------------------------------------------------------------------------------------------------------------------------------------------------------------------------------------------------------------------------------------------------------------------------------------------------------------------------------------------------------------------------------------------------------------------------------------------------------------------------------------------------------------------------------------------------------------------------------------------------------------------------------------------------------------------------------------------------------------------------------------------------------------------------------------------------------------------------------------------------------------------------------------------------|-------------------------------------------------------------------------------------------------------------------------------------------------------------------------------------------------------------------------------------------------------------------------------------------------------------------------------------------------------------------------------------------------------------------------------------------------------------------------------------------------------------------------------------------------------------------------------------------------------------------------------------------------|-------------------------------------------------------------------------------------------------------------------------------------------------------------------------------------------------------------------------------------------------------------------------------------------------------------------------------------------------------------------------------------------------------------------------------------------------------------------------------------------------------------------------------------------------------------------------|
| 1<br>2<br>3<br>4<br>5<br>6<br>7<br>8<br>9<br>10<br>11<br>12<br>13<br>14<br>15<br>16<br>17<br>18<br>19<br>20<br>21<br>22<br>23<br>24<br>25<br>26<br>27<br>28<br>29<br>30<br>31<br>32<br>33<br>34<br>35<br>36<br>37<br>38<br>39<br>40<br>41<br>42<br>43<br>44<br>45<br>46<br>47 | Carratala<br>2005<br>Spain<br>Pneumonia | <b>Open RCT</b><br><br><b>Intervention:</b><br>Outpatient care with oral levofloxacin therapy or hospitalization with sequential intravenous and oral levofloxacin therapy. (n=110)<br><br><b>Control:</b><br>Hospitalisation (n=114) | <b>Inclusion criteria:</b><br>All immunocompetent patients who were at least 18 years of age and had received a diagnosis of community acquired pneumonia in the emergency department (24 hrs per day, 7 days per week)<br><br>Community acquired pneumonia was defined as the presence of a new infiltrate on chest radiography plus at least 1 of the following: fever (temperature $\geq 38.0$ °C) or hypothermia (temperature $< 35.0$ °C), new cough with or without sputum production, pleuritic chest pain, dyspnea, or altered breath sounds on auscultation.<br><b>Exclusion criteria</b><br><br>Neutropenia, HIV infection, transplantation, or splenectomy or who were taking immunosuppressive drugs<br><br><b>Baseline characteristics of participants</b><br>Male 69 (62.7) 66 (57.9)<br>Female 41 (37.3) 48 (42.1)<br>Mean age $\pm$ SD, $\gamma$ 67.5 $\pm$ 11.8 64.9 $\pm$ 13.4<br>Alcohol consumption $\pm 80$ g/d, <i>n</i> (%) 13 (12.4) 7 (6.4)<br>Current tobacco smoking, <i>n</i> (%)# 21 (19.8) 24 (21.8)<br>Influenza vaccine in current season, <i>n</i> (%)§ 44 (42.7) 49 (46.2)<br>Pneumococcal vaccine in the previous 5 yrs, <i>n</i> (%) $\pm$ 15 (15.6) 13 (13.1)<br>Comorbid conditions, <i>n</i> (%) 71 (64.5) 78 (68.4)<br>Mean oxygen saturation $\pm$ SD, % 94.5 $\pm$ 2.0 94.5 $\pm$ 1.8<br>Multilobar pneumonia, <i>n</i> (%) 8 (7.3) 9 (7.9)<br>Risk class, <i>n</i> (%)    55 (50.0) 63 (55.3) III 55 (50.0) 51 (44.7)<br>Mean PSI score $\pm$ SD 70.0 $\pm$ 11.6 66.9 $\pm$ 12.5 | <b>Outline of intervention</b><br>Outpatients were given oral levofloxacin (500 mg/d), and received detailed written information about their pneumonia diagnosis and their treatment plan, as well as emergency contact telephone numbers for a nurse or investigator physician. Patients were visited at home by a nurse 48 hours after emergency department discharge. The visit included assessment of vital signs and measurement of oxygen saturation by pulse oximetry. If the nurse thought that a patient's condition was not improving (worsening of baseline vital signs, oxygen saturation, or both), one of the investigators made an additional visit. The nurse was involved only in outcome assessment. Patients were seen at the outpatient clinic at days 7 and 30 after pneumonia diagnosis. | <b>Outline of control</b><br>Hospitalized patients received sequential intravenous and oral levofloxacin (500 mg/d) and received detailed written information about their pneumonia diagnosis and their treatment plan, as well as emergency contact telephone numbers for a nurse or investigator physician g/d) Patients assigned to hospitalization were seen daily during their hospital stay by attending physicians and by at least 1 of the investigators. Criteria for early switching from intravenous to oral levofloxacin were a respiratory rate of 24 breaths/min or less, a pulse rate of 100 beats/min or less, a temp of 37.8 °C or lower on 2 occasions at least 8 hours apart, and maintenance of adequate oral intake. Physicians were advised to discharge patients after their clinical condition stabilized, in accordance with previously recommended criteria. Patients were seen at the outpatient clinic at days 7 and 30 after pneumonia diagnosis. | <b>Relevant measures &amp; outcomes</b><br><br><b>Primary outcomes</b><br>% of patients with an overall successful outcome at the end of treatment, according to 7 predefined criteria: cure of pneumonia (as defined later), absence of adverse drug reactions, absence of medical complications during treatment, no need for additional visits, no changes in initial treatment with levofloxacin, <b>absence of subsequent hospital admission in the 30 days after randomization</b> , and absence of death from any cause in the 30 days after randomization.<br><br><b>Secondary outcomes</b><br>Patients' quality of life & satisfaction | Intervention vs. control<br><br><b>Primary outcome</b><br>Successful outcome was achieved in 83.6 vs. 80.7% (absolute difference, 2.9 % points [95% CI, $\pm 7.1$ to 12.9 % points]).<br>% patients with adverse drug reactions (9.1% vs. 9.6%),<br>Subsequent hospital admissions (6.3% vs. 7.0%),<br>Overall mortality (0.9% vs. 0%)<br>Medical complications (0.9% vs. 2.6%),<br><br><b>Secondary outcomes</b><br>All ns<br>Quality of life (9.1% vs. 9.6%)<br>Satisfied with overall care (91.2% vs. 79.1%; absolute difference, 12.1% [CI, 1.8 to 22.5 % points]). |

| Author | Year | Country | Study  | Participants                                                                                                                                                                                                                                                                                                                                                                                                                                                                                                                                                                                                                                                                                                                                                                                                                                                                                                                                                                                                                                                                          | Intervention                                                                                                                                                                                                                                                                                                                                                                                                                                                                                                                                                                                                                                                                                                                                                                                                                                                                                                                                                                                                                                                                                                                                                                                                                                                                                                                                                                                                                                                                                                                                                                       | Control                                                                                                                                                                                                                                                                                                                                                                                                                                                                                                                                                                                                                                                                                                                                          | Outcomes assessed                                                                                                                                                                                                                                                                                                                                      | Results                                                                                                                                                                                                                                                                                                                                                                                                                                                                                                                                                                                                                                                                                                                                                                                                                                                                                                                                                                                                                                                                                                                                                          |
|--------|------|---------|--------|---------------------------------------------------------------------------------------------------------------------------------------------------------------------------------------------------------------------------------------------------------------------------------------------------------------------------------------------------------------------------------------------------------------------------------------------------------------------------------------------------------------------------------------------------------------------------------------------------------------------------------------------------------------------------------------------------------------------------------------------------------------------------------------------------------------------------------------------------------------------------------------------------------------------------------------------------------------------------------------------------------------------------------------------------------------------------------------|------------------------------------------------------------------------------------------------------------------------------------------------------------------------------------------------------------------------------------------------------------------------------------------------------------------------------------------------------------------------------------------------------------------------------------------------------------------------------------------------------------------------------------------------------------------------------------------------------------------------------------------------------------------------------------------------------------------------------------------------------------------------------------------------------------------------------------------------------------------------------------------------------------------------------------------------------------------------------------------------------------------------------------------------------------------------------------------------------------------------------------------------------------------------------------------------------------------------------------------------------------------------------------------------------------------------------------------------------------------------------------------------------------------------------------------------------------------------------------------------------------------------------------------------------------------------------------|--------------------------------------------------------------------------------------------------------------------------------------------------------------------------------------------------------------------------------------------------------------------------------------------------------------------------------------------------------------------------------------------------------------------------------------------------------------------------------------------------------------------------------------------------------------------------------------------------------------------------------------------------------------------------------------------------------------------------------------------------|--------------------------------------------------------------------------------------------------------------------------------------------------------------------------------------------------------------------------------------------------------------------------------------------------------------------------------------------------------|------------------------------------------------------------------------------------------------------------------------------------------------------------------------------------------------------------------------------------------------------------------------------------------------------------------------------------------------------------------------------------------------------------------------------------------------------------------------------------------------------------------------------------------------------------------------------------------------------------------------------------------------------------------------------------------------------------------------------------------------------------------------------------------------------------------------------------------------------------------------------------------------------------------------------------------------------------------------------------------------------------------------------------------------------------------------------------------------------------------------------------------------------------------|
| Kalra  | 2005 | UK      | Stroke | <p>Patients were included within 72 hours of stroke onset. The research team was notified by telephone or fax by GPs for patients at home, and by accident and emergency (A&amp;E) services for suspected stroke patients presenting to the casualty department.</p> <p><b>Inclusion criteria:</b><br/>Patients with disabling stroke who could be supported at home with nursing, therapy and social services input on initial assessment were included in the study.</p> <p><b>Exclusion criteria</b><br/>Patients with mild stroke, severe strokes, already admitted to hospitals, and those with unusual or atypical neurological features who required specialised assessments or investigation to establish a diagnosis of stroke. Patients who were institutionalised or had severe disability (Rankin 4 or 5) before stroke</p> <p><b>Baseline characteristics of participants SU vs. ST vs. HC</b><br/>Median age (years) (IQR) 75 (72–84) 77.3 (71–83) 77.7 (67–83)<br/>No. of females (%) 69 (46.6) 76 (50.6) 68 (45.6) Living alone (%) 50 (33.7) 55 (36.6) 50 (33.5)</p> | <p><b>Outline of intervention</b><br/><b>ST</b> Patients were managed on general wards &amp; under care of admitting physicians. All patients were seen by specialist team: doctor (specialist registrar grade), a nurse (grade G), a physiotherapist (senior I) and an occupational therapist (senior I) with expertise in stroke management. Patients were assessed by the specialist team, which undertook a diagnostic evaluation and assessment for needs. Ward provided the day-to-day treatment, the team advised on specialist aspects of stroke care. It reviewed progress and treatment of individual patients with ward team &amp; helped in discharge planning and setting up of post discharge services. The team provided counselling, education and support to the family, identified expectations and advised about realistic outcomes in the context of previous morbidity and present deficits.</p> <p><b>DC</b> Patients were managed in own home by a specialist team consisting of a doctor (specialist registrar), a nurse (G grade) &amp; therapists (senior I grades), with support from district nursing and social services for nursing and personal care needs. Patients were under the joint care of the stroke physician and GP. Investigations, including CT scanning, were performed in outpatient s. Therapy was provided by members of the specialist stroke team. Each patient had an individualised integrated care pathway outlining activities and the objectives of treatment, which was reviewed at weekly multi-disciplinary meetings.</p> | <p><b>Outline of control</b><br/><b>SU</b><br/>Care was provided by a stroke physician supported by a multidisciplinary team with specialist experience in stroke management. There were clear guidelines for acute care, prevention of complications, rehabilitation and secondary prevention, and a culture of joint assessments, goal setting, coordinated treatment and discharge planning.</p> <p>A coordinated multidisciplinary approach was adopted towards rehabilitation, with emphasis on early mobilisation. All patients had an individualised rehabilitation plan with clearly defined goals based on joint assessments. Patient participation was encouraged, with focus on motivation and providing an enriched environment.</p> | <p><b>Relevant measures &amp; outcomes</b></p> <p><b>Primary outcomes</b><br/>Death or institutionalisation at 1 year.</p> <p>Dependence - modified Rankin Scale (mRS),</p> <p><b>Secondary outcomes included</b><br/>Orgogozo scale, BI and FAI for disability, the mRS for handicap</p> <p>EuroQoL-quality of life of patients and their carers.</p> | <p>Mortality and institutionalisation at 1yr were lower on SU vs.ST or DC</p> <p>Significantly fewer patients on SU died compared with ST</p> <p>The proportion of patients alive without severe disability at 1 year was also significantly higher on SU vs. ST or DC.</p> <p>These differences were present at 3 &amp; 6 mths after stroke.</p> <p>Stroke survivors on SU showed greater improvement on basic activities of daily living compared the other two grps. Achievement of higher levels of function was not influenced by strategy of care.</p> <p>QoL at 3mths was significantly better in SU &amp; DC patients.</p> <p>There was greater dissatisfaction with care with ST vs. SU or DC.</p> <p>Poor outcomewith DC and ST was associated with Barthel Index &lt;5, incontinence and with ST, age &gt;75 years.</p> <p>The total costs of stroke per patient over 12mths were £11,450 for SU, £9527 for ST &amp; £6840 for DC<br/>The mean costs per day alive for the SU were significantly less than those for the ST , but no different from DC patients.<br/>Costs for DC were significantly less than for those managed by the SU or ST.</p> |



| Author<br>Year<br>Country                                                                                                                                                                                                                                                     | Study                                                                              | Participants                                                                                                                                                                                                                                                                                                                                                                                                                                                                                                                                                                                                                                                                                                                                                                                                                                                                                                                                                                                                                                                                                                                                                                                                                                                                                                                                          | Intervention                                                                                                                                                                                                                                                                                                                                                                                                                                                                                                                                                                                                                     | Control                                                                                                                                                                       | Outcomes assessed                                                                                    | Results                                                                                                                                                                                                                                                                                                                                                                                                                                                                                                   |
|-------------------------------------------------------------------------------------------------------------------------------------------------------------------------------------------------------------------------------------------------------------------------------|------------------------------------------------------------------------------------|-------------------------------------------------------------------------------------------------------------------------------------------------------------------------------------------------------------------------------------------------------------------------------------------------------------------------------------------------------------------------------------------------------------------------------------------------------------------------------------------------------------------------------------------------------------------------------------------------------------------------------------------------------------------------------------------------------------------------------------------------------------------------------------------------------------------------------------------------------------------------------------------------------------------------------------------------------------------------------------------------------------------------------------------------------------------------------------------------------------------------------------------------------------------------------------------------------------------------------------------------------------------------------------------------------------------------------------------------------|----------------------------------------------------------------------------------------------------------------------------------------------------------------------------------------------------------------------------------------------------------------------------------------------------------------------------------------------------------------------------------------------------------------------------------------------------------------------------------------------------------------------------------------------------------------------------------------------------------------------------------|-------------------------------------------------------------------------------------------------------------------------------------------------------------------------------|------------------------------------------------------------------------------------------------------|-----------------------------------------------------------------------------------------------------------------------------------------------------------------------------------------------------------------------------------------------------------------------------------------------------------------------------------------------------------------------------------------------------------------------------------------------------------------------------------------------------------|
| 1<br>2<br>3<br>4<br>5<br>6<br>7<br>8<br>9<br>10<br>11<br>12<br>13<br>14<br>15<br>16<br>17<br>18<br>19<br>20<br>21<br>22<br>23<br>24<br>25<br>26<br>27<br>28<br>29<br>30<br>31<br>32<br>33<br>34<br>35<br>36<br>37<br>38<br>39<br>40<br>41<br>42<br>43<br>44<br>45<br>46<br>47 | Rodriguez-Cerrillo<br><br>2013<br><br>Spain<br><br>uncomplicated<br>diverticulitis | <p><b>Prospective controlled study</b></p> <p><b>Intervention:</b><br/>Patients stayed 24 h in the Observation Ward within ED prior to discharge and treatment at home. (n=34)</p> <p><b>Control:</b><br/>Traditional hospitalization (n=18)</p> <p><b>Inclusion criteria:</b><br/>≥70 years diagnosed with uncomplicated diverticulitis (The existence of abscess, fistula, bowel obstruction and peritonitis)<br/>Patients who were willing to be treated at home and had a caregiver 24 h a day were transferred to HaH. The rest of the patients were admitted to conventional hospitalization.</p> <p><b>Exclusion criteria</b><br/>Patients with complicated diverticulitis, β-lactam allergy or who required admission to hospital for other pathology</p> <p><b>Baseline characteristics of participants</b><br/>intervention vs. control</p> <p>Age 77 (71–90) 79 (71–98)<br/>Sex (female) 28 (82.4%) 16 (84.2%)<br/>Cardiopathy 9 (26.5%) 6 (31.6%)<br/>Diabetes mellitus 4 (11.7%) 2 (10.5%)<br/>Chronic renal failure 4 (11.7%) 1 (5.2%)<br/>Neoplasm 1 (2.9%) 1 (5.2%)<br/>COPD 1 (2.9%) 1 (5.2%)<br/>Corticosteroids 4 (11.7%) 2 (10.5%)<br/>Previous diverticulitis 7 (20.5%) 3 (15.8%)<br/>Abdominal pain 34 (100%) 19 (100%)<br/>Fever 9 (26.5%) 6 (31.6%)<br/>Diarrhea 6 (17.6%) 3 (15.8%)<br/>Leucocytosis 7 (20.5%) 3 (15.8%)</p> | <p><b>Outline of intervention</b></p> <p><b>Intervention delivered by:</b><br/>All patients were given Ertapenem after diagnosis. Patients in HaH grp stayed 24 h in the observation ward within ED prior to discharge.<br/>At home, nurses administrated Ertapenem every day. The physician conducted 2–3 home visits per week, depending on the patient's clinical course. On admission patients were provided with a phone number to contact the unit if any problem arose. Intravenous antibiotic was changed to oral therapy (amoxicillin–clavulanate) after 4–6 days of treatment until complete 10 days of treatment.</p> | <p><b>Outline of control</b></p> <p><b>Intervention delivered by:</b><br/>All patients were given ertapenem after diagnosis &amp; experienced traditional hospitalisation</p> | <p><b>Relevant measures &amp; outcomes</b></p> <p>No primary nor secondary outcomes were defined</p> | <p>A small amount of free fluid was present in 38% of patients treated with HaH and 42% of patients in hospital. All patients had a good clinical evolution. None of the patients treated with HaH needed be transferred to hospital.<br/>Mean stay was 9 days in HaH vs. 10 days in Hospital.<br/>The cost of each patient with diverticulitis treated at home was 1368 euros cheaper than the cost of a patient treated in the hospital (fewer staff and important reduction of maintenance costs).</p> |



| Author<br>Year<br>Country                                                                                                                                                                                                                                                     | Study                                                                                                                                                                                                                                                                                                                                                                                                                                                                                                                                                                                                                                                                                                                                                                                                                                                                                                                                                                                                                                            | Participants                                                                                                                                                                                                                                                                                                                                                                                                                                                                                                                                                                                                                                                                                                                                                                                                                                                                                                                                                                                                                                                                                                                                                                                                                                                                                                                      | Intervention                                                                                                                                                                                                                                                                                                                                                                                                                                                                                                                                                                                                                                                                                                                                                                                                                                                                                                                                                                                                                                                                                                                                                                                                                                                                                                 | Control                                                                                                                                                                                                                                                                                                                                                                                                                                                                                                                                                                                                                                                                                                                                                                                                                                                                                                         | Outcomes assessed                                                                                                                     | Results                                                                                                                                                                                                                                                                                                                                                                                                                                                                                                                                                                                                                                                                                                                                                                                                                                                                                                                                                                                                                                                                                                                                                                                                            |                                                                                                                                                                                                                                                                                                                                                                                                                                                                                                                                                                                                                                                                                                                                                                                                                                                                                 |
|-------------------------------------------------------------------------------------------------------------------------------------------------------------------------------------------------------------------------------------------------------------------------------|--------------------------------------------------------------------------------------------------------------------------------------------------------------------------------------------------------------------------------------------------------------------------------------------------------------------------------------------------------------------------------------------------------------------------------------------------------------------------------------------------------------------------------------------------------------------------------------------------------------------------------------------------------------------------------------------------------------------------------------------------------------------------------------------------------------------------------------------------------------------------------------------------------------------------------------------------------------------------------------------------------------------------------------------------|-----------------------------------------------------------------------------------------------------------------------------------------------------------------------------------------------------------------------------------------------------------------------------------------------------------------------------------------------------------------------------------------------------------------------------------------------------------------------------------------------------------------------------------------------------------------------------------------------------------------------------------------------------------------------------------------------------------------------------------------------------------------------------------------------------------------------------------------------------------------------------------------------------------------------------------------------------------------------------------------------------------------------------------------------------------------------------------------------------------------------------------------------------------------------------------------------------------------------------------------------------------------------------------------------------------------------------------|--------------------------------------------------------------------------------------------------------------------------------------------------------------------------------------------------------------------------------------------------------------------------------------------------------------------------------------------------------------------------------------------------------------------------------------------------------------------------------------------------------------------------------------------------------------------------------------------------------------------------------------------------------------------------------------------------------------------------------------------------------------------------------------------------------------------------------------------------------------------------------------------------------------------------------------------------------------------------------------------------------------------------------------------------------------------------------------------------------------------------------------------------------------------------------------------------------------------------------------------------------------------------------------------------------------|-----------------------------------------------------------------------------------------------------------------------------------------------------------------------------------------------------------------------------------------------------------------------------------------------------------------------------------------------------------------------------------------------------------------------------------------------------------------------------------------------------------------------------------------------------------------------------------------------------------------------------------------------------------------------------------------------------------------------------------------------------------------------------------------------------------------------------------------------------------------------------------------------------------------|---------------------------------------------------------------------------------------------------------------------------------------|--------------------------------------------------------------------------------------------------------------------------------------------------------------------------------------------------------------------------------------------------------------------------------------------------------------------------------------------------------------------------------------------------------------------------------------------------------------------------------------------------------------------------------------------------------------------------------------------------------------------------------------------------------------------------------------------------------------------------------------------------------------------------------------------------------------------------------------------------------------------------------------------------------------------------------------------------------------------------------------------------------------------------------------------------------------------------------------------------------------------------------------------------------------------------------------------------------------------|---------------------------------------------------------------------------------------------------------------------------------------------------------------------------------------------------------------------------------------------------------------------------------------------------------------------------------------------------------------------------------------------------------------------------------------------------------------------------------------------------------------------------------------------------------------------------------------------------------------------------------------------------------------------------------------------------------------------------------------------------------------------------------------------------------------------------------------------------------------------------------|
| 1<br>2<br>3<br>4<br>5<br>6<br>7<br>8<br>9<br>10<br>11<br>12<br>13<br>14<br>15<br>16<br>17<br>18<br>19<br>20<br>21<br>22<br>23<br>24<br>25<br>26<br>27<br>28<br>29<br>30<br>31<br>32<br>33<br>34<br>35<br>36<br>37<br>38<br>39<br>40<br>41<br>42<br>43<br>44<br>45<br>46<br>47 | <p>Leff<br/>[3066]<br/><br/>2005<br/><br/>USA<br/><br/>Plus<br/>Leff 2009<br/>[2545]<br/>Frick 2009<br/>[0158]</p> <p>Prospective quasi<br/>experimental</p> <p>2 consecutive 11 month<br/>phases</p> <p><b>Intervention:</b><br/>Treatment in a hospital-at-home model of care that substitutes for treatment in an acute care hospital. Offered In the 2<sup>nd</sup> phase of study n=169</p> <p><b>Control:</b><br/>Described as 'observation group' in the first phase of study. Eligible patients were identified and followed through usual hospital care. n=286</p> <p><b>Aim:</b><br/>'to evaluate the safety, efficacy, clinical and functional outcomes, patient and caregiver satisfaction, and costs of providing acute hospital level care in a hospital at home that substituted entirely for admission to an acute care hospital for older persons.'</p> <p><b>Setting:</b><br/><b>Intervention</b> (if received):<br/>At home<br/><b>Control</b><br/><b>Secondary hospital care</b></p> <p><b>Power calculation:</b><br/>No</p> | <p><b>Inclusion criteria:</b><br/>Community-dwelling persons ≥65 yrs old, Lived in catchment area<br/>In the opinion of a physician not involved in study, required admission to an acute care hospital for these illnesses: community-acquired pneumonia, exacerbation of chronic heart failure or chronic obstructive pulmonary disease, or cellulitis.<br/>Required to meet validated criteria of medical eligibility for hospital-at-home care.</p> <p><b>Exclusion criteria</b><br/>Most common reasons for medical ineligibility were uncorrectable hypoxemia, suspected myocardial ischemia, and presence of an acute illness, other than the target illness, for which the patient was required to be hospitalized.</p> <p><b>Baseline characteristics of participants at all sites (Stats shown if signif)</b><br/>Observation vs. intervention Age (SD) 77.3 (6.6) vs.77.2(7.0)<br/>% female 34 vs. 42%<br/>% white 90 vs.86%<br/><b>% in poverty 11 vs.19% p=0.027</b><br/><b>% live alone 43 vs.33% p=0.022</b><br/>Mean mini mental state (SD)25.5 (4.2) vs. 25.2(4.4)<br/>Mean Charlson score (SD) 3.1 (2.0) vs.3.0 (1.8)<br/><b>Mean medications (SD) 6.8 (3.9) vs. 8.1(4.5) p=0.002</b><br/>%Primary admission diagnosis<br/>Pneumonia 31vs. 32%<br/>COPD 32 vs.28%<br/>Cellulitis 12 vs 18%<br/>CHF 25vs.22%</p> | <p>The study was conducted in 3 Medicare managed care (Medicare +Choice) plans at 2 sites and at a Veterans Administration medical centre. Univera Health and Independent Health, in Buffalo, New York, are Medicare + Choice plans These 2 plans collaborated to provide hospital- at-home care and made up 1 study site (site 1).</p> <p>The Fallon Health Care System (site 2), in Worcester, Massachusetts, operates a not-for-profit Medicare +Choice plan, and the Fallon Clinic, a for-profit multispecialty physician group, provides care on a capitated basis to Medicare + Choice beneficiaries.</p> <p>The Portland, Oregon, Veterans Administration Medical Center (site 3) is a quaternary care and teaching facility.</p> <p>A patient requiring admission to the acute care hospital for a target illness was identified in an ED or ambulatory site and his or her eligibility status was determined. Non-study medical personnel, usually ED physicians, made the decision to hospitalize the patient. All patients who were offered but who declined hospital-at-home care were admitted to the acute care hospital. Study coordinators verified the patient's eligibility for HaH using a standard protocol at enrolment. Most patients were identified the morning after admission.</p> | <p><b>Outline of intervention &amp;who delivered</b> 1 Nov 2001-30 Sep 2002<br/>Patients evaluated by HaH physician either in ED or after ambulance transfer to home. HaH nurse met ambulance at patient's home and provided direct one-on-one nursing for an initial period of ≤ 8hrs at site 3 and ≤24 hrs at sites 1 &amp; 2. followed by intermittent nursing visits and HaH physician at least daily. HaH physician was available 24 hours a day for visits. Nursing and other care components, e.g. durable medical equipment, oxygen therapy were provided and some services e.g. home radiology, support provided by independent contractors. Lifeline devices were provided for patients living alone. Diagnostic tests , IV fluids, IV antimicrobial agents, etc. and oxygen/respiratory therapies were provided at home. Patient was followed by same physician until discharged to primary care</p> | <p><b>Outline of control</b><br/>1 Nov 1990-30 Sep 2001) Eligible patients identified &amp; followed through usual hospital care.</p> | <p><b>Relevant measures &amp; outcomes</b></p> <p><b>No distinction between primary and secondary outcomes</b><br/>Intervention group comprised all patients eligible for hospital-at-home care, irrespective of where they were treated. [thus some outcomes are NOT useful to us but some measures are HaH specific]</p> <p><b>Mean LoS (SD) days [Leff 2005]</b></p> <p><b>Mean time in ED (SD) in hrs</b><br/>.....</p> <p>Sub-analysis of HaH vs. Non-HaH (i.e. different to main report [Leff 2009])<br/><b>Changes in ADL and IADL from 1mth before admission -2 weeks after intervention</b></p> <p><b>Costs</b><br/><b>Within each health system and per condition</b> [Frick 2009]</p> <p><b>Overall summary</b><br/>'The HaH care model is feasible, safe, and efficacious for certain older patients with selected acute medical illnesses who require acute hospital-level care.' Leff 2005<br/>HaH care is associated with modestly better improvements in IADL status and trends toward more improvement in ADL status than traditional acute hospital care. Leff 2009<br/>Total costs seem to be lower when substitutive HaH care is available for patients with CHF or COPD disease.Frick2009</p> | <p>Intervention vs. control</p> <p><b>Mean LoS (SD) days</b><br/>4.9 (9.9) 3.2 (2.5) p =0.004</p> <p><b>Mean time in ED (SD) in hrs</b><br/>6.4(1.8,11.6)SD 1.9 vs. 5.5(1.0,21.3) SD3.2<br/><b>P=0.001</b><br/>[Leff 2005]</p> <p>-----<br/><b>Changes in ADL and IADL from 1mth before admission -2 weeks after intervention</b><br/>ADL 0.39(3.13) vs. -0.6(3.09)<br/>p=0.1<br/><b>IADL 0.74(2.86) vs. -0.70(2.68) p=0.007</b><br/>[Leff 2009]</p> <p><b>Costs</b><br/><b>Within each health system and per condition Mean (SD)</b><br/>Overall<br/><b>\$5081(4427)vs.\$7480(8113) p&lt;0.001</b><br/>Pneumonia<br/>\$5272(6036) vs. \$6761(6451)<br/>NS<br/>Congestive heart failure<br/><b>\$3310(2118) vs. \$6399(6643) p≤0.001</b><br/>COPD<br/><b>\$4293(3806) vs. \$6500(7305) p≤0.05</b><br/>Cellulitis<br/>\$4262(2309) vs. \$7287(11471)<br/>NS<br/>[Frick 2009]</p> |

| Author<br>Year<br>Country   | Study                                                                                                                                                                               | Participants                                                                                                                                                                                                                                                                                                                                                                                                                                                                                                                                                                                                                                                                                                                                                                                                                                                                                                                                                                                                          | Intervention                                                                                                                                                                                                                                                                                                                                                                                                                                                                                                                                                                                                                                                                                                                                                                                                                                                                                                                                                                                                                                                                     | Control                                                                                                                                                                                                                                                                                                                                                                                                                                                                                                                                                                | Outcomes assessed                                                                                                                                                                                                                                                                                                                                                                         | Results                                                                                                                                                                                                                                                                                                                                                                                                                                                                                                                                    |
|-----------------------------|-------------------------------------------------------------------------------------------------------------------------------------------------------------------------------------|-----------------------------------------------------------------------------------------------------------------------------------------------------------------------------------------------------------------------------------------------------------------------------------------------------------------------------------------------------------------------------------------------------------------------------------------------------------------------------------------------------------------------------------------------------------------------------------------------------------------------------------------------------------------------------------------------------------------------------------------------------------------------------------------------------------------------------------------------------------------------------------------------------------------------------------------------------------------------------------------------------------------------|----------------------------------------------------------------------------------------------------------------------------------------------------------------------------------------------------------------------------------------------------------------------------------------------------------------------------------------------------------------------------------------------------------------------------------------------------------------------------------------------------------------------------------------------------------------------------------------------------------------------------------------------------------------------------------------------------------------------------------------------------------------------------------------------------------------------------------------------------------------------------------------------------------------------------------------------------------------------------------------------------------------------------------------------------------------------------------|------------------------------------------------------------------------------------------------------------------------------------------------------------------------------------------------------------------------------------------------------------------------------------------------------------------------------------------------------------------------------------------------------------------------------------------------------------------------------------------------------------------------------------------------------------------------|-------------------------------------------------------------------------------------------------------------------------------------------------------------------------------------------------------------------------------------------------------------------------------------------------------------------------------------------------------------------------------------------|--------------------------------------------------------------------------------------------------------------------------------------------------------------------------------------------------------------------------------------------------------------------------------------------------------------------------------------------------------------------------------------------------------------------------------------------------------------------------------------------------------------------------------------------|
| Crilly<br>2010<br>Australia | 'quasi experimental'<br><br>[Controlled (his) study]<br><br><b>Intervention:</b><br>Hospital in the nursing home (HINH) n=62<br><br><b>Control:</b><br>Usual in-hospital care n=115 | <b>Inclusion criteria:</b><br>Reside in an ACF.<br>Have a signed GP request for HINH review from the ACF.<br>Be of any age (usually ≥ 65 yrs).<br>Present with an illness that required hospital services but not necessarily admission e.g. UTI & could have treatment e.g. antibiotics continued by ACF staff.<br>Prior to start of HINH, patients who would have fit inclusion criteria for hospital admission<br><b>Exclusion criteria:</b><br>ACF residents who required extensive treatment that could not be managed in ACF or who required specific services that could only be received in hospital e.g. surgery<br><br><b>Baseline characteristics of participants</b><br><b>HINH vs. Control</b><br>Age (SD) 85(7.1) vs.84.6(6.6)years<br>Triage category<br>3.2 (0.7) vs.3.2(0.7)<br>Female 76vs. 75%<br>Diagnostic category: Respiratory 24 vs.26%<br>Cellulitis 18 vs.17%<br>Kidney/urinary tract 18vs.16%<br>Cardiac 10 vs. 10 %<br>Abdominal/GI 8vs.8%<br>Viral/sepsis 7 vs.6%<br>All other 16 vs.17% | In the ED. Enrolments were made by HINH programme manager (registered nurse) with programme director ( ED director), GPs and ACF nursing staff, as appropriate. After hours and on weekends, if patient was suitable for HINH , they stayed in ED short stay unit and were reviewed by HINH nurse on next weekday.<br><br><b>Outline of intervention</b><br>The HINH nurse checks with the ACF registered nurse and patient on the patients' progress initially on a daily basis and then every couple of days. Discharge occurs when required treatment has ceased. This completes the patients' hospital-affiliated episode.<br><br><b>Intervention delivered by:</b><br>HINH programme delivers acute care nursing support services, medication and equipment to the ACF registered nurse and/or enrolled nurse. These services may include<br>initial training and education regarding antibiotic or IV fluid administration; specific wound treatment and dressing procedure (with dressing materials); suprapubic catheter care, behaviour management and palliative care. | <b>Outline of control</b><br>The comparison group was selected from patients who presented to ED and were subsequently admitted during the same time period. To be included in this group, the patients had to reside in an ACF and be aged ≥65yrs. ACF residents who presented to the ED were in some cases not enrolled in HINH because they had a medical problem that was judged as possibly requiring in-hospital admission services beyond those offered by the HINH.<br><br><b>Intervention delivered by:</b><br>No details but presumably usual hospital staff | <b>Relevant measures &amp; outcomes</b><br><br><b>Hospital LOS (days)</b><br><br><b>ED LOS (hours)</b><br><br><b>Episode of care (total time) LOS (days)</b><br><br><b>Long (≥6days) vs. short hospital LOS</b><br><br><b>Long (≥8 days) ED LOS vs. short</b><br><br><b>Long episode of care (≥6 days)</b><br><br><b>Hospital readmissions within 28 days</b><br><br><b>Costs</b><br>None | HINH vs. Control<br><br>Mean (SD)<br><b>Hospital LOS</b><br><b>2.19 (0.82) vs.6.2(0.59) days</b><br><b>p&lt;0.001</b><br><br><b>ED LOS</b><br><b>9.94(0.66) vs. 7.01(0.47) hrs</b><br><b>p=0.005</b><br><br><b>Episode of Care LOS</b><br>9.56(1.26)vs. 6.20(0.59) days<br>p=0.14<br><br>Percentages<br><b>Hospital LOS 6+days</b><br><b>9.6 vs. 40 p&lt;0.001</b><br>Episode of care 6+days<br>46.8 vs.40.0 p=0.35<br><b>LOS in ED 8+ hours</b><br><b>50.0vs.33.9 p=0.05</b><br><br><b>Readmission in 28 days</b><br>11.3 vs. 11.3 p=0.99 |

| Author<br>Year<br>Country                                                                                                                                                                                                                                                     | Study                            | Participants                                                                                                                                                                           | Intervention                                                                                                                                                                                                                                                                                                                                                                                                                                                                                                                                                                                                                                                                                                                                                                                                                                                                                                                                                      | Control                                                                                                                                                                                                                                                                                                                                                                                                                                                                                                                                                                                                                                                                                                                                                                                                                                                                                                                                                                                                                                                                                                                                                                                                                                                                                                                                                                                                                                                                                                                                                       | Outcomes assessed                                                                                                                                                                                                                                                                                                                                                                        | Results                                                                                                                                                                                                                                                                                                                                                  |                                                                                                                                                                                                                                                                                                                                                                                                                                                                                                                  |
|-------------------------------------------------------------------------------------------------------------------------------------------------------------------------------------------------------------------------------------------------------------------------------|----------------------------------|----------------------------------------------------------------------------------------------------------------------------------------------------------------------------------------|-------------------------------------------------------------------------------------------------------------------------------------------------------------------------------------------------------------------------------------------------------------------------------------------------------------------------------------------------------------------------------------------------------------------------------------------------------------------------------------------------------------------------------------------------------------------------------------------------------------------------------------------------------------------------------------------------------------------------------------------------------------------------------------------------------------------------------------------------------------------------------------------------------------------------------------------------------------------|---------------------------------------------------------------------------------------------------------------------------------------------------------------------------------------------------------------------------------------------------------------------------------------------------------------------------------------------------------------------------------------------------------------------------------------------------------------------------------------------------------------------------------------------------------------------------------------------------------------------------------------------------------------------------------------------------------------------------------------------------------------------------------------------------------------------------------------------------------------------------------------------------------------------------------------------------------------------------------------------------------------------------------------------------------------------------------------------------------------------------------------------------------------------------------------------------------------------------------------------------------------------------------------------------------------------------------------------------------------------------------------------------------------------------------------------------------------------------------------------------------------------------------------------------------------|------------------------------------------------------------------------------------------------------------------------------------------------------------------------------------------------------------------------------------------------------------------------------------------------------------------------------------------------------------------------------------------|----------------------------------------------------------------------------------------------------------------------------------------------------------------------------------------------------------------------------------------------------------------------------------------------------------------------------------------------------------|------------------------------------------------------------------------------------------------------------------------------------------------------------------------------------------------------------------------------------------------------------------------------------------------------------------------------------------------------------------------------------------------------------------------------------------------------------------------------------------------------------------|
| 1<br>2<br>3<br>4<br>5<br>6<br>7<br>8<br>9<br>10<br>11<br>12<br>13<br>14<br>15<br>16<br>17<br>18<br>19<br>20<br>21<br>22<br>23<br>24<br>25<br>26<br>27<br>28<br>29<br>30<br>31<br>32<br>33<br>34<br>35<br>36<br>37<br>38<br>39<br>40<br>41<br>42<br>43<br>44<br>45<br>46<br>47 | Lau<br><br>2013<br><br>Australia | <b>Controlled (his) Case series</b><br><br><b>Intervention</b> Treatment in residential care facilities (TRC) grp n=95<br><br><b>Control</b> Hospital-based aged care unit (ACU) n=167 | <b>Inclusion criteria:</b><br>Patient and/or family consent<br>Capacity within HITH to accept the patient<br>Facility able to manage the care needs of the patient in the residential aged care facility (RACF)<br><br><b>Exclusion criteria:</b><br>Lack of consent from patient and/or family.<br>Behavioural disturbances, which may prevent the delivery of care e.g. aggressive behaviour and frequent removal of IV, access device.<br>History of recent falls, which may impact on the delivery of care in the RACF.<br>If there was conflict regarding management, further input and discussion were carried out in ACU.<br><br><b>Baseline characteristics of participants</b><br><br>TRC vs. ACU<br><b>Age</b> 83.5 vs. 82.8yrs<br><b>Female</b> 53 vs. 59%<br><b>Non-English speaking</b> 42 vs. 48%<br><b>High level of nursing home care</b> 72 vs. 76%<br><b>Dementia</b> 77.9 vs. 45.5% p<0.001<br><b>Charlson score</b> 7.1 SD 1.9 vs. 7.2 SD 2.3 | In the ED the acuity of presenting complaint was triaged to maximize service capacity. Overnight referrals were assessed next morning, (those who presented after hours were put in Short Stay Unit adjacent to ED for assessment. TRC generally provided once daily visits for patient.<br><br>The geriatrician & team members would use clinical judgement to determine if a patient was suitable for TRC<br><br><b>Outline of intervention</b><br>Treatment in Residential Care facilities (TRC) delivered by the Residential Care Intervention Program into the Elderly (RECIPE) service between July-Oct 2008.<br><br><b>Appropriate Clinical Diagnosis</b><br>Dehydration, Pneumonia, Urinary Tract Infection, Gastroenteritis, Deep Venous Thrombosis, Terminal care support.<br><br><b>Treatment can therefore include any of the following:</b><br>IV antibiotics & IV fluids<br>Anticoagulation<br>Oxygen therapy (low flow)<br>Appropriate Allied Health intervention<br>Palliative support*<br>Referral to other appropriate support programs<br><br>* [TRC also offered palliative care as appropriate. If patient's condition changed and management could not be continued, transfer into acute hospital was organized. If patients had uncertain prognosis, treatment was given, followed by palliative care if no response despite optimal treatment.]<br><br><b>Intervention delivered by:</b><br>Geriatrician, registrar and nursing staff with access to allied health staff such as physiotherapy, OT, speech pathology and social work. | <b>Outline of control</b><br>Aged care unit (ACU)<br><br>Inpatients treated in ACU in preceding year July-October 2007, before existence of TRC.<br>ACU is a service for inpatients who have been admitted from residential care facilities for the management of general medical conditions.<br><br><b>Intervention delivered by:</b><br>No details but presumably usual hospital staff | <b>Relevant measures &amp; outcomes</b><br><br><b>Palliative care</b><br><br><b>Mortality on discharge</b><br><br><b>6-month mortality</b><br><br><b>Rehospitalisation within 1-month</b><br><br><b>Total hospitalisation at 6 months</b><br><br><b>Length of hospital care/stay</b><br><br>All measured as 'present or not'<br><br><b>Costs</b><br>None | TRC vs. ACU<br><b>Palliative care</b><br><b>34 (35.8%) 13 (7.8%) &lt;0.001</b><br><b>Mortality on discharge</b><br>11 (11.6%) 20 (12.0%)<br>p=0.924<br><b>6-month mortality</b><br>29 (30.5%) 51 (30.5%)<br>p=0.184<br><b>Re-hospitalization within 1 month</b><br>20 (21.1%) 35 (21.0%) p=0.986<br><b>Total re-hospitalization at 6 months</b><br>39 (41.1%) 68 (40.7%) p=0.963<br><b>Length of stay</b><br><b>Mean ( no SD given ) 2vs.11 days</b><br><b>P&lt;0.001</b><br>Equivalent of 270 vs. 1840 bed days |

## PROSPERO International prospective register of systematic reviews

### A systematic review to identify and assess the effectiveness of hospital alternatives for people over the age of 65 who are at risk of potentially avoidable hospital admission

Alyson Huntley, Melanie Chalder, Will Hollingworth, Chris Metcalfe, Ben Davies, Sarah Purdy

#### Citation

Alyson Huntley, Melanie Chalder, Will Hollingworth, Chris Metcalfe, Ben Davies, Sarah Purdy. A systematic review to identify and assess the effectiveness of hospital alternatives for people over the age of 65 who are at risk of potentially avoidable hospital admission. PROSPERO 2015:CRD42015020371 Available from [http://www.crd.york.ac.uk/PROSPERO\\_REBRANDING/display\\_record.asp?ID=CRD42015020371](http://www.crd.york.ac.uk/PROSPERO_REBRANDING/display_record.asp?ID=CRD42015020371)

#### Review question(s)

- 1) What admission alternatives are there for older patients and do they improve patient outcomes e.g. mortality, quality of life?
- 2) What are the defining characteristics of those older patients for whom the decision to admit to hospital may be unclear?

#### Searches

MEDLINE, MEDLINE in process, EMBASE, CINAHL and the Cochrane Central Register of Controlled Trials (CENTRAL) from 2005 to April 24th 2015. The Kings Fund and AHRQ websites were also searched

#### Types of study to be included

Any type of controlled study

#### Condition or domain being studied

Any condition that may result in an avoidable hospital admission in patients over the age of 65.

#### Participants/ population

People over 65 years of age of either sex living in OECD countries who are at risk of an unplanned admission (probably for an ambulatory sensitive condition) - they will therefore not be admitted to hospital at time of recruitment but could be in community or emergency department (being assessed).

#### Intervention(s), exposure(s)

The intervention of interest is admission to hospital, using definitions developed for previous studies (Huntley et al, Family Practice Fam Pract. 2013 Jun;30(3):266-75.). However it is important to point out that admission is likely to be the control group in many relevant studies.

#### Comparator(s)/ control

Alternatives to admission (likely to be described as the intervention) including but not limited to: hospital at home, virtual ward, rapid response nursing, care at home, admission to a care home, usual care.

#### Context

Reducing emergency bed days is one of the biggest challenges currently facing the National Health Service (NHS). There is considerable pressure to reduce hospital admissions amongst older people (D'Souza, BMJ 2013). There has been a 65% increase in hospital admissions for those over 75 years of age in the last decade, and the oldest old, those over 85 years, now account for 11% of emergency admissions and 25% of bed days (NHS England 2013). There are some older people for whom care in the community is safe, perhaps with the provision of additional services and some for whom admission is required in order to deliver diagnostic or treatment techniques that are only available as an inpatient. This review seeks to identify interventions for those patients that do not fall neatly into one of these categories and in doing so will assess the efficacy of the interventions and provide more detail on this patient

1  
2  
3  
4 population.

5  
6 **Outcome(s)**

7 **Primary outcomes**

8 1) Patient outcomes (including mortality, quality of life, length of stay, readmission, adverse effects of intervention)  
9 plus costs if available.

10  
11 2) Patient characteristics for whom their pathway (admission or not) is unclear including risk factors e.g. co-  
12 morbidities (mental & physical), age, gender, social circumstances, disease severity, recent admission/discharge  
13 availability of other services

14  
15 **Secondary outcomes**

16 None

17  
18 **Data extraction, (selection and coding)**

19 Standardised data extraction forms will be developed using existing guidelines (Higgins 2008 Cochrane handbook  
20 chapter 7 section 7.5). Data will be abstracted by one reviewer. A second reviewer will check data abstraction against  
21 the original paper. Data items: details on participants, Interventions, comparisons, outcome measures

22  
23 **Risk of bias (quality) assessment**

24 Cochrane risk of bias tool will be used for randomised controlled trials. CASP criteria will be used for controlled  
25 trials

26  
27 **Strategy for data synthesis**

28 Meta-analysis of data will be performed using Review Manager Version 5.1 if there are at least three trials with  
29 combinable data with a fixed or random effects model depending on the level of between trial heterogeneity estimated  
30 using the I-squared statistic. Sensitivity analysis will be performed as the data dictates.

31  
32 **Analysis of subgroups or subsets**

33 Dependent on data found

34  
35 **Dissemination plans**

36 This review is part of programme development grant.

37  
38 **Contact details for further information**

39 Dr Huntley

40 Centre of Academic Primary Care,

41 School of Social & Community Medicine

42 University of Bristol

43 Canynge Hall

44 BS8 2PS

45 alyson.huntley@bristol.ac.uk

46  
47 **Organisational affiliation of the review**

48 University of Bristol

49 www.bristol.ac.uk/primaryhealthcare/

50  
51 **Review team**

52 Dr Alyson Huntley, University of Bristol

Dr Melanie Chalder, University of Bristol  
Professor Will Hollingworth, University of Bristol  
Dr Chris Metcalfe, University of Bristol  
Dr Ben Davies, University of Bristol  
Professor Sarah Purdy, University of Bristol

#### Collaborators

Dr Ali Heawood, University of Bristol  
Mrs Helen England, BrisDoc  
Professor Jonathan Benger, University of the West of England

#### Details of any existing review of the same topic by the same authors

None

#### Anticipated or actual start date

02 February 2015

#### Anticipated completion date

29 January 2016

#### Funding sources/sponsors

NIHR Programme Development Grant RP-DG-1213-10004

#### Conflicts of interest

None known

#### Language

English

#### Country

England

#### Subject index terms status

Subject indexing assigned by CRD

#### Subject index terms

Hospitalization; Hospitals; Humans

#### Stage of review

Ongoing

#### Date of registration in PROSPERO

14 May 2015

#### Date of publication of this revision

14 May 2015

#### DOI

10.15124/CRD42015020371

#### Stage of review at time of this submission

Preliminary searches  
Piloting of the study selection process  
Formal screening of search results against eligibility criteria

#### Started

No  
No  
Yes

#### Completed

Yes  
Yes  
No

|                                   |    |    |
|-----------------------------------|----|----|
| Data extraction                   | No | No |
| Risk of bias (quality) assessment | No | No |
| Data analysis                     | No | No |

**PROSPERO**

**International prospective register of systematic reviews**

The information in this record has been provided by the named contact for this review. CRD has accepted this information in good faith and registered the review in PROSPERO. CRD bears no responsibility or liability for the content of this registration record, any associated files or external websites.

For peer review only





# PRISMA 2009 Checklist

| Section/topic                      | #  | Checklist item                                                                                                                                                                                                                                                                                              | Reported on page # |
|------------------------------------|----|-------------------------------------------------------------------------------------------------------------------------------------------------------------------------------------------------------------------------------------------------------------------------------------------------------------|--------------------|
| <b>TITLE</b>                       |    |                                                                                                                                                                                                                                                                                                             |                    |
| Title                              | 1  | Identify the report as a systematic review, meta-analysis, or both.                                                                                                                                                                                                                                         | Page 1             |
| <b>ABSTRACT</b>                    |    |                                                                                                                                                                                                                                                                                                             |                    |
| Structured summary                 | 2  | Provide a structured summary including, as applicable: background; objectives; data sources; study eligibility criteria, participants, and interventions; study appraisal and synthesis methods; results; limitations; conclusions and implications of key findings; systematic review registration number. | Pages 2-3          |
| <b>INTRODUCTION</b>                |    |                                                                                                                                                                                                                                                                                                             |                    |
| Rationale                          | 3  | Describe the rationale for the review in the context of what is already known.                                                                                                                                                                                                                              | Page 5             |
| Objectives                         | 4  | Provide an explicit statement of questions being addressed with reference to participants, interventions, comparisons, outcomes, and study design (PICOS).                                                                                                                                                  | Pages 5-6          |
| <b>METHODS</b>                     |    |                                                                                                                                                                                                                                                                                                             |                    |
| Protocol and registration          | 5  | Indicate if a review protocol exists, if and where it can be accessed (e.g., Web address), and, if available, provide registration information including registration number.                                                                                                                               | Page 6             |
| Eligibility criteria               | 6  | Specify study characteristics (e.g., PICOS, length of follow-up) and report characteristics (e.g., years considered, language, publication status) used as criteria for eligibility, giving rationale.                                                                                                      | Page 6             |
| Information sources                | 7  | Describe all information sources (e.g., databases with dates of coverage, contact with study authors to identify additional studies) in the search and date last searched.                                                                                                                                  | Page 6             |
| Search                             | 8  | Present full electronic search strategy for at least one database, including any limits used, such that it could be repeated.                                                                                                                                                                               | Appendix 1         |
| Study selection                    | 9  | State the process for selecting studies (i.e., screening, eligibility, included in systematic review, and, if applicable, included in the meta-analysis).                                                                                                                                                   | Pages 6-7          |
| Data collection process            | 10 | Describe method of data extraction from reports (e.g., piloted forms, independently, in duplicate) and any processes for obtaining and confirming data from investigators.                                                                                                                                  | Page 7             |
| Data items                         | 11 | List and define all variables for which data were sought (e.g., PICOS, funding sources) and any assumptions and simplifications made.                                                                                                                                                                       | Page 7             |
| Risk of bias in individual studies | 12 | Describe methods used for assessing risk of bias of individual studies (including specification of whether this was done at the study or outcome level), and how this information is to be used in any data synthesis.                                                                                      | Page 7             |
| Summary measures                   | 13 | State the principal summary measures (e.g., risk ratio, difference in means).                                                                                                                                                                                                                               | N/A                |
| Synthesis of results               | 14 | Describe the methods of handling data and combining results of studies, if done, including measures of consistency (e.g., $I^2$ ) for each meta-analysis.                                                                                                                                                   | Page 8             |





# PRISMA 2009 Checklist

| Section/topic                 | #  | Checklist item                                                                                                                                                                                           | Reported on page #                     |
|-------------------------------|----|----------------------------------------------------------------------------------------------------------------------------------------------------------------------------------------------------------|----------------------------------------|
| Risk of bias across studies   | 15 | Specify any assessment of risk of bias that may affect the cumulative evidence (e.g., publication bias, selective reporting within studies).                                                             | Page 7                                 |
| Additional analyses           | 16 | Describe methods of additional analyses (e.g., sensitivity or subgroup analyses, meta-regression), if done, indicating which were pre-specified.                                                         | n/a                                    |
| <b>RESULTS</b>                |    |                                                                                                                                                                                                          |                                        |
| Study selection               | 17 | Give numbers of studies screened, assessed for eligibility, and included in the review, with reasons for exclusions at each stage, ideally with a flow diagram.                                          | Page 8 and Figure 1                    |
| Study characteristics         | 18 | For each study, present characteristics for which data were extracted (e.g., study size, PICOS, follow-up period) and provide the citations.                                                             | Pages 8-17                             |
| Risk of bias within studies   | 19 | Present data on risk of bias of each study and, if available, any outcome level assessment (see item 12).                                                                                                | Pages 8-17 and Appendices 2 & 3        |
| Results of individual studies | 20 | For all outcomes considered (benefits or harms), present, for each study: (a) simple summary data for each intervention group (b) effect estimates and confidence intervals, ideally with a forest plot. | Pages 8-17 and Appendix 5              |
| Synthesis of results          | 21 | Present results of each meta-analysis done, including confidence intervals and measures of consistency.                                                                                                  | Pages 8-17 plus narrative presentation |
| Risk of bias across studies   | 22 | Present results of any assessment of risk of bias across studies (see Item 15).                                                                                                                          | Pages 8-17                             |
| Additional analysis           | 23 | Give results of additional analyses, if done (e.g., sensitivity or subgroup analyses, meta-regression [see Item 16]).                                                                                    | n/a                                    |
| <b>DISCUSSION</b>             |    |                                                                                                                                                                                                          |                                        |
| Summary of evidence           | 24 | Summarize the main findings including the strength of evidence for each main outcome; consider their relevance to key groups (e.g., healthcare providers, users, and policy makers).                     | Page 18                                |
| Limitations                   | 25 | Discuss limitations at study and outcome level (e.g., risk of bias), and at review-level (e.g., incomplete retrieval of identified research, reporting bias).                                            | Pages 18-19                            |
| Conclusions                   | 26 | Provide a general interpretation of the results in the context of other evidence, and implications for future research.                                                                                  | Page 19                                |
| <b>FUNDING</b>                |    |                                                                                                                                                                                                          |                                        |
| Funding                       | 27 | Describe sources of funding for the systematic review and other support (e.g., supply of data); role of funders for the systematic review.                                                               | Page 21                                |

From: Moher D, Liberati A, Tetzlaff J, Altman DG, The PRISMA Group (2009). Preferred Reporting Items for Systematic Reviews and Meta-Analyses: The PRISMA Statement. PLoS Med 6(7): e1000097. doi:10.1371/journal.pmed1000097

For peer review only - <http://bmjopen.bmj.com/site/about/guidelines.xhtml>



# PRISMA 2009 Checklist

Page 2 of 2

For peer review only

1  
2  
3  
4  
5  
6  
7  
8  
9  
10  
11  
12  
13  
14  
15  
16  
17  
18  
19  
20  
21  
22  
23  
24  
25  
26  
27  
28  
29  
30  
31  
32  
33  
34  
35  
36  
37  
38  
39  
40  
41  
42  
43  
44  
45  
46  
47  
48  
49
