# Supplementary material for: A systematic review to identify and assess the effectiveness of alternatives for people over the age of 65 who are at risk of potentially avoidable hospital admission
Source: PubMed Central journal article supplement — BMJ Open. 2017 Aug 1;7(7):e016236. doi: 10.1136/bmjopen-2017-016236 (PMC5642761; doi:10.1136/bmjopen-2017-016236), 2017-08-01
Supplement: bmjopen-2017-016236supp001.pdf [file bmjopen-2017-016236supp001.pdf]

## Appendix 1: Parent search strategy run in Medline

Database: Medline In-process - current week, Medline 1950 to present

Search Strategy: Run April 24<sup>th</sup> 2015

- 1 intervention?.ti. or (intervention? adj6 (clinician? or collaborat\$ or community or complex or DESIGN\$ or doctor? or educational or family doctor? or family physician? or family practitioner? or financial or GP or general practice? or hospital? or impact? or improv\$ or individuali?e? or individuali?ing or interdisciplin\$ or multicomponent or multi-component or multidisciplin\$ or multidisciplin\$ or multifacet\$ or multi-facet\$ or multimodal\$ or multi-modal\$ or personali?e? or personali?ing or pharmacies or pharmacist? or pharmacy or physician? or practitioner? or prescrib\$ or prescription? or primary care or professional\$ or provider? or regulatory or regulatory or tailor\$ or target\$ or team\$ or usual care)).ab. (178760)
- 2 (pre-intervention? or preintervention? or "pre intervention?" or post-intervention? or postintervention? or "post intervention?").ti,ab. (11719)
- 3 (hospital\$ or patient?).hw. and (study or studies or care or health\$ or practitioner? or provider? or physician? or nurse? or nursing or doctor?).ti,hw. (747131)
- 4 demonstration project?.ti,ab. (2027)
- 5 (pre-post or "pre test\$" or pretest\$ or posttest\$ or "post test\$" or (pre adj5 post)).ti,ab. (72037)
- 6 (pre-workshop or post-workshop or (before adj3 workshop) or (after adj3 workshop)).ti,ab. (653)
- 7 trial.ti. or ((study adj3 aim?) or "our study").ab. (697929)
- 8 (before adj10 (after or during)).ti,ab. (375455)
- 9 ("quasi-experiment\$" or quasiexperiment\$ or "quasi random\$" or quasirandom\$ or "quasi control\$" or quasicontrol\$ or ((quasi\$ or experimental) adj3 (method\$ or study or trial or design\$))).ti,ab,hw. (107858)
- 10 ("time series" adj2 interrupt\$).ti,ab,hw. (1212)
- 11 (time points adj3 (over or multiple or three or four or five or six or seven or eight or nine or ten or eleven or twelve or month\$ or hour? or day? or "more than")).ab. (10245)
- 12 pilot.ti. (43282)
- 13 Pilot projects/ (86631)
- 14 (clinical trial or controlled clinical trial or multicenter study).pt. (644558)
- 15 (multicentre or multicenter or multi-centre or multi-center).ti. (31588)

- 16 random\$.ti,ab. or controlled.ti. (809402)
- 17 (control adj3 (area or cohort? or compare? or condition or design or group? or intervention? or participant? or study)).ab. not (controlled clinical trial or randomized controlled trial).pt. (440969)
- 18 Aged/ (2394306)
- 19 "Aged, 80 and over"/ (647729)
- 20 older adults.mp. (38411)
- 21 elderly adults.mp. (2417)
- 22 over 65 years.mp. (3421)
- 23 virtual ward.mp. (12)
- 24 intermediate care.mp. (1478)
- 25 Crisis response.mp. (103)
- 26 Crisis resolution.mp. (99)
- 27 reablement.mp. (12)
- 28 re-ablement.mp. (11)
- 29 hospital care at home.mp. (14)
- 30 hospital-at-home.mp. (289)
- 31 home hospital.mp. (150)
- 32 medical day hospital care.mp. (2)
- 33 day hospital.mp. (2435)
- 34 out-patient facility.mp. (13)
- 35 Domiciliary care.mp. (247)
- 36 intermediate services.mp. (7)
- 37 Intermediate Care Facilities/ (639)
- 38 Home Care Services, Hospital-Based/ (1662)
- 39 Home Health Nursing/ (58)
- 40 Home Nursing/ (8049)
- 41 admission avoidance.mp. (56)
- 42 outreach program.mp. (677)
- 43 hospital outreach.mp. (27)
- 44 nursing-led units.mp. (3)
- 45 hospital in home.mp. (8)
- 46 hospital in the home.mp. (123)
- 47 medical home care.mp. (39)

- 48 Crisis intervention service.mp. (31)
- 49 Geriatric emergency management practice model.mp. (1)
- 50 day unit.mp. (169)
- 51 Day Care/ (4670)
- 52 day centre.mp. (170)
- 53 comprehensive elderly care.mp. (2)
- 54 Substitutive care.mp. (1)
- 55 shared care.mp. (916)
- 56 guided care.mp. (69)
- 57 home-based versus hospital-based.mp. (11)
- 58 home hospitalisation.mp. (28)
- 59 rapid response team.mp. (515)
- 60 rapid response nurse.mp. (2)
- 61 Hospitals, Community/ (10479)
- 62 \*Ambulatory Care/ (15963)
- 63 \*Health Services for the Aged/ (12112)
- 64 or/1-17 (3278427)
- 65 or/23-63 (57831)
- 66 or/18-22 (2428347)
- 67 64 and 65 and 66 (11288)
- 68 67 not (child/ or infant/ or adolescent/ or maternal health services/) (9807)
- 69 68 not (case report/ or case study/ or letter/ or editorial/ or expert opinion.mp.)  
[mp=title, abstract, original title, name of substance word, subject heading  
word, keyword heading word, protocol supplementary concept word, rare  
disease supplementary concept word, unique identifier] (9192)
- 70 69 not (Algeria\$ or Egypt\$ or Liby\$ or Morocc\$ or Tunisia\$ or Western  
Sahara\$ or Angola\$ or Benin or Botswana\$ or Burkina Faso or Burundi or  
Cameroon or Cape Verde or Central African Republic or Chad or Comoros or  
Congo or Djibouti or Eritrea or Ethiopia\$ or Gabon or Gambia\$ or Ghana or  
Guinea or Keny\$ or Lesotho or Liberia or Madagasca\$ or Malawi or Mali or  
Mauritania or Mauritius or Mayotte or Mozambiq\$ or Namibia\$ or Niger or  
Nigeria\$ or Reunion or Rwand\$ or Saint Helena or Senegal or Seychelles or  
Sierra Leone or Somalia or South Africa\$ or Sudan or Swaziland or Tanzania  
or Togo or Ugand\$ or Zambia\$ or Zimbabw\$ or China or Chinese or Hong  
Kong or Macao or Mongolia\$ or Taiwan\$ or Belarus or Moldov\$ or Russia\$ or  
Ukraine or Afghanistan or Armenia\$ or Azerbaijan or Bahrain or Cyprus or  
Cypriot or Georgia\$ or Iran\$ or Iraq\$ or Israel\$ or Jordan\$ or Kazakhstan or  
Kuwait or Kyrgyzstan or Leban\$ or Oman or Pakistan\$ or Palestin\$ or Qatar or  
Saudi Arabia or Syria\$ or Tajikistan or Turkmenistan or United Arab Emirates

or Uzbekistan or Yemen or Bangladesh\$ or Bhutan or British Indian Ocean Territory or Brunei Darussalam or Cambodia\$ or India\$ or Indonesia\$ or Lao or People's Democratic Republic or Malaysia\$ or Maldives or Myanmar or Nepal or Philippin\$ or Singapore or Sri Lanka or Thai\$ or Timor Leste or Vietnam or Albania\$ or Andorra or Bosnia\$ or Herzegovina\$ or Bulgaria\$ or Croatia\$ or Estonia or Faroe Islands or Greenland or Liechtenstein or Lithuani\$ or Macedonia or Malta or maltese or Romania or Serbia\$ or Montenegro or Slovenia or Svalbard or Argentina\$ or Belize or Bolivia\$ or Brazil\$ or chile or Chilean or Colombia\$ or Costa Rica\$ or Cuba or Ecuador or El Salvador or French Guiana or Guatemala\$ or Guyana or Haiti or Honduras or Jamaica\$ or Nicaragua\$ or Panama or Paraguay or Peru or Puerto Rico or Suriname or Uruguay or Venezuela or developing countr\$ or south America\$).ti,sh. (8719)

- 71 admission\*.ab. (140603)
- 72 hospital\*.ab. (747796)
- 73 71 or 72 (804011)
- 74 70 and 73 (3851)
- 75 limit 74 to yr="2005 -Current" (1880)
- 76 remove duplicates from 75 (1829)
