# Supplementary material for: A systematic review to identify and assess the effectiveness of alternatives for people over the age of 65 who are at risk of potentially avoidable hospital admission
Source: PubMed Central journal article supplement — BMJ Open. 2017 Aug 1;7(7):e016236. doi: 10.1136/bmjopen-2017-016236 (PMC5642761; doi:10.1136/bmjopen-2017-016236), 2017-08-01
Supplement: bmjopen-2017-016236supp002.pdf [file bmjopen-2017-016236supp002.pdf]

## Appendix 2: EPOC Risk of bias

### *Paramedic (PP) / emergency care practitioner (ECP) interventions*

#### Study: Mason 2007 RCT - older population with mixed conditions

| Bias                                                                        | Authors' judgement | Support for judgement                                                                                                                                                                                                                                                                                                                                                                                                                                                                                                                  |
|-----------------------------------------------------------------------------|--------------------|----------------------------------------------------------------------------------------------------------------------------------------------------------------------------------------------------------------------------------------------------------------------------------------------------------------------------------------------------------------------------------------------------------------------------------------------------------------------------------------------------------------------------------------|
| Was allocation sequence adequately generated?                               | Low risk           | 'We used cluster randomisation to reduce the risk of contamination (practice in the control group being influenced by the presence of the paramedic practitioner in the community) and to allow service level, rather than individual patient level, evaluation of the intervention. Weeks were randomised before the start of the study (to allow for rostering of the paramedic practitioners) to the paramedic practitioner service being active (intervention) or inactive (control), when the standard 999 service was available' |
| Was allocation adequately concealed?                                        | Low risk           | 'Episode of care with some form of centralised randomisation scheme'                                                                                                                                                                                                                                                                                                                                                                                                                                                                   |
| Were baseline outcome measurements similar?                                 | Unclear risk       | No baseline measure of outcomes since they were related to receiving intervention e.g. ED attendance                                                                                                                                                                                                                                                                                                                                                                                                                                   |
| Were baseline characteristics similar?                                      | Low risk           | Baseline characteristics of intervention and control groups were reported and similar                                                                                                                                                                                                                                                                                                                                                                                                                                                  |
| Were incomplete outcome data adequately addressed?                          | Low risk           | Flow of patients through trial was presented and intention-to-treat analysis used                                                                                                                                                                                                                                                                                                                                                                                                                                                      |
| Was knowledge of allocated interventions adequately prevented during study? | Low risk           | Majority of outcomes were objective but there was one about satisfaction with service i.e. subjective                                                                                                                                                                                                                                                                                                                                                                                                                                  |
| Was study adequately protected against contamination?                       | Low risk           | 'We used cluster randomisation to reduce the risk of contamination (practice in the control group being influenced by the presence of the paramedic practitioner in the community) and to allow service level, rather than individual patient level, evaluation of the intervention'.                                                                                                                                                                                                                                                  |
| Was study free from selective outcome reporting?                            | Low risk           | All outcome measures described in methods section were reported in results section                                                                                                                                                                                                                                                                                                                                                                                                                                                     |
| Was study free from other risks of bias?                                    | Low risk           | Nothing obvious                                                                                                                                                                                                                                                                                                                                                                                                                                                                                                                        |

#### Study: Gray 2008 historical controls - older people with falls

| Bias                                                                        | Authors' judgement | Support for judgement                                                                                                                                                                                                                                                                                                                                                                                             |
|-----------------------------------------------------------------------------|--------------------|-------------------------------------------------------------------------------------------------------------------------------------------------------------------------------------------------------------------------------------------------------------------------------------------------------------------------------------------------------------------------------------------------------------------|
| Was allocation sequence adequately generated?                               | High risk          | 'From January to April 2006 inclusive, all the patients seen by the ECP service who had rung 999 with a diagnosis of either breathing difficulties or an elderly patient (.65 years of age) with a fall were reviewed.' 'Comparison data were taken from January to April 2005 inclusive for attendances to the same ED for patients with the same criteria as above seen by non-ECP ambulance service personnel' |
| Was allocation adequately concealed?                                        | High risk          | As above                                                                                                                                                                                                                                                                                                                                                                                                          |
| Were baseline outcome measurements similar?                                 | Unclear risk       | No baseline measure of outcomes since they were related to receiving intervention e.g. ED attendance                                                                                                                                                                                                                                                                                                              |
| Were baseline characteristics similar?                                      | Unclear risk       | No details given other than 'elderly patients >65yrs with a fall'                                                                                                                                                                                                                                                                                                                                                 |
| Were incomplete outcome data adequately addressed?                          | Unclear risk       | No reference to missing data or how it might be handled                                                                                                                                                                                                                                                                                                                                                           |
| Was knowledge of allocated interventions adequately prevented during study? | Low risk           | Outcome measures were all objective                                                                                                                                                                                                                                                                                                                                                                               |
| Was study adequately protected against contamination?                       | Low risk           | Different data collection time-periods were reported for each group                                                                                                                                                                                                                                                                                                                                               |
| Was study free from selective outcome reporting?                            | Low risk           | All outcome measures described in methods section were reported in results section                                                                                                                                                                                                                                                                                                                                |
| Was study free from other risks of bias?                                    | Low risk           | Only used half of the study population                                                                                                                                                                                                                                                                                                                                                                            |

#### Study: Mason 2012 'quasi experimental' - older population with mixed conditions

| Bias                                                                        | Authors' judgement | Support for judgement                                                                                                                                                                                                                                                                                                                                                  |
|-----------------------------------------------------------------------------|--------------------|------------------------------------------------------------------------------------------------------------------------------------------------------------------------------------------------------------------------------------------------------------------------------------------------------------------------------------------------------------------------|
| Was allocation sequence adequately generated?                               | High risk          | 'Potential 'intervention' trust sites were selected on the basis of their heterogeneity of service delivery of ECP care. 'Control' trust sites that did not employ ECPs, but were in close geographical proximity (i.e. within the same or in a neighbouring county) and which offered the same service configurations as the intervention trusts, were then selected' |
| Was allocation adequately concealed?                                        | High risk          | As above                                                                                                                                                                                                                                                                                                                                                               |
| Were baseline outcome measurements similar?                                 | Unclear risk       | No baseline measure of outcomes since they were related to receiving intervention e.g. ED attendance                                                                                                                                                                                                                                                                   |
| Were baseline characteristics similar?                                      | High risk          | For the care home subgroup, figures were given on selected baseline characteristics but no formal comparison appeared to be made. On face value, clinical characteristics were not balanced e.g. adult medical 30 vs.41%, adult trauma 46 vs.13%                                                                                                                       |
| Were incomplete outcome data adequately addressed?                          | Unclear risk       | No reference to missing data or how it might be handled                                                                                                                                                                                                                                                                                                                |
| Was knowledge of allocated interventions adequately prevented during study? | Low risk           | Outcome measures were all objective                                                                                                                                                                                                                                                                                                                                    |
| Was study adequately protected against contamination?                       | Low risk           | Intervention and control were delivered in different locations                                                                                                                                                                                                                                                                                                         |
| Was study free from selective outcome reporting?                            | Low risk           | All outcome measures described in methods section were reported in results section                                                                                                                                                                                                                                                                                     |
| Was study free from other risks of bias?                                    | Low risk           | Nothing obvious                                                                                                                                                                                                                                                                                                                                                        |

## Emergency Department (ED) interventions

### Study: Sun 2014 RCT - syncope

| Bias                                                                        | Authors' judgement | Support for judgement                                                                                                                                                                                                                         |
|-----------------------------------------------------------------------------|--------------------|-----------------------------------------------------------------------------------------------------------------------------------------------------------------------------------------------------------------------------------------------|
| Was allocation sequence adequately generated?                               | Low risk           | 'Patients were block randomized (n=4) by site in a 1:1 ratio to either the observation protocol or routine inpatient admission'                                                                                                               |
| Was allocation adequately concealed?                                        | Low risk           | 'A computer generated the study arm assignment at randomization, and no research personnel had advance knowledge of study arm assignment. We could not blind this health service intervention to patients, providers, or research personnel.' |
| Were baseline outcome measurements similar?                                 | Unclear risk       | No baseline measure of outcomes since they were related to receiving intervention e.g. inpatient admission rates                                                                                                                              |
| Were baseline characteristics similar?                                      | Low risk           | Baseline characteristics of intervention and control groups were reported and similar                                                                                                                                                         |
| Were incomplete outcome data adequately addressed?                          | Low risk           | Flow chart of participants provided and intention-to-treat analysis performed                                                                                                                                                                 |
| Was knowledge of allocated interventions adequately prevented during study? | Low risk           | Outcome measures were objective but one secondary outcome - participant satisfaction - was subjective                                                                                                                                         |
| Was study adequately protected against contamination?                       | Unclear risk       | Treatment and control were allocated and delivered in same location so possible for participants to swap allocation                                                                                                                           |
| Was study free from selective outcome reporting?                            | Low risk           | All outcome measures described in methods section were reported in results section                                                                                                                                                            |
| Was study free from other risks of bias?                                    | Low risk           | Nothing obvious                                                                                                                                                                                                                               |

### Study: Salvi 2008 CT - older population with mixed conditions

| Bias                                                                        | Authors' judgement | Support for judgement                                                                                                                                                                                            |
|-----------------------------------------------------------------------------|--------------------|------------------------------------------------------------------------------------------------------------------------------------------------------------------------------------------------------------------|
| Was allocation sequence adequately generated?                               | High risk          | 'Trained research assistant (VM) screened patients presenting to the ED for Monday to Friday from 9:00 a.m to 6:00 p.m using a standard information sheet explaining the study protocol to patients and proxies' |
| Was allocation adequately concealed?                                        | High risk          | As above                                                                                                                                                                                                         |
| Were baseline outcome measurements similar?                                 | Unclear risk       | No baseline measure of outcomes since they were related to receiving intervention e.g. number of initial admissions                                                                                              |
| Were baseline characteristics similar?                                      | High risk          | Intervention and control groups were unbalanced - age, 78.1(7) vs.82.5(7.2) p<0.001, female 47 vs. 68% p=0.004, married 70 vs. 40% p<0.001, SPMSQ 2.5(3.3) vs. 5.2(4.2) p<0.001, ADL4.3(2) vs. 3.2(2.5) p=0.001  |
| Were incomplete outcome data adequately addressed?                          | Unclear risk       | No reference to missing data or how it might be handled                                                                                                                                                          |
| Was knowledge of allocated interventions adequately prevented during study? | Low risk           | All outcome measures were objective                                                                                                                                                                              |
| Was study adequately protected against contamination?                       | Unclear risk       | Treatment and control were delivered in different locations                                                                                                                                                      |
| Was study free from selective outcome reporting?                            | Low risk           | All outcome measures described in methods section were reported in results section                                                                                                                               |
| Was study free from other risks of bias?                                    | Low risk           | Nothing obvious                                                                                                                                                                                                  |

### Study: Benaiges 2014 CT - hyperglycaemia

| Bias                                                                        | Authors' judgement | Support for judgement                                                                                                                                                                                                          |
|-----------------------------------------------------------------------------|--------------------|--------------------------------------------------------------------------------------------------------------------------------------------------------------------------------------------------------------------------------|
| Was allocation sequence adequately generated?                               | High risk          | 'Patients were assigned to the DH group if they were admitted to hospital within DH opening hours (weekdays from 8:00 a.m to 4:00 p.m); otherwise they were treated in the emergency department and subsequently hospitalized' |
| Was allocation adequately concealed?                                        | High risk          | As above                                                                                                                                                                                                                       |
| Were baseline outcome measurements similar?                                 | Unclear risk       | No baseline measure of outcomes since they were related to receiving intervention e.g. number of ER visits                                                                                                                     |
| Were baseline characteristics similar?                                      | Low risk           | Baseline characteristics of treatment and control groups were reported and similar                                                                                                                                             |
| Were incomplete outcome data adequately addressed?                          | Unclear risk       | No reference to missing data or how it might be handled                                                                                                                                                                        |
| Was knowledge of allocated interventions adequately prevented during study? | Low risk           | All outcome measures were objective                                                                                                                                                                                            |
| Was study adequately protected against contamination?                       | Low risk           | 'Patients were treated with same protocol for both DH and CH' so contamination was possible                                                                                                                                    |
| Was study free from selective outcome reporting?                            | Low risk           | All outcome measures described in methods section were reported in results section                                                                                                                                             |
| Was study free from other risks of bias?                                    | Low risk           | Nothing obvious                                                                                                                                                                                                                |

## Community hospital interventions

### Study: Vicente 2014 RCT

| Bias                                                                        | Authors' judgement | Support for judgement                                                                                                                                                                                                                                                                                                                                                                |
|-----------------------------------------------------------------------------|--------------------|--------------------------------------------------------------------------------------------------------------------------------------------------------------------------------------------------------------------------------------------------------------------------------------------------------------------------------------------------------------------------------------|
| Was allocation sequence adequately generated?                               | Low risk           | 'The dispatchers at the EMCC randomized older adults into the study. A sealed envelope randomization procedure was initiated when the dispatcher received the incoming call and identified the participant as an individual aged 65 who resided in the specified geographical area and was assigned a priority level 2 or 3, and the call occurred between 8:00 a.m. and 10:00 p.m.' |
| Was allocation adequately concealed?                                        | Low risk           | 'The envelope contained the name of the EMS Company 1 or the name of the EMS Company 2. There was an equal chance (1:1) of being assigned to either of the ambulance companies'                                                                                                                                                                                                      |
| Were baseline outcome measurements similar?                                 | Unclear risk       | No baseline measure of outcomes since they were related to receiving intervention e.g. number of individuals sent direct to community hospital                                                                                                                                                                                                                                       |
| Were baseline characteristics similar?                                      | High risk          | There was a difference in the priority level when ambulance sent out (% individuals) – Level 1) 1.6 vs. 0%, Level 2) 59 vs. 47%, Level 3) 39 vs.53%, p=0.001                                                                                                                                                                                                                         |
| Were incomplete outcome data adequately addressed?                          | Unclear risk       | No reference to missing data or how it might be handled                                                                                                                                                                                                                                                                                                                              |
| Was knowledge of allocated interventions adequately prevented during study? | Low risk           | All outcome measures were objective                                                                                                                                                                                                                                                                                                                                                  |
| Was study adequately protected against contamination?                       | Low risk           | Separate sealed envelope opened for each individual case                                                                                                                                                                                                                                                                                                                             |
| Was study free from selective outcome reporting?                            | Low risk           | All outcome measures described in methods section were reported in results section                                                                                                                                                                                                                                                                                                   |
| Was study free from other risks of bias?                                    | Low risk           | Nothing obvious                                                                                                                                                                                                                                                                                                                                                                      |

### Study: Garasen 2007/8 ab RCT - older population with mixed conditions

| Bias                                                                        | Authors' judgement | Support for judgement                                                                                                                                                                                          |
|-----------------------------------------------------------------------------|--------------------|----------------------------------------------------------------------------------------------------------------------------------------------------------------------------------------------------------------|
| Was allocation sequence adequately generated?                               | Low risk           | 'When an eligible patient was identified and accepted for inclusion, a blinded randomisation was performed by the Clinical Research Department using random number tables in blocks to ensure balanced groups' |
| Was allocation adequately concealed?                                        | Low risk           | As above                                                                                                                                                                                                       |
| Were baseline outcome measurements similar?                                 | Unclear risk       | No baseline measure of outcomes since they were related to receiving intervention e.g. number of readmissions for index disease                                                                                |
| Were baseline characteristics similar?                                      | Unclear risk       | Baseline characteristics of intervention and control groups were described but no formal comparison reported                                                                                                   |
| Were incomplete outcome data adequately addressed?                          | Unclear            | No reference to missing data or how it might be handled                                                                                                                                                        |
| Was knowledge of allocated interventions adequately prevented during study? | Low risk           | All outcome measures were objective                                                                                                                                                                            |
| Was study adequately protected against contamination?                       | Low risk           | Participants were allocated using a clear process but 8 individuals originally assigned to CH were later assigned to GH                                                                                        |
| Was study free from selective outcome reporting?                            | Low risk           | All outcomes described in methods section were reported in results section plus 12-month data was used in Garasen 2008                                                                                         |
| Was study free from other risks of bias?                                    | Low risk           | Nothing obvious                                                                                                                                                                                                |

## Hospital-at-Home (HAH) interventions: heart failure

### Study: Patel 2008 pilot RCT - heart failure

| Bias                                                                        | Authors' judgement | Support for judgement                                                                                                                                       |
|-----------------------------------------------------------------------------|--------------------|-------------------------------------------------------------------------------------------------------------------------------------------------------------|
| Was allocation sequence adequately generated?                               | Low risk           | Open pilot RCT                                                                                                                                              |
| Was allocation adequately concealed?                                        | Unclear risk       | Used 'random number generator under direction of specialist nurse or hospital admission staff' but no further detail provided                               |
| Were baseline outcome measurements similar?                                 | Low risk           | Mostly not relevant since majority of outcomes were related to process                                                                                      |
| Were baseline characteristics similar?                                      | Low risk           | Baseline characteristics of intervention and control groups were reported and small differences seen in gender, education and two particular co-morbidities |
| Were incomplete outcome data adequately addressed?                          | High risk          | Flow of patients was described although description of analysis was lacking                                                                                 |
| Was knowledge of allocated interventions adequately prevented during study? | Unclear risk       | No detail provided                                                                                                                                          |
| Was study adequately protected against contamination?                       | Low risk           | Treatment and control were delivered in different locations                                                                                                 |
| Was study free from selective outcome reporting?                            | Unclear risk       | Difficult to understand the description of outcomes in methods section but all were reported in results section                                             |
| Was study free from other risks of bias?                                    | Unclear risk       | Description of analysis and results was possibly too assertive for a feasibility study                                                                      |

### Study: Mendoza 2009/Garcia-Soletto 2013 RCT - heart failure

| Bias                                                                        | Authors' judgement | Support for judgement                                                                                                                                                                              |
|-----------------------------------------------------------------------------|--------------------|----------------------------------------------------------------------------------------------------------------------------------------------------------------------------------------------------|
| Was allocation sequence adequately generated?                               | Low risk           | 'Randomly assigned (1:1) to one of the intervention groups according to an externally generated sequence, which was hidden from the clinicians until the patient had given consent to participate' |
| Was allocation adequately concealed?                                        | Low risk           | As above                                                                                                                                                                                           |
| Were baseline outcome measurements similar?                                 | Low risk           | Mostly not relevant since outcomes were related to process but functional status and health-related QoL were similar                                                                               |
| Were baseline characteristics similar?                                      | Low risk           | Baseline characteristics of intervention and control groups were reported and similar                                                                                                              |
| Were incomplete outcome data adequately addressed?                          | Low risk           | Patient flow through trial was described and 'per protocol' analysis performed                                                                                                                     |
| Was knowledge of allocated interventions adequately prevented during study? | Unclear risk       | No detail provided                                                                                                                                                                                 |
| Was study adequately protected against contamination?                       | Low risk           | Treatment and control were delivered in different locations                                                                                                                                        |
| Was study free from selective outcome reporting?                            | Low risk           | All outcome measures described in methods section were reported in results section                                                                                                                 |
| Was study free from other risks of bias?                                    | Low risk           | Nothing obvious                                                                                                                                                                                    |

### Study: Tibaldi 2009 RCT - heart failure

| Bias                                                                        | Authors' judgement | Support for judgement                                                                                                                                                                                                                                                                                                   |
|-----------------------------------------------------------------------------|--------------------|-------------------------------------------------------------------------------------------------------------------------------------------------------------------------------------------------------------------------------------------------------------------------------------------------------------------------|
| Was allocation sequence adequately generated?                               | Low risk           | 'By the use of a set of computer-generated random numbers in a 1:1 ratio. The allocation sequence was unknown to any of the investigators and was contained in a set of sealed envelopes, each bearing on the outside only the name of the hospital and a number, which was opened after the acceptance of the patient' |
| Was allocation adequately concealed?                                        | Low risk           | Participants were enrolled within 12-24 hours of ED admission by research assistants, masked to both allocation and hypotheses being tested                                                                                                                                                                             |
| Were baseline outcome measurements similar?                                 | Low risk           | Mostly not relevant since outcomes were related to process but depression, function and nutrition measures were similar                                                                                                                                                                                                 |
| Were baseline characteristics similar?                                      | Unclear risk       | Baseline characteristics of intervention and control groups were reported and heart rate was significantly different p=0.006                                                                                                                                                                                            |
| Were incomplete outcome data adequately addressed?                          | Low risk           | Patient flow through trial described and intention-to-treat analysis performed                                                                                                                                                                                                                                          |
| Was knowledge of allocated interventions adequately prevented during study? | Unclear risk       | No detail available                                                                                                                                                                                                                                                                                                     |
| Was study adequately protected against contamination?                       | Low risk           | Treatment and control were delivered in different locations                                                                                                                                                                                                                                                             |
| Was study free from selective outcome reporting?                            | Low risk           | All outcome measures described in methods section were reported in results section                                                                                                                                                                                                                                      |
| Was study free from other risks of bias?                                    | Low risk           | Nothing obvious                                                                                                                                                                                                                                                                                                         |

## Hospital-at-Home (HAH): COPD

### Study: Ricauda 2008 RCT - COPD

| Bias                                                                        | Authors' judgement | Support for judgement                                                                                                                                                                                                                                                                                             |
|-----------------------------------------------------------------------------|--------------------|-------------------------------------------------------------------------------------------------------------------------------------------------------------------------------------------------------------------------------------------------------------------------------------------------------------------|
| Was allocation sequence adequately generated?                               | Low risk           | Patients were randomised using a set of computer-generated random numbers in a 1:1 ratio.                                                                                                                                                                                                                         |
| Was allocation adequately concealed?                                        | Low risk           | Allocation sequence was unknown to any of the investigators and kept in a set of sealed envelopes, each bearing on the outside only the name of the hospital and a number. After acceptance of a patient, the ED nurse coordinator, who was not involved in the study, opened the appropriately numbered envelope |
| Were baseline outcome measurements similar?                                 | Low risk           | Mostly not relevant since outcomes were related to process but clinical outcomes e.g. depression were similar                                                                                                                                                                                                     |
| Were baseline characteristics similar?                                      | Low risk           | Recorded in DE table                                                                                                                                                                                                                                                                                              |
| Were incomplete outcome data adequately addressed?                          | Low risk           | Drop outs/loss-to-follow-up were recorded and intention-to-treat analysis performed                                                                                                                                                                                                                               |
| Was knowledge of allocated interventions adequately prevented during study? | Unclear risk       | Single-blind study since patients were aware of the treatment assignment although physicians and nurses evaluating patients were blinded to the patient's allocation                                                                                                                                              |
| Was study adequately protected against contamination?                       | Low risk           | Treatment and control were delivered in different locations                                                                                                                                                                                                                                                       |
| Was study free from selective outcome reporting?                            | Low risk           | All outcome measures described in methods section were reported in results section                                                                                                                                                                                                                                |
| Was study free from other risks of bias?                                    | Low risk           | Nothing obvious                                                                                                                                                                                                                                                                                                   |

## Hospital-at-Home (HAH): Pulmonary embolism

### Study: Rodriguez-Cerillo 2009 nRCT - non-massive pulmonary embolism

| Bias                                                                        | Authors' judgement | Support for judgement                                                                                                                                                         |
|-----------------------------------------------------------------------------|--------------------|-------------------------------------------------------------------------------------------------------------------------------------------------------------------------------|
| Was allocation sequence adequately generated?                               | High risk          | nRCT                                                                                                                                                                          |
| Was allocation adequately concealed?                                        | High risk          | nRCT                                                                                                                                                                          |
| Were baseline outcome measurements similar?                                 | Low risk           | Mostly not relevant since outcomes were related to process                                                                                                                    |
| Were baseline characteristics similar?                                      | Low risk           | Baseline characteristics of treatment and control groups were reported and only difference was prior thromboembolic disease, with these cases all being allocated to hospital |
| Were incomplete outcome data adequately addressed?                          | High risk          | No patient flow or analysis was described                                                                                                                                     |
| Was knowledge of allocated interventions adequately prevented during study? | High risk          | nRCT                                                                                                                                                                          |
| Was study adequately protected against contamination?                       | Low risk           | Clinical decision-making at study entry and any subsequent changes were recorded – although none made in practice                                                             |
| Was study free from selective outcome reporting?                            | Low risk           | All outcome measures described in methods section were reported in results section                                                                                            |
| Was study free from other risks of bias?                                    | High risk          | Reported some 'external' decision-making                                                                                                                                      |

## Hospital-at-Home (HAH): Pneumonia

### Study: Carratala 2005 open RCT - pneumonia

| Bias                                                                        | Authors' judgement | Support for judgement                                                                                                                                                                                                                                                                                                                                                                                       |
|-----------------------------------------------------------------------------|--------------------|-------------------------------------------------------------------------------------------------------------------------------------------------------------------------------------------------------------------------------------------------------------------------------------------------------------------------------------------------------------------------------------------------------------|
| Was allocation sequence adequately generated?                               | Low risk           | Randomisation was performed by using a computer-generated random code with a block size of 10                                                                                                                                                                                                                                                                                                               |
| Was allocation adequately concealed?                                        | Low risk           | Randomisation was stratified by hospital site, and the random code was held centrally, in a sealed envelope, by the clinical epidemiologist. In the emergency department, the infectious disease consultant (in most cases not a study investigator) opened sealed, sequentially numbered opaque envelopes to randomly assign patients who had provided written informed consent and met the study criteria |
| Were baseline outcome measurements similar?                                 | Low risk           | Mostly not relevant since outcomes were related to process                                                                                                                                                                                                                                                                                                                                                  |
| Were baseline characteristics similar?                                      | Low risk           | Detailed in DE table                                                                                                                                                                                                                                                                                                                                                                                        |
| Were incomplete outcome data adequately addressed?                          | Low risk           | Patient flow through trial was reported and intention-to-treat analysis performed                                                                                                                                                                                                                                                                                                                           |
| Was knowledge of allocated interventions adequately prevented during study? | Unclear risk       | Trial was described as 'unblinded'                                                                                                                                                                                                                                                                                                                                                                          |
| Was study adequately protected against contamination?                       | Low risk           | Treatment and control were delivered in different locations                                                                                                                                                                                                                                                                                                                                                 |
| Was study free from selective outcome reporting?                            | Low risk           | All outcome measures described in methods section were reported in results section                                                                                                                                                                                                                                                                                                                          |
| Was study free from other risks of bias?                                    | Unclear risk       | Lack of blinding in terms of assessment could be problematic                                                                                                                                                                                                                                                                                                                                                |

## Hospital-at-Home (HAH): Stroke

### Study: Kalra 2005 RCT - stroke

| Bias                                                                        | Authors' judgement | Support for judgement                                                                                                                                                                                                                       |
|-----------------------------------------------------------------------------|--------------------|---------------------------------------------------------------------------------------------------------------------------------------------------------------------------------------------------------------------------------------------|
| Was allocation sequence adequately generated?                               | Low risk           | Randomisation was not stratified and was undertaken using the block randomisation technique. This ensured that the number of patients allocated to the stroke unit or to domiciliary services at any one time did not exceed their capacity |
| Was allocation adequately concealed?                                        | Unclear risk       | Randomisation was conducted in blocks of 30 in an office remote from patient treatment areas, so that it would not be possible for those enrolling patients to guess allocation for the vast majority of subjects                           |
| Were baseline outcome measurements similar?                                 | Low risk           | Mostly not relevant since outcomes were related to process                                                                                                                                                                                  |
| Were baseline characteristics similar?                                      | Low risk           | Baseline characteristics with regard to stroke type, severity, level of impairment and initial disability were well-matched across the three groups                                                                                         |
| Were incomplete outcome data adequately addressed?                          | Low risk           | Patient flow through trial was reported and intention-to-treat analysis performed                                                                                                                                                           |
| Was knowledge of allocated interventions adequately prevented during study? | Unclear risk       | No detail provided                                                                                                                                                                                                                          |
| Was study adequately protected against contamination?                       | Unclear risk       | Patients were brought to hospital from domiciliary care if that was considered to be clinically appropriate                                                                                                                                 |
| Was study free from selective outcome reporting?                            | Low risk           | All outcome measures described in methods section were reported in results section                                                                                                                                                          |
| Was study free from other risks of bias?                                    | High risk          | In order to ensure that participants were treated in the most appropriate setting, swapping of groups was possible                                                                                                                          |

## Hospital-at-Home (HAH): Uncomplicated diverticulitis

### Study: Rodriguez-Cerrillo 2013 nRCT - uncomplicated diverticulitis

| Bias                                                                        | Authors' judgement | Support for judgement                                                              |
|-----------------------------------------------------------------------------|--------------------|------------------------------------------------------------------------------------|
| Was allocation sequence adequately generated?                               | High risk          | nRCT                                                                               |
| Was allocation adequately concealed?                                        | High risk          | As above                                                                           |
| Were baseline outcome measurements similar?                                 | Low risk           | Mostly not relevant since outcomes were related to process                         |
| Were baseline characteristics similar?                                      | Low risk           | Very limited details provided about age, gender and presenting complaint           |
| Were incomplete outcome data adequately addressed?                          | High risk          | No flow of patients was given and only basic analysis reported                     |
| Was knowledge of allocated interventions adequately prevented during study? | High risk          | No detail provided                                                                 |
| Was study adequately protected against contamination?                       | Low risk           | Treatment and control were delivered in different locations                        |
| Was study free from selective outcome reporting?                            | Low risk           | All outcome measures described in methods section were reported in results section |
| Was study free from other risks of bias?                                    | Unclear risk       | Both analysis and reporting of results were limited                                |

## Hospital-at-Home (HAH): Mixed population

### Study: Leff 2005/2009 'quasi experimental' - older population with mixed conditions

| Bias                                                                        | Authors' judgement | Support for judgement                                                                                                                                                                                                                                                                                                                                                                                                   |
|-----------------------------------------------------------------------------|--------------------|-------------------------------------------------------------------------------------------------------------------------------------------------------------------------------------------------------------------------------------------------------------------------------------------------------------------------------------------------------------------------------------------------------------------------|
| Was allocation sequence adequately generated?                               | High risk          | 'During the acute care hospital observation phase (1 November 1990 to 30 September 2001), eligible patients were identified and followed through usual hospital care.' During the intervention phase (1 November 2001 to 30 September 2002), eligible patients were identified at the time of admission and were offered the option of receiving their care in hospital-at-home rather than in the acute care hospital' |
| Was allocation adequately concealed?                                        | High risk          | As above                                                                                                                                                                                                                                                                                                                                                                                                                |
| Were baseline outcome measurements similar?                                 | Unclear risk       | No baseline measure of outcomes since they were related to receiving intervention e.g. time before evaluation                                                                                                                                                                                                                                                                                                           |
| Were baseline characteristics similar?                                      | High risk          | Populations differed in measures of poverty, living alone and medication. This was acknowledged but not adjusted for.                                                                                                                                                                                                                                                                                                   |
| Were incomplete outcome data adequately addressed?                          | Low risk           | Intention-to-treat analysis was conducted although there were substantial missing data e.g. in relation to functional status                                                                                                                                                                                                                                                                                            |
| Was knowledge of allocated interventions adequately prevented during study? | Low risk           | All outcomes were objective in Leff 2005 (main publication) but Leff 2009 used self-reported i.e. subjective daily activity of living as an outcome                                                                                                                                                                                                                                                                     |
| Was study adequately protected against contamination?                       | Low risk           | Unlikely that control group received intervention and vice versa. Rather, patients were allocated HaH or admitted and, if HaH was unacceptable they were admitted                                                                                                                                                                                                                                                       |
| Was study free from selective outcome reporting?                            | Low risk           | All outcomes described in methods section were reported in results section. Whilst there is no mention of activities of daily living in Leff 2005, this outcome was reported in Leff 2009                                                                                                                                                                                                                               |
| Was study free from other risks of bias?                                    | Unclear risk       | Possible selection bias related to differences in baseline characteristics e.g. functional status                                                                                                                                                                                                                                                                                                                       |

### Study: Lau 2003 historical controls

| Bias                                                                        | Authors' judgement | Support for judgement                                                                                                                                                                                                                                                                                                                                                  |
|-----------------------------------------------------------------------------|--------------------|------------------------------------------------------------------------------------------------------------------------------------------------------------------------------------------------------------------------------------------------------------------------------------------------------------------------------------------------------------------------|
| Was allocation sequence adequately generated?                               | High risk          | Control trial with historical control group                                                                                                                                                                                                                                                                                                                            |
| Was allocation adequately concealed?                                        | High risk          | As above                                                                                                                                                                                                                                                                                                                                                               |
| Were baseline outcome measurements similar?                                 | Unclear risk       | No baseline measure of outcomes since they were related to receiving intervention e.g. palliative care received                                                                                                                                                                                                                                                        |
| Were baseline characteristics similar?                                      | High risk?         | There was an imbalance in patient characteristics which may have been due to recruitment bias since the provider was responsible for recruiting patients into the trial. There were more dementia patients treated outside of hospital – although presumably their symptoms were 'fairly mild' since more pronounced behavioural problems were excluded from HaH group |
| Were incomplete outcome data adequately addressed?                          | Unclear risk       | No reference to missing data or how it might be handled                                                                                                                                                                                                                                                                                                                |
| Was knowledge of allocated interventions adequately prevented during study? | Low risk           | All outcomes were objective                                                                                                                                                                                                                                                                                                                                            |
| Was study adequately protected against contamination?                       | Low risk           | Unlikely that control group received intervention and vice versa. Rather, patients were allocated HaH or admitted and, if HaH was unacceptable they were admitted                                                                                                                                                                                                      |
| Was study free from selective outcome reporting?                            | Low risk           | All outcome measures described in methods section were reported in results section                                                                                                                                                                                                                                                                                     |
| Was study free from other risks of bias?                                    | Low risk           | Nothing obvious                                                                                                                                                                                                                                                                                                                                                        |

**Study name: Crilly 2010 'quasi experimental' - older population with mixed conditions**

| <b>Bias</b>                                                                 | <b>Authors' judgement</b> | <b>Support for judgement</b>                                                                                                                                                                                                                                                                                                         |
|-----------------------------------------------------------------------------|---------------------------|--------------------------------------------------------------------------------------------------------------------------------------------------------------------------------------------------------------------------------------------------------------------------------------------------------------------------------------|
| Was allocation sequence adequately generated?                               | High risk                 | Intervention group included 62 Aged Care Facility (ACF) residents who were enrolled in the Hospital in Nursing home programme during the first 12 months that the programme was operational, from 1 July 2003–30 June 2004. All sample members were ACF residents who presented to the ED and were subsequently admitted to hospital |
| Was allocation adequately concealed?                                        | High risk                 | As above                                                                                                                                                                                                                                                                                                                             |
| Were baseline outcome measurements similar?                                 | Unclear risk              | No baseline measure of outcomes since they were related to receiving intervention e.g. palliative care received                                                                                                                                                                                                                      |
| Were baseline characteristics similar?                                      | Low risk                  | Baseline characteristics of the study and control are reported and similar                                                                                                                                                                                                                                                           |
| Were incomplete outcome data adequately addressed?                          | Unclear                   | No reference to missing data or how it might be handled                                                                                                                                                                                                                                                                              |
| Was knowledge of allocated interventions adequately prevented during study? | Low risk                  | All outcomes were objective                                                                                                                                                                                                                                                                                                          |
| Was study adequately protected against contamination?                       | Low risk                  | Unlikely that control group received intervention and vice versa. Rather, patients were allocated HaH or admitted and, if HaH was unacceptable they were admitted                                                                                                                                                                    |
| Was study free from selective outcome reporting?                            | Low risk                  | All outcome measures described in methods section were reported in results section                                                                                                                                                                                                                                                   |
| Was study free from other risks of bias?                                    | Low risk                  | Nothing obvious                                                                                                                                                                                                                                                                                                                      |
