# Supplementary material for: A systematic review to identify and assess the effectiveness of alternatives for people over the age of 65 who are at risk of potentially avoidable hospital admission
Source: PubMed Central journal article supplement — BMJ Open. 2017 Aug 1;7(7):e016236. doi: 10.1136/bmjopen-2017-016236 (PMC5642761; doi:10.1136/bmjopen-2017-016236), 2017-08-01
Supplement: bmjopen-2017-016236supp005.pdf [file bmjopen-2017-016236supp005.pdf]

**Summary Table: RCT/nRCT and systematic evidence for alternative to admissions for the older population**

| Intervention/<br>setting                                                                                                                 | Paramedic/<br>emergency care<br>practitioner                                                                                                                                                                                                                                                                                      | Emergency department                                                                                                                                                                                                                                                                                   | Community hospital                                                                                                                                                                                                                                                               | Hospital at home<br>Heart Failure                                                                                                                                                                                                   | Hospital at home<br>COPD                                                                                                                                                                                                                      | Hospital at home<br>Pulmonary embolism                                                                                                                                                         | Hospital at home<br>Pneumonia                                                                                                                                                                                                                                                | Hospital at home<br>Stroke                                                                                                                                                                               | Hospital at home<br>Uncomplicated<br>diverticulitis                                                                     | Hospital at home<br>Older population with acute<br>medical problems                                                                                                                                                                                                                                                                                                                                                        |
|------------------------------------------------------------------------------------------------------------------------------------------|-----------------------------------------------------------------------------------------------------------------------------------------------------------------------------------------------------------------------------------------------------------------------------------------------------------------------------------|--------------------------------------------------------------------------------------------------------------------------------------------------------------------------------------------------------------------------------------------------------------------------------------------------------|----------------------------------------------------------------------------------------------------------------------------------------------------------------------------------------------------------------------------------------------------------------------------------|-------------------------------------------------------------------------------------------------------------------------------------------------------------------------------------------------------------------------------------|-----------------------------------------------------------------------------------------------------------------------------------------------------------------------------------------------------------------------------------------------|------------------------------------------------------------------------------------------------------------------------------------------------------------------------------------------------|------------------------------------------------------------------------------------------------------------------------------------------------------------------------------------------------------------------------------------------------------------------------------|----------------------------------------------------------------------------------------------------------------------------------------------------------------------------------------------------------|-------------------------------------------------------------------------------------------------------------------------|----------------------------------------------------------------------------------------------------------------------------------------------------------------------------------------------------------------------------------------------------------------------------------------------------------------------------------------------------------------------------------------------------------------------------|
| <b>Primary studies identified</b><br><br>19 studies over 24 papers<br>n=10 RCT, n=9 nRCT                                                 | n=3<br>(RCT & 2 nRCT)<br>Mason 2007<br>Gray 2008<br>Mason 2012                                                                                                                                                                                                                                                                    | n=3<br>(RCT & 2 nRCT)<br>Sun 2014<br>Benaiges 2014<br>Salvi 2008                                                                                                                                                                                                                                       | n=2 RCT<br>Vicente 2014<br>Garåsen 2007,<br>2008ab                                                                                                                                                                                                                               | n=3 RCT<br>Mendoza<br>2009/Garcia-<br>Soletto 2013<br>Tibaldi 2009<br>Patel 2008                                                                                                                                                    | n=1 RCT<br>Ricauda 2008                                                                                                                                                                                                                       | n=1 nRCT<br>Rodriguez-Cerillo<br>2009                                                                                                                                                          | n=1 RCT<br>Carratala 2005                                                                                                                                                                                                                                                    | n=1 RCT<br>(3 arm)<br>Kalra 2005                                                                                                                                                                         | n=1 nRCT<br>Rodriguez-Cerrillo 2013                                                                                     | n=3 nRCT<br>Leff 2005/2009/Frick 2009<br>Crilly 2011<br>Lau 2013                                                                                                                                                                                                                                                                                                                                                           |
| <b>Main conclusions of primary studies</b><br><br>Statistically significant differences between alternative care and acute hospital care | Mason RCT<br><b>Reduction:</b><br>Risk of ED attendance,<br>Risk of hospital readmission.<br><b>Increase:</b> Satisfaction with care<br>Mean duration of care<br>Subsequent unplanned contacts with secondary care<br><b>Comparable:</b><br>Mortality<br><br>Two nRCTs report greater reduction in admissions<br><br>No cost data | Sun RCT<br><b>Reduction:</b><br>Time of episode of care<br>Less likely to be admitted into hospital<br>Costs<br><b>Comparable:</b><br>Serious events<br>QoL<br>Satisfaction with care<br>*****<br>Benaiges nRCT<br><b>Reduction:</b><br>Readmissions<br>Costs<br>*****<br>Salvi nRCT<br>no differences | Vicente<br>Data limited. Neither formal analyses nor cost data presented.<br>*****<br>Garåsen<br><b>Reduction:</b><br>Hospital readmissions<br>Receiving any care at 26 wks<br>Deaths<br>Total costs & mean costs per patient<br><b>Increase:</b><br>Observation period<br>***** | Meta-analysis in systematic review                                                                                                                                                                                                  | <b>Reduction:</b><br>Readmissions<br>Mean cost per patient<br><b>Increase:</b><br>Length of stay.<br><b>Comparable:</b><br>Depression<br>QoL<br>Mortality                                                                                     | <b>Comparable:</b><br>Mean length of stay<br>No major bleeding, thrombosis or death in either group<br>No cost data                                                                            | <b>Increase:</b><br>Patients were satisfied with care<br><b>Comparable:</b><br>An overall 'successful outcome'<br>Readmissions<br>QoL<br>Adverse drug reactions<br>Medical complications<br>Mortality<br><br>No cost data                                                    | <b>Increase:</b><br>Mortality & institutionalisation<br><br><b>Reduction:</b> QoL scores basic activities of daily living<br><br>Costs were lower for HaH group but eclipsed by poorer patient outcomes. | Limited data.<br><b>Reduction:</b><br>Cost reduction of €1368 per patient.<br><b>Comparable:</b><br>Mean length of stay | Leff<br><b>Reduction:</b><br>Length of stay<br>Mean treatment cost<br><b>Comparable:</b><br>Use of health services<br>ED visits or readmission<br>*****<br>Crilly<br><b>Increase:</b><br>Longer time in ED<br><b>Comparable:</b><br>Length of episode of total care<br>No mortality or cost data<br>*****<br>Lau<br><b>Reduction:</b><br>Length of stay<br><b>Comparable:</b><br>Mortality<br>Readmissions<br>No cost data |
| <b>Systematic review identified</b>                                                                                                      | NO                                                                                                                                                                                                                                                                                                                                | NO                                                                                                                                                                                                                                                                                                     | NO                                                                                                                                                                                                                                                                               | Quaddoura 2015                                                                                                                                                                                                                      | Jeppesen 2012                                                                                                                                                                                                                                 | Vinson 2012                                                                                                                                                                                    | Chalmers 2011                                                                                                                                                                                                                                                                | Shepperd 2016<br>Chalmers 2011                                                                                                                                                                           | Varney 2014                                                                                                             | NO                                                                                                                                                                                                                                                                                                                                                                                                                         |
| <b>Description of, and main conclusions of systematic review</b>                                                                         |                                                                                                                                                                                                                                                                                                                                   |                                                                                                                                                                                                                                                                                                        |                                                                                                                                                                                                                                                                                  | 3 RCTs as above used in meta-analysis<br><b>Increase:</b><br>Time to first readmission<br>HQoL at 6 & 12 mths<br><b>Reduction:</b><br>Costs for index treatment<br><b>Comparable:</b><br>Rate of readmission<br>All-cause mortality | 8 RCTs 7 did not fit inclusion criteria plus RCT detailed above.<br><b>Review summary:</b><br>Selected COPD patients can be safely & successfully treated at home.<br>Favourable readmission rates.<br>A trend towards reduced mortality rate | 7 observation studies plus one nRCT detailed above.<br><b>Review summary:</b><br>Data are limited, but evidence supports the feasibility & safety of for carefully selected low risk patients. | 5 studies comprising variety of designs plus one RCT detailed above<br><b>Review summary:</b><br>Interventions appear safe.<br>Comparable for mortality, hospital readmissions patient satisfaction.<br>Insufficient data for quality of life or return to usual activities. | Two previous systematic reviews on a mixture of conditions including one RCT described above                                                                                                             | Integrative review on admission-avoidance HaH services and included one nRCT described above                            |                                                                                                                                                                                                                                                                                                                                                                                                                            |
