# Supplementary material for: A systematic review to identify and assess the effectiveness of alternatives for people over the age of 65 who are at risk of potentially avoidable hospital admission
Source: PubMed Central journal article supplement — BMJ Open. 2017 Aug 1;7(7):e016236. doi: 10.1136/bmjopen-2017-016236 (PMC5642761; doi:10.1136/bmjopen-2017-016236), 2017-08-01
Supplement: bmjopen-2017-016236supp007.pdf [file bmjopen-2017-016236supp007.pdf]

## Appendix 6: Characteristics of those older patients for whom the decision to admit to hospital may be unclear

| Patient characteristics                                                                                                                | Studies which include such populations                                                                                                                                                                                     |
|----------------------------------------------------------------------------------------------------------------------------------------|----------------------------------------------------------------------------------------------------------------------------------------------------------------------------------------------------------------------------|
| <b>Age ≥75 years</b><br>for included patients                                                                                          | 15/19 studies<br><br>Mason 2007 & 2012; Benaiges 2014; Salvi 2008; Garasen 2007; Vincente 2014; Patel 2008; Mendoza 2009; Tibaldi 2009; Ricauda 2008; Kalra 2005; Rodriguez-Cerillo 2013; Leff 2005; Crilly 2010; Lau 2013 |
| <b>Co/multi-morbidities</b><br>in included patients stated either by number of conditions or multi-morbidity score e.g. Charlson Score | 9/19 studies<br><br>Benaiges 2014; Salvi 2008; Patel 2008; Mendoza 2009; Tibaldi 2009; Ricauda 2008; Carratala 2005; Leff 2005; Lau 2013                                                                                   |
| <b>Dementia</b><br>either stated in a) patient demographics or b) used as an exclusion criterion based on severity                     | a) 2/19 studies<br><br>Rodriguez-Cerillo 2009; Lau 2013<br><br>b) 8/19 studies<br><br>Mason 2007; Sun 2014; Salvi 2008; Garasen 2007; Mendoza 2009; Tibaldi 2009; Ricauda 2008; Lau 2013                                   |
| <b>Social care support</b><br>stated in inclusion/exclusion criteria                                                                   | 3/19 studies<br><br>Tibaldi 2009; Ricauda 2008; Kalra 2005;                                                                                                                                                                |
| <b>Home situation</b><br>stated in inclusion/exclusion criteria                                                                        | 7/19 studies<br><br>Benaiges 2014; Garasen 2007; Mendoza 2009; Ricauda 2008; Rodriguez-Cerillo 2009, 2013; Lau 2013                                                                                                        |
| <b>Individual coping abilities</b><br>stated in inclusion/exclusion criteria                                                           | 2/19 studies<br><br>Patel 2008; Rodriguez-Cerillo 2013                                                                                                                                                                     |
